# Supplementary material for: Toxoplasma gondii exploits the host ESCRT machinery for parasite uptake of host cytosolic proteins
Source: PLoS Pathog. 2021 Dec 13;17(12):e1010138. doi: 10.1371/journal.ppat.1010138 (PMC8700025; doi:10.1371/journal.ppat.1010138)
Supplement: S1 Dataset — Data are presented in 9 different tabs. The “Results Summary” tab provides an overview and heat map of the top protein hits identified for each of the three different conditions (Tz-HFF: tachyzoite fibroblast infection; Bz-HFF: bradyzoite fibroblast infection; Neuron: neuron infection). The tabs labeled “Condition_PeptideCalc” demonstrate the analysis pipeline, including equations used in Excel to ultimately calculate log2 protein fold changes and p-values. The tabs labeled “Condition_VolcanoPlot” provide a graphical overview of protein fold changes and short names for the top protein hits. Lastly, the “Peptide_RawData” tabs provide identification scores and PEP values for each unique peptide identified from either Toxoplasma-Human or Toxoplasma-Mouse combined proteome database searches. (XLSX) [file ppat.1010138.s008.xlsx]

## Sheet: Results Summary
		Log2 Fold Change vs Control				Negative Log2 p Value
Mammalian Protein	Uniprot ID	Tz-HFF	Bz-HFF	Neuron	Average	Tz-HFF	Bz-HFF	Neuron	Average	Notes
VPS37C	A5D8V6	6.33879	4.81861	2.25223	4.46988	5.47967	7.06755	3.08713	5.21145	ESCRT-I; Associates with PDCD6
Vinculin	P18206	5.78	1.57	0	2.45	11.6	1.87	0	4.49	Actin-filament binding protein
PDCD6 / ALG-2	O75340	5.75358	5.57628	6.36027	5.89671	17.3115	20.6623	12.9107	16.9615	AKA ALG-2; can bridge ESCRT-1 and ESCRT-III complexes by acting as a bridge between ALIX and TSG101 (1)
CHMP4B	Q9H444	5.59213	2.73155	1.44813	3.25727	13.5852	9.97042	1.33419	8.29661	ESCRT-III
PEF1	Q9UBV8	5.08219	3.79029	0	2.95749	7.87589	7.95185	0	5.27592	Peflin; can heterodimerize with PDCD6 and help coordinate Ca2+ dependent budding of ER vesicles via interaction with SEC31A
CHMP4A	Q9BY43	5.03396	1.11045	0	2.04813	9.63357	1.7098	0	3.78113	ESCRT-III
UMAD1	C9J7I0	4.72599	3.22266	0	2.64955	13.5404	8.55747	0	7.36597	Unproven link to ESCRT. Small protein consisting mainly of a UMA domain. MVB12A and MVB12B and UBAP1 use their UMA domains to bind VPS37 and VPS23/TSG101 in ESCRT-I (2, 3)
CHMP1A	Q9HD42	4.49752	1.31302	0	1.93685	7.23964	1.9872	0	3.07561	ESCRT-III
TSG101	Q99816	3.86149	2.49411	0	2.11853	6.46931	3.30032	0	3.25654	Associates with PDCD6
VPS37A	Q8NEZ2	3.65598	1.36796	0	1.67465	7.43361	2.06548	0	3.16636	ESCRT-I
VPS28	Q9UK41	3.37715	2.47755	2.63962	2.83144	5.81829	3.3933	3.30383	4.17181	ESCRT-I
ALIX	Q8WUM4	2.96071	0.939066	0	1.29993	4.17168	0.934981	0	1.70222	AKA PDCD6IP; Associates with PDCD6; adaptor for recruitment of ESCRT-III complex
		Log2 Fold Change vs Control				Negative Log2 p Value
T. gondii Protein	Toxodb ID	Tz-HFF	Bz-HFF	Neuron	Average	Tz-HFF	Bz-HFF	Neuron	Average	Notes
GRA14	TGME49_239740	5.94413	3.43741	4.89476	4.75877	38.5376	20.6771	13.0326	24.0825	PVM-associated GRA
GRA1	TGME49_270250	5.85797	6.47843	6.95235	6.42958	10.4504	8.46639	8.63735	9.18472	PV lumen GRA
GRA8	TGME49_254720	5.59158	3.45233	4.09401	4.3793	15.2838	11.998	2.65809	9.97995	PVM-associated GRA. TM domain near C-term.
GRA9	TGME49_251540	5.26407	4.10119	3.90822	4.42449	9.74074	8.37061	4.50177	7.53771	IVN-associated GRA. No TM domain. Upregulated in Bz including in Nc cyst wall. No obvous PRR.
GRA4	TGME49_310780	5.15	1.45	3.19	3.26333	9.9	1.13	2.89	4.64	IVN-associated GRA. No TM domain.
MAG1	TGME49_270240	4.92482	3.718	4.47127	4.37136	34.9175	31.1165	14.0865	26.7068	PV lumen GRA
GRA22	TGME49_215220	4.76776	1.72976	0	2.16584	12.1332	4.2216	0	5.45159	PVM-associated GRA.
MYR1	TGME49_254470	4.60342	1.95708	3.21924	3.25991	17.5809	4.73768	2.32917	8.2159	PVM-associated GRA
Hypothetical	TGME49_206340	4.50673	0	0	1.50224	11.6748	0	0	3.8916	Signal peptide. LOPIT outlier/endomembrane vesicles
ERC	TGME49_229480	4.49386	1.95407	2.72067	3.0562	20.0318	6.49501	3.55277	10.0265	ER associated
GRA15	TGME49_275470	4.46798	0.603557	2.12857	2.40003	12.9727	3.51938	3.51938	6.67047	PVM-associated GRA.
Hypothetical	TGME49_323100	3.78625	0	0	1.26208	12.2532	0	0	4.08439	No signal peptide or TM but LOPIT DG. MAF1a paralog.
GRA16	TGME49_208830	3.71798	0	0	1.23933	6.22284	0	0	2.07428	Effector GRA.
GRA7	TGME49_203310	3.59462	3.06979	3.81809	3.49417	18.7881	16.2522	7.8323	14.2909	PVM-associated GRA. TM domain near C-term.
Hypothetical	TGME49_267740	2.99058	0.682519	0	1.22437	11.7684	1.18582	0	4.31809	Signal peptide and TM domain. GRA48
Shown are hits from GRA14-HA IP of infected HFF (tachyzoite conditions: Tz-HFF; bradyzoite conditions: Bz-HFF) and infected mouse neuron lysates containing GRA14-HA protein vs control infected lysates without HA-tagged protein. Only proteins with >1 log2 fold change in tagged vs control lysates and a negative log2 p-value >3.32 (equivalent to p<0.1) in at least one of the conditions are shown for…
ND= Not detected
Below neg log2 3.32 threshold
				3.32 p<0.1
				4.32 p<0.05
	HIV YPxL vs ALIX 5 uM Kd
	HIVPTAP vs Tsg101 50 uM Kd

## Sheet: Tz-HFF_PeptideCalc
Protein Accession Number	Protein Descriptions	Peptide Sequence	Peptide Modifications	Peptide Intensity: Control Replicate 1	Peptide Intensity: Control Replicate 2	Peptide Intensity: Control Replicate 3	Peptide Intensity: GRA14-HA Replicate 1	Peptide Intensity: GRA14-HA Replicate 2	Peptide Intensity: GRA14-HA Replicate 3	Log2 Conversion	Control Replicate 1	Control Replicate 2	Control Replicate 3	GRA14-HA Replicate 1	GRA14-HA Replicate 2	GRA14-HA Replicate 3	Normalization	Control Replicate 1	Control Replicate 2	Control Replicate 3	GRA14-HA Replicate 1	GRA14-HA Replicate 2	GRA14-HA Replicate 3	Imputation	Control Replicate 1	Control Replicate 2	Control Replicate 3	GRA14-HA Replicate 1	GRA14-HA Replicate 2	GRA14-HA Replicate 3	T-Test	Average Peptide Log2 Fold Change	Average Protein Log2 Fold Change	Negative Log2 p Value
P22061	Protein-L-isoaspartate(D-aspartate) O-methyltransferase OS=Homo sapiens OX=9606 GN=PCMT1 PE=1 SV=4	[R].LILPVGPAGGNQMLEQYDKLQDGSIK.[M]	1xOxidation [M13]		342485	93217.8						18.3857	16.5083						-0.368963	-1.212					-4.99386	-0.368963	-1.212	-4.53405	-4.90433	-4.4835		-2.44902	-0.592724	1.15139
P07910	Heterogeneous nuclear ribonucleoproteins C1/C2 OS=Homo sapiens OX=9606 GN=HNRNPC PE=1 SV=4	[R].MIAGQVLDINLAAEPK.[V]	1xOxidation [M1]	62585.6	159225	36066.3			70809.3		15.9335	17.2807	15.1384			16.1117		-1.27316	-1.47394	-2.58196			-0.88075		-1.27316	-1.47394	-2.58196	-4.61103	-4.87049	-0.88075		-1.67774	-0.56118	0.85365
Q9NYL9	Tropomodulin-3 OS=Homo sapiens OX=9606 GN=TMOD3 PE=1 SV=1	[K].MLEENTNILK.[F]			2.26621e+06	793645			130737			21.1118	19.5981			16.9963			2.3572	1.87781			0.00390634		-4.81887	2.3572	1.87781	-4.50421	-4.75085	0.00390634		-2.8891	-1.8006	9.86752
Q9NYL9	Tropomodulin-3 OS=Homo sapiens OX=9606 GN=TMOD3 PE=1 SV=1	[K].MLEENTNILK.[F]	1xOxidation [M1]	300143	2.55606e+06	652503	131180	138996	170726		18.1953	21.2855	19.3156	17.0012	17.0847	17.3813		0.988586	2.53084	1.5953	0.10475	0.605515	0.388919		0.988586	2.53084	1.5953	0.10475	0.605515	0.388919		-1.33852	-1.8006	9.86752
P10599	Thioredoxin OS=Homo sapiens OX=9606 GN=TXN PE=1 SV=3	[K].MIKPFFHSLSEK.[Y]	1xOxidation [M1]		106996	23288.6	18133.7		24591.3			16.7072	14.5073	14.1464		14.5859			-2.04745	-3.21299	-2.75005		-2.40654		-4.83004	-2.04745	-3.21299	-2.75005	-4.90658	-2.40654		0.00909995	0.432398	0.440437
TGME49_229480-t26_1-p1	transcript=TGME49_229480-t26_1 | gene=TGME49_229480 | organism=Toxoplasma_gondii_ME49 | gene_product=calcium binding protein precursor, putative | transcript_product=calcium binding protein precursor, putative | location=TGME49_chrVIII:292754-295302(-) | protein_length=335 | sequence_SO=chromosome | SO=protein_coding | is_pseudo=false	[R].MLLEEFTK.[D]	1xOxidation [M1]				1.30457e+06	675185	789800					20.3151	19.3649	19.5911					3.41871	2.88575	2.59873		-5.02692	-5.40597	-4.77598	3.41871	2.88575	2.59873		8.03735	4.48727	20.0107
P17931	Galectin-3 OS=Homo sapiens OX=9606 GN=LGALS3 PE=1 SV=5	[R].MLITILGTVKPNANR.[I]	1xOxidation [M1]		69548.4	47291.9						16.0857	15.5293						-2.66892	-2.19101					-4.91927	-2.66892	-2.19101	-4.57464	-4.87662	-4.68147		-1.45118	-1.06662	1.17836
TGME49_239740-t26_1-p1	transcript=TGME49_239740-t26_1 | gene=TGME49_239740 | organism=Toxoplasma_gondii_ME49 | gene_product=dense granule protein GRA14 | transcript_product=dense granule protein GRA14 | location=TGME49_chrVI:883160-884386(-) | protein_length=408 | sequence_SO=chromosome | SO=protein_coding | is_pseudo=false	[R].MLQSGTSETTK.[L]					111130	70828	153534					16.7619	16.112	17.2282					-0.134543	-0.367141	0.235801		-5.04253	-5.2316	-4.96044	-0.134543	-0.367141	0.235801		4.98956	5.93448	38.4972
Q9UGY1	Nucleolar protein 12 OS=Homo sapiens OX=9606 GN=NOL12 PE=1 SV=1	[K].MLAEREEALEEADELDR.[L]	1xOxidation [M1]		106129							16.6955							-2.05918						-4.91593	-2.05918	-4.76963	-4.62305	-4.67244	-4.54306		-0.697931	-0.386779	0.558282
TGME49_239740-t26_1-p1	transcript=TGME49_239740-t26_1 | gene=TGME49_239740 | organism=Toxoplasma_gondii_ME49 | gene_product=dense granule protein GRA14 | transcript_product=dense granule protein GRA14 | location=TGME49_chrVI:883160-884386(-) | protein_length=408 | sequence_SO=chromosome | SO=protein_coding | is_pseudo=false	[R].MLQSGTSETTK.[L]	1xOxidation [M1]				488789	393870	398520					18.8989	18.5874	18.6043					2.00241	2.10819	1.61189		-5.01771	-5.38607	-4.80244	2.00241	2.10819	1.61189		6.97624	5.93448	38.4972
P62244	40S ribosomal protein S15a OS=Homo sapiens OX=9606 GN=RPS15A PE=1 SV=2	[R].MNVLADALK.[S]	1xOxidation [M1]	147766	256907	120260	72619.5	93413	66590.3		17.173	17.9709	16.8758	16.1481	16.5113	16.023		-0.0337478	-0.783761	-0.844527	-0.748366	0.0321626	-0.969378		-0.0337478	-0.783761	-0.844527	-0.748366	0.0321626	-0.969378		-0.00784889	0.118599	0.0813791
TGME49_254470-t26_1-p1	transcript=TGME49_254470-t26_1 | gene=TGME49_254470 | organism=Toxoplasma_gondii_ME49 | gene_product=hypothetical protein | transcript_product=hypothetical protein | location=TGME49_chrIII:1759224-1763403(+) | protein_length=732 | sequence_SO=chromosome | SO=protein_coding | is_pseudo=false	[R].MPPYFAVPTEAAGR.[A]	1xOxidation [M1]				571557	55932.1	239259					19.1245	15.7714	17.8682					2.2281	-0.707783	0.875811		-4.87397	-5.33562	-4.86765	2.2281	-0.707783	0.875811		5.82446	4.61419	17.6154
P35580	Myosin-10 OS=Homo sapiens OX=9606 GN=MYH10 PE=1 SV=3	[K].MQAHIQDLEEQLDEEEGAR.[Q]	1xOxidation [M1]		777316	221476			48386.3			19.5681	17.7568			15.5623			0.813496	0.0364715			-1.43009		-5.00902	0.813496	0.0364715	-4.66938	-4.81132	-1.43009		-2.25058	-1.95045	59.9637
Q9NZN3	EH domain-containing protein 3 OS=Homo sapiens OX=9606 GN=EHD3 PE=1 SV=2	[R].MQDQLQAQDFSK.[F]	1xOxidation [M1]		24772.9							14.5965							-4.15817						-5.07416	-4.15817	-4.92138	-4.46449	-4.74547	-4.49316		0.1502	-0.166982	0.115651
Q9H4M9	EH domain-containing protein 1 OS=Homo sapiens OX=9606 GN=EHD1 PE=1 SV=2	[K].MQELLQTQDFSK.[F]	1xOxidation [M1]		66823.5							16.0281							-2.72658						-5.07547	-2.72658	-4.85695	-4.42151	-4.60927	-4.53081		-0.300861	-1.0843	1.83681
P35579	Myosin-9 OS=Homo sapiens OX=9606 GN=MYH9 PE=1 SV=4	[K].MQLAKKEEELQAALAR.[V]	1xOxidation [M1]		327558	95324.5			27071.2			18.3214	16.5406			14.7245			-0.433253	-1.17976			-2.26793		-5.07019	-0.433253	-1.17976	-4.41306	-4.7947	-2.26793		-1.5975	-1.7311	75.0609
P35579	Myosin-9 OS=Homo sapiens OX=9606 GN=MYH9 PE=1 SV=4	[K].MQQNIQELEEQLEEEESAR.[Q]	1xOxidation [M1]		1.13833e+06	328034	42126.2		25636.6			20.1185	18.3235	15.3624		14.6459			1.36384	0.603164	-1.53401		-2.34649		-5.00549	1.36384	0.603164	-1.53401	-4.79829	-2.34649		-1.8801	-1.7311	75.0609
Q08554	Desmocollin-1 OS=Homo sapiens OX=9606 GN=DSC1 PE=1 SV=2	[R].MKVQDQDLPNTPHSK.[A]	1xOxidation [M1]		97945.5		44845	142048	138047			16.5797		15.4527	17.116	17.0748			-2.17495		-1.44378	0.636842	0.0824026		-4.92044	-2.17495	-4.86699	-1.44378	0.636842	0.0824026		3.74595	1.22257	2.44456
P22061	Protein-L-isoaspartate(D-aspartate) O-methyltransferase OS=Homo sapiens OX=9606 GN=PCMT1 PE=1 SV=4	[K].MKPLMGVIYVPLTDKEK.[Q]	2xOxidation [M1	108108	488685	208225	204190	22221.5	97324.2		16.7221	18.8985	17.6678	17.6395	14.4397	16.5705		-0.484592	0.1439	-0.0525354	0.743113	-2.03951	-0.421891		-0.484592	0.1439	-0.0525354	0.743113	-2.03951	-0.421891		-0.441685	-0.592724	1.15139
P35580	Myosin-10 OS=Homo sapiens OX=9606 GN=MYH10 PE=1 SV=3	[K].MEEEILLLEDQNSK.[F]	1xOxidation [M1]		353210	99039.1						18.4302	16.5957						-0.324479	-1.12461					-4.79222	-0.324479	-1.12461	-4.51302	-4.69071	-4.49985		-2.48743	-1.95045	59.9637
TGME49_229480-t26_1-p1	transcript=TGME49_229480-t26_1 | gene=TGME49_229480 | organism=Toxoplasma_gondii_ME49 | gene_product=calcium binding protein precursor, putative | transcript_product=calcium binding protein precursor, putative | location=TGME49_chrVIII:292754-295302(-) | protein_length=335 | sequence_SO=chromosome | SO=protein_coding | is_pseudo=false	[R].MEFQAIDKDNDGK.[V]	1xOxidation [M1]				181728	200925	127553					17.4714	17.6163	16.9607					0.574986	1.13712	-0.0316595		-4.99548	-5.20847	-4.93113	0.574986	1.13712	-0.0316595		5.60518	4.48727	20.0107
P09493	Tropomyosin alpha-1 chain OS=Homo sapiens OX=9606 GN=TPM1 PE=1 SV=2 Tropomyosin alpha-3 chain OS=Homo sapiens OX=9606 GN=TPM3 PE=1 SV=2	[K].MEIQEIQLK.[E]			1.8411e+06	398178			103225			20.8121	18.6031			16.6554			2.05749	0.882735			-0.336969		-5.06483	2.05749	0.882735	-4.50314	-4.65436	-0.336969		-2.45662	-0.922806	4.58781
P09493	Tropomyosin alpha-1 chain OS=Homo sapiens OX=9606 GN=TPM1 PE=1 SV=2 Tropomyosin alpha-3 chain OS=Homo sapiens OX=9606 GN=TPM3 PE=1 SV=2	[K].MEIQEIQLK.[E]	1xOxidation [M1]	140238	1.28222e+06	254163	65040.1	121353	117023		17.0975	20.2902	17.9554	15.989	16.8889	16.8364		-0.109187	1.53556	0.235072	-0.907394	0.409683	-0.155971		-0.109187	1.53556	0.235072	-0.907394	0.409683	-0.155971		-0.771711	-0.922806	4.58781
P67936	Tropomyosin alpha-4 chain OS=Homo sapiens OX=9606 GN=TPM4 PE=1 SV=3 Tropomyosin beta chain OS=Homo sapiens OX=9606 GN=TPM2 PE=1 SV=1	[K].MELQEMQLK.[E]			1.83005e+06	681721			120429			20.8034	19.3788			16.8778			2.0488	1.6585			-0.114581		-5.0763	2.0488	1.6585	-4.69542	-4.82739	-0.114581		-2.75613	-1.11715	10.5206
P67936	Tropomyosin alpha-4 chain OS=Homo sapiens OX=9606 GN=TPM4 PE=1 SV=3 Tropomyosin beta chain OS=Homo sapiens OX=9606 GN=TPM2 PE=1 SV=1	[K].MELQEMQLK.[E]	1xOxidation [M]	59452.5	1.28252e+06	371542	39265		132708		15.8595	20.2905	18.5032	15.261		17.0179		-1.34725	1.5359	0.782845	-1.63548		0.0254944		-1.34725	1.5359	0.782845	-1.63548	-4.87908	0.0254944		-2.48685	-1.11715	10.5206
P13647	Keratin, type II cytoskeletal 5 OS=Homo sapiens OX=9606 GN=KRT5 PE=1 SV=3	[K].MFFDAELSQMQTHVSDTSVVLSMDNNR.[N]	3xOxidation [M1		132871							17.0197							-1.73498						-5.00969	-1.73498	-4.88563	-4.65277	-4.79754	-4.689		-0.836339	0.091607	0.259862
P63220	40S ribosomal protein S21 OS=Homo sapiens OX=9606 GN=RPS21 PE=1 SV=1	[R].MGESDDSILR.[L]	1xOxidation [M1]	192934	138307	120261	148162	142106	130831		17.5577	17.0775	16.8758	17.1768	17.1166	16.9973		0.351047	-1.67713	-0.844512	0.280383	0.637439	0.00493853		0.351047	-1.67713	-0.844512	0.280383	0.637439	0.00493853		1.03112	0.589821	1.02806
P52272	Heterogeneous nuclear ribonucleoprotein M OS=Homo sapiens OX=9606 GN=HNRNPM PE=1 SV=3	[R].MGPAMGPALGAGIER.[M]	2xOxidation [M1	38817	68779	38857.9	24248.5	25884	28605.7		15.2444	16.0697	15.2459	14.5656	14.6598	14.804		-1.9623	-2.68496	-2.4744	-2.33083	-1.8194	-2.18839		-1.9623	-2.68496	-2.4744	-2.33083	-1.8194	-2.18839		0.261017	-0.15355	0.227603
TGME49_254720-t26_1-p1	transcript=TGME49_254720-t26_1 | gene=TGME49_254720 | organism=Toxoplasma_gondii_ME49 | gene_product=dense granule protein GRA8 | transcript_product=dense granule protein GRA8 | location=TGME49_chrIII:1904580-1905389(+) | protein_length=269 | sequence_SO=chromosome | SO=protein_coding | is_pseudo=false	[R].MGPSDISTHVR.[G]			22196.7		339853		267810			14.4381		18.3746		18.0308			-4.31659		1.47812		1.03845		-4.86762	-4.31659	-4.73463	1.47812	-4.64163	1.03845		3.93126	5.58595	15.2749
TGME49_254720-t26_1-p1	transcript=TGME49_254720-t26_1 | gene=TGME49_254720 | organism=Toxoplasma_gondii_ME49 | gene_product=dense granule protein GRA8 | transcript_product=dense granule protein GRA8 | location=TGME49_chrIII:1904580-1905389(+) | protein_length=269 | sequence_SO=chromosome | SO=protein_coding | is_pseudo=false	[R].MGPSDISTHVR.[G]	1xOxidation [M1]				2.07692e+06	1.4614e+06	941948					20.986	20.4789	19.8453					4.08958	3.99975	2.85289		-5.00476	-5.13122	-4.81735	4.08958	3.99975	2.85289		8.63185	5.58595	15.2749
P17302	Gap junction alpha-1 protein OS=Homo sapiens OX=9606 GN=GJA1 PE=1 SV=2	[R].MGQAGSTISNSHAQPFDFPDDNQNSK.[K]	1xOxidation [M1]	65925	312569	164853	35563.5		49935.9		16.0085	18.2538	17.3308	15.1181		15.6078		-1.19816	-0.500829	-0.389502	-1.77833		-1.38461		-1.19816	-0.500829	-0.389502	-1.77833	-4.86744	-1.38461		-1.98063	-1.89798	3.40847
P17302	Gap junction alpha-1 protein OS=Homo sapiens OX=9606 GN=GJA1 PE=1 SV=2	[R].MGQAGSTISNSHAQPFDFPDDNQNSKK.[L]	1xOxidation [M1]		148423	79256.9			14416.3			17.1794	16.2742			13.8154			-1.57529	-1.44607			-3.17699		-4.9143	-1.57529	-1.44607	-4.6956	-4.66066	-3.17699		-1.53253	-1.89798	3.40847
P61254	60S ribosomal protein L26 OS=Homo sapiens OX=9606 GN=RPL26 PE=1 SV=1 60S ribosomal protein L26-like 1 OS=Homo sapiens OX=9606 GN=RPL26L1 PE=1 SV=1	[-].MKFNPFVTSDR.[S]	1xOxidation [M1]	225359	951417	314935	210544	77764.4	140657		17.7819	19.8597	18.2647	17.6838	16.2468	17.1018		0.575164	1.10507	0.544374	0.787326	-0.23235	0.109417		0.575164	1.10507	0.544374	0.787326	-0.23235	0.109417		-0.520073	-0.687735	2.38245
P46781	40S ribosomal protein S9 OS=Homo sapiens OX=9606 GN=RPS9 PE=1 SV=3	[K].MKLDYILGLK.[I]	1xOxidation [M1]	1.08396e+06	1.41164e+06	1.11549e+06	983693	804679	908357		20.0479	20.4289	20.0892	19.9078	19.6181	19.7929		2.84118	1.6743	2.36892	3.01141	3.13888	2.8005		2.84118	1.6743	2.36892	3.01141	3.13888	2.8005		0.688797	-1.14733	1.96024
P52272	Heterogeneous nuclear ribonucleoprotein M OS=Homo sapiens OX=9606 GN=HNRNPM PE=1 SV=3	[R].MGLAMGGGGGASFDR.[A]	2xOxidation [M1	25312.6	38906.1	22209.9	10524.2	10966	19510.5		14.6276	15.2477	14.4389	13.3614	13.4207	14.252		-2.57913	-3.50694	-3.28141	-3.53502	-3.05843	-2.74044		-2.57913	-3.50694	-3.28141	-3.53502	-3.05843	-2.74044		0.0111969	-0.15355	0.227603
P56945	Breast cancer anti-estrogen resistance protein 1 OS=Homo sapiens OX=9606 GN=BCAR1 PE=1 SV=2	[K].MEDVHQTLVAHGQALDAGR.[G]	1xOxidation [M1]	77896.8	380265	198581	24904.3	8864.79	10162.6		16.2493	18.5366	17.5994	14.6041	13.1139	13.311		-0.957425	-0.218	-0.120954	-2.29233	-3.3653	-3.68142		-0.957425	-0.218	-0.120954	-2.29233	-3.3653	-3.68142		-2.68089	-1.30325	6.48799
Q13885	Tubulin beta-2A chain OS=Homo sapiens OX=9606 GN=TUBB2A PE=1 SV=1 Tubulin beta-4B chain OS=Homo sapiens OX=9606 GN=TUBB4B PE=1 SV=1 Tubulin beta-2B chain OS=Homo sapiens OX=9606 GN=TUBB2B PE=1 SV=1	[K].MSATFIGNSTAIQELFK.[R]	1xOxidation [M1]		107582	25877.6	27046					16.7151	14.6594	14.7231					-2.03957	-3.06091	-2.17331				-4.92548	-2.03957	-3.06091	-2.17331	-4.74444	-4.51972		-0.470506	-0.352122	1.0173
Q7L7L0	Histone H2A type 3 OS=Homo sapiens OX=9606 GN=HIST3H2A PE=1 SV=3	[R].NDEELNKLLGR.[V]		1.82773e+06	1.51191e+06	298703	162133	66951.4	204027		20.8016	20.5279	18.1884	17.3068	16.0308	17.6384		3.59492	1.7733	0.468032	0.410381	-0.448346	0.646001		3.59492	1.7733	0.468032	0.410381	-0.448346	0.646001		-1.74274	-1.74274	2.42816
P18583	Protein SON OS=Homo sapiens OX=9606 GN=SON PE=1 SV=4	[R].NEGQLNGETNTPIEGNQAGDAAASAR.[S]		178627	253613	149952	92371.3	76954.3	83387.8		17.4466	17.9523	17.1941	16.4952	16.2317	16.3475		0.239886	-0.802375	-0.52618	-0.401279	-0.247459	-0.644853		0.239886	-0.802375	-0.52618	-0.401279	-0.247459	-0.644853		-0.0683075	0.230246	0.639001
P11021	Endoplasmic reticulum chaperone BiP OS=Homo sapiens OX=9606 GN=HSPA5 PE=1 SV=2	[R].NELESYAYSLK.[N]			168552	104139			59840.2			17.3628	16.6681			15.8688			-1.39181	-1.05217			-1.12358		-4.83548	-1.39181	-1.05217	-4.6658	-4.65805	-1.12358		-1.05598	-0.218298	0.708121
P07237	Protein disulfide-isomerase OS=Homo sapiens OX=9606 GN=P4HB PE=1 SV=3	[K].NFEDVAFDEKK.[N]			1.75158e+06	727389			196488			20.7402	19.4724			17.5841			1.98558	1.75205			0.591676		-4.89155	1.98558	1.75205	-4.68592	-4.80313	0.591676		-2.58115	-0.212678	0.355199
Q8IWK6	Adhesion G protein-coupled receptor A3 OS=Homo sapiens OX=9606 GN=ADGRA3 PE=1 SV=2	[R].NFEKPVSTTSK.[K]		79896.9	87896.8	88254.5	52175.2	39945.8			16.2859	16.4235	16.4294	15.6711	15.2858			-0.92085	-2.33112	-1.29094	-1.22536	-1.19342			-0.92085	-2.33112	-1.29094	-1.22536	-1.19342	-4.53199		-0.802618	0.094451	0.122435
P62424	60S ribosomal protein L7a OS=Homo sapiens OX=9606 GN=RPL7A PE=1 SV=2	[K].NFGIGQDIQPK.[R]		42045.3	146247	50282.5		21494.6	38663.6		15.3597	17.158	15.6178		14.3917	15.2387		-1.84704	-1.5966	-2.10255		-2.08748	-1.75371		-1.84704	-1.5966	-2.10255	-4.62233	-2.08748	-1.75371		-0.972446	-0.653911	0.479807
Q16777	Histone H2A type 2-C OS=Homo sapiens OX=9606 GN=HIST2H2AC PE=1 SV=4	[R].NDEELNKLLGK.[V]		7.76838e+06	5.97106e+06	1.27321e+06	519589	469603	691935		22.8892	22.5096	20.28	18.987	18.8411	19.4003		5.68248	3.75491	2.55972	2.09057	2.36191	2.40788		5.68248	3.75491	2.55972	2.09057	2.36191	2.40788		-1.71225	-1.42316	2.91486
Q00839	Heterogeneous nuclear ribonucleoprotein U OS=Homo sapiens OX=9606 GN=HNRNPU PE=1 SV=6	[R].NFILDQTNVSAAAQR.[R]		21688.3							14.4046							-2.80207							-2.80207	-5.29126	-4.70574	-4.45193	-4.70776	-4.69664		-0.352419	-0.337796	0.479685
P37802	Transgelin-2 OS=Homo sapiens OX=9606 GN=TAGLN2 PE=1 SV=3	[R].NFSDNQLQEGK.[N]		86847.3	203585	112016	37885.6	39072	47383.1		16.4062	17.6353	16.7733	15.2094	15.2538	15.5321		-0.800509	-1.11938	-0.946974	-1.68708	-1.22532	-1.46032		-0.800509	-1.11938	-0.946974	-1.68708	-1.22532	-1.46032		-0.501952	-0.404367	0.504125
TGME49_214940-t26_1-p1	transcript=TGME49_214940-t26_1 | gene=TGME49_214940 | organism=Toxoplasma_gondii_ME49 | gene_product=MIC2-associated protein M2AP | transcript_product=MIC2-associated protein M2AP | location=TGME49_chrX:6604937-6607122(+) | protein_length=330 | sequence_SO=chromosome | SO=protein_coding | is_pseudo=false	[K].NFSGEDSSEIDEK.[E]					76151.1	91525.6	96436.4					16.2166	16.4819	16.5573					-0.67986	0.00271561	-0.435112		-5.08536	-5.12399	-4.89133	-0.67986	0.00271561	-0.435112		4.66281	3.96739	5.2384
TGME49_214940-t26_1-p1	transcript=TGME49_214940-t26_1 | gene=TGME49_214940 | organism=Toxoplasma_gondii_ME49 | gene_product=MIC2-associated protein M2AP | transcript_product=MIC2-associated protein M2AP | location=TGME49_chrX:6604937-6607122(+) | protein_length=330 | sequence_SO=chromosome | SO=protein_coding | is_pseudo=false	[K].NFSGEDSSEIDEKEVSLPIK.[S]					189969		176089					17.5354		17.4259					0.638967		0.433545		-5.06399	-5.35218	-4.84185	0.638967	-4.65522	0.433545		3.89177	3.96739	5.2384
P16401	Histone H1.5 OS=Homo sapiens OX=9606 GN=HIST1H1B PE=1 SV=3	[R].NGLSLAALKK.[A]		8.83797e+06	2.06699e+07	6.51504e+06	4.42395e+06	3.48667e+06	2.829e+06		23.0753	24.301	22.6353	22.0769	21.7334	21.4319		5.86858	5.54639	4.91502	5.18047	5.25425	4.43946		5.86858	5.54639	4.91502	5.18047	5.25425	4.43946		-0.485271	-0.31797	0.899107
O75367	Core histone macro-H2A.1 OS=Homo sapiens OX=9606 GN=H2AFY PE=1 SV=4	[K].NGPLEVAGAAVSAGHGLPAK.[F]		24537.9							14.5827							-2.62398							-2.62398	-5.16648	-4.93611	-4.70187	-4.84029	-4.64764		-0.487745	-1.1738	1.67435
P21333	Filamin-A OS=Homo sapiens OX=9606 GN=FLNA PE=1 SV=4	[K].NGQHVASSPIPVVISQSEIGDASR.[V]			127146	72239.5						16.9561	16.1405						-1.79852	-1.57982					-4.90312	-1.79852	-1.57982	-4.58727	-4.83738	-4.60844		-1.91721	-0.801463	6.54648
P13645	Keratin, type I cytoskeletal 10 OS=Homo sapiens OX=9606 GN=KRT10 PE=1 SV=6	[K].NHEEEMKDLR.[N]			3.27639e+06	198697	106371		417524			21.6437	17.6002	16.6987		18.6715			2.88903	-0.120111	-0.197697		1.6791		-5.05575	2.88903	-0.120111	-0.197697	-4.75602	1.6791		-0.329261	-0.141331	0.518507
P35579	Myosin-9 OS=Homo sapiens OX=9606 GN=MYH9 PE=1 SV=4	[K].NFINNPLAQADWAAK.[K]			1.09415e+06	672510			72581.5			20.0614	19.3592			16.1473			1.30673	1.63887			-0.845087		-4.95014	1.30673	1.63887	-4.54473	-4.69969	-0.845087		-2.69499	-1.7311	75.0609
Q13885	Tubulin beta-2A chain OS=Homo sapiens OX=9606 GN=TUBB2A PE=1 SV=1 Tubulin beta-4B chain OS=Homo sapiens OX=9606 GN=TUBB4B PE=1 SV=1 Tubulin beta-2B chain OS=Homo sapiens OX=9606 GN=TUBB2B PE=1 SV=1	[K].MSATFIGNSTAIQELFKR.[I]	1xOxidation [M1]		74171.2							16.1786							-2.57607						-4.94737	-2.57607	-4.90286	-4.53173	-4.72255	-4.69831		-0.508763	-0.352122	1.0173
O14613	Cdc42 effector protein 2 OS=Homo sapiens OX=9606 GN=CDC42EP2 PE=1 SV=1	[K].NAISLPVIGGPQALTLPTAQAPPKPPR.[L]			111183							16.7626							-1.99207						-5.05596	-1.99207	-4.75884	-4.48635	-4.72661	-4.51687		-0.640986	-0.640986	0.78839
P35579	Myosin-9 OS=Homo sapiens OX=9606 GN=MYH9 PE=1 SV=4	[R].NAEQYKDQADKASTR.[L]			2.5522e+06	352985		130412	142315			21.2833	18.4292		16.9927	17.1187			2.52867	0.708924		0.513539	0.126331		-4.95858	2.52867	0.708924	-4.56005	0.513539	0.126331		-0.733064	-1.7311	75.0609
P16401	Histone H1.5 OS=Homo sapiens OX=9606 GN=HIST1H1B PE=1 SV=3	[-].MSETAPAETATPAPVEK.[S]	1xAcetyl [N-Term]																						-4.84303	-5.22032	-4.79579	-4.49107	-4.90435	-4.45685		0.335624	-0.31797	0.899107
P35908	Keratin, type II cytoskeletal 2 epidermal OS=Homo sapiens OX=9606 GN=KRT2 PE=1 SV=2	[R].MSGDLSSNVTVSVTSSTISSNVASK.[A]			269900	72614.9	38719.4	22030.8	36558.2			18.0421	16.148	15.2408	14.4272	15.1579			-0.712578	-1.57234	-1.65567	-2.05194	-1.83449		-5.01391	-0.712578	-1.57234	-1.65567	-2.05194	-1.83449		0.585578	0.181252	0.903762
P35908	Keratin, type II cytoskeletal 2 epidermal OS=Homo sapiens OX=9606 GN=KRT2 PE=1 SV=2	[R].MSGDLSSNVTVSVTSSTISSNVASK.[A]	1xOxidation [M1]	74879.4	1.93198e+06	478994	251390	105671	386820		16.1923	20.8816	18.8696	17.9396	16.6892	18.5613		-1.01442	2.127	1.14933	1.04313	0.210054	1.5689		-1.01442	2.127	1.14933	1.04313	0.210054	1.5689		0.186727	0.181252	0.903762
P04264	Keratin, type II cytoskeletal 1 OS=Homo sapiens OX=9606 GN=KRT1 PE=1 SV=6	[R].MSGECAPNVSVSVSTSHTTISGGGSR.[G]	1xCarbamidomethyl [C5]		76503.2			33918	28813.5			16.2232			15.0498	14.8145			-2.53141			-1.42941	-2.17794		-4.93023	-2.53141	-4.70437	-4.55667	-1.42941	-2.17794		1.334	-0.0837483	0.431184
P41208	Centrin-2 OS=Homo sapiens OX=9606 GN=CETN2 PE=1 SV=1	[R].MSPKPELTEEQKQEIR.[E]	1xOxidation [M1]	58597.7				12178.8			15.8386				13.5721			-1.36815				-2.90709			-1.36815	-5.18162	-4.68925	-4.63851	-2.90709	-4.50346		-0.270014	-1.1527	1.27931
P02533	Keratin, type I cytoskeletal 14 OS=Homo sapiens OX=9606 GN=KRT14 PE=1 SV=4 Keratin, type I cytoskeletal 19 OS=Homo sapiens OX=9606 GN=KRT19 PE=1 SV=4	[R].MSVEADINGLR.[R]	1xOxidation [M1]		891129	65684.2		69550.1	48595.3			19.7653	16.0033		16.0858	15.5685			1.01063	-1.71706		-0.393407	-1.42387		-4.82052	1.01063	-1.71706	-4.54403	-0.393407	-1.42387		-0.27812	0.0182555	0.0639849
P0DMV9	Heat shock 70 kDa protein 1B OS=Homo sapiens OX=9606 GN=HSPA1B PE=1 SV=1	[K].NALESYAFNMK.[S]	1xOxidation [M10]	29992.7	143436	61408.3	33102.8	18067.6	45081.7		14.8723	17.13	15.9061	15.0147	14.1411	15.4603		-2.33438	-1.6246	-1.81418	-1.88177	-2.33805	-1.53215		-2.33438	-1.6246	-1.81418	-1.88177	-2.33805	-1.53215		0.00706107	0.00706107	0.024416
P06748	Nucleophosmin OS=Homo sapiens OX=9606 GN=NPM1 PE=1 SV=2	[K].MSVQPTVSLGGFEITPPVVLR.[L]	1xOxidation [M1]		40807.5							15.3165							-3.4381						-5.08681	-3.4381	-4.69335	-4.67995	-4.6582	-4.65513		-0.258341	-0.360569	0.444062
P07305	Histone H1.0 OS=Homo sapiens OX=9606 GN=H1F0 PE=1 SV=3	[-].MTENSTSAPAAKPK.[R]	1xAcetyl [N-Term]	2.84089e+06	8326451	4.52573e+06	1.56959e+06	738984	1.86414e+06		21.4379	22.9893	22.1097	20.582	19.4952	20.8301		4.23121	4.23462	4.3894	3.68552	3.01601	3.83768		4.23121	4.23462	4.3894	3.68552	3.01601	3.83768		-0.772008	-0.798558	2.45748
Q8N474	Secreted frizzled-related protein 1 OS=Homo sapiens OX=9606 GN=SFRP1 PE=1 SV=1	[K].MVLPNLLEHETMAEVK.[Q]	2xOxidation [M1	112926	1.72227e+06	650195	202815		259924		16.785	20.7159	19.3105	17.6298		17.9877		-0.421686	1.96123	1.59019	0.733371		0.995326		-0.421686	1.96123	1.59019	0.733371	-4.7812	0.995326		-2.06075	-1.35647	2.37073
P11021	Endoplasmic reticulum chaperone BiP OS=Homo sapiens OX=9606 GN=HSPA5 PE=1 SV=2	[R].MVNDAEKFAEEDKK.[L]	1xOxidation [M1]		64484.5	22504.3		16710.6	23765.9			15.9767	14.4579		14.0285	14.5366			-2.77798	-3.26241		-2.4507	-2.4558		-5.06201	-2.77798	-3.26241	-4.60511	-2.4507	-2.4558		0.530264	-0.218298	0.708121
TGME49_300100-t26_1-p1	transcript=TGME49_300100-t26_1 | gene=TGME49_300100 | organism=Toxoplasma_gondii_ME49 | gene_product=rhoptry neck protein RON2 | transcript_product=rhoptry neck protein RON2 | location=TGME49_chrXII:214746-225245(-) | protein_length=1479 | sequence_SO=chromosome | SO=protein_coding | is_pseudo=false	[K].MYEVANSYVQQR.[G]	1xOxidation [M1]				29328.3		8445.24					14.84		13.0439					-2.05643		-3.94848		-4.91919	-5.3582	-4.80212	-2.05643	-4.76891	-3.94848		1.43523	0.423899	0.305096
TGME49_290700-t26_1-p1	transcript=TGME49_290700-t26_1 | gene=TGME49_290700 | organism=Toxoplasma_gondii_ME49 | gene_product=hypothetical protein | transcript_product=hypothetical protein | location=TGME49_chrIX:3850189-3851136(+) | protein_length=315 | sequence_SO=chromosome | SO=protein_coding | is_pseudo=false	[K].NAEQKPEVPVAPVADDDAGSEEESSSHYGVK.[T]					70196.6							16.0991							-0.797322				-4.8593	-5.24265	-4.96253	-0.797322	-4.8873	-4.52883		1.61701	1.61701	1.5497
P35579	Myosin-9 OS=Homo sapiens OX=9606 GN=MYH9 PE=1 SV=4	[R].NAEQYKDQADK.[A]		240278	3.3653e+06	2.0087e+06					17.8743	21.6823	20.9378					0.667643	2.92766	3.21751					0.667643	2.92766	3.21751	-4.45241	-4.73789	-4.42353		-6.80888	-1.7311	75.0609
P56945	Breast cancer anti-estrogen resistance protein 1 OS=Homo sapiens OX=9606 GN=BCAR1 PE=1 SV=2	[K].MEDVHQTLVAHGQALDAGR.[G]			196640	53263						17.5852	15.7008						-1.16944	-2.01948					-5.08072	-1.16944	-2.01948	-4.66647	-4.6337	-4.46931		-1.83328	-1.30325	6.48799
P35579	Myosin-9 OS=Homo sapiens OX=9606 GN=MYH9 PE=1 SV=4	[K].MEDSVGCLETAEEVKR.[K]	1xCarbamidomethyl [C7]	26324.7	467354	179087		12087.4	19689.4		14.6841	18.8342	17.4503		13.5612	14.2651		-2.52257	0.0795116	-0.27002		-2.91795	-2.72727		-2.52257	0.0795116	-0.27002	-4.40594	-2.91795	-2.72727		-2.44603	-1.7311	75.0609
Q09666	Neuroblast differentiation-associated protein AHNAK OS=Homo sapiens OX=9606 GN=AHNAK PE=1 SV=2	[K].ISMPDLDLNLKGPK.[VM]	1xOxidation [M3]																						-4.93739	-5.37848	-4.92399	-4.47518	-4.84309	-4.41067		0.503638	0.593635	3.00819
Q09666	Neuroblast differentiation-associated protein AHNAK OS=Homo sapiens OX=9606 GN=AHNAK PE=1 SV=2	[K].ISMPDVDLHLKGPK.[V]	1xOxidation [M3]																						-4.92324	-5.41074	-4.95979	-4.52075	-4.62167	-4.65896		0.497465	0.593635	3.00819
Q09666	Neuroblast differentiation-associated protein AHNAK OS=Homo sapiens OX=9606 GN=AHNAK PE=1 SV=2	[R].ISMSEVDLNVAAPK.[V]	1xOxidation [M3]		187935				30900.7			17.5199				14.9154			-1.23477				-2.07705		-5.07355	-1.23477	-4.94391	-4.41485	-4.68399	-2.07705		0.0254457	0.593635	3.00819
P62701	40S ribosomal protein S4, X isoform OS=Homo sapiens OX=9606 GN=RPS4X PE=1 SV=2	[R].LSNIFVIGK.[G]		328411	1283947	586694	280487	146778	271194		18.3251	20.2922	19.1622	18.0976	17.1633	18.049		1.11844	1.53751	1.44193	1.20114	0.684107	1.05656		1.11844	1.53751	1.44193	1.20114	0.684107	1.05656		-0.385356	-0.560202	0.967538
Q9UGY1	Nucleolar protein 12 OS=Homo sapiens OX=9606 GN=NOL12 PE=1 SV=1	[R].ISSLTASLHAHSR.[K]		160298	444536	126278	161416	70299.9	102448		17.2904	18.7619	16.9462	17.3004	16.1012	16.6445		0.0836944	0.00729576	-0.774075	0.403988	-0.377938	-0.347867		0.0836944	0.00729576	-0.774075	0.403988	-0.377938	-0.347867		0.120422	-0.386779	0.558282
P13645	Keratin, type I cytoskeletal 10 OS=Homo sapiens OX=9606 GN=KRT10 PE=1 SV=6	[R].ISSSKGSLGGGFSSGGFSGGSFSR.[G]			131024		50567.7		75105.1			16.9995		15.6259		16.1966			-1.75518		-1.27051		-0.795779		-4.86599	-1.75518	-4.82399	-1.27051	-4.6453	-0.795779		1.57786	-0.141331	0.518507
P05089	Arginase-1 OS=Homo sapiens OX=9606 GN=ARG1 PE=1 SV=2	[R].ISLVLGGDHSLAIGSISGHAR.[V]		16726.6	76943.5		24556.1	10627.8	52535.6		14.0299	16.2315		14.5838	13.3756	15.681		-3.17684	-2.52313		-2.31264	-3.10361	-1.3114		-3.17684	-2.52313	-4.75527	-2.31264	-3.10361	-1.3114		1.24253	1.74066	1.23371
Q14574	Desmocollin-3 OS=Homo sapiens OX=9606 GN=DSC3 PE=1 SV=3	[K].ISTDKETNEGVLSVVKPLNYEENR.[Q]			44322.1							15.4357							-3.31891						-4.90088	-3.31891	-4.76698	-4.53547	-4.74445	-4.50133		-0.264826	0.849653	0.92223
P07437	Tubulin beta chain OS=Homo sapiens OX=9606 GN=TUBB PE=1 SV=2	[R].ISVYYNEATGGK.[Y]		687016	2.67732e+06	1.20896e+06	801859	488449	761459		19.39	21.3524	20.2053	19.613	18.8978	19.5384		2.18328	2.59771	2.48502	2.71655	2.41867	2.54601		2.18328	2.59771	2.48502	2.71655	2.41867	2.54601		0.138408	-0.397563	0.718845
P07437	Tubulin beta chain OS=Homo sapiens OX=9606 GN=TUBB PE=1 SV=2	[R].ISVYYNEATGGKYVPR.[A]			59292.8		69947.2		28139.1			15.8556		16.094		14.7803			-2.89908		-0.802458		-2.21211		-5.0072	-2.89908	-4.75974	-0.802458	-4.8714	-2.21211		1.59335	-0.397563	0.718845
TGME49_309930-t26_1-p1	transcript=TGME49_309930-t26_1 | gene=TGME49_309930 | organism=Toxoplasma_gondii_ME49 | gene_product=melibiase subfamily protein | transcript_product=melibiase subfamily protein | location=TGME49_chrXI:909349-915530(-) | protein_length=982 | sequence_SO=chromosome | SO=protein_coding | is_pseudo=false	[R].LTEESAAYVQR.[E]					49170.3	55702.9	49909					15.5855	15.7655	15.607					-1.31094	-0.713708	-1.38539		-4.85516	-5.40138	-4.88698	-1.31094	-0.713708	-1.38539		3.91116	3.07128	4.30033
P35579	Myosin-9 OS=Homo sapiens OX=9606 GN=MYH9 PE=1 SV=4	[R].LTEMETLQSQLMAEK.[L]	1xOxidation [M4]		256697	133536						17.9697	17.0269						-0.784939	-0.693452					-4.81095	-0.784939	-0.693452	-4.56354	-4.793	-4.6055		-2.55757	-1.7311	75.0609
P35579	Myosin-9 OS=Homo sapiens OX=9606 GN=MYH9 PE=1 SV=4	[R].LTEMETLQSQLMAEK.[L]	2xOxidation [M4	67896.1	1.69425e+06	831913	13687.9	63377.8	161801		16.051	20.6922	19.6661	13.7406	15.9517	17.3039		-1.15566	1.93757	1.94575	-3.15582	-0.527482	0.311457		-1.15566	1.93757	1.94575	-3.15582	-0.527482	0.311457		-2.03317	-1.7311	75.0609
P02545	Prelamin-A/C OS=Homo sapiens OX=9606 GN=LMNA PE=1 SV=1	[R].ITESEEVVSR.[E]		120692	177004	59374.7	27056.2	34404.6	49082.3		16.881	17.4334	15.8576	14.7237	15.0703	15.5829		-0.325734	-1.32122	-1.86276	-2.17277	-1.40886	-1.40949		-0.325734	-1.32122	-1.86276	-2.17277	-1.40886	-1.40949		-0.493798	-0.90132	4.27226
P15924	Desmoplakin OS=Homo sapiens OX=9606 GN=DSP PE=1 SV=3	[K].ITNLTQQLEQASIVK.[K]			216477				43277.7			17.7239				15.4013			-1.03079				-1.59107		-5.06568	-1.03079	-4.73099	-4.69666	-4.61659	-1.59107		-0.0256198	0.231076	0.904463
Q04695	Keratin, type I cytoskeletal 17 OS=Homo sapiens OX=9606 GN=KRT17 PE=1 SV=2	[R].LSVEADINGLRR.[V]			472895			33497.4	46668.7			18.8512			15.0318	15.5102			0.0965148			-1.44741	-1.48223		-4.88067	0.0965148	-4.7706	-4.62559	-1.44741	-1.48223		0.666504	-0.144984	0.288677
P62241	40S ribosomal protein S8 OS=Homo sapiens OX=9606 GN=RPS8 PE=1 SV=2	[K].LTPEEEEILNK.[K]		555968	2.48111e+06	854434	160088	268056	387842		19.0846	21.2426	19.7046	17.2885	18.0322	18.5651		1.87794	2.48791	1.98429	0.392069	1.553	1.57271		1.87794	2.48791	1.98429	0.392069	1.553	1.57271		-0.944119	-1.26318	2.87779
P13647	Keratin, type II cytoskeletal 5 OS=Homo sapiens OX=9606 GN=KRT5 PE=1 SV=3	[R].ISISTSGGSFR.[N]		887755	6.11563e+06	1.03085e+06	1.37728e+06	951521	2.53271e+06		19.7598	22.5441	19.9754	20.3934	19.8599	21.2723		2.5531	3.78942	2.25508	3.49695	3.3807	4.27985		2.5531	3.78942	2.25508	3.49695	3.3807	4.27985		0.853301	0.091607	0.259862
P62829	60S ribosomal protein L23 OS=Homo sapiens OX=9606 GN=RPL23 PE=1 SV=1	[R].ISLGLPVGAVINCADNTGAK.[N]	1xCarbamidomethyl [C13]		327329	153950	67096.3		56133.3			18.3204	17.2321	16.0339		15.7766			-0.434263	-0.488215	-0.86249		-1.21583		-4.8554	-0.434263	-0.488215	-0.86249	-4.81786	-1.21583		-0.372766	-0.407139	0.806291
P13645	Keratin, type I cytoskeletal 10 OS=Homo sapiens OX=9606 GN=KRT10 PE=1 SV=6	[K].IRLENEIQTYR.[S]		307184	1.45204e+07	1.78109e+06	1.10309e+06	605166	2.57437e+06		18.2287	23.7916	20.7643	20.0731	19.207	21.2958		1.02204	5.03694	3.04401	3.17669	2.7278	4.30338		1.02204	5.03694	3.04401	3.17669	2.7278	4.30338		0.368294	-0.141331	0.518507
TGME49_203310-t26_1-p1	transcript=TGME49_203310-t26_1 | gene=TGME49_203310 | organism=Toxoplasma_gondii_ME49 | gene_product=dense granule protein GRA7 | transcript_product=dense granule protein GRA7 | location=TGME49_chrVIIa:2604424-2605134(+) | protein_length=236 | sequence_SO=chromosome | SO=protein_coding | is_pseudo=false	[R].IRNSDFFDGQAPVDSLRPTNAGVDSK.[G]					206773		35812.5					17.6577		15.1282					0.76125		-1.86423		-4.85152	-5.38955	-4.93711	0.76125	-4.83473	-1.86423		3.08016	3.58578	18.7485
P35580	Myosin-10 OS=Homo sapiens OX=9606 GN=MYH10 PE=1 SV=3	[R].IRQLEEEKNSLQEQQEEEEEAR.[K]		25620.5	330478	82557.1					14.645	18.3342	16.3331					-2.56169	-0.420451	-1.38722					-2.56169	-0.420451	-1.38722	-4.62884	-4.67308	-4.49537		-3.14264	-1.95045	59.9637
P04264	Keratin, type II cytoskeletal 1 OS=Homo sapiens OX=9606 GN=KRT1 PE=1 SV=6	[R].LRSEIDNVKK.[Q]		173763	6.77442e+06	640186	310045	590256	701602		17.4068	22.6917	19.2881	18.2421	19.171	19.4203		0.200056	3.93702	1.56781	1.34568	2.69181	2.42789		0.200056	3.93702	1.56781	1.34568	2.69181	2.42789		0.253498	-0.0837483	0.431184
TGME49_229010-t26_1-p1	transcript=TGME49_229010-t26_1 | gene=TGME49_229010 | organism=Toxoplasma_gondii_ME49 | gene_product=rhoptry neck protein RON4 | transcript_product=rhoptry neck protein RON4 | location=TGME49_chrVIII:20265-26992(+) | protein_length=984 | sequence_SO=chromosome | SO=protein_coding | is_pseudo=false	[R].ISAPLKQSDTLIEESTSK.[T]					147106	37782.7	98658.7					17.1665	15.2054	16.5902					0.270063	-1.27373	-0.402243		-5.05039	-5.25569	-4.85803	0.270063	-1.27373	-0.402243		4.58607	3.11196	3.19765
O75340	Programmed cell death protein 6 OS=Homo sapiens OX=9606 GN=PDCD6 PE=1 SV=1	[R].LSDQFHDILIR.[K]			66527.2		5.615e+06	272770	4.20856e+06			16.0217		22.4209	18.0573	22.0049			-2.73299		5.52442	1.57815	5.01249		-4.8538	-2.73299	-4.86687	5.52442	1.57815	5.01249		8.18957	5.79024	17.3889
P08670	Vimentin OS=Homo sapiens OX=9606 GN=VIM PE=1 SV=4	[R].ISLPLPNFSSLNLR.[E]			451696	150314	13359.4		40734.4			18.785	17.1976	13.7056		15.314			0.0303458	-0.522698	-3.19086		-1.67844		-4.8651	0.0303458	-0.522698	-3.19086	-4.85167	-1.67844		-1.45451	-1.45396	18.1104
Q15121	Astrocytic phosphoprotein PEA-15 OS=Homo sapiens OX=9606 GN=PEA15 PE=1 SV=2	[K].ISEEDELDTK.[L]			75403	49738.8	18703.3		16773.6			16.2023	15.6021	14.191		14.0339			-2.55231	-2.11824	-2.70543		-2.9585		-5.01671	-2.55231	-2.11824	-2.70543	-4.86204	-2.9585		-0.279568	-0.279568	0.290335
Q13885	Tubulin beta-2A chain OS=Homo sapiens OX=9606 GN=TUBB2A PE=1 SV=1 Tubulin beta chain OS=Homo sapiens OX=9606 GN=TUBB PE=1 SV=2 Tubulin beta-4B chain OS=Homo sapiens OX=9606 GN=TUBB4B PE=1 SV=1 Tubulin beta-2B chain OS=Homo sapiens OX=9606 GN=TUBB2B PE=1 SV=1	[R].ISEQFTAMFR.[R]	1xOxidation [M8]	85853.8	899566	375820	138809	45948.1	108760		16.3896	19.7789	18.5197	17.0827	15.4877	16.7308		-0.817108	1.02422	0.799363	0.186308	-0.991456	-0.261611		-0.817108	1.02422	0.799363	0.186308	-0.991456	-0.261611		-0.691079	-0.352122	1.0173
Q7L014	Probable ATP-dependent RNA helicase DDX46 OS=Homo sapiens OX=9606 GN=DDX46 PE=1 SV=2	[R].ISEYSEAAITIR.[G]							39490.2							15.2692							-1.72319		-4.90255	-5.38813	-4.88479	-4.63623	-4.90272	-1.72319		1.30444	1.31702	0.962138
Q9UBV8	Peflin OS=Homo sapiens OX=9606 GN=PEF1 PE=1 SV=1	[R].LSFEDFVTMTASR.[M]	1xOxidation [M9]	16998.1	24328.2		1.02375e+06	37150.9	599649		14.0531	14.5703		19.9654	15.1811	19.1938		-3.15362	-4.1843		3.06899	-1.29806	2.20136		-3.15362	-4.1843	-4.76626	3.06899	-1.29806	2.20136		5.35882	5.13604	7.9323
TGME49_229480-t26_1-p1	transcript=TGME49_229480-t26_1 | gene=TGME49_229480 | organism=Toxoplasma_gondii_ME49 | gene_product=calcium binding protein precursor, putative | transcript_product=calcium binding protein precursor, putative | location=TGME49_chrVIII:292754-295302(-) | protein_length=335 | sequence_SO=chromosome | SO=protein_coding | is_pseudo=false	[K].LSGEKLAELMQMDVK.[D]	2xOxidation [M10			14347.3	290095	54946.5	69002.9				13.8085	18.1462	15.7457	16.0744				-3.91183	1.24973	-0.733433	-0.918033		-4.79727	-5.12695	-3.91183	1.24973	-0.733433	-0.918033		4.47811	4.48727	20.0107
P62805	Histone H4 OS=Homo sapiens OX=9606 GN=HIST1H4A PE=1 SV=2	[R].ISGLIYEETR.[G]		11437919	7453282	1.97184e+06	278750	413094	1.19982e+06		23.4473	22.8294	20.9111	18.0886	18.6561	20.1944		6.24062	4.0748	3.19079	1.19218	2.17694	3.20198		6.24062	4.0748	3.19079	1.19218	2.17694	3.20198		-2.3117	-1.9663	8.7918
Q02413	Desmoglein-1 OS=Homo sapiens OX=9606 GN=DSG1 PE=1 SV=2	[R].ISGVGIDQPPYGIFVINQK.[T]			102082				28459.2			16.6394				14.7966			-2.11528				-2.19579		-4.93418	-2.11528	-4.83963	-4.45159	-4.89095	-2.19579		0.116919	0.349231	0.963474
Q9Y608	Leucine-rich repeat flightless-interacting protein 2 OS=Homo sapiens OX=9606 GN=LRRFIP2 PE=1 SV=1	[K].LSKAEQDITTLEQSISR.[L]			180668	33119.9						17.463	15.0154						-1.29167	-2.70491					-4.84542	-1.29167	-2.70491	-4.59209	-4.77351	-4.40523		-1.64294	-1.52753	6.05819
TGME49_207840-t26_1-p1	transcript=TGME49_207840-t26_1 | gene=TGME49_207840 | organism=Toxoplasma_gondii_ME49 | gene_product=ribosomal protein RPS17 | transcript_product=ribosomal protein RPS17 | location=TGME49_chrIb:327322-329024(-) | protein_length=132 | sequence_SO=chromosome | SO=protein_coding | is_pseudo=false	[K].ISEEVAVIPSKR.[M]		42654.7		22813.6	37820.7	40823.9	52527.2		15.3804		14.4776	15.2069	15.3171	15.6808		-1.82629		-3.24271	-1.68955	-1.16205	-1.31163		-1.82629	-5.33349	-3.24271	-1.68955	-1.16205	-1.31163		2.07976	0.543804	0.7024
P62241	40S ribosomal protein S8 OS=Homo sapiens OX=9606 GN=RPS8 PE=1 SV=2	[K].LTPEEEEILNKK.[R]		29265.2	230155	54367.7		10139.6	20045.3		14.8369	17.8122	15.7305		13.3077	14.291		-2.36981	-0.942397	-1.98986		-3.17145	-2.70143		-2.36981	-0.942397	-1.98986	-4.40788	-3.17145	-2.70143		-1.65957	-1.26318	2.87779
P11021	Endoplasmic reticulum chaperone BiP OS=Homo sapiens OX=9606 GN=HSPA5 PE=1 SV=2	[R].ITPSYVAFTPEGER.[L]			308947	139141	71059.5		139010			18.237	17.0862	16.1167		17.0848			-0.517647	-0.634137	-0.779696		0.0924292		-4.89776	-0.517647	-0.634137	-0.779696	-4.73538	0.0924292		0.208966	-0.218298	0.708121
P62277	40S ribosomal protein S13 OS=Homo sapiens OX=9606 GN=RPS13 PE=1 SV=2	[K].LTSDDVKEQIYK.[L]		442656	2.15091e+06	545267	277447	202572	220824		18.7558	21.0365	19.0566	18.0819	17.6281	17.7525		1.54912	2.28187	1.33628	1.18542	1.14891	0.760136		1.54912	2.28187	1.33628	1.18542	1.14891	0.760136		-0.690938	-0.541708	1.13284
P11021	Endoplasmic reticulum chaperone BiP OS=Homo sapiens OX=9606 GN=HSPA5 PE=1 SV=2	[K].LYGSAGPPPTGEEDTAEKDEL.[-]			127834	87533	38112.8		52510.3			16.9639	16.4175	15.218		15.6803			-1.79073	-1.30278	-1.67845		-1.31209		-5.06844	-1.79073	-1.30278	-1.67845	-4.61329	-1.31209		0.186042	-0.218298	0.708121
P02751	Fibronectin OS=Homo sapiens OX=9606 GN=FN1 PE=1 SV=4	[K].IYLYTLNDNAR.[S]		409239	930086	324447	116567		269134		18.6426	19.827	18.3076	16.8308		18.038		1.43588	1.07236	0.587303	-0.0656372		1.04556		1.43588	1.07236	0.587303	-0.0656372	-4.69512	1.04556		-2.27025	-1.69425	11.343
O14773	Tripeptidyl-peptidase 1 OS=Homo sapiens OX=9606 GN=TPP1 PE=1 SV=2	[R].LYQQHGAGLFDVTR.[G]			87866.9	34453.7						16.423	15.0724						-2.33161	-2.64795					-4.94791	-2.33161	-2.64795	-4.55724	-4.67715	-4.48665		-1.26452	-1.37151	0.998864
P62899	60S ribosomal protein L31 OS=Homo sapiens OX=9606 GN=RPL31 PE=1 SV=1	[K].LYTLVTYVPVTTFK.[N]			286694	151709			42671.7			18.1292	17.2109			15.381			-0.625492	-0.509377			-1.61141		-4.99254	-0.625492	-0.509377	-4.59788	-4.81896	-1.61141		-1.63361	-1.2697	1.41523
P31944	Caspase-14 OS=Homo sapiens OX=9606 GN=CASP14 PE=1 SV=2	[R].MAEAELVQEGK.[A]		29622.3	224791	57215.4	10873.3	30102	72280.1		14.8544	17.7782	15.8041	13.4085	14.8776	16.1413		-2.35231	-0.976423	-1.9162	-3.48794	-1.6016	-0.851092		-2.35231	-0.976423	-1.9162	-3.48794	-1.6016	-0.851092		-0.2319	1.51805	2.68598
P31944	Caspase-14 OS=Homo sapiens OX=9606 GN=CASP14 PE=1 SV=2	[R].MAEAELVQEGK.[A]	1xOxidation [M1]	20292.9	125690	22140.3	12616.2	133788	82873.8		14.3087	16.9395	14.4344	13.623	17.0296	16.3386		-2.89802	-1.81513	-3.28593	-3.27345	0.550413	-0.653774		-2.89802	-1.81513	-3.28593	-3.27345	0.550413	-0.653774		1.54076	1.51805	2.68598
P46776	60S ribosomal protein L27a OS=Homo sapiens OX=9606 GN=RPL27A PE=1 SV=2	[K].LWTLVSEQTR.[V]		119345	2.0588e+06	1.00893e+06	116782	119296	376456		16.8648	20.9734	19.9444	16.8335	16.8642	18.5221		-0.341925	2.21873	2.22408	-0.0629781	0.38501	1.52972		-0.341925	2.21873	2.22408	-0.0629781	0.38501	1.52972		-0.749709	-0.721581	1.30584
P08670	Vimentin OS=Homo sapiens OX=9606 GN=VIM PE=1 SV=4	[K].MALDIEIATYR.[K]	1xOxidation [M1]	102524	3218610	871041		36610.3			16.6456	21.618	19.7324		15.16			-0.561097	2.86336	2.01206		-1.31921			-0.561097	2.86336	2.01206	-4.54287	-1.31921	-4.42572		-4.86738	-1.45396	18.1104
P62753	40S ribosomal protein S6 OS=Homo sapiens OX=9606 GN=RPS6 PE=1 SV=1	[R].MATEVAADALGEEWKGYVVR.[I]	1xOxidation [M1]		161118							17.2978							-1.45689						-5.07497	-1.45689	-4.75997	-4.61897	-4.7813	-4.66812		-0.925518	-0.930869	2.99966
P30101	Protein disulfide-isomerase A3 OS=Homo sapiens OX=9606 GN=PDIA3 PE=1 SV=4	[K].MDATANDVPSPYEVR.[G]	1xOxidation [M1]		60356.7	37982.9		14851.3	31282.7			15.8812	15.2131		13.8583	14.9331			-2.87342	-2.50726		-2.62087	-2.05933		-4.90976	-2.87342	-2.50726	-4.64214	-2.62087	-2.05933		0.322701	-0.0304122	0.0533733
O43852	Calumenin OS=Homo sapiens OX=9606 GN=CALU PE=1 SV=2	[K].MDKEETKDWILPSDYDHAEAEAR.[H]	1xOxidation [M1]		208674		15734.2		976790			17.6709		13.9416		19.8977			-1.08375		-2.95482		2.90529		-4.7973	-1.08375	-4.8516	-2.95482	-4.82684	2.90529		1.95209	0.214061	0.357735
P63104	14-3-3 protein zeta/delta OS=Homo sapiens OX=9606 GN=YWHAZ PE=1 SV=1	[-].MDKNELVQK.[A]	1xAcetyl [N-Term]		63032.3	48963.9	8071.73		22716.6			15.9438	15.5794	12.9787		14.4715			-2.81084	-2.14089	-3.91777		-2.52094		-5.07849	-2.81084	-2.14089	-3.91777	-4.80564	-2.52094		-0.404714	-0.2884	0.402571
P07237	Protein disulfide-isomerase OS=Homo sapiens OX=9606 GN=P4HB PE=1 SV=3	[K].MDSTANEVEAVK.[V]			14369.5							13.8107							-4.94393						-4.94869	-4.94393	-4.88064	-4.63497	-4.8299	-4.60458		0.234601	-0.212678	0.355199
P62753	40S ribosomal protein S6 OS=Homo sapiens OX=9606 GN=RPS6 PE=1 SV=1	[R].MATEVAADALGEEWK.[G]	1xOxidation [M1]	35587.9	822192	346551	38255.9	27486.6	137383		15.1191	19.6491	18.4027	15.2234	14.7464	17.0678		-2.0876	0.894471	0.682388	-1.67304	-1.73273	0.075445		-2.0876	0.894471	0.682388	-1.67304	-1.73273	0.075445		-0.93986	-0.930869	2.99966
P60709	Actin, cytoplasmic 1 OS=Homo sapiens OX=9606 GN=ACTB PE=1 SV=1 Actin, alpha skeletal muscle OS=Homo sapiens OX=9606 GN=ACTA1 PE=1 SV=1	[K].IWHHTFYNELR.[V]		180144	4.59903e+06	1.60026e+06	237218	98227	505635		17.4588	22.1329	20.6099	17.8559	16.5838	18.9477		0.252091	3.37825	2.88955	0.959416	0.10466	1.95533		0.252091	3.37825	2.88955	0.959416	0.10466	1.95533		-1.16683	-1.70874	12.7917
P48047	ATP synthase subunit O, mitochondrial OS=Homo sapiens OX=9606 GN=ATP5PO PE=1 SV=1	[K].LVRPPVQVYGIEGR.[Y]			136191	47850.6	31796.3					17.0553	15.5463	14.9566					-1.69938	-2.17407	-1.93987				-4.87738	-1.69938	-2.17407	-1.93987	-4.71535	-4.62583		-0.843408	-0.9647	1.34484
P21333	Filamin-A OS=Homo sapiens OX=9606 GN=FLNA PE=1 SV=4	[R].LTVSSLQESGLK.[V]			153672	98653.2		21023.7	64774.6			17.2295	16.5901		14.3597	15.9831			-1.52515	-1.13024		-2.11944	-1.00926		-4.94597	-1.52515	-1.13024	-4.58207	-2.11944	-1.00926		-0.0364696	-0.801463	6.54648
P02751	Fibronectin OS=Homo sapiens OX=9606 GN=FN1 PE=1 SV=4	[R].ITYGETGGNSPVQEFTVPGSK.[S]		80018.5	255813	115911			59121.9		16.288	17.9647	16.8227			15.8514		-0.918657	-0.789916	-0.897659			-1.141		-0.918657	-0.789916	-0.897659	-4.45503	-4.67819	-1.141		-2.556	-1.69425	11.343
P50914	60S ribosomal protein L14 OS=Homo sapiens OX=9606 GN=RPL14 PE=1 SV=4	[K].LVAIVDVIDQNR.[A]			87602.2	40133.8		11215.6	41434.8			16.4187	15.2925		13.4532	15.3386			-2.33597	-2.42779		-3.02596	-1.65385		-4.97907	-2.33597	-2.42779	-4.62718	-3.02596	-1.65385		0.145278	0.145278	0.134552
TGME49_270240-t26_1-p1	transcript=TGME49_270240-t26_1 | gene=TGME49_270240 | organism=Toxoplasma_gondii_ME49 | gene_product=MAG1 | transcript_product=MAG1 | location=TGME49_chrVIII:5312269-5313737(+) | protein_length=452 | sequence_SO=chromosome | SO=protein_coding | is_pseudo=false	[R].LVDLIKDNQR.[R]					1.57559e+06	579465	617087					20.5875	19.1444	19.2351					3.69102	2.66519	2.24271		-5.02166	-5.30163	-4.73952	3.69102	2.66519	2.24271		7.88725	4.92705	34.9346
Q15293	Reticulocalbin-1 OS=Homo sapiens OX=9606 GN=RCN1 PE=1 SV=1	[K].IVDRIDNDGDGFVTTEELK.[T]			696216	210300			48637.2			19.4092	17.6821			15.5698			0.65453	-0.0382286			-1.42263		-5.03687	0.65453	-0.0382286	-4.47655	-4.76234	-1.42263		-2.08032	-0.560595	0.968335
TGME49_255660-t26_1-p1	transcript=TGME49_255660-t26_1 | gene=TGME49_255660 | organism=Toxoplasma_gondii_ME49 | gene_product=EF hand domain-containing protein | transcript_product=EF hand domain-containing protein | location=TGME49_chrVIIb:4749474-4750240(-) | protein_length=149 | sequence_SO=chromosome | SO=protein_coding | is_pseudo=false	[R].LVDSNQDGLLTLAEYR.[E]					27291.5		63717.3					14.7362		15.9594					-2.16027		-1.033		-4.96105	-5.25566	-4.86624	-2.16027	-4.61778	-1.033		2.42397	3.63239	2.11968
P47929	Galectin-7 OS=Homo sapiens OX=9606 GN=LGALS7 PE=1 SV=2	[R].LVEVGGDVQLDSVR.[I]		19554.7		75874.1		15533.9	196268		14.2552		16.2113		13.9231	17.5825		-2.95148		-1.509		-2.55604	0.590062		-2.95148	-5.25591	-1.509	-4.43177	-2.55604	0.590062		1.10622	0.959841	1.05243
P35580	Myosin-10 OS=Homo sapiens OX=9606 GN=MYH10 PE=1 SV=3	[R].IVGLDQVTGMTETAFGSAYK.[T]	1xOxidation [M10]		218478	86804.5						17.7371	16.4055						-1.01752	-1.31484					-4.83459	-1.01752	-1.31484	-4.51384	-4.84752	-4.62556		-2.27332	-1.95045	59.9637
P21333	Filamin-A OS=Homo sapiens OX=9606 GN=FLNA PE=1 SV=4	[K].IVGPSGAAVPCKVEPGLGADNSVVR.[F]	1xCarbamidomethyl [C11]		91996.9	30451.3						16.4893	14.8942						-2.26535	-2.8261					-4.88326	-2.26535	-2.8261	-4.61154	-4.87266	-4.605		-1.37149	-0.801463	6.54648
Q9Y6C2	EMILIN-1 OS=Homo sapiens OX=9606 GN=EMILIN1 PE=1 SV=3	[R].LVGSGLHTVEAAGEAR.[Q]		571922	371852	136175	71497.3	63131.9	89308.8		19.1255	18.5044	17.0551	16.1256	15.9461	16.4465		1.91875	-0.250277	-0.665221	-0.770835	-0.533092	-0.545887		1.91875	-0.250277	-0.665221	-0.770835	-0.533092	-0.545887		-0.951023	-1.37014	6.27959
P67936	Tropomyosin alpha-4 chain OS=Homo sapiens OX=9606 GN=TPM4 PE=1 SV=3 Tropomyosin beta chain OS=Homo sapiens OX=9606 GN=TPM2 PE=1 SV=1	[K].LVILEGELER.[AS]		77655.7	5603452	1.6481e+06	186850	56270	552207		16.2448	22.4179	20.6524	17.5115	15.7801	19.0749		-0.961899	3.66324	2.93205	0.615086	-0.699095	2.08245		-0.961899	3.66324	2.93205	0.615086	-0.699095	2.08245		-1.21165	-1.11715	10.5206
P67936	Tropomyosin alpha-4 chain OS=Homo sapiens OX=9606 GN=TPM4 PE=1 SV=3	[K].LVILEGELERAEER.[A]			2.69115e+06	788084	49427.3		314881			21.3598	19.588	15.593		18.2644			2.60515	1.86767	-1.30342		1.27204		-4.82582	2.60515	1.86767	-1.30342	-4.81671	1.27204		-1.49836	-1.11715	10.5206
P09493	Tropomyosin alpha-1 chain OS=Homo sapiens OX=9606 GN=TPM1 PE=1 SV=2	[K].LVIIESDLERAEER.[A]		17989.8	645690	170254	26576.1	16431.8	72577.2		14.1349	19.3005	17.3773	14.6978	14.0042	16.1472		-3.07181	0.545838	-0.342992	-2.1986	-2.47497	-0.845173		-3.07181	0.545838	-0.342992	-2.1986	-2.47497	-0.845173		-0.883258	-0.922806	4.58781
P16070	CD44 antigen OS=Homo sapiens OX=9606 GN=CD44 PE=1 SV=3	[K].LVINSGNGAVEDR.[K]		32611.5	178507	79599.8	16872.8	14931.8	14831.6		14.9931	17.4456	16.2805	14.0424	13.8661	13.8564		-2.21361	-1.30903	-1.43984	-2.85402	-2.61308	-3.13601		-2.21361	-1.30903	-1.43984	-2.85402	-2.61308	-3.13601		-1.21354	-0.732672	1.32979
O00264	Membrane-associated progesterone receptor component 1 OS=Homo sapiens OX=9606 GN=PGRMC1 PE=1 SV=3	[K].IVRGDQPAASGDSDDDEPPPLPR.[L]			32890.8							15.0054							-3.74925						-4.81272	-3.74925	-4.91611	-4.57326	-4.6481	-4.42121		-0.0548294	-0.259334	0.182504
P13645	Keratin, type I cytoskeletal 10 OS=Homo sapiens OX=9606 GN=KRT10 PE=1 SV=6	[K].NHEEEMKDLR.[N]	1xOxidation [M6]	142393	4.28817e+06			393733	622517		17.1195	22.0319			18.5869	19.2478		-0.0871833	3.27728			2.10768	2.25535		-0.0871833	3.27728	-4.74611	-4.67169	2.10768	2.25535		0.415786	-0.141331	0.518507
P02545	Prelamin-A/C OS=Homo sapiens OX=9606 GN=LMNA PE=1 SV=1	[R].IRIDSLSAQLSQLQK.[Q]			39120.3							15.2556							-3.49902						-4.92123	-3.49902	-4.75987	-4.54595	-4.686	-4.45471		-0.168851	-0.90132	4.27226
P02533	Keratin, type I cytoskeletal 14 OS=Homo sapiens OX=9606 GN=KRT14 PE=1 SV=4 Keratin, type I cytoskeletal 17 OS=Homo sapiens OX=9606 GN=KRT17 PE=1 SV=2	[K].NHEEEMNALR.[G]			237604							17.8582							-0.896447						-5.01811	-0.896447	-4.89382	-4.50541	-4.8137	-4.54274		-1.01782	0.0182555	0.0639849
P25311	Zinc-alpha-2-glycoprotein OS=Homo sapiens OX=9606 GN=AZGP1 PE=1 SV=2	[K].QKWEAEPVYVQR.[A]			64510.7				77024.8			15.9773				16.233			-2.77739				-0.759367		-4.99169	-2.77739	-4.83275	-4.70015	-4.70673	-0.759367		0.811866	0.773282	0.832206
P19474	E3 ubiquitin-protein ligase TRIM21 OS=Homo sapiens OX=9606 GN=TRIM21 PE=1 SV=1	[R].QLANMVNNLK.[E]		42854.6	1075575	685911	80963.4		132266		15.3872	20.0367	19.3877	16.305		17.0131		-1.81954	1.28203	1.66734	-0.591454		0.0206798		-1.81954	1.28203	1.66734	-0.591454	-4.88497	0.0206798		-2.19519	-1.30475	4.32229
P19474	E3 ubiquitin-protein ligase TRIM21 OS=Homo sapiens OX=9606 GN=TRIM21 PE=1 SV=1	[R].QLANMVNNLK.[E]	1xOxidation [M5]	391468	732356	428661	117381	170604	118542		18.5785	19.4822	18.7095	16.8408	17.3803	16.855		1.37183	0.72754	0.989157	-0.0555976	0.901118	-0.137362		1.37183	0.72754	0.989157	-0.0555976	0.901118	-0.137362		-0.793457	-1.30475	4.32229
Q9H444	Charged multivesicular body protein 4b OS=Homo sapiens OX=9606 GN=CHMP4B PE=1 SV=1	[K].QLAQIDGTLSTIEFQR.[E]			137229		477263		450881			17.0662		18.8644		18.7824			-1.68842		1.96799		1.78998		-4.91924	-1.68842	-4.78173	1.96799	-4.64712	1.78998		3.50008	5.60781	13.6126
P35579	Myosin-9 OS=Homo sapiens OX=9606 GN=MYH9 PE=1 SV=4	[K].QIATLHAQVADMK.[K]			3.65802e+06	1.69091e+06	53632.8		238278			21.8026	20.6894	15.7108		17.8623			3.04798	2.96905	-1.18561		0.869884		-5.06084	3.04798	2.96905	-1.18561	-4.70789	0.869884		-1.99327	-1.7311	75.0609
P35579	Myosin-9 OS=Homo sapiens OX=9606 GN=MYH9 PE=1 SV=4	[K].QIATLHAQVADMK.[K]	1xOxidation [M12]	213656	3.37501e+06	1.375e+06	119390	259705	324781		17.7049	21.6865	20.391	16.8653	17.9865	18.3091		0.498231	2.93182	2.67068	-0.0311105	1.50734	1.31671		0.498231	2.93182	2.67068	-0.0311105	1.50734	1.31671		-1.10259	-1.7311	75.0609
P35579	Myosin-9 OS=Homo sapiens OX=9606 GN=MYH9 PE=1 SV=4	[K].QIATLHAQVADMKK.[K]			423673	133311			13048.4			18.6926	17.0244			13.6716			-0.0620545	-0.695884			-3.32082		-4.87964	-0.0620545	-0.695884	-4.55303	-4.76245	-3.32082		-2.33291	-1.7311	75.0609
P07910	Heterogeneous nuclear ribonucleoproteins C1/C2 OS=Homo sapiens OX=9606 GN=HNRNPC PE=1 SV=4	[K].QKVDSLLENLEK.[I]			123767							16.9173							-1.83738						-4.97285	-1.83738	-4.84487	-4.53618	-4.66358	-4.50464		-0.683098	-0.56118	0.85365
P35579	Myosin-9 OS=Homo sapiens OX=9606 GN=MYH9 PE=1 SV=4	[K].QIATLHAQVADMKK.[K]	1xOxidation [M12]	80678.8	991832	301966	16656.8	77313.4	90481.8		16.2999	19.9197	18.204	14.0238	16.2384	16.4653		-0.906801	1.16509	0.483704	-2.87261	-0.240742	-0.527062		-0.906801	1.16509	0.483704	-2.87261	-0.240742	-0.527062		-1.4608	-1.7311	75.0609
P09493	Tropomyosin alpha-1 chain OS=Homo sapiens OX=9606 GN=TPM1 PE=1 SV=2	[K].QLEDELVSLQK.[K]		24484.7	767227	229392	48558.3	35367.7	116317		14.5796	19.5493	17.8075	15.5674	15.1101	16.8277		-2.62711	0.794649	0.0871355	-1.32901	-1.36903	-0.164697		-2.62711	0.794649	0.0871355	-1.32901	-1.36903	-0.164697		-0.372469	-0.922806	4.58781
P09493	Tropomyosin alpha-1 chain OS=Homo sapiens OX=9606 GN=TPM1 PE=1 SV=2	[K].QLEDELVSLQKK.[L]			110617							16.7552							-1.99943						-4.98622	-1.99943	-4.71159	-4.68871	-4.81784	-4.61922		-0.809507	-0.922806	4.58781
P35579	Myosin-9 OS=Homo sapiens OX=9606 GN=MYH9 PE=1 SV=4	[R].QLEEAEEEAQR.[A]		553253	8.71534e+06	3.94698e+06	336023	399288	971706		19.0776	23.0551	21.9123	18.3582	18.6071	19.8902		1.87088	4.30048	4.192	1.46176	2.1279	2.89776		1.87088	4.30048	4.192	1.46176	2.1279	2.89776		-1.29198	-1.7311	75.0609
P35580	Myosin-10 OS=Homo sapiens OX=9606 GN=MYH10 PE=1 SV=3	[R].QLEEAEEEATR.[A]		206656	2.52789e+06	1.0673e+06	79073.4	98818.9	210949		17.6569	21.2695	20.0255	16.2709	16.5925	17.6865		0.450167	2.51486	2.30521	-0.62553	0.113326	0.69413		0.450167	2.51486	2.30521	-0.62553	0.113326	0.69413		-1.6961	-1.95045	59.9637
P35580	Myosin-10 OS=Homo sapiens OX=9606 GN=MYH10 PE=1 SV=3	[R].QLEEEKNSLQEQQEEEEEAR.[K]			411247	162950			25996.9			18.6496	17.3141			14.666			-0.104998	-0.406252			-2.32635		-4.98108	-0.104998	-0.406252	-4.67099	-4.65263	-2.32635		-2.05254	-1.95045	59.9637
P35580	Myosin-10 OS=Homo sapiens OX=9606 GN=MYH10 PE=1 SV=3	[R].QLEEEKNSLQEQQEEEEEARK.[N]			367587	131516						18.4877	17.0049						-0.266919	-0.71544					-4.92399	-0.266919	-0.71544	-4.65242	-4.90731	-4.45364		-2.70234	-1.95045	59.9637
P07951	Tropomyosin beta chain OS=Homo sapiens OX=9606 GN=TPM2 PE=1 SV=1	[K].QLEEEQQALQK.[K]		52430.7	513653	240168	42610.6	65860.4	120385		15.6781	18.9704	17.8737	15.3789	16.0071	16.8773		-1.52858	0.215791	0.153361	-1.51751	-0.472048	-0.115109		-1.52858	0.215791	0.153361	-1.51751	-0.472048	-0.115109		-0.31508	-0.804096	2.00372
P42766	60S ribosomal protein L35 OS=Homo sapiens OX=9606 GN=RPL35 PE=1 SV=2	[K].QLDDLKVELSQLR.[V]		1.04956e+06	4.90517e+07	1.5888e+07	3.29727e+06	311418	6.7265e+06		20.0014	25.5478	23.9214	21.6528	18.2485	22.6814		2.79465	6.79315	6.20112	4.75641	1.76932	5.68902		2.79465	6.79315	6.20112	4.75641	1.76932	5.68902		-1.19139	-0.538575	1.2191
P07951	Tropomyosin beta chain OS=Homo sapiens OX=9606 GN=TPM2 PE=1 SV=1	[K].QLEEEQQALQKK.[L]			87644.4							16.4194							-2.33527						-5.0594	-2.33527	-4.68359	-4.47804	-4.87378	-4.44528		-0.572948	-0.804096	2.00372
P35579	Myosin-9 OS=Homo sapiens OX=9606 GN=MYH9 PE=1 SV=4	[R].QKHSQAVEELAEQLEQTKR.[V]			6.54104e+06	2.1388e+06	196127		557186			22.6411	21.0284	17.5814		19.0878			3.88644	3.30805	0.684992		2.0954		-4.93975	3.88644	3.30805	0.684992	-4.86481	2.0954		-1.44639	-1.7311	75.0609
P08670	Vimentin OS=Homo sapiens OX=9606 GN=VIM PE=1 SV=4	[R].QDVDNASLAR.[L]		330450	1.68797e+06	575470	130463	142367	221993		18.3341	20.6869	19.1344	16.9933	17.1193	17.7602		1.12737	1.93221	1.41406	0.096842	0.640083	0.767755		1.12737	1.93221	1.41406	0.096842	0.640083	0.767755		-0.989656	-1.45396	18.1104
TGME49_215220-t26_1-p1	transcript=TGME49_215220-t26_1 | gene=TGME49_215220 | organism=Toxoplasma_gondii_ME49 | gene_product=hypothetical protein | transcript_product=hypothetical protein | location=TGME49_chrX:6825368-6827843(+) | protein_length=629 | sequence_SO=chromosome | SO=protein_coding | is_pseudo=false	[R].QEDGSFNLQSIQR.[I]					54802.4	37859.8	84081.2					15.742	15.2084	16.3595					-1.15449	-1.27079	-0.632906		-4.94709	-5.17556	-4.91639	-1.15449	-1.27079	-0.632906		3.99362	4.7584	12.117
P35580	Myosin-10 OS=Homo sapiens OX=9606 GN=MYH10 PE=1 SV=3	[R].QEEELQAKDEELLK.[V]		22500.5	743716	186170			30701.5		14.4577	19.5044	17.5063			14.906		-2.74903	0.749748	-0.214059			-2.08638		-2.74903	0.749748	-0.214059	-4.4762	-4.65413	-2.08638		-3.00112	-1.95045	59.9637
P35579	Myosin-9 OS=Homo sapiens OX=9606 GN=MYH9 PE=1 SV=4	[R].QEEEMMAKEEELVK.[V]	1xOxidation [M]		202131	33666.8						17.6249	15.039						-1.12971	-2.68128					-4.91238	-1.12971	-2.68128	-4.56516	-4.89743	-4.67346		-1.80422	-1.7311	75.0609
Q02413	Desmoglein-1 OS=Homo sapiens OX=9606 GN=DSG1 PE=1 SV=2	[R].QEPSDSPMFIINR.[N]	1xOxidation [M8]	16766	152746	24794.2	17970.5	20909.6	109225		14.0332	17.2208	14.5977	14.1333	14.3519	16.7369		-3.17346	-1.53387	-3.12261	-2.7631	-2.12729	-0.255459		-3.17346	-1.53387	-3.12261	-2.7631	-2.12729	-0.255459		0.894694	0.349231	0.963474
P01876	Immunoglobulin heavy constant alpha 1 OS=Homo sapiens OX=9606 GN=IGHA1 PE=1 SV=2	[R].QEPSQGTTTFAVTSILR.[V]			57803.7				35045.1			15.8189				15.0969			-2.93577				-1.89548		-4.86022	-2.93577	-4.8393	-4.5476	-4.87225	-1.89548		0.439991	0.536322	0.390322
P35580	Myosin-10 OS=Homo sapiens OX=9606 GN=MYH10 PE=1 SV=3	[K].QEVMISDLEER.[L]	1xOxidation [M4]		89598.1	31372.9						16.4512	14.9372						-2.30346	-2.78309					-4.96243	-2.30346	-2.78309	-4.63595	-4.68269	-4.64643		-1.30536	-1.95045	59.9637
Q9NYL9	Tropomodulin-3 OS=Homo sapiens OX=9606 GN=TMOD3 PE=1 SV=1	[K].QKPVQTFTEEK.[V]		133516	2.41311e+06	792848	71072.1	47295.9	208176		17.0267	21.2025	19.5967	16.117	15.5294	17.6674		-0.180051	2.44781	1.87636	-0.779441	-0.949744	0.67504		-0.180051	2.44781	1.87636	-0.779441	-0.949744	0.67504		-1.73276	-1.8006	9.86752
P60709	Actin, cytoplasmic 1 OS=Homo sapiens OX=9606 GN=ACTB PE=1 SV=1	[K].QEYDESGPSIVHR.[K]		58468	675543	385848	10244.6	44281.9	47419		15.8354	19.3657	18.5577	13.3226	15.4344	15.5332		-1.37134	0.611042	0.837352	-3.57386	-1.04474	-1.45923		-1.37134	0.611042	0.837352	-3.57386	-1.04474	-1.45923		-2.05163	-1.70874	12.7917
P35579	Myosin-9 OS=Homo sapiens OX=9606 GN=MYH9 PE=1 SV=4	[K].QFRTEMEDLMSSKDDVGK.[S]	2xOxidation [M6		164507	56503.6						17.3278	15.7861						-1.42685	-1.93427					-4.79269	-1.42685	-1.93427	-4.59244	-4.85006	-4.417		-1.9019	-1.7311	75.0609
P52272	Heterogeneous nuclear ribonucleoprotein M OS=Homo sapiens OX=9606 GN=HNRNPM PE=1 SV=3	[K].QGGGGGGGSVPGIER.[M]		23660.6	56235.6	33641.6	15425.9	12635.8	24583.4		14.5302	15.7792	15.038	13.9131	13.6252	14.5854		-2.67651	-2.97545	-2.68236	-2.98336	-2.85395	-2.407		-2.67651	-2.97545	-2.68236	-2.98336	-2.85395	-2.407		0.0300002	-0.15355	0.227603
O15511	Actin-related protein 2/3 complex subunit 5 OS=Homo sapiens OX=9606 GN=ARPC5 PE=1 SV=3	[R].QGNMTAALQAALK.[N]			280488	120221						18.0976	16.8753						-0.657065	-0.844996					-5.07162	-0.657065	-0.844996	-4.54182	-4.63884	-4.46001		-2.35566	-1.22272	2.76804
O15511	Actin-related protein 2/3 complex subunit 5 OS=Homo sapiens OX=9606 GN=ARPC5 PE=1 SV=3	[R].QGNMTAALQAALKNPPINTK.[S]	1xOxidation [M4]	24835	198035	85443.3	35444.3	13183.6	28893.7		14.6001	17.5954	16.3827	15.1133	13.6865	14.8185		-2.60661	-1.15925	-1.33764	-1.78317	-2.79271	-2.17394		-2.60661	-1.15925	-1.33764	-1.78317	-2.79271	-2.17394		-0.548771	-1.22272	2.76804
P35527	Keratin, type I cytoskeletal 9 OS=Homo sapiens OX=9606 GN=KRT9 PE=1 SV=3	[R].QGVDADINGLR.[Q]		2.37767e+06	3.84134e+07	2.6716e+06			7.03208e+06		21.1811	25.1951	21.3493			22.7455		3.97441	6.44046	3.62895			5.75312		3.97441	6.44046	3.62895	-4.48106	-4.65523	5.75312		-5.809	-0.363396	2.17627
P35579	Myosin-9 OS=Homo sapiens OX=9606 GN=MYH9 PE=1 SV=4	[R].QKHSQAVEELAEQLEQTK.[R]			3.74953e+06	1.14243e+06	116165		274721			21.8383	20.1237	16.8258		18.0676			3.08363	2.40335	-0.070614		1.07521		-4.8932	3.08363	2.40335	-0.070614	-4.76727	1.07521		-1.45215	-1.7311	75.0609
P35579	Myosin-9 OS=Homo sapiens OX=9606 GN=MYH9 PE=1 SV=4	[K].QFRTEMEDLMSSKDDVGK.[S]	1xOxidation [M10]		261714	81180.6			29455.4			17.9976	16.3088			14.8462			-0.757016	-1.41147			-2.14616		-4.97102	-0.757016	-1.41147	-4.63679	-4.87172	-2.14616		-1.50505	-1.7311	75.0609
P07355	Annexin A2 OS=Homo sapiens OX=9606 GN=ANXA2 PE=1 SV=2	[R].QDIAFAYQR.[R]		44750.7		144565		27269.5	106596		15.4496		17.1414		14.735	16.7018		-1.75708		-0.578963		-1.74417	-0.290612		-1.75708	-5.18713	-0.578963	-4.68403	-1.74417	-0.290612		0.268119	-0.226677	0.443687
Q71U36	Tubulin alpha-1A chain OS=Homo sapiens OX=9606 GN=TUBA1A PE=1 SV=1	[R].QLFHPEQLITGKEDAANNYAR.[G]			381968	180179	69823.5		150513			18.5431	17.4591	16.0914		17.1995			-0.211554	-0.261248	-0.805011		0.207125		-5.04927	-0.211554	-0.261248	-0.805011	-4.82599	0.207125		0.0327312	-0.302859	0.477627
P35580	Myosin-10 OS=Homo sapiens OX=9606 GN=MYH10 PE=1 SV=3	[R].QLLQANPILESFGNAK.[T]			1.6992e+06	465510			108885			20.6964	18.8285			16.7324			1.94178	1.10813			-0.259959		-5.01575	1.94178	1.10813	-4.47682	-4.80146	-0.259959		-2.52413	-1.95045	59.9637
TGME49_254720-t26_1-p1	transcript=TGME49_254720-t26_1 | gene=TGME49_254720 | organism=Toxoplasma_gondii_ME49 | gene_product=dense granule protein GRA8 | transcript_product=dense granule protein GRA8 | location=TGME49_chrIII:1904580-1905389(+) | protein_length=269 | sequence_SO=chromosome | SO=protein_coding | is_pseudo=false	[R].QPATATTTTTTR.[N]					206855	53227.2	94681.7					17.6583	15.6999	16.5308					0.761827	-0.779296	-0.461605		-4.82797	-5.27263	-4.76155	0.761827	-0.779296	-0.461605		4.79436	5.58595	15.2749
TGME49_275470-t26_1-p1	transcript=TGME49_275470-t26_1 | gene=TGME49_275470 | organism=Toxoplasma_gondii_ME49 | gene_product=dense granule protein GRA15 | transcript_product=dense granule protein GRA15 | location=TGME49_chrX:7287059-7288711(+) | protein_length=550 | sequence_SO=chromosome | SO=protein_coding | is_pseudo=false	[R].QPQVPGENSYYSVPTER.[T]					70297.8		40267.5					16.1012		15.2973					-0.795245		-1.69507		-4.91514	-5.30556	-4.74626	-0.795245	-4.90571	-1.69507		2.52364	4.44009	12.9114
Q9NYL9	Tropomodulin-3 OS=Homo sapiens OX=9606 GN=TMOD3 PE=1 SV=1	[R].QQLGTAVELEMAK.[M]			1.41142e+06	461428		8355.48	88370			20.4287	18.8157		13.0285	16.4313			1.67407	1.09542		-3.45067	-0.561134		-4.94388	1.67407	1.09542	-4.62468	-3.45067	-0.561134		-2.15403	-1.8006	9.86752
Q9NYL9	Tropomodulin-3 OS=Homo sapiens OX=9606 GN=TMOD3 PE=1 SV=1	[R].QQLGTAVELEMAK.[M]	1xOxidation [M11]	164974	1.87773e+06	541972	91965.7	71747.1	153531		17.3319	20.8406	19.0479	16.4888	16.1306	17.2282		0.125177	2.08591	1.32754	-0.407628	-0.34854	0.235767		0.125177	2.08591	1.32754	-0.407628	-0.34854	0.235767		-1.35301	-1.8006	9.86752
TGME49_270250-t26_1-p1	transcript=TGME49_270250-t26_1 | gene=TGME49_270250 | organism=Toxoplasma_gondii_ME49 | gene_product=dense granule protein GRA1 | transcript_product=dense granule protein GRA1 | location=TGME49_chrVIII:5310153-5310860(-) | protein_length=190 | sequence_SO=chromosome | SO=protein_coding | is_pseudo=false	[K].QQLKDDIGFLTGERE.[-]					26987		70039					14.72		16.0959					-2.17646		-0.89653		-5.0177	-5.33584	-4.81134	-2.17646	-4.87648	-0.89653		2.40514	5.87075	10.4661
P55769	NHP2-like protein 1 OS=Homo sapiens OX=9606 GN=SNU13 PE=1 SV=3	[K].QQIQSIQQSIER.[L]		123297	208522	92251.4	46721.5	30689.9	101333		16.9118	17.6698	16.4933	15.5118	14.9055	16.6287		-0.294921	-1.08481	-1.22704	-1.38464	-1.5737	-0.363659		-0.294921	-1.08481	-1.22704	-1.38464	-1.5737	-0.363659		-0.238408	-0.238408	0.636065
P35580	Myosin-10 OS=Homo sapiens OX=9606 GN=MYH10 PE=1 SV=3	[R].QRHATALEELSEQLEQAK.[R]			49863.7	55586.4	45076.5		35770.3			15.6057	15.7624	15.4601		15.1265			-3.14894	-1.95788	-1.43635		-1.86593		-4.82083	-3.14894	-1.95788	-1.43635	-4.83306	-1.86593		0.597438	-1.95045	59.9637
TGME49_203310-t26_1-p1	transcript=TGME49_203310-t26_1 | gene=TGME49_203310 | organism=Toxoplasma_gondii_ME49 | gene_product=dense granule protein GRA7 | transcript_product=dense granule protein GRA7 | location=TGME49_chrVIIa:2604424-2605134(+) | protein_length=236 | sequence_SO=chromosome | SO=protein_coding | is_pseudo=false	[R].QPALEQEVPESGKDGEDARQ.[-]					64697.8							15.9814							-0.915007				-4.95891	-5.23239	-4.88378	-0.915007	-4.69326	-4.62637		1.61348	3.58578	18.7485
Q969Q0	60S ribosomal protein L36a-like OS=Homo sapiens OX=9606 GN=RPL36AL PE=1 SV=3 60S ribosomal protein L36a OS=Homo sapiens OX=9606 GN=RPL36A PE=1 SV=2	[K].QSGYGGQTKPIFR.[K]		64869.3	242060	89525.8	14756.6	59074.1	79988		15.9852	17.885	16.45	13.8491	15.8502	16.2875		-1.22145	-0.869638	-1.27031	-3.04736	-0.628936	-0.704906		-1.22145	-0.869638	-1.27031	-3.04736	-0.628936	-0.704906		-0.339936	-0.223267	0.374694
Q86YZ3	Hornerin OS=Homo sapiens OX=9606 GN=HRNR PE=1 SV=2	[R].QSSSYGPHGYGSGR.[S]			550575	35859.8	160721	142381	289000			19.0706	15.1301	17.2942	17.1194	18.1407			0.315934	-2.59024	0.397766	0.640224	1.14831		-5.04983	0.315934	-2.59024	0.397766	0.640224	1.14831		3.17014	0.626863	2.59816
Q5D862	Filaggrin-2 OS=Homo sapiens OX=9606 GN=FLG2 PE=1 SV=1	[R].QSSYGQHGSGSSQSSGYGQYGSR.[E]			77779							16.2471							-2.50755						-5.05601	-2.50755	-4.85613	-4.52409	-4.85924	-4.43057		-0.464736	0.775277	1.04995
P13645	Keratin, type I cytoskeletal 10 OS=Homo sapiens OX=9606 GN=KRT10 PE=1 SV=6 Keratin, type I cytoskeletal 13 OS=Homo sapiens OX=9606 GN=KRT13 PE=1 SV=4	[R].QSVEADINGLR.[R]		469584	10808477	955573	591758	620093	1.9683e+06		18.841	23.3657	19.866	19.1746	19.2421	20.9085		1.63432	4.61101	2.14569	2.27821	2.76295	3.91612		1.63432	4.61101	2.14569	2.27821	2.76295	3.91612		0.188754	-0.141331	0.518507
P13645	Keratin, type I cytoskeletal 10 OS=Homo sapiens OX=9606 GN=KRT10 PE=1 SV=6 Keratin, type I cytoskeletal 13 OS=Homo sapiens OX=9606 GN=KRT13 PE=1 SV=4	[R].QSVEADINGLRR.[V]		757931	17678376	2.58046e+06	1.08488e+06	880528	2.90827e+06		19.5317	24.0755	21.2992	20.0491	19.748	21.4717		2.325	5.32084	3.57888	3.15267	3.26884	4.47933		2.325	5.32084	3.57888	3.15267	3.26884	4.47933		-0.107963	-0.141331	0.518507
Q07065	Cytoskeleton-associated protein 4 OS=Homo sapiens OX=9606 GN=CKAP4 PE=1 SV=2	[R].QTESLESLLSK.[S]		24480.4	196131	57480.8	39909.1	28149.5	83620.1		14.5793	17.5815	15.8108	15.2844	14.7808	16.3516		-2.62737	-1.17319	-1.90953	-1.61201	-1.69835	-0.640839		-2.62737	-1.17319	-1.90953	-1.61201	-1.69835	-0.640839		0.586296	0.114884	0.322937
P35580	Myosin-10 OS=Homo sapiens OX=9606 GN=MYH10 PE=1 SV=3	[K].QTKVEGELEEMER.[K]			362611		104917					18.4681		16.6789					-0.286582		-0.217553				-5.03398	-0.286582	-4.76083	-0.217553	-4.90607	-4.53876		0.139675	-1.95045	59.9637
P13645	Keratin, type I cytoskeletal 10 OS=Homo sapiens OX=9606 GN=KRT10 PE=1 SV=6	[K].QSLEASLAETEGR.[Y]		50913.4	2.84926e+06	236627	51282.2	66605.3	166498		15.6358	21.4422	17.8523	15.6462	16.0233	17.3451		-1.57094	2.68751	0.131933	-1.25027	-0.455823	0.352745		-1.57094	2.68751	0.131933	-1.25027	-0.455823	0.352745		-0.867281	-0.141331	0.518507
P35579	Myosin-9 OS=Homo sapiens OX=9606 GN=MYH9 PE=1 SV=4 Myosin-14 OS=Homo sapiens OX=9606 GN=MYH14 PE=1 SV=2	[R].QLLQANPILEAFGNAK.[T]			3.28049e+06	945443	21535		203292			21.6455	19.8506	14.3944		17.6332			2.89083	2.13031	-2.50204		0.640789		-5.02916	2.89083	2.13031	-2.50204	-4.82425	0.640789		-2.22583	-1.7311	75.0609
P62891	60S ribosomal protein L39 OS=Homo sapiens OX=9606 GN=RPL39 PE=1 SV=2	[K].QNRPIPQWIR.[M]		567658	2.49406e+06	1.22606e+06	1.69274e+06	254854	549026		19.1147	21.2501	20.2256	20.6909	17.9593	19.0665		1.90796	2.49542	2.50528	3.7945	1.48014	2.07411		1.90796	2.49542	2.50528	3.7945	1.48014	2.07411		0.146698	0.146698	0.22542
Q9Y3C1	Nucleolar protein 16 OS=Homo sapiens OX=9606 GN=NOP16 PE=1 SV=2	[R].QNLAEMGLAVDPNR.[A]			7.98089e+06	6559618						22.9281	22.6452						4.17347	4.92486					-5.00269	4.17347	4.92486	-4.70339	-4.76502	-4.68463		-6.0829	-1.49091	4.31549
P19474	E3 ubiquitin-protein ligase TRIM21 OS=Homo sapiens OX=9606 GN=TRIM21 PE=1 SV=1	[R].QLQELEKDER.[E]		67092.5	291951	195520		34249.1			16.0339	18.1554	17.577		15.0638			-1.17284	-0.599276	-0.143364		-1.4154			-1.17284	-0.599276	-0.143364	-4.44727	-1.4154	-4.61986		-2.85568	-1.30475	4.32229
P15924	Desmoplakin OS=Homo sapiens OX=9606 GN=DSP PE=1 SV=3	[R].QLQNIIQATSR.[E]			230999			18006.1				17.8175			14.1362				-0.937115			-2.34297			-4.80519	-0.937115	-4.88261	-4.51228	-2.34297	-4.44083		-0.223725	0.231076	0.904463
O95816	BAG family molecular chaperone regulator 2 OS=Homo sapiens OX=9606 GN=BAG2 PE=1 SV=1	[R].QISDGEREELNLTANR.[L]			40185.1		26090.9	11252.8	46216.2			15.2944		14.6713	13.458	15.4961			-3.46027		-2.22518	-3.02117	-1.49629		-4.91961	-3.46027	-4.78023	-2.22518	-3.02117	-1.49629		2.13916	1.8865	2.09239
P04264	Keratin, type II cytoskeletal 1 OS=Homo sapiens OX=9606 GN=KRT1 PE=1 SV=6	[K].QISNLQQSISDAEQR.[G]		216753	1.03291e+07	1.3414e+06	254219	440881	957385		17.7257	23.3002	20.3553	17.9557	18.75	19.8687		0.518988	4.54557	2.63499	1.05928	2.27086	2.87634		0.518988	4.54557	2.63499	1.05928	2.27086	2.87634		-0.497693	-0.0837483	0.431184
P04264	Keratin, type II cytoskeletal 1 OS=Homo sapiens OX=9606 GN=KRT1 PE=1 SV=6	[K].QISNLQQSISDAEQRGENALK.[D]			487423				44389.1			18.8948				15.4379			0.14017				-1.55448		-4.87289	0.14017	-4.79629	-4.5927	-4.87579	-1.55448		-0.49799	-0.0837483	0.431184
O00488	Zinc finger protein 593 OS=Homo sapiens OX=9606 GN=ZNF593 PE=1 SV=2	[K].QLSVEPYSQEEAER.[A]		104188	345781	173975	109086	56825.2	75016		16.6688	18.3995	17.4085	16.7351	15.7942	16.1949		-0.537877	-0.355147	-0.311799	-0.161325	-0.684929	-0.797492		-0.537877	-0.355147	-0.311799	-0.161325	-0.684929	-0.797492		-0.146308	-0.6042	1.05772
Q06830	Peroxiredoxin-1 OS=Homo sapiens OX=9606 GN=PRDX1 PE=1 SV=1	[R].QITVNDLPVGR.[S]		79979.1	502935	125994	71933.2	92838.3	212230		16.2873	18.94	16.943	16.1344	16.5024	17.6953		-0.919367	0.185368	-0.777321	-0.762066	0.0232604	0.702865		-0.919367	0.185368	-0.777321	-0.762066	0.0232604	0.702865		0.491793	0.164691	0.114016
Q9Y3C1	Nucleolar protein 16 OS=Homo sapiens OX=9606 GN=NOP16 PE=1 SV=2	[R].QNLAEMGLAVDPNR.[A]	1xOxidation [M6]	368710	739474	264097	254266	138405	118400		18.4921	19.4961	18.0107	17.956	17.0785	16.8533		1.28542	0.741494	0.290385	1.05955	0.599359	-0.139089		1.28542	0.741494	0.290385	1.05955	0.599359	-0.139089		-0.26583	-1.49091	4.31549
TGME49_254470-t26_1-p1	transcript=TGME49_254470-t26_1 | gene=TGME49_254470 | organism=Toxoplasma_gondii_ME49 | gene_product=hypothetical protein | transcript_product=hypothetical protein | location=TGME49_chrIII:1759224-1763403(+) | protein_length=732 | sequence_SO=chromosome | SO=protein_coding | is_pseudo=false	[R].QIVAAEVPLR.[E]					395047	143623	111664					18.5917	17.1319	16.7688					1.69523	0.652757	-0.223602		-4.97165	-5.19269	-4.91622	1.69523	0.652757	-0.223602		5.73498	4.61419	17.6154
TGME49_270240-t26_1-p1	transcript=TGME49_270240-t26_1 | gene=TGME49_270240 | organism=Toxoplasma_gondii_ME49 | gene_product=MAG1 | transcript_product=MAG1 | location=TGME49_chrVIII:5312269-5313737(+) | protein_length=452 | sequence_SO=chromosome | SO=protein_coding | is_pseudo=false	[K].QLVGTAAGEIEEGVKADTQAVQDSSK.[D]					214974		110693					17.7138		16.7562					0.817369		-0.236203		-5.02714	-5.39855	-4.72657	0.817369	-4.60916	-0.236203		3.70809	4.92705	34.9346
TGME49_270240-t26_1-p1	transcript=TGME49_270240-t26_1 | gene=TGME49_270240 | organism=Toxoplasma_gondii_ME49 | gene_product=MAG1 | transcript_product=MAG1 | location=TGME49_chrVIII:5312269-5313737(+) | protein_length=452 | sequence_SO=chromosome | SO=protein_coding | is_pseudo=false	[K].QLVGTAAGEIEEGVKADTQAVQDSSKDVLTK.[S]					204755		174832					17.6435		17.4156					0.747105		0.423209		-4.96264	-5.25621	-4.92393	0.747105	-4.852	0.423209		3.82037	4.92705	34.9346
P37802	Transgelin-2 OS=Homo sapiens OX=9606 GN=TAGLN2 PE=1 SV=3	[K].QMEQISQFLQAAER.[Y]	1xOxidation [M2]		129691	45776.3			26954.6			16.9847	15.4823			14.7182			-1.76992	-2.23801			-2.27416		-4.97058	-1.76992	-2.23801	-4.4721	-4.81781	-2.27416		-0.86185	-0.404367	0.504125
P62847	40S ribosomal protein S24 OS=Homo sapiens OX=9606 GN=RPS24 PE=1 SV=1	[K].QMVIDVLHPGK.[A]			1.36007e+06	520521	28793.6		208473			20.3752	18.9896	14.8135		17.6695			1.6206	1.26928	-2.08297		0.6771		-4.97726	1.6206	1.26928	-2.08297	-4.67531	0.6771		-1.33126	-1.50999	4.38185
P62847	40S ribosomal protein S24 OS=Homo sapiens OX=9606 GN=RPS24 PE=1 SV=1	[K].QMVIDVLHPGK.[A]	1xOxidation [M2]	772804	1.67254e+06	565526	273014	487937	328281		19.5597	20.6736	19.1092	18.0586	18.8963	18.3246		2.35304	1.91896	1.38891	1.16218	2.41716	1.33217		2.35304	1.91896	1.38891	1.16218	2.41716	1.33217		-0.249801	-1.50999	4.38185
TGME49_275470-t26_1-p1	transcript=TGME49_275470-t26_1 | gene=TGME49_275470 | organism=Toxoplasma_gondii_ME49 | gene_product=dense granule protein GRA15 | transcript_product=dense granule protein GRA15 | location=TGME49_chrX:7287059-7288711(+) | protein_length=550 | sequence_SO=chromosome | SO=protein_coding | is_pseudo=false	[R].QNGMVEGTSLTTTEAGMPAPLQSPQHIETEAR.[L]	2xOxidation [M4				50708.2		34961.5					15.6299		15.0935					-1.2665		-1.89892		-4.86942	-5.24011	-4.85362	-1.2665	-4.62129	-1.89892		2.39214	4.44009	12.9114
TGME49_270240-t26_1-p1	transcript=TGME49_270240-t26_1 | gene=TGME49_270240 | organism=Toxoplasma_gondii_ME49 | gene_product=MAG1 | transcript_product=MAG1 | location=TGME49_chrVIII:5312269-5313737(+) | protein_length=452 | sequence_SO=chromosome | SO=protein_coding | is_pseudo=false	[K].QLVGTAAGEIEEGVK.[A]					984343	314834	525917					19.9088	18.2642	19.0045					3.01237	1.78506	2.01207		-4.98965	-5.17245	-4.73168	3.01237	1.78506	2.01207		7.23442	4.92705	34.9346
P04792	Heat shock protein beta-1 OS=Homo sapiens OX=9606 GN=HSPB1 PE=1 SV=2	[R].QDEHGYISR.[C]		27062.8	169969	103933	38622.8	39261.2	75847.9		14.724	17.3749	16.6653	15.2372	15.2608	16.2108		-2.48268	-1.37973	-1.05503	-1.65927	-1.21836	-0.78158		-2.48268	-1.37973	-1.05503	-1.65927	-1.21836	-0.78158		0.419412	-0.174985	0.374866
Q99961	Endophilin-A2 OS=Homo sapiens OX=9606 GN=SH3GL1 PE=1 SV=1	[R].QAVQILDELAEK.[L]			55861.3		18678.4					15.7696		14.1891					-2.98508		-2.70735				-4.80148	-2.98508	-4.90291	-2.70735	-4.7756	-4.40938		0.265712	0.265712	0.35764
P04264	Keratin, type II cytoskeletal 1 OS=Homo sapiens OX=9606 GN=KRT1 PE=1 SV=6 Keratin, type II cytoskeletal 6B OS=Homo sapiens OX=9606 GN=KRT6B PE=1 SV=5 Keratin, type II cytoskeletal 6A OS=Homo sapiens OX=9606 GN=KRT6A PE=1 SV=3 Keratin, type II cytoskeletal 5 OS=Homo sapiens OX=9606 GN=KRT5 PE=1 SV=3	[RK].NKYEDEINKR.[T]		1.84514e+06	3.80699e+07	3.61056e+06	1.84568e+06	3.85106e+06	4.82084e+06		20.8153	25.1821	21.7838	20.8157	21.8768	22.2009		3.6086	6.4275	4.06347	3.91929	5.39765	5.20845		3.6086	6.4275	4.06347	3.91929	5.39765	5.20845		0.14194	-0.0837483	0.431184
Q5XKE5	Keratin, type II cytoskeletal 79 OS=Homo sapiens OX=9606 GN=KRT79 PE=1 SV=2 Keratin, type II cytoskeletal 2 epidermal OS=Homo sapiens OX=9606 GN=KRT2 PE=1 SV=2 Keratin, type II cytoskeletal 6B OS=Homo sapiens OX=9606 GN=KRT6B PE=1 SV=5 Keratin, type II cytoskeletal 6A OS=Homo sapiens OX=9606 GN=KRT6A PE=1 SV=3 Keratin, type II cytoskeletal 75 OS=Homo sapiens OX=9606 GN=KRT75 PE=1 SV=2 Keratin, ty…	[R].NLDLDSIIAEVK.[A]		95575.2	1.919e+07	829637	532325	60167.2	2.18305e+06		16.5443	24.1939	19.6621	19.0219	15.8767	21.0579		-0.662354	5.43921	1.9418	2.12551	-0.602483	4.06551		-0.662354	5.43921	1.9418	2.12551	-0.602483	4.06551		-0.376703	-0.384744	0.814255
TGME49_299050-t26_1-p1	transcript=TGME49_299050-t26_1 | gene=TGME49_299050 | organism=Toxoplasma_gondii_ME49 | gene_product=ribosomal protein RPL17 | transcript_product=ribosomal protein RPL17 | location=TGME49_chrIII:2224012-2226278(-) | protein_length=195 | sequence_SO=chromosome | SO=protein_coding | is_pseudo=false	[K].NLDVDNLVIEHIQVNR.[A]			82365				16322.8			16.3297				13.9946			-2.4249				-2.9978		-4.78776	-2.4249	-4.80527	-4.50711	-4.628	-2.9978		-0.0383264	-0.0383264	0.0439635
P05387	60S acidic ribosomal protein P2 OS=Homo sapiens OX=9606 GN=RPLP2 PE=1 SV=1	[K].NIEDVIAQGIGK.[L]		142672	1856527	862534	238347	65370.7	436668		17.1223	20.8242	19.7182	17.8627	15.9964	18.7362		-0.0843563	2.06953	1.9979	0.966266	-0.482816	1.74378		-0.0843563	2.06953	1.9979	0.966266	-0.482816	1.74378		-0.585283	-0.520351	0.985711
A5D8V6	Vacuolar protein sorting-associated protein 37C OS=Homo sapiens OX=9606 GN=VPS37C PE=1 SV=2	[R].NLEFQGPLEISR.[S]					808043	59779.2	399179					19.6241	15.8674	18.6067					2.72764	-0.611817	1.61427		-5.021	-5.29122	-4.75168	2.72764	-0.611817	1.61427		6.26466	6.26466	5.54116
P06702	Protein S100-A9 OS=Homo sapiens OX=9606 GN=S100A9 PE=1 SV=1	[R].NIETIINTFHQYSVK.[L]			90745.5				161774			16.4695				17.3036			-2.28511				0.311222		-4.9493	-2.28511	-4.7595	-4.41221	-4.64504	0.311222		1.08263	2.11927	5.16912
P07585	Decorin OS=Homo sapiens OX=9606 GN=DCN PE=1 SV=1	[K].NLHALILVNNK.[I]		25276	103976	58793.2	26425.5	13856			14.6255	16.6659	15.8434	14.6896	13.7582			-2.58122	-2.08875	-1.87696	-2.20679	-2.72095			-2.58122	-2.08875	-1.87696	-2.20679	-2.72095	-4.44658		-0.942461	-0.947073	1.31717
Q5XKE5	Keratin, type II cytoskeletal 79 OS=Homo sapiens OX=9606 GN=KRT79 PE=1 SV=2 Keratin, type II cytoskeletal 1 OS=Homo sapiens OX=9606 GN=KRT1 PE=1 SV=6 Keratin, type II cytoskeletal 6B OS=Homo sapiens OX=9606 GN=KRT6B PE=1 SV=5 Keratin, type II cytoskeletal 6A OS=Homo sapiens OX=9606 GN=KRT6A PE=1 SV=3 Keratin, type II cytoskeletal 5 OS=Homo sapiens OX=9606 GN=KRT5 PE=1 SV=3	[KR].NKYEDEINK.[HR]			997107	210152		44628.9	82243.9			19.9274	17.6811		15.4457	16.3276			1.17274	-0.0392479		-1.03348	-0.664781		-5.03774	1.17274	-0.0392479	-4.52667	-1.03348	-0.664781		-0.773563	-0.384744	0.814255
Q16555	Dihydropyrimidinase-related protein 2 OS=Homo sapiens OX=9606 GN=DPYSL2 PE=1 SV=1	[R].NLHQSGFSLSGAQIDDNIPR.[R]			41864.4							15.3534							-3.40121						-4.81965	-3.40121	-4.92108	-4.68778	-4.85365	-4.61751		-0.338997	-0.384675	0.275574
P08670	Vimentin OS=Homo sapiens OX=9606 GN=VIM PE=1 SV=4	[K].NLQEAEEWYK.[S]		74712.4	2.19129e+06	681946	109199		202029		16.1891	21.0634	19.3793	16.7366		17.6242		-1.01764	2.30871	1.65898	-0.159838		0.631798		-1.01764	2.30871	1.65898	-0.159838	-4.84665	0.631798		-2.44158	-1.45396	18.1104
P02751	Fibronectin OS=Homo sapiens OX=9606 GN=FN1 PE=1 SV=4	[R].NLQPASEYTVSLVAIK.[G]		81644.3	418232	173052			70933.7		16.3171	18.6739	17.4008			16.1142		-0.889637	-0.0807024	-0.319479			-0.878218		-0.889637	-0.0807024	-0.319479	-4.64737	-4.81995	-0.878218		-3.01857	-1.69425	11.343
P04264	Keratin, type II cytoskeletal 1 OS=Homo sapiens OX=9606 GN=KRT1 PE=1 SV=6	[K].NMQDMVEDYR.[N]	1xOxidation [M]		8.86101e+06	695334			423269			23.079	19.4073			18.6912			4.32439	1.68703			1.69881		-4.83896	4.32439	1.68703	-4.44991	-4.77493	1.69881		-2.8995	-0.0837483	0.431184
P04264	Keratin, type II cytoskeletal 1 OS=Homo sapiens OX=9606 GN=KRT1 PE=1 SV=6	[K].NMQDMVEDYR.[N]	2xOxidation [M2	403591	1.02119e+07	680765	204792	903792	896028		18.6225	23.2838	19.3768	17.6438	19.7856	19.7732		1.41583	4.52911	1.65648	0.747365	3.30646	2.78078		1.41583	4.52911	1.65648	0.747365	3.30646	2.78078		-0.255602	-0.0837483	0.431184
P15924	Desmoplakin OS=Homo sapiens OX=9606 GN=DSP PE=1 SV=3	[R].NNYDEEIISLK.[N]			87962.8				15585.6			16.4246				13.9279			-2.33004				-3.06447		-5.07377	-2.33004	-4.89636	-4.62371	-4.86741	-3.06447		-0.0851392	0.231076	0.904463
P13645	Keratin, type I cytoskeletal 10 OS=Homo sapiens OX=9606 GN=KRT10 PE=1 SV=6	[K].NQILNLTTDNANILLQIDNAR.[L]			460549							18.813							0.0583483						-4.84636	0.0583483	-4.87329	-4.5565	-4.83825	-4.67497		-1.46947	-0.141331	0.518507
P11021	Endoplasmic reticulum chaperone BiP OS=Homo sapiens OX=9606 GN=HSPA5 PE=1 SV=2	[K].NQLTSNPENTVFDAK.[R]		72543.8	258280	155591	30401.8	45955.5	74174		16.1466	17.9786	17.2474	14.8919	15.488	16.1786		-1.06014	-0.776066	-0.472922	-2.00457	-0.991221	-0.813776		-1.06014	-0.776066	-0.472922	-2.00457	-0.991221	-0.813776		-0.500146	-0.218298	0.708121
P05090	Apolipoprotein D OS=Homo sapiens OX=9606 GN=APOD PE=1 SV=1	[K].NILTSNNIDVK.[K]			43022.9			22308.9	41439.6			15.3928			14.4453	15.3387			-3.36183			-2.03384	-1.65368		-4.82739	-3.36183	-4.76929	-4.42287	-2.03384	-1.65368		1.61604	1.93598	1.34828
P11021	Endoplasmic reticulum chaperone BiP OS=Homo sapiens OX=9606 GN=HSPA5 PE=1 SV=2	[K].NQLTSNPENTVFDAKR.[L]		20267.6	75888.4	45319.9			32363.7		14.3069	16.2116	15.4679			14.9821		-2.89982	-2.54305	-2.25246			-2.01031		-2.89982	-2.54305	-2.25246	-4.49187	-4.69938	-2.01031		-1.16874	-0.218298	0.708121
P46776	60S ribosomal protein L27a OS=Homo sapiens OX=9606 GN=RPL27A PE=1 SV=2	[K].NKTGAAPIIDVVR.[S]		184860	301022	106232	68803.7	63446.7	53165.1		17.4961	18.1995	16.6969	16.0702	15.9533	15.6982		0.289368	-0.555137	-1.02346	-0.826237	-0.525914	-1.29421		0.289368	-0.555137	-1.02346	-0.826237	-0.525914	-1.29421		-0.452377	-0.721581	1.30584
P35580	Myosin-10 OS=Homo sapiens OX=9606 GN=MYH10 PE=1 SV=3	[R].NKQEVMISDLEER.[L]			1.02887e+06	334368			52430.4			19.9726	18.3511			15.6781			1.21799	0.630758			-1.31429		-5.01151	1.21799	0.630758	-4.55864	-4.70383	-1.31429		-2.47133	-1.95045	59.9637
P35527	Keratin, type I cytoskeletal 9 OS=Homo sapiens OX=9606 GN=KRT9 PE=1 SV=3	[K].NHKEEMSQLTGQNSGDVNVEINVAPGK.[D]			2.35113e+06	296181						21.1649	18.1761						2.41028	0.455796					-4.87976	2.41028	0.455796	-4.48578	-4.64698	-4.40115		-3.84008	-0.363396	2.17627
P35527	Keratin, type I cytoskeletal 9 OS=Homo sapiens OX=9606 GN=KRT9 PE=1 SV=3	[K].NHKEEMSQLTGQNSGDVNVEINVAPGK.[D]	1xOxidation [M6]		3.9086e+06	541868	147107	80373.2	278443			21.8982	19.0476	17.1665	16.2944	18.087			3.14357	1.32726	0.270067	-0.184746	1.09462		-4.85164	3.14357	1.32726	0.270067	-0.184746	1.09462		0.520249	-0.363396	2.17627
P35527	Keratin, type I cytoskeletal 9 OS=Homo sapiens OX=9606 GN=KRT9 PE=1 SV=3	[K].NHKEEMSQLTGQNSGDVNVEINVAPGKDLTK.[T]			3834474	306605	33021.1		208543			21.8706	18.226	15.0111		17.67			3.11595	0.505703	-1.88534		0.677581		-4.89483	3.11595	0.505703	-1.88534	-4.81182	0.677581		-1.58213	-0.363396	2.17627
P35527	Keratin, type I cytoskeletal 9 OS=Homo sapiens OX=9606 GN=KRT9 PE=1 SV=3	[K].NHKEEMSQLTGQNSGDVNVEINVAPGKDLTK.[T]	1xOxidation [M6]	70044.9	1.08136e+07	1.05358e+06	781769	295052	1.18156e+06		16.096	23.3663	20.0069	19.5764	18.1706	20.1723		-1.11071	4.61169	2.28655	2.67995	1.69144	3.17987		-1.11071	4.61169	2.28655	2.67995	1.69144	3.17987		0.587904	-0.363396	2.17627
P60660	Myosin light polypeptide 6 OS=Homo sapiens OX=9606 GN=MYL6 PE=1 SV=2	[K].NKDQGTYEDYVEGLR.[V]		2.43562e+06	1.83159e+08	7.50469e+07	9.03403e+06	1.29944e+06	2.58246e+07		21.2159	27.4485	26.1613	23.1069	20.3095	24.6222		4.00915	8.69387	8.44097	6.2105	3.83029	7.62984		4.00915	8.69387	8.44097	6.2105	3.83029	7.62984		-1.15779	-0.835341	2.76722
P62753	40S ribosomal protein S6 OS=Homo sapiens OX=9606 GN=RPS6 PE=1 SV=1	[K].NKEEAAEYAK.[L]			2377091	975563	387599					21.1808	19.8959	18.5642					2.42612	2.17555	1.66777				-5.06621	2.42612	2.17555	1.66777	-4.80593	-4.66775		-2.44712	-0.930869	2.99966
P35579	Myosin-9 OS=Homo sapiens OX=9606 GN=MYH9 PE=1 SV=4	[K].NKHEAMITDLEER.[L]		6617.73	1.62396e+06	663631			133301		12.6921	20.6311	19.34			17.0243		-4.51458	1.87644	1.6197			0.0319236		-4.51458	1.87644	1.6197	-4.68899	-4.73452	0.0319236		-2.79105	-1.7311	75.0609
P35580	Myosin-10 OS=Homo sapiens OX=9606 GN=MYH10 PE=1 SV=3	[R].NKQEVMISDLEER.[L]	1xOxidation [M6]	157306	2.14417e+06	721977	16422.5	86208.2	66188.1		17.2632	21.032	19.4616	14.0034	16.3955	16.0143		0.0565091	2.27734	1.74127	-2.89305	-0.0836346	-0.978117		0.0565091	2.27734	1.74127	-2.89305	-0.0836346	-0.978117		-2.67664	-1.95045	59.9637
P35579	Myosin-9 OS=Homo sapiens OX=9606 GN=MYH9 PE=1 SV=4	[K].NKHEAMITDLEER.[L]	1xOxidation [M6]	179703	4.0232e+06	1.77483e+06	76451.2	205249	276975		17.4553	21.9399	20.7593	16.2223	17.647	18.0794		0.248556	3.18527	3.03893	-0.674184	1.16785	1.08699		0.248556	3.18527	3.03893	-0.674184	1.16785	1.08699		-1.6307	-1.7311	75.0609
P62750	60S ribosomal protein L23a OS=Homo sapiens OX=9606 GN=RPL23A PE=1 SV=1	[R].NKLDHYAIIK.[F]		230891	724582	388348	72664.7	206556	256029		17.8169	19.4668	18.567	16.149	17.6562	17.966		0.610152	0.712144	0.84667	-0.747469	1.177	0.973548		0.610152	0.712144	0.84667	-0.747469	1.177	0.973548		-0.255295	-0.330071	0.980072
P62750	60S ribosomal protein L23a OS=Homo sapiens OX=9606 GN=RPL23A PE=1 SV=1	[R].NKLDHYAIIKFPLTTESAMK.[K]	1xOxidation [M19]		640601	157908			205134			19.2891	17.2687			17.6462			0.534421	-0.451595			0.653804		-4.82898	0.534421	-0.451595	-4.69025	-4.90148	0.653804		-1.39726	-0.330071	0.980072
P04259	Keratin, type II cytoskeletal 6B OS=Homo sapiens OX=9606 GN=KRT6B PE=1 SV=5 Keratin, type II cytoskeletal 6A OS=Homo sapiens OX=9606 GN=KRT6A PE=1 SV=3	[K].NKLEGLEDALQK.[A]			211533							17.6905							-1.06412						-4.85075	-1.06412	-4.70914	-4.54182	-4.63383	-4.45409		-1.00191	0.27429	0.873474
P04264	Keratin, type II cytoskeletal 1 OS=Homo sapiens OX=9606 GN=KRT1 PE=1 SV=6	[K].NKLNDLEDALQQAK.[E]		307069	4.51244e+06	468988	139273	54188.7	235098		18.2282	22.1055	18.8392	17.0876	15.7257	17.8429		1.0215	3.35083	1.11887	0.19112	-0.753468	0.850498		1.0215	3.35083	1.11887	0.19112	-0.753468	0.850498		-1.73435	-0.0837483	0.431184
P04264	Keratin, type II cytoskeletal 1 OS=Homo sapiens OX=9606 GN=KRT1 PE=1 SV=6	[K].NKLNDLEDALQQAKEDLAR.[L]			1.04952e+06				40111.1			20.0013				15.2917			1.24665				-1.70069		-5.05078	1.24665	-4.8804	-4.50447	-4.66765	-1.70069		-0.729427	-0.0837483	0.431184
P35908	Keratin, type II cytoskeletal 2 epidermal OS=Homo sapiens OX=9606 GN=KRT2 PE=1 SV=2	[R].NKLNDLEEALQQAK.[E]			556599				62279.9			19.0863				15.9265			0.331633				-1.06592		-5.07395	0.331633	-4.81239	-4.51803	-4.89298	-1.06592		-0.307409	0.181252	0.903762
P35908	Keratin, type II cytoskeletal 2 epidermal OS=Homo sapiens OX=9606 GN=KRT2 PE=1 SV=2	[R].NKLNDLEEALQQAKEDLAR.[L]			100537							16.6174							-2.13728						-4.89644	-2.13728	-4.90165	-4.56191	-4.66575	-4.61414		-0.635475	0.181252	0.903762
P13647	Keratin, type II cytoskeletal 5 OS=Homo sapiens OX=9606 GN=KRT5 PE=1 SV=3	[R].NKLAELEEALQK.[A]			139426							17.0891							-1.6655						-4.84941	-1.6655	-4.80962	-4.62702	-4.77839	-4.56365		-0.881507	0.091607	0.259862
TGME49_254470-t26_1-p1	transcript=TGME49_254470-t26_1 | gene=TGME49_254470 | organism=Toxoplasma_gondii_ME49 | gene_product=hypothetical protein | transcript_product=hypothetical protein | location=TGME49_chrIII:1759224-1763403(+) | protein_length=732 | sequence_SO=chromosome | SO=protein_coding | is_pseudo=false	[K].NQPDGDFKGSESFSPSGFDYR.[E]					43148.6		44831.6					15.397		15.4522					-1.49941		-1.54017		-4.89524	-5.15568	-4.80802	-1.49941	-4.76178	-1.54017		2.35253	4.61419	17.6154
P46776	60S ribosomal protein L27a OS=Homo sapiens OX=9606 GN=RPL27A PE=1 SV=2	[R].NQSFCPTVNLDK.[L]	1xCarbamidomethyl [C5]	53449.5	271412	129659		45372	52786.9		15.7059	18.0501	16.9844		15.4695	15.6879		-1.50081	-0.704518	-0.735956		-1.00966	-1.30451		-1.50081	-0.704518	-0.735956	-4.6267	-1.00966	-1.30451		-1.33319	-0.721581	1.30584
P11142	Heat shock cognate 71 kDa protein OS=Homo sapiens OX=9606 GN=HSPA8 PE=1 SV=1	[K].NQVAMNPTNTVFDAK.[R]	1xOxidation [M5]	48105.8	123539	77745	35494.8	43029.3	47160.5		15.5539	16.9146	16.2465	15.1153	15.393	15.5253		-1.65278	-1.84004	-1.47386	-1.78112	-1.08614	-1.46711		-1.65278	-1.84004	-1.47386	-1.78112	-1.08614	-1.46711		0.210771	-0.279499	0.522606
P15924	Desmoplakin OS=Homo sapiens OX=9606 GN=DSP PE=1 SV=3	[K].NTLTQTTENLR.[R]			79844.5	13313.1		19600.5	21326.7			16.2849	13.7006		14.2586	14.3804			-2.46974	-4.01976		-2.22057	-2.61203		-4.85594	-2.46974	-4.01976	-4.47947	-2.22057	-2.61203		0.677792	0.231076	0.904463
P13645	Keratin, type I cytoskeletal 10 OS=Homo sapiens OX=9606 GN=KRT10 PE=1 SV=6	[R].NVQALEIELQSQLALK.[Q]			465385	144886		14113.6	24619.8			18.8281	17.1446		13.7848	14.5875			0.0734208	-0.575765		-2.69438	-2.40487		-4.91128	0.0734208	-0.575765	-4.6795	-2.69438	-2.40487		-1.45504	-0.141331	0.518507
TGME49_279100-t26_1-p1	transcript=TGME49_279100-t26_1 | gene=TGME49_279100 | organism=Toxoplasma_gondii_ME49 | gene_product=hypothetical protein | transcript_product=hypothetical protein | location=TGME49_chrII:91398-93249(+) | protein_length=435 | sequence_SO=chromosome | SO=protein_coding | is_pseudo=false	[R].NVQAPAGVADASQEAGDVVEER.[T]					44049.1		47273.4					15.4268		15.5287					-1.46961		-1.46366		-5.07672	-5.14735	-4.85429	-1.46961	-4.71811	-1.46366		2.47566	2.1316	1.45666
P35908	Keratin, type II cytoskeletal 2 epidermal OS=Homo sapiens OX=9606 GN=KRT2 PE=1 SV=2	[K].NVQDAIADAEQR.[G]			2031955	121034	57276.8	115839	247127			20.9544	16.8851	15.8057	16.8218	17.9149			2.19979	-0.835263	-1.09077	0.342592	0.922491		-4.92813	2.19979	-0.835263	-1.09077	0.342592	0.922491		1.24597	0.181252	0.903762
P35908	Keratin, type II cytoskeletal 2 epidermal OS=Homo sapiens OX=9606 GN=KRT2 PE=1 SV=2	[K].NVQDAIADAEQRGEHALK.[D]			314642							18.2634							-0.491293						-4.97209	-0.491293	-4.71922	-4.42254	-4.8393	-4.56718		-1.21547	0.181252	0.903762
P13645	Keratin, type I cytoskeletal 10 OS=Homo sapiens OX=9606 GN=KRT10 PE=1 SV=6	[R].NVSTGDVNVEMNAAPGVDLTQLLNNMR.[S]	2xOxidation [M11		27450790	1.41175e+06	1.23215e+06	20554.1	2.45251e+06			24.7103	20.429	20.2327	14.3271	21.2258			5.9557	2.70873	3.33631	-2.15204	4.23342		-4.91636	5.9557	2.70873	3.33631	-2.15204	4.23342		0.556544	-0.141331	0.518507
P06312	Immunoglobulin kappa variable 4-1 OS=Homo sapiens OX=9606 GN=IGKV4-1 PE=1 SV=1	[K].NYLAWYQQKPGQPPK.[L]			392594	176941	40321.8		93681.1			18.5827	17.4329	15.2993		16.5155			-0.171966	-0.287414	-1.59716		-0.476932		-4.86803	-0.171966	-0.287414	-1.59716	-4.77504	-0.476932		-0.507241	-0.303123	0.214759
P04259	Keratin, type II cytoskeletal 6B OS=Homo sapiens OX=9606 GN=KRT6B PE=1 SV=5 Keratin, type II cytoskeletal 6A OS=Homo sapiens OX=9606 GN=KRT6A PE=1 SV=3	[R].NTKQEIAEINR.[M]			382337	64562.9	38476.1	75549.1	87356.9			18.5445	15.9784	15.2317	16.2051	16.4146			-0.210159	-1.7419	-1.66476	-0.274045	-0.577768		-4.84426	-0.210159	-1.7419	-1.66476	-0.274045	-0.577768		1.42658	0.27429	0.873474
P67809	Nuclease-sensitive element-binding protein 1 OS=Homo sapiens OX=9606 GN=YBX1 PE=1 SV=3	[R].NYQQNYQNSESGEKNEGSESAPEGQAQQR.[R]			78419.9			16666.3				16.2589			14.0247				-2.49571			-2.45452			-4.91689	-2.49571	-4.95412	-4.47064	-2.45452	-4.53104		0.303506	-0.151134	0.174305
P35527	Keratin, type I cytoskeletal 9 OS=Homo sapiens OX=9606 GN=KRT9 PE=1 SV=3	[K].NYSPYYNTIDDLKDQIVDLTVGNNK.[T]			52908.6							15.6912							-3.06343						-4.92045	-3.06343	-4.6937	-4.58353	-4.86928	-4.56054		-0.445256	-0.363396	2.17627
Q6NZI2	Caveolae-associated protein 1 OS=Homo sapiens OX=9606 GN=CAVIN1 PE=1 SV=1	[R].QAEMEGAVQSIQGELSK.[L]			390303	133994			47687.1			18.5742	17.0318			15.5413			-0.180409	-0.688515			-1.45109		-4.87796	-0.180409	-0.688515	-4.52797	-4.74605	-1.45109		-1.65941	-1.10579	4.72458
Q6NZI2	Caveolae-associated protein 1 OS=Homo sapiens OX=9606 GN=CAVIN1 PE=1 SV=1	[R].QAEMEGAVQSIQGELSK.[L]	1xOxidation [M4]	777470	1.38367e+06	531844	127453	209985	254706		19.5684	20.4001	19.0206	16.9596	17.6799	17.9585		2.36173	1.64542	1.30032	0.0631704	1.20075	0.966071		2.36173	1.64542	1.30032	0.0631704	1.20075	0.966071		-1.02583	-1.10579	4.72458
O75340	Programmed cell death protein 6 OS=Homo sapiens OX=9606 GN=PDCD6 PE=1 SV=1	[K].QALSGFGYR.[L]					2.3214e+06	887813	1363182					21.1466	19.7599	20.3785					4.25013	3.28072	3.38614		-4.87274	-5.27265	-4.79981	4.25013	3.28072	3.38614		8.62073	5.79024	17.3889
P35579	Myosin-9 OS=Homo sapiens OX=9606 GN=MYH9 PE=1 SV=4	[R].QAQQERDELADEIANSSGK.[G]		177077	9.37521e+06	3.40274e+06	237005	117790	987714		17.434	23.1604	21.6983	17.8546	16.8459	19.9137		0.227318	4.40577	3.97794	0.95812	0.366686	2.92133		0.227318	4.40577	3.97794	0.95812	0.366686	2.92133		-1.45497	-1.7311	75.0609
P17302	Gap junction alpha-1 protein OS=Homo sapiens OX=9606 GN=GJA1 PE=1 SV=2	[K].QASEQNWANYSAEQNR.[M]			179200	97842.3			22543.5			17.4512	16.5782			14.4604			-1.30344	-1.14215			-2.53198		-5.02137	-1.30344	-1.14215	-4.44435	-4.67542	-2.53198		-1.39493	-1.89798	3.40847
Q9Y6C2	EMILIN-1 OS=Homo sapiens OX=9606 GN=EMILIN1 PE=1 SV=3	[R].QATLEGLQEVVGR.[L]		166301							17.3434							0.136734							0.136734	-5.30195	-4.74819	-4.65605	-4.7521	-4.69901		-1.39792	-1.37014	6.27959
P35527	Keratin, type I cytoskeletal 9 OS=Homo sapiens OX=9606 GN=KRT9 PE=1 SV=3	[K].NYSPYYNTIDDLK.[D]			370098	82401.2			18589.5			18.4975	16.3304			14.1822			-0.257098	-1.38994			-2.8102		-5.02862	-0.257098	-1.38994	-4.59075	-4.83274	-2.8102		-1.85268	-0.363396	2.17627
P15924	Desmoplakin OS=Homo sapiens OX=9606 GN=DSP PE=1 SV=3	[K].NTKIEVLEEELR.[L]			82749.1							16.3365							-2.41819						-4.81533	-2.41819	-4.83013	-4.66264	-4.75027	-4.41279		-0.587351	0.231076	0.904463
P35580	Myosin-10 OS=Homo sapiens OX=9606 GN=MYH10 PE=1 SV=3	[R].NTDQASMPENTVAQK.[L]			196944	99466						17.5874	16.6019						-1.16722	-1.11841					-4.93946	-1.16722	-1.11841	-4.52344	-4.66214	-4.43842		-2.13297	-1.95045	59.9637
Q9Y608	Leucine-rich repeat flightless-interacting protein 2 OS=Homo sapiens OX=9606 GN=LRRFIP2 PE=1 SV=1	[R].NSASATTPLSGNSSR.[R]		26601.4	263664	80122.3			22296		14.6992	18.0083	16.2899			14.4445		-2.50749	-0.746305	-1.43041			-2.5479		-2.50749	-0.746305	-1.43041	-4.60579	-4.78938	-2.5479		-2.41962	-1.52753	6.05819
TGME49_203310-t26_1-p1	transcript=TGME49_203310-t26_1 | gene=TGME49_203310 | organism=Toxoplasma_gondii_ME49 | gene_product=dense granule protein GRA7 | transcript_product=dense granule protein GRA7 | location=TGME49_chrVIIa:2604424-2605134(+) | protein_length=236 | sequence_SO=chromosome | SO=protein_coding | is_pseudo=false	[R].NSDFFDGQAPVDSLRPTNAGVDSK.[G]		28333.3	49578.8		1.16487e+06	24693.1	871724		14.7902	15.5974		20.1517	14.5918	19.7335		-2.41649	-3.15721		3.25531	-1.88735	2.74111		-2.41649	-3.15721	-4.8843	3.25531	-1.88735	2.74111		4.85569	3.58578	18.7485
P35579	Myosin-9 OS=Homo sapiens OX=9606 GN=MYH9 PE=1 SV=4	[K].NSFREQLEEEEEAKHNLEK.[Q]			582250	169164			39490.6			19.1513	17.3681			15.2692			0.396635	-0.35226			-1.72318		-4.95884	0.396635	-0.35226	-4.67431	-4.89746	-1.72318		-2.12683	-1.7311	75.0609
P04264	Keratin, type II cytoskeletal 1 OS=Homo sapiens OX=9606 GN=KRT1 PE=1 SV=6	[R].NSKIEISELNR.[V]		599212	5.47602e+06	641511	492568	919548	889417		19.1927	22.3847	19.2911	18.91	19.8106	19.7625		1.986	3.63005	1.57079	2.01353	3.33139	2.7701		1.986	3.63005	1.57079	2.01353	3.33139	2.7701		0.30939	-0.0837483	0.431184
O76013	Keratin, type I cuticular Ha6 OS=Homo sapiens OX=9606 GN=KRT36 PE=2 SV=1	[R].NSLESTLAETEAR.[Y]			88761.3							16.4376							-2.317						-4.96651	-2.317	-4.84432	-4.54975	-4.78573	-4.47435		-0.560669	-0.105825	0.0724279
P11142	Heat shock cognate 71 kDa protein OS=Homo sapiens OX=9606 GN=HSPA8 PE=1 SV=1	[K].NSLESYAFNMK.[A]	1xOxidation [M10]	86602.3	339907	175454	106841	65782.9	169812		16.4021	18.3748	17.4207	16.7051	16.0054	17.3736		-0.804585	-0.379866	-0.299589	-0.191334	-0.473748	0.381176		-0.804585	-0.379866	-0.299589	-0.191334	-0.473748	0.381176		0.400045	-0.279499	0.522606
P35580	Myosin-10 OS=Homo sapiens OX=9606 GN=MYH10 PE=1 SV=3	[K].NSLQEQQEEEEEAR.[K]			125145	55830.9						16.9332	15.7688						-1.8214	-1.95154					-5.00039	-1.8214	-1.95154	-4.41559	-4.6143	-4.49065		-1.58241	-1.95045	59.9637
P35580	Myosin-10 OS=Homo sapiens OX=9606 GN=MYH10 PE=1 SV=3	[K].NSLQEQQEEEEEARK.[N]		56424.6	62601.4	50063.6	92464.7	41107.3	11648.3		15.784	15.9339	15.6115	16.4966	15.3271	13.5078		-1.42267	-2.82074	-2.10885	-0.399822	-1.15207	-3.48457		-1.42267	-2.82074	-2.10885	-0.399822	-1.15207	-3.48457		0.4386	-1.95045	59.9637
P02545	Prelamin-A/C OS=Homo sapiens OX=9606 GN=LMNA PE=1 SV=1	[R].NSNLVGAAHEELQQSR.[I]			235856							17.8475							-0.907096						-4.88107	-0.907096	-4.8831	-4.65474	-4.67313	-4.43088		-1.02916	-0.90132	4.27226
O00299	Chloride intracellular channel protein 1 OS=Homo sapiens OX=9606 GN=CLIC1 PE=1 SV=4	[K].NSNPALNDNLEK.[G]			60861.9	29215.4		11631.6				15.8933	14.8344		13.5058				-2.86139	-2.88588		-2.9734			-4.79185	-2.86139	-2.88588	-4.43246	-2.9734	-4.42614		-0.430959	-0.530703	0.386049
TGME49_254470-t26_1-p1	transcript=TGME49_254470-t26_1 | gene=TGME49_254470 | organism=Toxoplasma_gondii_ME49 | gene_product=hypothetical protein | transcript_product=hypothetical protein | location=TGME49_chrIII:1759224-1763403(+) | protein_length=732 | sequence_SO=chromosome | SO=protein_coding | is_pseudo=false	[K].NSSPMTSDTSTFQGER.[G]					44060.7		48167.8					15.4272		15.5558					-1.46923		-1.43662		-5.07259	-5.39287	-4.8529	-1.46923	-4.72543	-1.43662		2.56236	4.61419	17.6154
TGME49_254470-t26_1-p1	transcript=TGME49_254470-t26_1 | gene=TGME49_254470 | organism=Toxoplasma_gondii_ME49 | gene_product=hypothetical protein | transcript_product=hypothetical protein | location=TGME49_chrIII:1759224-1763403(+) | protein_length=732 | sequence_SO=chromosome | SO=protein_coding | is_pseudo=false	[K].NSSPMTSDTSTFQGER.[G]	1xOxidation [M5]				304327	291944	170034					18.2153	18.1553	17.3755					1.31883	1.67616	0.383058		-5.02392	-5.29489	-4.85592	1.31883	1.67616	0.383058		6.18426	4.61419	17.6154
Q13885	Tubulin beta-2A chain OS=Homo sapiens OX=9606 GN=TUBB2A PE=1 SV=1 Tubulin beta-6 chain OS=Homo sapiens OX=9606 GN=TUBB6 PE=1 SV=1 Tubulin beta chain OS=Homo sapiens OX=9606 GN=TUBB PE=1 SV=2 Tubulin beta-4B chain OS=Homo sapiens OX=9606 GN=TUBB4B PE=1 SV=1 Tubulin beta-2B chain OS=Homo sapiens OX=9606 GN=TUBB2B PE=1 SV=1	[K].NSSYFVEWIPNNVK.[TV]			244584	73261.9						17.9	16.1608						-0.854672	-1.55955					-5.07083	-0.854672	-1.55955	-4.53404	-4.7374	-4.48761		-2.09134	-0.352122	1.0173
O15143	Actin-related protein 2/3 complex subunit 1B OS=Homo sapiens OX=9606 GN=ARPC1B PE=1 SV=3	[K].NSVSQISVLSGGK.[A]		52957.5	261073	108397	38244.6	27396.8	38258.5		15.6925	17.9941	16.726	15.223	14.7417	15.2235		-1.51415	-0.760551	-0.994361	-1.67347	-1.73745	-1.76891		-1.51415	-0.760551	-0.994361	-1.67347	-1.73745	-1.76891		-0.636921	-1.31355	0.959785
P19474	E3 ubiquitin-protein ligase TRIM21 OS=Homo sapiens OX=9606 GN=TRIM21 PE=1 SV=1	[K].NTAPLTLCPLNIGSQGSTDY.[-]	1xCarbamidomethyl [C8]		218947	121826		9530.59	20493.7			17.7402	16.8945		13.2184	14.3229			-1.01442	-0.825857		-3.26082	-2.66951		-4.84146	-1.01442	-0.825857	-4.66984	-3.26082	-2.66951		-1.30614	-1.30475	4.32229
P35579	Myosin-9 OS=Homo sapiens OX=9606 GN=MYH9 PE=1 SV=4	[R].NTDQASMPDNTAAQK.[V]		54914	1.90877e+06	879424	26797.2	36595.1	132004		15.7449	20.8642	19.7462	14.7098	15.1594	17.0102		-1.46182	2.10957	2.02588	-2.18664	-1.31981	0.0178177		-1.46182	2.10957	2.02588	-2.18664	-1.31981	0.0178177		-2.05409	-1.7311	75.0609
P02533	Keratin, type I cytoskeletal 14 OS=Homo sapiens OX=9606 GN=KRT14 PE=1 SV=4 Keratin, type I cytoskeletal 17 OS=Homo sapiens OX=9606 GN=KRT17 PE=1 SV=2	[K].NHEEEMNALR.[G]	1xOxidation [M6]		331563			53462.4	23516.7			18.3389			15.7062	14.5214			-0.415721			-0.772934	-2.471		-4.93189	-0.415721	-4.69811	-4.42819	-0.772934	-2.471		0.791196	0.0182555	0.0639849
P35580	Myosin-10 OS=Homo sapiens OX=9606 GN=MYH10 PE=1 SV=3	[K].QTKVEGELEEMER.[K]	1xOxidation [M11]		211786	69746.5						17.6923	16.0898						-1.0624	-1.63049					-4.99771	-1.0624	-1.63049	-4.66747	-4.65482	-4.61308		-2.08159	-1.95045	59.9637
P35579	Myosin-9 OS=Homo sapiens OX=9606 GN=MYH9 PE=1 SV=4	[K].IRELESQISELQEDLESER.[A]			771248	175214			50153.6			19.5568	17.4188			15.6141			0.80219	-0.301562			-1.37834		-4.96637	0.80219	-0.301562	-4.64834	-4.64395	-1.37834		-2.06829	-1.7311	75.0609
Q9H444	Charged multivesicular body protein 4b OS=Homo sapiens OX=9606 GN=CHMP4B PE=1 SV=1	[R].LRDTEEMLSK.[K]	1xOxidation [M7]	14186			723684	604860	299882		13.7922			19.465	19.2062	18.194		-3.41452			2.56856	2.72707	1.20163		-3.41452	-5.34376	-4.91883	2.56856	2.72707	1.20163		6.7248	5.60781	13.6126
TGME49_268790-t26_1-p1	transcript=TGME49_268790-t26_1 | gene=TGME49_268790 | organism=Toxoplasma_gondii_ME49 | gene_product=hypothetical protein | transcript_product=hypothetical protein | location=TGME49_chrVIII:6291325-6292083(+) | protein_length=252 | sequence_SO=chromosome | SO=protein_coding | is_pseudo=false	[K].LDLSSISSSIQQVPAR.[E]					69893.6		59460.6					16.0929		15.8596					-0.803563		-1.13276		-5.00575	-5.3618	-4.90865	-0.803563	-4.64645	-1.13276		2.89781	3.5902	3.55223
Q15293	Reticulocalbin-1 OS=Homo sapiens OX=9606 GN=RCN1 PE=1 SV=1	[R].IDNDGDGFVTTEELK.[T]			84158.9							16.3608							-2.39382						-4.88544	-2.39382	-4.91707	-4.6336	-4.89576	-4.40981		-0.580946	-0.560595	0.968335
Q99816	Tumor susceptibility gene 101 protein OS=Homo sapiens OX=9606 GN=TSG101 PE=1 SV=2	[R].LDQEVAEVDKNIELLK.[K]					161603		142155					17.3021		17.1171					0.405655		0.124702		-4.86871	-5.22831	-4.6813	0.405655	-4.69208	0.124702		3.53886	3.85389	6.46034
TGME49_254470-t26_1-p1	transcript=TGME49_254470-t26_1 | gene=TGME49_254470 | organism=Toxoplasma_gondii_ME49 | gene_product=hypothetical protein | transcript_product=hypothetical protein | location=TGME49_chrIII:1759224-1763403(+) | protein_length=732 | sequence_SO=chromosome | SO=protein_coding | is_pseudo=false	[R].LDREMGQEGNLDER.[M]	1xOxidation [M5]	22165.3			184311	116568	57566		14.436			17.4918	16.8308	15.8129		-2.77069			0.595346	0.351645	-1.17947		-2.77069	-5.18664	-4.95817	0.595346	0.351645	-1.17947		4.22767	4.61419	17.6154
TGME49_200360-t26_1-p1	transcript=TGME49_200360-t26_1 | gene=TGME49_200360 | organism=Toxoplasma_gondii_ME49 | gene_product=hypothetical protein | transcript_product=hypothetical protein | location=TGME49_chrVIII:6824629-6825189(+) | protein_length=186 | sequence_SO=chromosome | SO=protein_coding | is_pseudo=false	[R].LDRPGDSPGYYVEAK.[Q]			31731.2		295093	50202.6	135419			14.9536		18.1708	15.6155	17.0471			-3.80103		1.27438	-0.863699	0.0546675		-4.79914	-3.80103	-4.91884	1.27438	-0.863699	0.0546675		4.66145	3.66911	2.13296
P04264	Keratin, type II cytoskeletal 1 OS=Homo sapiens OX=9606 GN=KRT1 PE=1 SV=6	[R].LDSELKNMQDMVEDYR.[N]	1xOxidation [M11]		202153							17.6251							-1.12956						-4.97971	-1.12956	-4.9611	-4.68883	-4.81235	-4.48483		-0.971881	-0.0837483	0.431184
P09493	Tropomyosin alpha-1 chain OS=Homo sapiens OX=9606 GN=TPM1 PE=1 SV=2 Tropomyosin beta chain OS=Homo sapiens OX=9606 GN=TPM2 PE=1 SV=1 Tropomyosin alpha-3 chain OS=Homo sapiens OX=9606 GN=TPM3 PE=1 SV=2	[K].LDKENAIDR.[A]			366946	126856	34917.2	33172.3				18.4852	16.9528	15.0917	15.0177				-0.269436	-0.767485	-1.80478	-1.46148			-5.07522	-0.269436	-0.767485	-1.80478	-1.46148	-4.53912		-0.564413	-0.922806	4.58781
P04264	Keratin, type II cytoskeletal 1 OS=Homo sapiens OX=9606 GN=KRT1 PE=1 SV=6	[R].LDSELKNMQDMVEDYR.[N]	2xOxidation [M8	134900	4.14907e+06	67223.8	48114.4	68239.1	693371		17.0415	21.9844	16.0367	15.5542	16.0583	19.4033		-0.165176	3.22971	-1.68364	-1.34226	-0.420862	2.41087		-0.165176	3.22971	-1.68364	-1.34226	-0.420862	2.41087		-0.244383	-0.0837483	0.431184
P47929	Galectin-7 OS=Homo sapiens OX=9606 GN=LGALS7 PE=1 SV=2	[R].LDTSEVVFNSK.[E]		18098.7				16777.1	56854.5		14.1436				14.0342	15.795		-3.0631				-2.44496	-1.19742		-3.0631	-5.31847	-4.85714	-4.69607	-2.44496	-1.19742		1.63342	0.959841	1.05243
Q9Y6C2	EMILIN-1 OS=Homo sapiens OX=9606 GN=EMILIN1 PE=1 SV=3	[R].LDTVAGGLQGLR.[E]		283833	274446	109633	61075.5	87416.3	116898		18.1147	18.0662	16.7423	15.8983	16.4156	16.8349		0.907982	-0.688481	-0.977996	-0.998129	-0.0635574	-0.157511		0.907982	-0.688481	-0.977996	-0.998129	-0.0635574	-0.157511		-0.153568	-1.37014	6.27959
P21333	Filamin-A OS=Homo sapiens OX=9606 GN=FLNA PE=1 SV=4	[K].LDVQFSGLTK.[G]			218134	94419.3		13009.6	56244.6			17.7349	16.5268		13.6673	15.7794			-1.01979	-1.19353		-2.81189	-1.21297		-4.81585	-1.01979	-1.19353	-4.52613	-2.81189	-1.21297		-0.507273	-0.801463	6.54648
Q969G5	Caveolae-associated protein 3 OS=Homo sapiens OX=9606 GN=CAVIN3 PE=1 SV=3	[R].LEANHGLLVAR.[G]		344979	507169	161508	52686	60057.9	80021.5		18.3962	18.9521	17.3012	15.6851	15.8741	16.2881		1.18945	0.197463	-0.419077	-1.2113	-0.605107	-0.704302		1.18945	0.197463	-0.419077	-1.2113	-0.605107	-0.704302		-1.16285	-1.17185	2.32598
Q13765	Nascent polypeptide-associated complex subunit alpha OS=Homo sapiens OX=9606 GN=NACA PE=1 SV=1	[K].IEDLSQQAQLAAAEK.[F]							52513.7							15.6804							-1.312		-4.92284	-5.22226	-4.81575	-4.61116	-4.73522	-1.312		1.43416	1.32629	0.968425
P62750	60S ribosomal protein L23a OS=Homo sapiens OX=9606 GN=RPL23A PE=1 SV=1	[K].IEDNNTLVFIVDVK.[A]			572511	412093	119713	44503.7	155412			19.1269	18.6526	16.8692	15.4416	17.2457			0.372299	0.93229	-0.0272195	-1.03753	0.253335		-4.86929	0.372299	0.93229	-0.0272195	-1.03753	0.253335		0.917761	-0.330071	0.980072
P62263	40S ribosomal protein S14 OS=Homo sapiens OX=9606 GN=RPS14 PE=1 SV=3	[R].IEDVTPIPSDSTR.[R]		779647	1.80986e+06	1.26149e+06	589587	491188	467140		19.5725	20.7874	20.2667	19.1693	18.9059	18.8335		2.36576	2.0328	2.54638	2.27291	2.42674	1.84109		2.36576	2.0328	2.54638	2.27291	2.42674	1.84109		-0.134731	-0.540914	1.31712
P02545	Prelamin-A/C OS=Homo sapiens OX=9606 GN=LMNA PE=1 SV=1	[R].IDSLSAQLSQLQK.[Q]		72570.1	297976	87489.4			47272.7		16.1471	18.1848	16.4168			15.5287		-1.05962	-0.569809	-1.3035			-1.46368		-1.05962	-0.569809	-1.3035	-4.54244	-4.71743	-1.46368		-2.59688	-0.90132	4.27226
P67936	Tropomyosin alpha-4 chain OS=Homo sapiens OX=9606 GN=TPM4 PE=1 SV=3 Tropomyosin alpha-1 chain OS=Homo sapiens OX=9606 GN=TPM1 PE=1 SV=2 Tropomyosin beta chain OS=Homo sapiens OX=9606 GN=TPM2 PE=1 SV=1 Tropomyosin alpha-3 chain OS=Homo sapiens OX=9606 GN=TPM3 PE=1 SV=2	[K].LEEAEKAADESER.[G]		262551	6.18044e+06	2.30761e+06	434439	508254	692352		18.0022	22.5593	21.138	18.7288	18.9552	19.4011		0.795536	3.80463	3.41765	1.83236	2.47602	2.40874		0.795536	3.80463	3.41765	1.83236	2.47602	2.40874		-0.433566	-1.11715	10.5206
O75683	Surfeit locus protein 6 OS=Homo sapiens OX=9606 GN=SURF6 PE=1 SV=3	[R].LDELRGQDEGKAQELEAK.[M]		36727.5	148828	35678.3	15920.5		16840.4		15.1646	17.1833	15.1228	13.9586		14.0396		-2.04213	-1.57136	-2.59756	-2.93783		-2.95276		-2.04213	-1.57136	-2.59756	-2.93783	-4.64099	-2.95276		-1.44018	-1.14892	1.63513
P29692	Elongation factor 1-delta OS=Homo sapiens OX=9606 GN=EEF1D PE=1 SV=5	[R].IASLEVENQSLR.[G]			70499.8							16.1053							-2.64931						-4.93225	-2.64931	-4.83164	-4.56958	-4.76636	-4.41138		-0.444705	-0.150497	0.103911
Q86VS8	Protein Hook homolog 3 OS=Homo sapiens OX=9606 GN=HOOK3 PE=1 SV=2	[R].LASTGSGQSFLAR.[Q]					101133	48791.3	58695.8					16.6259	15.5743	15.841					-0.270535	-0.904837	-1.15143		-4.96866	-5.39224	-4.94268	-0.270535	-0.904837	-1.15143		4.32559	3.11702	3.2016
P05387	60S acidic ribosomal protein P2 OS=Homo sapiens OX=9606 GN=RPLP2 PE=1 SV=1	[K].LASVPAGGAVAVSAAPGSAAPAAGSAPAAAEEK.[K]		164369	1.00565e+06	581348	150848	177119	333396		17.3266	19.9397	19.149	17.2027	17.4344	18.3469		0.119875	1.18505	1.42872	0.306296	0.955186	1.35448		0.119875	1.18505	1.42872	0.306296	0.955186	1.35448		-0.039231	-0.520351	0.985711
P35527	Keratin, type I cytoskeletal 9 OS=Homo sapiens OX=9606 GN=KRT9 PE=1 SV=3	[R].LASYLDKVQALEEANNDLENK.[I]			1.20668e+07	610381	80125.7		736110			23.5245	19.2194	16.29		19.4896			4.76989	1.49903	-0.606459		2.49716		-5.05808	4.76989	1.49903	-0.606459	-4.85976	2.49716		-1.3933	-0.363396	2.17627
TGME49_269442-t26_1-p1	transcript=TGME49_269442-t26_1 | gene=TGME49_269442 | organism=Toxoplasma_gondii_ME49 | gene_product=calmodulin, putative | transcript_product=calmodulin, putative | location=TGME49_chrVIII:5796611-5797662(-) | protein_length=87 | sequence_SO=chromosome | SO=protein_coding | is_pseudo=false	[K].LASYNPEEELIK.[S]		44744.3	194194	99632.7	83254.8		80934.5		15.4494	17.5671	16.6043	16.3452		16.3045		-1.75729	-1.18751	-1.11599	-0.55119		-0.687934		-1.75729	-1.18751	-1.11599	-0.55119	-4.68278	-0.687934		-0.620372	-0.620372	0.528274
P67936	Tropomyosin alpha-4 chain OS=Homo sapiens OX=9606 GN=TPM4 PE=1 SV=3 Tropomyosin alpha-1 chain OS=Homo sapiens OX=9606 GN=TPM1 PE=1 SV=2 Tropomyosin beta chain OS=Homo sapiens OX=9606 GN=TPM2 PE=1 SV=1 Tropomyosin alpha-3 chain OS=Homo sapiens OX=9606 GN=TPM3 PE=1 SV=2	[R].LATALQKLEEAEK.[A]		665281	2.4452e+07	6.58242e+06	892741	502864	2.49215e+06		19.3436	24.5434	22.6502	19.7679	18.9398	21.249		2.1369	5.7888	4.92987	2.87145	2.46064	4.25656		2.1369	5.7888	4.92987	2.87145	2.46064	4.25656		-1.08898	-1.11715	10.5206
P67936	Tropomyosin alpha-4 chain OS=Homo sapiens OX=9606 GN=TPM4 PE=1 SV=3 Tropomyosin alpha-1 chain OS=Homo sapiens OX=9606 GN=TPM1 PE=1 SV=2 Tropomyosin beta chain OS=Homo sapiens OX=9606 GN=TPM2 PE=1 SV=1 Tropomyosin alpha-3 chain OS=Homo sapiens OX=9606 GN=TPM3 PE=1 SV=2	[R].LATALQKLEEAEKAADESER.[G]		16605.7	4.54703e+07	8.76912e+06	1.12237e+06	40922	4.1608e+06		14.0194	25.4384	23.064	20.0981	15.3206	21.9884		-3.18732	6.68378	5.34368	3.20168	-1.15858	4.99603		-3.18732	6.68378	5.34368	3.20168	-1.15858	4.99603		-0.600339	-1.11715	10.5206
O43852	Calumenin OS=Homo sapiens OX=9606 GN=CALU PE=1 SV=2	[K].IDGDKDGFVTVDELK.[D]			155156							17.2434							-1.51129						-5.0632	-1.51129	-4.74685	-4.63977	-4.74194	-4.53937		-0.866577	0.214061	0.357735
P26373	60S ribosomal protein L13 OS=Homo sapiens OX=9606 GN=RPL13 PE=1 SV=4	[K].LATQLTGPVMPVR.[N]			367172	159736			84887.7			18.4861	17.2853			16.3733			-0.268551	-0.434991			-0.619134		-4.84309	-0.268551	-0.434991	-4.67999	-4.78609	-0.619134		-1.51286	-0.793343	1.63806
P04792	Heat shock protein beta-1 OS=Homo sapiens OX=9606 GN=HSPB1 PE=1 SV=2	[K].LATQSNEITIPVTFESR.[A]		146262	2.38679e+06	1.20287e+06	592824	54175	662593		17.1582	21.1866	20.198	19.1772	15.7253	19.3378		-0.0485031	2.432	2.47773	2.28081	-0.753832	2.34536		-0.0485031	2.432	2.47773	2.28081	-0.753832	2.34536		-0.329627	-0.174985	0.374866
Q13885	Tubulin beta-2A chain OS=Homo sapiens OX=9606 GN=TUBB2A PE=1 SV=1 Tubulin beta-6 chain OS=Homo sapiens OX=9606 GN=TUBB6 PE=1 SV=1 Tubulin beta chain OS=Homo sapiens OX=9606 GN=TUBB PE=1 SV=2 Tubulin beta-4B chain OS=Homo sapiens OX=9606 GN=TUBB4B PE=1 SV=1 Tubulin beta-2B chain OS=Homo sapiens OX=9606 GN=TUBB2B PE=1 SV=1	[K].LAVNMVPFPR.[L]	1xOxidation [M5]	98120.5	1.00983e+06	255693	162539	33309.7	134791		16.5823	19.9457	17.9641	17.3104	15.0237	17.0404		-0.624436	1.19103	0.243733	0.413994	-1.45552	0.0479625		-0.624436	1.19103	0.243733	0.413994	-1.45552	0.0479625		-0.601297	-0.352122	1.0173
P60709	Actin, cytoplasmic 1 OS=Homo sapiens OX=9606 GN=ACTB PE=1 SV=1	[K].LCYVALDFEQEMATAASSSSLEK.[S]	1xCarbamidomethyl [C2]	43591	40405.8			27243.7			15.4117	15.3023			14.7336			-1.79496	-3.45237			-1.74554			-1.79496	-3.45237	-4.96219	-4.45894	-1.74554	-4.52466		-0.173203	-1.70874	12.7917
TGME49_239740-t26_1-p1	transcript=TGME49_239740-t26_1 | gene=TGME49_239740 | organism=Toxoplasma_gondii_ME49 | gene_product=dense granule protein GRA14 | transcript_product=dense granule protein GRA14 | location=TGME49_chrVI:883160-884386(-) | protein_length=408 | sequence_SO=chromosome | SO=protein_coding | is_pseudo=false	[R].LDAAKNEEGFITDLLK.[S]					37388.1		119220					15.1903		16.8633					-1.70615		-0.129132		-4.88241	-5.33719	-4.70919	-1.70615	-4.89376	-0.129132		2.73325	5.93448	38.4972
P35580	Myosin-10 OS=Homo sapiens OX=9606 GN=MYH10 PE=1 SV=3	[K].LDAQVQELHAK.[V]			151187	79265.8						17.206	16.2744						-1.54868	-1.44591					-4.92732	-1.54868	-1.44591	-4.70031	-4.84534	-4.40369		-2.00914	-1.95045	59.9637
P13667	Protein disulfide-isomerase A4 OS=Homo sapiens OX=9606 GN=PDIA4 PE=1 SV=2	[K].IDATSASVLASR.[F]			49676.8				30770.8			15.6003				14.9093			-3.15436				-2.08313		-5.0142	-3.15436	-4.87676	-4.63376	-4.7769	-2.08313		0.517178	0.517178	0.611909
P26373	60S ribosomal protein L13 OS=Homo sapiens OX=9606 GN=RPL13 PE=1 SV=4	[K].LATQLTGPVMPVR.[N]	1xOxidation [M10]	211667	514748	204185	42463.7	119352	124848		17.6914	18.9735	17.6395	15.3739	16.8649	16.9298		0.484731	0.218862	-0.0808035	-1.52249	0.385696	-0.0625932		0.484731	0.218862	-0.0808035	-1.52249	0.385696	-0.0625932		-0.607394	-0.793343	1.63806
P35579	Myosin-9 OS=Homo sapiens OX=9606 GN=MYH9 PE=1 SV=4	[K].IAQLEEQLDNETKER.[Q]		545890	1.41085e+07	5.57472e+06	686332	406937	1.72856e+06		19.0583	23.7501	22.4105	19.3885	18.6344	20.7211		1.85155	4.99542	4.69015	2.49211	2.15527	3.72874		1.85155	4.99542	4.69015	2.49211	2.15527	3.72874		-1.05366	-1.7311	75.0609
P35579	Myosin-9 OS=Homo sapiens OX=9606 GN=MYH9 PE=1 SV=4	[K].LEEEQIILEDQNCK.[L]	1xCarbamidomethyl [C13]		84747.2							16.3709							-2.38377						-4.92863	-2.38377	-4.73066	-4.54952	-4.70444	-4.40539		-0.538765	-1.7311	75.0609
P18583	Protein SON OS=Homo sapiens OX=9606 GN=SON PE=1 SV=4	[K].IEEVLSGVLDTELR.[Y]			113556	119600	29532.6		35709.4			16.793	16.8679	14.85		15.124			-1.9616	-0.852462	-2.04641		-1.86839		-4.98076	-1.9616	-0.852462	-2.04641	-4.86396	-1.86839		-0.327979	0.230246	0.639001
Q14103	Heterogeneous nuclear ribonucleoprotein D0 OS=Homo sapiens OX=9606 GN=HNRNPD PE=1 SV=1	[K].IFVGGLSPDTPEEK.[I]			44675.1							15.4472							-3.30746						-5.02764	-3.30746	-4.75025	-4.43811	-4.79118	-4.6508		-0.264912	-0.264912	0.575769
Q13428	Treacle protein OS=Homo sapiens OX=9606 GN=TCOF1 PE=1 SV=3	[K].LGAGEGGEASVSPEK.[T]		144094	134377	131221	79240.9	78300	98034.2		17.1367	17.0359	17.0016	16.274	16.2567	16.581		-0.070047	-1.71872	-0.718685	-0.622479	-0.222447	-0.411405		-0.070047	-1.71872	-0.718685	-0.622479	-0.222447	-0.411405		0.417041	0.290875	0.456564
Q9Y4F1	FERM, ARHGEF and pleckstrin domain-containing protein 1 OS=Homo sapiens OX=9606 GN=FARP1 PE=1 SV=1	[R].LGAPENSGISTLER.[G]			123758	72936.3						16.9172	16.1543						-1.83748	-1.56597					-4.9623	-1.83748	-1.56597	-4.68945	-4.62853	-4.45019		-1.80081	-1.80081	2.05977
P08670	Vimentin OS=Homo sapiens OX=9606 GN=VIM PE=1 SV=4	[R].LGDLYEEEMR.[E]	1xOxidation [M9]	774117	4.09344e+06	1.48432e+06	334808	267318	595997		19.5622	21.9649	20.5014	18.353	18.0282	19.1849		2.35549	3.21024	2.78105	1.45654	1.54903	2.19254		2.35549	3.21024	2.78105	1.45654	1.54903	2.19254		-1.04956	-1.45396	18.1104
P19474	E3 ubiquitin-protein ligase TRIM21 OS=Homo sapiens OX=9606 GN=TRIM21 PE=1 SV=1	[R].LGDTQQSIPGNEER.[F]		125953	435338	280569	44632.4	51885.7	47967.6		16.9425	18.7318	18.098	15.4458	15.663	15.5498		-0.264177	-0.0228674	0.377676	-1.45063	-0.816123	-1.44263		-0.264177	-0.0228674	0.377676	-1.45063	-0.816123	-1.44263		-1.26667	-1.30475	4.32229
P23528	Cofilin-1 OS=Homo sapiens OX=9606 GN=CFL1 PE=1 SV=3	[K].LGGSAVISLEGKPL.[-]		72604	523291	304322	160580	51045.6	200887		16.1478	18.9973	18.2152	17.2929	15.6395	17.616		-1.05894	0.242607	0.494916	0.3965	-0.839673	0.623624		-1.05894	0.242607	0.494916	0.3965	-0.839673	0.623624		0.16729	-0.119042	0.0816903
P30101	Protein disulfide-isomerase A3 OS=Homo sapiens OX=9606 GN=PDIA3 PE=1 SV=4	[K].IFRDGEEAGAYDGPR.[T]			25062.8	12524.5			8536.58			14.6133	13.6125			13.0594			-4.14139	-4.10785			-3.93296		-4.83996	-4.14139	-4.10785	-4.6708	-4.78422	-3.93296		-0.0995942	-0.0304122	0.0533733
P06702	Protein S100-A9 OS=Homo sapiens OX=9606 GN=S100A9 PE=1 SV=1	[K].LGHPDTLNQGEFK.[E]		29210.4	237209	80073.1	39970	206557	447650		14.8342	17.8558	16.289	15.2866	17.6562	18.772		-2.37251	-0.898849	-1.43129	-1.60981	1.17701	1.77961		-2.37251	-0.898849	-1.43129	-1.60981	1.17701	1.77961		2.01649	2.11927	5.16912
P81605	Dermcidin OS=Homo sapiens OX=9606 GN=DCD PE=1 SV=2	[K].LGKDAVEDLESVGK.[G]		459337	3.70844e+06	1.64344e+06	804072	976506	3250473		18.8092	21.8224	20.6483	19.617	19.8973	21.6322		1.60249	3.06774	2.92796	2.72053	3.4181	4.63982		1.60249	3.06774	2.92796	2.72053	3.4181	4.63982		1.06008	1.30769	2.64405
Q9BU76	Multiple myeloma tumor-associated protein 2 OS=Homo sapiens OX=9606 GN=MMTAG2 PE=1 SV=1	[K].LGLSVFTHHR.[V]		105081	331678	244706	90153.2	38521.2	142877		16.6811	18.3394	17.9007	16.4601	15.2334	17.1244		-0.525564	-0.415223	0.180368	-0.436344	-1.24581	0.132009		-0.525564	-0.415223	0.180368	-0.436344	-1.24581	0.132009		-0.263242	-0.303794	0.479278
P08708	40S ribosomal protein S17 OS=Homo sapiens OX=9606 GN=RPS17 PE=1 SV=2	[R].LGNDFHTNK.[R]		1.90485e+06	6.85986e+06	2.848e+06	755902	883470	845336		20.8612	22.7097	21.4415	19.5278	19.7528	19.6892		3.65454	3.9551	3.7212	2.6314	3.27365	2.69676		3.65454	3.9551	3.7212	2.6314	3.27365	2.69676		-0.909677	-1.23491	4.32648
P08708	40S ribosomal protein S17 OS=Homo sapiens OX=9606 GN=RPS17 PE=1 SV=2	[R].LGNDFHTNKR.[V]		5.09451e+06	1.86822e+07	8.22239e+06	1.83456e+06	2.74293e+06	2.08034e+06		22.2805	24.1552	22.9711	20.807	21.3873	20.9884		5.07381	5.40052	5.2508	3.91057	4.90811	3.99598		5.07381	5.40052	5.2508	3.91057	4.90811	3.99598		-0.970156	-1.23491	4.32648
P98095	Fibulin-2 OS=Homo sapiens OX=9606 GN=FBLN2 PE=1 SV=2	[R].IGPAPAFTGDTIALNIIK.[G]			67419.5							16.0409							-2.71377						-4.88259	-2.71377	-4.9209	-4.5261	-4.73281	-4.6499		-0.463854	-0.660873	1.56843
P35580	Myosin-10 OS=Homo sapiens OX=9606 GN=MYH10 PE=1 SV=3	[K].IGQLEEQLEQEAK.[E]		96445.4	4466344	1.88226e+06	103175	40591.8	285613		16.5574	22.0907	20.844	16.6547	15.3089	18.1237		-0.649278	3.33602	3.12372	-0.241696	-1.17027	1.1313		-0.649278	3.33602	3.12372	-0.241696	-1.17027	1.1313		-2.03037	-1.95045	59.9637
P06702	Protein S100-A9 OS=Homo sapiens OX=9606 GN=S100A9 PE=1 SV=1	[K].LGHPDTLNQGEFKELVR.[K]							90412.2							16.4642							-0.528172		-5.02471	-5.36218	-4.70317	-4.66233	-4.79629	-0.528172		1.70109	2.11927	5.16912
TGME49_270240-t26_1-p1	transcript=TGME49_270240-t26_1 | gene=TGME49_270240 | organism=Toxoplasma_gondii_ME49 | gene_product=MAG1 | transcript_product=MAG1 | location=TGME49_chrVIII:5312269-5313737(+) | protein_length=452 | sequence_SO=chromosome | SO=protein_coding | is_pseudo=false	[K].LEEIDDLLQLTR.[A]					51233.1		48020.7					15.6448		15.5514					-1.25165		-1.44103		-4.8355	-5.39134	-4.84919	-1.25165	-4.7486	-1.44103		2.54492	4.92705	34.9346
P62753	40S ribosomal protein S6 OS=Homo sapiens OX=9606 GN=RPS6 PE=1 SV=1	[K].LFNLSKEDDVR.[Q]		498797	3.14168e+06	1.25336e+06	289589	202289	381172		18.9281	21.5831	20.2574	18.1436	17.6261	18.5401		1.72139	2.82846	2.53705	1.24721	1.14688	1.54768		1.72139	2.82846	2.53705	1.24721	1.14688	1.54768		-1.04838	-0.930869	2.99966
P38159	RNA-binding motif protein, X chromosome OS=Homo sapiens OX=9606 GN=RBMX PE=1 SV=3	[K].LFIGGLNTETNEK.[A]		16292.9							13.992							-3.21475							-3.21475	-5.1688	-4.86603	-4.57816	-4.79929	-4.68182		-0.269898	-0.308142	0.218475
P98160	Basement membrane-specific heparan sulfate proteoglycan core protein OS=Homo sapiens OX=9606 GN=HSPG2 PE=1 SV=4	[R].LEGDTLIIPR.[V]		45691.8	56350.1				12474.1		15.4796	15.7821				13.6066		-1.72706	-2.97251				-3.38575		-1.72706	-2.97251	-4.78285	-4.48892	-4.67819	-3.38575		-1.02348	-0.74156	0.54629
Q07065	Cytoskeleton-associated protein 4 OS=Homo sapiens OX=9606 GN=CKAP4 PE=1 SV=2	[R].LEGLGSSEADQDGLASTVR.[S]			259560	97868.4	50978.3	25689.1	122627			17.9857	16.5786	15.6376	14.6489	16.9039			-0.768939	-1.14177	-1.25884	-1.83031	-0.0884831		-5.08257	-0.768939	-1.14177	-1.25884	-1.83031	-0.0884831		1.27188	0.114884	0.322937
Q8N1N4	Keratin, type II cytoskeletal 78 OS=Homo sapiens OX=9606 GN=KRT78 PE=1 SV=2	[K].IEIDPQFQVVR.[T]			178697				18111.8			17.4472				14.1446			-1.30749				-2.84776		-5.07946	-1.30749	-4.78312	-4.43597	-4.66056	-2.84776		-0.258071	-0.330554	0.526944
TGME49_229480-t26_1-p1	transcript=TGME49_229480-t26_1 | gene=TGME49_229480 | organism=Toxoplasma_gondii_ME49 | gene_product=calcium binding protein precursor, putative | transcript_product=calcium binding protein precursor, putative | location=TGME49_chrVIII:292754-295302(-) | protein_length=335 | sequence_SO=chromosome | SO=protein_coding | is_pseudo=false	[K].IEIEEILNAQDK.[N]					130485	33157.3	221956					16.9935	15.017	17.7599					0.0970886	-1.46213	0.767515		-4.79126	-5.15736	-4.71421	0.0970886	-1.46213	0.767515		4.68843	4.48727	20.0107
TGME49_229480-t26_1-p1	transcript=TGME49_229480-t26_1 | gene=TGME49_229480 | organism=Toxoplasma_gondii_ME49 | gene_product=calcium binding protein precursor, putative | transcript_product=calcium binding protein precursor, putative | location=TGME49_chrVIII:292754-295302(-) | protein_length=335 | sequence_SO=chromosome | SO=protein_coding | is_pseudo=false	[K].IEIEEILNAQDKNGDR.[K]							67063.3							16.0332							-0.959167		-4.86597	-5.25188	-4.85532	-4.6308	-4.89614	-0.959167		1.49569	4.48727	20.0107
TGME49_229480-t26_1-p1	transcript=TGME49_229480-t26_1 | gene=TGME49_229480 | organism=Toxoplasma_gondii_ME49 | gene_product=calcium binding protein precursor, putative | transcript_product=calcium binding protein precursor, putative | location=TGME49_chrVIII:292754-295302(-) | protein_length=335 | sequence_SO=chromosome | SO=protein_coding | is_pseudo=false	[K].IEIEEILNAQDKNGDRK.[I]					79866.8		73810.9					16.2853		16.1715					-0.611128		-0.820856		-4.92197	-5.12078	-4.84553	-0.611128	-4.86324	-0.820856		2.86435	4.48727	20.0107
O43795	Unconventional myosin-Ib OS=Homo sapiens OX=9606 GN=MYO1B PE=1 SV=3	[R].IFLLTNNNLLLADQK.[S]			68006.2							16.0534							-2.70127						-4.97495	-2.70127	-4.82124	-4.60697	-4.818	-4.439		-0.455506	-0.529763	0.549792
P13645	Keratin, type I cytoskeletal 10 OS=Homo sapiens OX=9606 GN=KRT10 PE=1 SV=6	[R].LENEIQTYR.[S]		145438	2.87858e+06	365039	174598	324285	390618		17.15	21.4569	18.4777	17.4137	18.3069	18.5754		-0.0566529	2.70228	0.757371	0.517241	1.82773	1.583		-0.0566529	2.70228	0.757371	0.517241	1.82773	1.583		0.17499	-0.141331	0.518507
Q05682	Caldesmon OS=Homo sapiens OX=9606 GN=CALD1 PE=1 SV=3	[R].LEQYTSAIEGTK.[S]			214492	76336.9			65893			17.7106	16.2201			16.0078			-1.04408	-1.50023			-0.984565		-4.88846	-1.04408	-1.50023	-4.57036	-4.86923	-0.984565		-0.997128	-0.394802	0.713066
Q07065	Cytoskeleton-associated protein 4 OS=Homo sapiens OX=9606 GN=CKAP4 PE=1 SV=2	[K].IETNENNLESAK.[G]		6556149	11352046	5.67949e+06	2.2587e+06	2.33875e+06	2.31344e+06		22.6444	23.4364	22.4373	21.1071	21.1573	21.1416		5.43771	4.6818	4.71701	4.21062	4.67813	4.1492		5.43771	4.6818	4.71701	4.21062	4.67813	4.1492		-0.599523	0.114884	0.322937
P35579	Myosin-9 OS=Homo sapiens OX=9606 GN=MYH9 PE=1 SV=4	[R].LEVNLQAMK.[A]	1xOxidation [M8]	79087.1	2.19095e+06	828992	45831	178114	254451		16.2712	21.0631	19.661	15.484	17.4424	17.957		-0.935548	2.30848	1.94068	-1.4124	0.963272	0.964625		-0.935548	2.30848	1.94068	-1.4124	0.963272	0.964625		-0.932704	-1.7311	75.0609
P04792	Heat shock protein beta-1 OS=Homo sapiens OX=9606 GN=HSPB1 PE=1 SV=2	[R].LFDQAFGLPR.[L]		18899	219202	294168	54140	9449.9	81419.9		14.206	17.7419	18.1663	15.7244	13.2061	16.3131		-3.00068	-1.01275	0.445959	-1.17203	-3.27309	-0.679308		-3.00068	-1.01275	0.445959	-1.17203	-3.27309	-0.679308		-0.518985	-0.174985	0.374866
P10909	Clusterin OS=Homo sapiens OX=9606 GN=CLU PE=1 SV=1	[K].LFDSDPITVTVPVEVSR.[K]			113185		29225.9		56859.5			16.7883		14.835		15.7951			-1.96632		-2.06148		-1.19729		-5.03611	-1.96632	-4.78154	-2.06148	-4.72834	-1.19729		1.26562	1.21566	2.42838
O14773	Tripeptidyl-peptidase 1 OS=Homo sapiens OX=9606 GN=TPP1 PE=1 SV=2	[R].LFGGNFAHQASVAR.[V]			270952	96426.5			33281.5			18.0477	16.5571			15.0224			-0.706969	-1.16318			-1.96997		-4.9123	-0.706969	-1.16318	-4.5168	-4.73118	-1.96997		-1.4785	-1.37151	0.998864
P35579	Myosin-9 OS=Homo sapiens OX=9606 GN=MYH9 PE=1 SV=4	[K].IAQLEEQLDNETK.[E]		269243	5.36515e+06	2.23562e+06	160503	248742	629275		18.0386	22.3552	21.0922	17.2922	17.9243	19.2633		0.831849	3.60054	3.37192	0.395805	1.44512	2.27093		0.831849	3.60054	3.37192	0.395805	1.44512	2.27093		-1.23082	-1.7311	75.0609
P35580	Myosin-10 OS=Homo sapiens OX=9606 GN=MYH10 PE=1 SV=3	[R].IAQLEEELEEEQSNMELLNDR.[F]	1xOxidation [M15]		350666	82933.9						18.4197	16.3397						-0.334909	-1.38065					-4.98122	-0.334909	-1.38065	-4.50429	-4.69904	-4.52438		-2.34364	-1.95045	59.9637
P35579	Myosin-9 OS=Homo sapiens OX=9606 GN=MYH9 PE=1 SV=4	[R].IAQLEEELEEEQGNTELINDRLK.[K]			1.12955e+06	183440						20.1073	17.4849						1.35267	-0.235373					-4.97765	1.35267	-0.235373	-4.46422	-4.68787	-4.46758		-3.25311	-1.7311	75.0609
P62805	Histone H4 OS=Homo sapiens OX=9606 GN=HIST1H4A PE=1 SV=2	[R].KTVTAMDVVYALK.[R]			118497	34611.2	18305.2	12501.8	18749.4			16.8545	15.079	14.16	13.6098	14.1946			-1.90015	-2.64137	-2.73647	-2.86933	-2.79785		-5.05709	-1.90015	-2.64137	-2.73647	-2.86933	-2.79785		0.398321	-1.9663	8.7918
P62805	Histone H4 OS=Homo sapiens OX=9606 GN=HIST1H4A PE=1 SV=2	[R].KTVTAMDVVYALK.[R]	1xOxidation [M6]	1.72717e+06	992196	205140		34857.7	115775		20.72	19.9203	17.6462		15.0892	16.821		3.51328	1.16562	-0.074072		-1.38998	-0.171433		3.51328	1.16562	-0.074072	-4.42731	-1.38998	-0.171433		-3.53118	-1.9663	8.7918
P62805	Histone H4 OS=Homo sapiens OX=9606 GN=HIST1H4A PE=1 SV=2	[R].KTVTAMDVVYALKR.[Q]			250959	122422		120105	142990			17.9371	16.9015		16.8739	17.1256			-0.817556	-0.818813		0.394765	0.133154		-5.03797	-0.817556	-0.818813	-4.45753	0.394765	0.133154		0.914909	-1.9663	8.7918
P62805	Histone H4 OS=Homo sapiens OX=9606 GN=HIST1H4A PE=1 SV=2	[R].KTVTAMDVVYALKR.[Q]	1xOxidation [M6]	1.3996e+06	781957	157595	19193.3	17772.4	131171		20.4166	19.5767	17.2659	14.2283	14.1173	17.0011		3.20988	0.822084	-0.454463	-2.66812	-2.36182	0.0086845		3.20988	0.822084	-0.454463	-2.66812	-2.36182	0.0086845		-2.86626	-1.9663	8.7918
P35580	Myosin-10 OS=Homo sapiens OX=9606 GN=MYH10 PE=1 SV=3	[K].KVDDDLGTIESLEEAK.[K]			1.72503e+06	537650			97525.6			20.7182	19.0363			16.5735			1.96355	1.31599			-0.418909		-4.8068	1.96355	1.31599	-4.53499	-4.77839	-0.418909		-2.73501	-1.95045	59.9637
P35580	Myosin-10 OS=Homo sapiens OX=9606 GN=MYH10 PE=1 SV=3	[K].KVDDDLGTIESLEEAKK.[K]		41134.5	2.59425e+06	891068			136466		15.3281	21.3069	19.7652			17.0582		-1.87864	2.55224	2.04486			0.0657844		-1.87864	2.55224	2.04486	-4.65626	-4.65389	0.0657844		-3.98761	-1.95045	59.9637
Q8WVK2	U4/U6.U5 small nuclear ribonucleoprotein 27 kDa protein OS=Homo sapiens OX=9606 GN=SNRNP27 PE=1 SV=1	[K].KVDGSVNAYAINVSQK.[R]							112222							16.776							-0.216405		-4.86469	-5.26353	-4.85202	-4.63934	-4.81262	-0.216405		1.77062	1.77062	1.47352
TGME49_230705-t26_1-p1	transcript=TGME49_230705-t26_1 | gene=TGME49_230705 | organism=Toxoplasma_gondii_ME49 | gene_product=hypothetical protein | transcript_product=hypothetical protein | location=TGME49_chrVIII:990431-991782(-) | protein_length=266 | sequence_SO=chromosome | SO=protein_coding | is_pseudo=false	[R].KTTPDEGFVNSFPESR.[E]					165148	13832.4	99941.7					17.3334	13.7558	16.6088					0.436966	-2.72341	-0.383603		-4.88476	-5.16976	-4.76829	0.436966	-2.72341	-0.383603		4.05092	3.40572	8.14165
P35579	Myosin-9 OS=Homo sapiens OX=9606 GN=MYH9 PE=1 SV=4	[K].KVEAQLQELQVK.[F]		254518	5.146e+06	1.78294e+06	88046.5	238783	676550		17.9574	22.295	20.7658	16.426	17.8653	19.3678		0.750705	3.54037	3.04551	-0.470458	1.38617	2.37544		0.750705	3.54037	3.04551	-0.470458	1.38617	2.37544		-1.34848	-1.7311	75.0609
TGME49_227280-t26_1-p1	transcript=TGME49_227280-t26_1 | gene=TGME49_227280 | organism=Toxoplasma_gondii_ME49 | gene_product=dense granule protein GRA3 | transcript_product=dense granule protein GRA3 | location=TGME49_chrX:1049243-1049905(-) | protein_length=220 | sequence_SO=chromosome | SO=protein_coding | is_pseudo=false	[K].KVEEELSLLR.[R]					377000	167476	371956					18.5242	17.3536	18.5048					1.62777	0.874423	1.51237		-4.99047	-5.29112	-4.70557	1.62777	0.874423	1.51237		6.33391	3.69319	3.62394
P08670	Vimentin OS=Homo sapiens OX=9606 GN=VIM PE=1 SV=4	[R].KVESLQEEIAFLK.[K]		46160.1	5.00985e+06	1.12633e+06	246901		422010		15.4944	22.2563	20.1032	17.9136		18.6869		-1.71234	3.50169	2.38287	1.01714		1.69452		-1.71234	3.50169	2.38287	1.01714	-4.62684	1.69452		-2.02914	-1.45396	18.1104
P08670	Vimentin OS=Homo sapiens OX=9606 GN=VIM PE=1 SV=4	[R].KVESLQEEIAFLKK.[L]		17431.7	2.09843e+06	477113	116960		212622		14.0894	21.0009	18.864	16.8357		17.6979		-3.11727	2.24623	1.14365	-0.0607848		0.705527		-3.11727	2.24623	1.14365	-0.0607848	-4.77438	0.705527		-1.46742	-1.45396	18.1104
P35580	Myosin-10 OS=Homo sapiens OX=9606 GN=MYH10 PE=1 SV=3	[K].KVIQYLAHVASSHK.[G]			432431	102948			24949.5			18.7221	16.6516			14.6067			-0.0325358	-1.06876			-2.38568		-4.79482	-0.0325358	-1.06876	-4.52717	-4.71607	-2.38568		-1.91093	-1.95045	59.9637
P35579	Myosin-9 OS=Homo sapiens OX=9606 GN=MYH9 PE=1 SV=4	[K].KVIQYLAYVASSHK.[S]			334459	86161.6			35135.2			18.3515	16.3948			15.1006			-0.403177	-1.32556			-1.89177		-4.96552	-0.403177	-1.32556	-4.69375	-4.62317	-1.89177		-1.50481	-1.7311	75.0609
TGME49_275470-t26_1-p1	transcript=TGME49_275470-t26_1 | gene=TGME49_275470 | organism=Toxoplasma_gondii_ME49 | gene_product=dense granule protein GRA15 | transcript_product=dense granule protein GRA15 | location=TGME49_chrX:7287059-7288711(+) | protein_length=550 | sequence_SO=chromosome | SO=protein_coding | is_pseudo=false	[R].KVPEGAQLPTSSTPHAQR.[K]					142344	81607.1	112619					17.119	16.3164	16.7811					0.222587	-0.162765	-0.211311		-4.96573	-5.2484	-4.89913	0.222587	-0.162765	-0.211311		4.98726	4.44009	12.9114
P02768	Serum albumin OS=Homo sapiens OX=9606 GN=ALB PE=1 SV=2	[K].KVPQVSTPTLVEVSR.[N]		2.155e+06	2.85402e+06	3.15846e+06	1.54089e+06	1.15122e+06	1.71156e+06		21.0393	21.4446	21.5908	20.5553	20.1347	20.7069		3.83255	2.68992	3.87047	3.6589	3.65555	3.71448		3.83255	2.68992	3.87047	3.6589	3.65555	3.71448		0.211997	0.712437	0.953818
Q13185	Chromobox protein homolog 3 OS=Homo sapiens OX=9606 GN=CBX3 PE=1 SV=4	[K].KVEEAEPEEFVVEK.[V]		108707					16237.5		16.7301					13.987		-0.476616					-3.00536		-0.476616	-5.1717	-4.86545	-4.5635	-4.61242	-3.00536		-0.555835	-0.846662	0.625345
Q92522	Histone H1x OS=Homo sapiens OX=9606 GN=H1FX PE=1 SV=1	[K].KVPWFDQQNGR.[T]		17499.9	204311	52635.9	27121.4		35067.6		14.0951	17.6404	15.6838	14.7271		15.0979		-3.11164	-1.11424	-2.03656	-2.16929		-1.89455		-3.11164	-1.11424	-2.03656	-2.16929	-4.81363	-1.89455		-0.871676	-1.28741	2.94362
P35580	Myosin-10 OS=Homo sapiens OX=9606 GN=MYH10 PE=1 SV=3	[R].KTTLQVDTLNAELAAER.[S]			2.41325e+06	829885	64821.4		179926			21.2025	19.6626	15.9842		17.457			2.4479	1.94223	-0.912254		0.464642		-4.86486	2.4479	1.94223	-0.912254	-4.75382	0.464642		-1.57557	-1.95045	59.9637
P10909	Clusterin OS=Homo sapiens OX=9606 GN=CLU PE=1 SV=1	[R].KTLLSNLEEAKK.[K]					21145.8	16954	22662.4					14.3681	14.0493	14.468					-2.52835	-2.42984	-2.52439		-4.91747	-5.19444	-4.72867	-2.52835	-2.42984	-2.52439		2.45267	1.21566	2.42838
P04264	Keratin, type II cytoskeletal 1 OS=Homo sapiens OX=9606 GN=KRT1 PE=1 SV=6	[K].KQISNLQQSISDAEQR.[G]			1.69749e+06	171540	46655.5	59004.1	158618			20.695	17.3882	15.5098	15.8485	17.2752			1.94033	-0.332135	-1.38668	-0.630645	0.282792		-5.0738	1.94033	-0.332135	-1.38668	-0.630645	0.282792		0.577026	-0.0837483	0.431184
P62847	40S ribosomal protein S24 OS=Homo sapiens OX=9606 GN=RPS24 PE=1 SV=1	[R].KQMVIDVLHPGK.[A]			2.29531e+06	808933	186581		389419			21.1303	19.6257	17.5094		18.571			2.37561	1.90534	0.613003		1.57856		-5.0329	2.37561	1.90534	0.613003	-4.80172	1.57856		-0.619399	-1.50999	4.38185
P62847	40S ribosomal protein S24 OS=Homo sapiens OX=9606 GN=RPS24 PE=1 SV=1	[R].KQMVIDVLHPGK.[A]	1xOxidation [M3]	684486	2.23086e+06	731198	379459	498364	359289		19.3847	21.0892	19.4799	18.5336	18.9268	18.4548		2.17796	2.33452	1.75958	1.63715	2.44767	1.46238		2.17796	2.33452	1.75958	1.63715	2.44767	1.46238		-0.241621	-1.50999	4.38185
P17096	High mobility group protein HMG-I/HMG-Y OS=Homo sapiens OX=9606 GN=HMGA1 PE=1 SV=3	[R].KQPPVSPGTALVGSQKEPSEVPTPK.[R]							208021							17.6664							0.673965		-4.86765	-5.15213	-4.87204	-4.4991	-4.626	0.673965		2.1469	1.58236	1.13598
Q969Q0	60S ribosomal protein L36a-like OS=Homo sapiens OX=9606 GN=RPL36AL PE=1 SV=3 60S ribosomal protein L36a OS=Homo sapiens OX=9606 GN=RPL36A PE=1 SV=2	[R].KQSGYGGQTKPIFR.[K]		54250.9	211389	41145.7		47784.1	54367		15.7274	17.6895	15.3285		15.5442	15.7304		-1.47934	-1.0651	-2.39187		-0.934931	-1.26196		-1.47934	-1.0651	-2.39187	-4.63198	-0.934931	-1.26196		-0.630851	-0.223267	0.374694
P43235	Cathepsin K OS=Homo sapiens OX=9606 GN=CTSK PE=1 SV=1	[R].KQYNNKVDEISR.[R]				38146.5							15.2193							-2.50106					-4.88396	-5.34926	-2.50106	-4.41287	-4.65262	-4.56904		-0.300084	-0.300084	0.383702
P61247	40S ribosomal protein S3a OS=Homo sapiens OX=9606 GN=RPS3A PE=1 SV=2	[R].KTSYAQHQQVR.[Q]				366734		112735					18.4844		16.7826					0.764052		0.3034			-4.84393	-5.35832	0.764052	-4.50104	0.3034	-4.57355		0.222335	-0.976845	5.34325
P35579	Myosin-9 OS=Homo sapiens OX=9606 GN=MYH9 PE=1 SV=4	[K].KRHEMPPHIYAITDTAYR.[S]	1xOxidation [M5]		1.1011e+06	324544	22500.8		97803.1			20.0705	18.3081	14.4577		16.5776			1.31588	0.587735	-2.43874		-0.414809		-4.88906	1.31588	0.587735	-2.43874	-4.72999	-0.414809		-1.5327	-1.7311	75.0609
P18621	60S ribosomal protein L17 OS=Homo sapiens OX=9606 GN=RPL17 PE=1 SV=3	[K].KSAEFLLHMLK.[N]	1xOxidation [M9]	2.81832e+06	1.86914e+07	5.3282e+06	2.20962e+06	1.1656e+06	2.04282e+06		21.4264	24.1559	22.3452	21.0754	20.1526	20.9621		4.2197	5.40123	4.6249	4.17893	3.67347	3.96973		4.2197	5.40123	4.6249	4.17893	3.67347	3.96973		-0.807899	-0.745061	2.51651
P11021	Endoplasmic reticulum chaperone BiP OS=Homo sapiens OX=9606 GN=HSPA5 PE=1 SV=2	[K].KSDIDEIVLVGGSTR.[I]			204231	54822.9						17.6398	15.7425						-1.1148	-1.97783					-4.84069	-1.1148	-1.97783	-4.49252	-4.81898	-4.49389		-1.95736	-0.218298	0.708121
P07910	Heterogeneous nuclear ribonucleoproteins C1/C2 OS=Homo sapiens OX=9606 GN=HNRNPC PE=1 SV=4	[K].KSDVEAIFSK.[Y]		26483.2					13001.6		14.6928					13.6664		-2.51391					-3.326		-2.51391	-5.24898	-4.85647	-4.51658	-4.8721	-3.326		-0.0317742	-0.56118	0.85365
P21333	Filamin-A OS=Homo sapiens OX=9606 GN=FLNA PE=1 SV=4	[K].KTHIQDNHDGTYTVAYVPDVTGR.[Y]			216621	65225.4			56118			17.7248	15.9931			15.7762			-1.02983	-1.72717			-1.21623		-4.85864	-1.02983	-1.72717	-4.52546	-4.81968	-1.21623		-0.981905	-0.801463	6.54648
P35579	Myosin-9 OS=Homo sapiens OX=9606 GN=MYH9 PE=1 SV=4	[K].KTLEEEAKTHEAQIQEMR.[Q]			148340							17.1785							-1.5761						-4.93606	-1.5761	-4.79415	-4.67951	-4.90373	-4.57003		-0.948987	-1.7311	75.0609
P35579	Myosin-9 OS=Homo sapiens OX=9606 GN=MYH9 PE=1 SV=4	[K].KTLEEEAKTHEAQIQEMR.[Q]	1xOxidation [M17]	46495.9	1.75988e+06	678791	105343	12688	116837		15.5048	20.747	19.3726	16.6847	13.6312	16.8341		-1.70189	1.9924	1.65229	-0.211696	-2.84799	-0.158268		-1.70189	1.9924	1.65229	-0.211696	-2.84799	-0.158268		-1.72025	-1.7311	75.0609
Q9BRT6	Protein LLP homolog OS=Homo sapiens OX=9606 GN=LLPH PE=1 SV=1	[K].KTLLDQHGQYPIWMNQR.[Q]	1xOxidation [M14]		160536	44300.5	19151	12540.9	26032.2			17.2925	15.435	14.2251	13.6144	14.668			-1.46211	-2.28528	-2.67131	-2.86482	-2.32439		-5.00684	-1.46211	-2.28528	-2.67131	-2.86482	-2.32439		0.297908	-0.790296	1.45553
P18621	60S ribosomal protein L17 OS=Homo sapiens OX=9606 GN=RPL17 PE=1 SV=3	[K].KSAEFLLHMLK.[N]			1.1849e+06	128930			223992			20.1763	16.9762			17.7731			1.42169	-0.744093			0.780689		-4.80022	1.42169	-0.744093	-4.49887	-4.86131	0.780689		-1.48562	-0.745061	2.51651
P61247	40S ribosomal protein S3a OS=Homo sapiens OX=9606 GN=RPS3A PE=1 SV=2	[K].KWQTMIEAHVDVK.[T]	1xOxidation [M5]	18588.1	180737	129759	69295.2	36871.1	33329.9		14.1821	17.4635	16.9855	16.0805	15.1702	15.0245		-3.02461	-1.29111	-0.734849	-0.815969	-1.30897	-1.96787		-3.02461	-1.29111	-0.734849	-0.815969	-1.30897	-1.96787		0.319253	-0.976845	5.34325
P35908	Keratin, type II cytoskeletal 2 epidermal OS=Homo sapiens OX=9606 GN=KRT2 PE=1 SV=2 Keratin, type II cytoskeletal 2 oral OS=Homo sapiens OX=9606 GN=KRT76 PE=1 SV=2 Keratin, type II cytoskeletal 3 OS=Homo sapiens OX=9606 GN=KRT3 PE=1 SV=3	[K].KYEDEINKR.[T]		369071	7.29098e+06	116876	363683	442205	1.32931e+06		18.4935	22.7977	16.8346	18.4723	18.7544	20.3422		1.28683	4.04304	-0.885697	1.57589	2.27518	3.34984		1.28683	4.04304	-0.885697	1.57589	2.27518	3.34984		0.918913	0.181252	0.903762
TGME49_311260-t26_1-p1	transcript=TGME49_311260-t26_1 | gene=TGME49_311260 | organism=Toxoplasma_gondii_ME49 | gene_product=myosin light chain MLC1, putative | transcript_product=myosin light chain MLC1, putative | location=TGME49_chrXI:1929840-1930665(+) | protein_length=137 | sequence_SO=chromosome | SO=protein_coding | is_pseudo=false	[R].LAGASPSNGEVAEFAGK.[M]		19564.6	95955.6	51722.2	23866.9	30194.2	70686		14.256	16.5501	15.6585	14.5427	14.882	16.1091		-2.95075	-2.20457	-2.06183	-2.35371	-1.59719	-0.883265		-2.95075	-2.20457	-2.06183	-2.35371	-1.59719	-0.883265		0.794324	0.794324	2.29908
Q9Y608	Leucine-rich repeat flightless-interacting protein 2 OS=Homo sapiens OX=9606 GN=LRRFIP2 PE=1 SV=1	[K].LAGEKEELLSQIR.[K]			463985	68070.9						18.8237	16.0548						0.0690746	-1.66557					-4.79525	0.0690746	-1.66557	-4.41607	-4.84055	-4.42306		-2.42931	-1.52753	6.05819
TGME49_251540-t26_1-p1	transcript=TGME49_251540-t26_1 | gene=TGME49_251540 | organism=Toxoplasma_gondii_ME49 | gene_product=dense granule protein GRA9 | transcript_product=dense granule protein GRA9 | location=TGME49_chrXII:5450509-5452072(+) | protein_length=318 | sequence_SO=chromosome | SO=protein_coding | is_pseudo=false	[K].LAGWTDNTHTATAGTPK.[K]		17815.4		39098.2	408711	168815	300855		14.1208		15.2548	18.6407	17.3651	18.1987		-3.08587		-2.46551	1.74429	0.885914	1.20631		-3.08587	-5.3657	-2.46551	1.74429	0.885914	1.20631		4.91786	5.26774	9.74639
P08708	40S ribosomal protein S17 OS=Homo sapiens OX=9606 GN=RPS17 PE=1 SV=2	[K].IAGYVTHLMK.[R]			18094038	6.59734e+06	689598		1.84832e+06			24.109	22.6535	19.3954		20.8178			5.35437	4.93313	2.49896		3.82538		-4.79586	5.35437	4.93313	2.49896	-4.64481	3.82538		-1.2707	-1.23491	4.32648
P08708	40S ribosomal protein S17 OS=Homo sapiens OX=9606 GN=RPS17 PE=1 SV=2	[K].IAGYVTHLMK.[R]	1xOxidation [M9]	5.05117e+06	1.73785e+07	6.51746e+06	2951979	3.0409e+06	2.2701e+06		22.2682	24.0508	22.6359	21.4933	21.5361	21.1143		5.06148	5.29616	4.91556	4.59681	5.05689	4.12192		5.06148	5.29616	4.91556	4.59681	5.05689	4.12192		-0.499189	-1.23491	4.32648
P04264	Keratin, type II cytoskeletal 1 OS=Homo sapiens OX=9606 GN=KRT1 PE=1 SV=6 Keratin, type II cytoskeletal 80 OS=Homo sapiens OX=9606 GN=KRT80 PE=1 SV=2 Keratin, type II cytoskeletal 4 OS=Homo sapiens OX=9606 GN=KRT4 PE=1 SV=4	[K].LALDIEIATYR.[TK]		48754.3	4.11858e+06	1.08132e+06	383350	103545	893354		15.5732	21.9737	20.0444	18.5483	16.6599	19.7689		-1.63346	3.21907	2.32404	1.65187	0.180723	2.77647		-1.63346	3.21907	2.32404	1.65187	0.180723	2.77647		0.233138	-0.0837483	0.431184
P62269	40S ribosomal protein S18 OS=Homo sapiens OX=9606 GN=RPS18 PE=1 SV=3	[K].IAFAITAIK.[G]		319774	2.29702e+06	842933	247988	302374	405977		18.2867	21.1313	19.6851	17.9199	18.206	18.631		1.07999	2.37669	1.96474	1.02347	1.7268	1.63864		1.07999	2.37669	1.96474	1.02347	1.7268	1.63864		-0.344167	-0.612376	1.94788
Q5XKE5	Keratin, type II cytoskeletal 79 OS=Homo sapiens OX=9606 GN=KRT79 PE=1 SV=2 Keratin, type II cytoskeletal 2 epidermal OS=Homo sapiens OX=9606 GN=KRT2 PE=1 SV=2 Keratin, type II cytoskeletal 6B OS=Homo sapiens OX=9606 GN=KRT6B PE=1 SV=5 Keratin, type II cytoskeletal 6A OS=Homo sapiens OX=9606 GN=KRT6A PE=1 SV=3 Keratin, type II cytoskeletal 2 oral OS=Homo sapiens OX=9606 GN=KRT76 PE=1 SV=2 Keratin…	[K].LALDVEIATYR.[K]		29850.8	1.76748e+06	342572	127915	43967.3	333632		14.8655	20.7533	18.386	16.9648	15.4241	18.3479		-2.34122	1.99861	0.665728	0.0683848	-1.05503	1.3555		-2.34122	1.99861	0.665728	0.0683848	-1.05503	1.3555		0.0152435	-0.384744	0.814255
TGME49_270250-t26_1-p1	transcript=TGME49_270250-t26_1 | gene=TGME49_270250 | organism=Toxoplasma_gondii_ME49 | gene_product=dense granule protein GRA1 | transcript_product=dense granule protein GRA1 | location=TGME49_chrVIII:5310153-5310860(-) | protein_length=190 | sequence_SO=chromosome | SO=protein_coding | is_pseudo=false	[K].IAIKTSDGSYSEVGNVNMEEVIDTMK.[S]	2xOxidation [M18				103300							16.6565							-0.23996				-4.93158	-5.17158	-4.69182	-0.23996	-4.75922	-4.64558		1.71674	5.87075	10.4661
TGME49_203310-t26_1-p1	transcript=TGME49_203310-t26_1 | gene=TGME49_203310 | organism=Toxoplasma_gondii_ME49 | gene_product=dense granule protein GRA7 | transcript_product=dense granule protein GRA7 | location=TGME49_chrVIIa:2604424-2605134(+) | protein_length=236 | sequence_SO=chromosome | SO=protein_coding | is_pseudo=false	[K].LALPAVGMGASYFAADR.[I]	1xOxidation [M8]		1.12019e+06	442182	426627		434418			20.0953	18.7543	18.7026		18.7287			1.34067	1.03396	1.80618		1.73632		-4.95815	1.34067	1.03396	1.80618	-4.7428	1.73632		0.461077	3.58578	18.7485
P18124	60S ribosomal protein L7 OS=Homo sapiens OX=9606 GN=RPL7 PE=1 SV=1	[R].IALTDNALIAR.[S]			56961.3		28054.1		24096.2			15.7977		14.7759		14.5565			-2.95695		-2.12051		-2.43589		-4.99594	-2.95695	-4.73734	-2.12051	-4.64487	-2.43589		1.16299	1.16299	1.64083
P21333	Filamin-A OS=Homo sapiens OX=9606 GN=FLNA PE=1 SV=4	[R].IANLQTDLSDGLR.[L]			201150	92273.6			49030.1			17.6179	16.4936			15.5814			-1.13674	-1.22669			-1.41102		-4.98392	-1.13674	-1.22669	-4.63625	-4.84477	-1.41102		-1.18156	-0.801463	6.54648
P62750	60S ribosomal protein L23a OS=Homo sapiens OX=9606 GN=RPL23A PE=1 SV=1	[R].LAPDYDALDVANK.[I]		7.81655e+06	2.44754e+07	1.20732e+07	4.80935e+06	5.01164e+06	7.20268e+06		22.8981	24.5448	23.5253	22.1974	22.2569	22.7801		5.6914	5.79018	5.80499	5.30098	5.77768	5.7877		5.6914	5.79018	5.80499	5.30098	5.77768	5.7877		-0.140072	-0.330071	0.980072
P62750	60S ribosomal protein L23a OS=Homo sapiens OX=9606 GN=RPL23A PE=1 SV=1	[R].LAPDYDALDVANKIGII.[-]			89885.2							16.4558							-2.29885						-4.94853	-2.29885	-4.88354	-4.52765	-4.70384	-4.4079		-0.502823	-0.330071	0.980072
P35579	Myosin-9 OS=Homo sapiens OX=9606 GN=MYH9 PE=1 SV=4	[R].IAQLEEELEEEQGNTELINDR.[L]			2.81128e+06	905008			144638			21.4228	19.7876			17.1421			2.66815	2.06725			0.149681		-5.01078	2.66815	2.06725	-4.53082	-4.79996	0.149681		-2.96858	-1.7311	75.0609
Q5XKE5	Keratin, type II cytoskeletal 79 OS=Homo sapiens OX=9606 GN=KRT79 PE=1 SV=2 Keratin, type II cytoskeletal 2 epidermal OS=Homo sapiens OX=9606 GN=KRT2 PE=1 SV=2 Keratin, type II cytoskeletal 6B OS=Homo sapiens OX=9606 GN=KRT6B PE=1 SV=5 Keratin, type II cytoskeletal 6A OS=Homo sapiens OX=9606 GN=KRT6A PE=1 SV=3 Keratin, type II cytoskeletal 2 oral OS=Homo sapiens OX=9606 GN=KRT76 PE=1 SV=2 Keratin…	[K].LALDVEIATYRK.[L]		46556.2	299064				57031.7		15.5067	18.1901				15.7995		-1.70002	-0.564549				-1.19293		-1.70002	-0.564549	-4.93401	-4.5032	-4.76735	-1.19293		-1.0883	-0.384744	0.814255
Q9NQ29	Putative RNA-binding protein Luc7-like 1 OS=Homo sapiens OX=9606 GN=LUC7L PE=1 SV=1	[R].LAETQEEISAEVSAK.[A]							45217.1							15.4646							-1.52782		-4.96626	-5.41352	-4.77548	-4.64299	-4.67242	-1.52782		1.43735	0.795586	0.587041
Q9Y383	Putative RNA-binding protein Luc7-like 2 OS=Homo sapiens OX=9606 GN=LUC7L2 PE=1 SV=2	[R].LAETQEEISAEVAAKAER.[V]							46114.7							15.4929							-1.49946		-4.8194	-5.27921	-4.68216	-4.43822	-4.71668	-1.49946		1.37547	0.418591	0.610412
Q9Y383	Putative RNA-binding protein Luc7-like 2 OS=Homo sapiens OX=9606 GN=LUC7L2 PE=1 SV=2	[R].LAETQEEISAEVAAK.[A]		122474	393817	296565	81234.3	68000.5	569752		16.9021	18.5872	18.178	16.3098	16.0533	19.12		-0.304584	-0.16748	0.457667	-0.586634	-0.425914	2.12757		-0.304584	-0.16748	0.457667	-0.586634	-0.425914	2.12757		0.376474	0.418591	0.610412
P62241	40S ribosomal protein S8 OS=Homo sapiens OX=9606 GN=RPS8 PE=1 SV=2	[R].KYELGRPAANTK.[I]		185487	549966	174716	43251.2	74930.4	95361.5		17.501	19.069	17.4147	15.4005	16.1933	16.5411		0.294253	0.314337	-0.30567	-1.49598	-0.285909	-0.451283		0.294253	0.314337	-0.30567	-1.49598	-0.285909	-0.451283		-0.845365	-1.26318	2.87779
P55072	Transitional endoplasmic reticulum ATPase OS=Homo sapiens OX=9606 GN=VCP PE=1 SV=4	[R].KYEMFAQTLQQSR.[G]	1xOxidation [M4]	54704.8							15.7394							-1.46732							-1.46732	-5.389	-4.78267	-4.58279	-4.63195	-4.67153		-0.749095	-0.749095	0.733502
P42766	60S ribosomal protein L35 OS=Homo sapiens OX=9606 GN=RPL35 PE=1 SV=2	[K].KYKPLDLRPK.[K]		7.69741e+06	3.28722e+07	1.13423e+07	4.18824e+06	4.45705e+06	4.81407e+06		22.8759	24.9704	23.4352	21.9979	22.0877	22.1988		5.66924	6.21572	5.71489	5.10148	5.60849	5.20642		5.66924	6.21572	5.71489	5.10148	5.60849	5.20642		-0.561155	-0.538575	1.2191
P04792	Heat shock protein beta-1 OS=Homo sapiens OX=9606 GN=HSPB1 PE=1 SV=2	[R].KYTLPPGVDPTQVSSSLSPEGTLTVEAPMPK.[L]	1xOxidation [M29]		452184	211939	50640.7		68726.7			18.7866	17.6933	15.628		16.0686			0.0319057	-0.0270345	-1.26843		-0.92382		-4.88009	0.0319057	-0.0270345	-1.26843	-4.62455	-0.92382		-0.647192	-0.174985	0.374866
Q86VY4	Testis-specific Y-encoded-like protein 5 OS=Homo sapiens OX=9606 GN=TSPYL5 PE=1 SV=2	[R].LAADTVFVGTAGTVGRPK.[N]			197278	80848	38337.3					17.5899	16.3029	15.2265					-1.16477	-1.4174	-1.66998				-4.95216	-1.16477	-1.4174	-1.66998	-4.79926	-4.43442		-1.12311	-1.68756	1.20143
O00299	Chloride intracellular channel protein 1 OS=Homo sapiens OX=9606 GN=CLIC1 PE=1 SV=4	[K].LAALNPESNTAGLDIFAK.[F]			107472							16.7136							-2.04104						-4.88472	-2.04104	-4.86329	-4.50723	-4.68428	-4.48888		-0.630447	-0.530703	0.386049
Q15084	Protein disulfide-isomerase A6 OS=Homo sapiens OX=9606 GN=PDIA6 PE=1 SV=1	[K].LAAVDATVNQVLASR.[Y]			74401.9							16.1831							-2.57159						-4.8543	-2.57159	-4.80199	-4.51863	-4.67281	-4.48246		-0.482005	-0.697776	0.513124
P02545	Prelamin-A/C OS=Homo sapiens OX=9606 GN=LMNA PE=1 SV=1	[R].LADALQELR.[A]		172190	359546	121963	44919.8	47783.2	91343.1		17.3936	18.4558	16.8961	15.4551	15.5442	16.479		0.186943	-0.298829	-0.82424	-1.44137	-0.934956	-0.513395		0.186943	-0.298829	-0.82424	-1.44137	-0.934956	-0.513395		-0.651199	-0.90132	4.27226
P28289	Tropomodulin-1 OS=Homo sapiens OX=9606 GN=TMOD1 PE=1 SV=1	[R].LADLTGPIIPK.[C]			168908	51741.6						17.3659	15.659						-1.38877	-2.06129					-5.01541	-1.38877	-2.06129	-4.52036	-4.75039	-4.62256		-1.80928	-1.6954	1.89085
P35580	Myosin-10 OS=Homo sapiens OX=9606 GN=MYH10 PE=1 SV=3	[R].IAECSSQLAEEEEKAK.[N]	1xCarbamidomethyl [C4]		91996.3	30064.2						16.4893	14.8758						-2.26536	-2.84456					-5.03303	-2.26536	-2.84456	-4.59774	-4.64149	-4.52011		-1.20546	-1.95045	59.9637
P35579	Myosin-9 OS=Homo sapiens OX=9606 GN=MYH9 PE=1 SV=4	[R].IAEFTTNLTEEEEK.[S]		73711.3	3.08966e+06	1.24663e+06	70633.6	77382.2	315365		16.1696	21.559	20.2496	16.1081	16.2397	18.2667		-1.0371	2.80437	2.52928	-0.78837	-0.239459	1.27426		-1.0371	2.80437	2.52928	-0.78837	-0.239459	1.27426		-1.35004	-1.7311	75.0609
P35579	Myosin-9 OS=Homo sapiens OX=9606 GN=MYH9 PE=1 SV=4	[R].IAEFTTNLTEEEEKSK.[S]		318103	1.31689e+07	6.39346e+06	429342	241322	1.25354e+06		18.2791	23.6506	22.6082	18.7118	17.8806	20.2576		1.07243	4.89599	4.88784	1.81533	1.40143	3.26518		1.07243	4.89599	4.88784	1.81533	1.40143	3.26518		-1.45811	-1.7311	75.0609
P13647	Keratin, type II cytoskeletal 5 OS=Homo sapiens OX=9606 GN=KRT5 PE=1 SV=3	[K].LAELEEALQK.[A]			796958	146110		47417.9	81750.6			19.6041	17.1567		15.5331	16.3189			0.849499	-0.563627		-0.946028	-0.67346		-4.92746	0.849499	-0.563627	-4.62421	-0.946028	-0.67346		-0.534038	0.091607	0.259862
TGME49_229480-t26_1-p1	transcript=TGME49_229480-t26_1 | gene=TGME49_229480 | organism=Toxoplasma_gondii_ME49 | gene_product=calcium binding protein precursor, putative | transcript_product=calcium binding protein precursor, putative | location=TGME49_chrVIII:292754-295302(-) | protein_length=335 | sequence_SO=chromosome | SO=protein_coding | is_pseudo=false	[K].LAELMQMDVK.[D]							41293.4							15.3336							-1.65878		-4.95277	-5.20158	-4.7014	-4.65791	-4.85208	-1.65878		1.22899	4.48727	20.0107
TGME49_229480-t26_1-p1	transcript=TGME49_229480-t26_1 | gene=TGME49_229480 | organism=Toxoplasma_gondii_ME49 | gene_product=calcium binding protein precursor, putative | transcript_product=calcium binding protein precursor, putative | location=TGME49_chrVIII:292754-295302(-) | protein_length=335 | sequence_SO=chromosome | SO=protein_coding | is_pseudo=false	[K].LAELMQMDVK.[D]	1xOxidation [M]				216173		258143					17.7218		17.9778					0.82539		0.985407		-5.05408	-5.17979	-4.93143	0.82539	-4.76372	0.985407		4.07079	4.48727	20.0107
TGME49_229480-t26_1-p1	transcript=TGME49_229480-t26_1 | gene=TGME49_229480 | organism=Toxoplasma_gondii_ME49 | gene_product=calcium binding protein precursor, putative | transcript_product=calcium binding protein precursor, putative | location=TGME49_chrVIII:292754-295302(-) | protein_length=335 | sequence_SO=chromosome | SO=protein_coding | is_pseudo=false	[K].LAELMQMDVK.[D]	2xOxidation [M5				213083	300784	140638					17.7011	18.1984	17.1016					0.804621	1.71919	0.109223		-4.99659	-5.29703	-4.93928	0.804621	1.71919	0.109223		5.95531	4.48727	20.0107
P14923	Junction plakoglobin OS=Homo sapiens OX=9606 GN=JUP PE=1 SV=3	[R].LAEPSQLLK.[S]		27797.7	334325	30828.7	34142.2	38978.2	75042.8		14.7627	18.3509	14.912	15.0593	15.2504	16.1954		-2.44403	-0.403754	-2.80833	-1.83717	-1.22879	-0.796976		-2.44403	-0.403754	-2.80833	-1.83717	-1.22879	-0.796976		0.597726	0.51872	0.666005
P35580	Myosin-10 OS=Homo sapiens OX=9606 GN=MYH10 PE=1 SV=3	[K].IGQLEEQLEQEAKER.[A]			2.76602e+06	873819	95056.5		114793			21.3994	19.737	16.5365		16.8087			2.64474	2.01665	-0.359938		-0.183723		-4.85895	2.64474	2.01665	-0.359938	-4.75816	-0.183723		-1.70142	-1.95045	59.9637
Q16643	Drebrin OS=Homo sapiens OX=9606 GN=DBN1 PE=1 SV=4	[R].LREDENAEPVGTTYQK.[T]			42196.9							15.3648							-3.3898						-5.05783	-3.3898	-4.83643	-4.70147	-4.79099	-4.48051		-0.229638	-0.241231	0.169266
P62263	40S ribosomal protein S14 OS=Homo sapiens OX=9606 GN=RPS14 PE=1 SV=3	[K].IGRIEDVTPIPSDSTR.[R]		1.19243e+06	3.04674e+06	2.01934e+06	1.37293e+06	557561	766379		20.1855	21.5388	20.9455	20.3888	19.0888	19.5477		2.97877	2.78419	3.22513	3.4924	2.6096	2.5553		2.97877	2.78419	3.22513	3.4924	2.6096	2.5553		-0.110267	-0.540914	1.31712
O00159	Unconventional myosin-Ic OS=Homo sapiens OX=9606 GN=MYO1C PE=1 SV=4	[R].LGTDEISPR.[V]		65004.8	638708	352627	26208	40116.5	84352		15.9883	19.2848	18.4278	14.6777	15.2919	16.3641		-1.21844	0.530151	0.707463	-2.21872	-1.18726	-0.628268		-1.21844	0.530151	0.707463	-2.21872	-1.18726	-0.628268		-1.35114	-1.70343	8.7537
P24844	Myosin regulatory light polypeptide 9 OS=Homo sapiens OX=9606 GN=MYL9 PE=1 SV=4 Myosin regulatory light chain 12B OS=Homo sapiens OX=9606 GN=MYL12B PE=1 SV=2	[K].LNGTDPEDVIR.[N]		3.76098e+06	6.15411e+07	2.93127e+07	3.11122e+06	2.65651e+06	4.51565e+06		21.8427	25.875	24.805	21.569	21.3411	22.1065		4.63597	7.1204	7.0847	4.67261	4.86193	5.1141		4.63597	7.1204	7.0847	4.67261	4.86193	5.1141		-1.39748	-1.54272	5.32423
P42766	60S ribosomal protein L35 OS=Homo sapiens OX=9606 GN=RPL35 PE=1 SV=2	[R].LNKHEENLK.[T]		6.35498e+06	2.20683e+07	9030565	3.7563e+06	3.59701e+06	3.40487e+06		22.5995	24.3955	23.1064	21.8409	21.7784	21.6992		5.39275	5.64083	5.38606	4.94445	5.29919	4.70677		5.39275	5.64083	5.38606	4.94445	5.29919	4.70677		-0.489747	-0.538575	1.2191
P26447	Protein S100-A4 OS=Homo sapiens OX=9606 GN=S100A4 PE=1 SV=1	[K].LNKSELKELLTR.[E]			82723.6		50463.6		29222.3			16.336		15.623		14.8348			-2.41863		-1.27348		-2.15762		-4.93223	-2.41863	-4.91623	-1.27348	-4.74394	-2.15762		1.36402	0.0142197	0.0231893
P09382	Galectin-1 OS=Homo sapiens OX=9606 GN=LGALS1 PE=1 SV=2	[R].LNLEAINYMAADGDFK.[I]	1xOxidation [M9]		1.64824e+06	619162	149555	11404.8	138505			20.6525	19.24	17.1903	13.4774	17.0796			1.89785	1.51964	0.293883	-3.00182	0.0871734		-5.08388	1.89785	1.51964	0.293883	-3.00182	0.0871734		-0.318122	-0.932788	2.61615
P09382	Galectin-1 OS=Homo sapiens OX=9606 GN=LGALS1 PE=1 SV=2	[R].LNLEAINYMAADGDFKIK.[C]	1xOxidation [M9]	23249.6	68021.1	48610.5	18570.8	17068.9			14.5049	16.0537	15.569	14.1807	14.0591			-2.70178	-2.70095	-2.15134	-2.71569	-2.42009			-2.70178	-2.70095	-2.15134	-2.71569	-2.42009	-4.54028		-0.707325	-0.932788	2.61615
P62753	40S ribosomal protein S6 OS=Homo sapiens OX=9606 GN=RPS6 PE=1 SV=1	[K].LNISFPATGCQK.[L]	1xCarbamidomethyl [C10]	50518	395298	126391	30965.2	28291.3	57548.5		15.6245	18.5926	16.9475	14.9184	14.7881	15.8125		-1.58219	-0.162066	-0.772788	-1.97808	-1.6911	-1.17991		-1.58219	-0.162066	-0.772788	-1.97808	-1.6911	-1.17991		-0.777347	-0.930869	2.99966
P62851	40S ribosomal protein S25 OS=Homo sapiens OX=9606 GN=RPS25 PE=1 SV=1	[K].LNNLVLFDK.[A]		566262	4979740	1.74695e+06	771952	283125	670048		19.1111	22.2476	20.7364	19.5582	18.1111	19.3539		1.90441	3.49299	3.01609	2.66172	1.63191	2.3615		1.90441	3.49299	3.01609	2.66172	1.63191	2.3615		-0.58612	-0.576319	1.22098
P14618	Pyruvate kinase PKM OS=Homo sapiens OX=9606 GN=PKM PE=1 SV=4	[R].LNFSHGTHEYHAETIK.[N]			114408	41395.2	10212.2		44684.8			16.8038	15.3372	13.318		15.4475			-1.95081	-2.38314	-3.57843		-1.54491		-4.93257	-1.95081	-2.38314	-3.57843	-4.80016	-1.54491		-0.21899	0.123496	0.141078
P62851	40S ribosomal protein S25 OS=Homo sapiens OX=9606 GN=RPS25 PE=1 SV=1	[K].LNNLVLFDKATYDK.[L]			456117	82311.4	43763.1		23605.1			18.799	16.3288	15.4174		14.5268			0.044398	-1.39152	-1.47901		-2.46559		-4.8739	0.044398	-1.39152	-1.47901	-4.81223	-2.46559		-0.845271	-0.576319	1.22098
P62829	60S ribosomal protein L23 OS=Homo sapiens OX=9606 GN=RPL23 PE=1 SV=1	[R].LNRLPAAGVGDMVMATVK.[K]	1xOxidation [M]		277059	282080	63495.3		90183.7			18.0798	18.1057	15.9544		16.4606			-0.674813	0.385424	-0.942074		-0.531823		-5.03292	-0.674813	0.385424	-0.942074	-4.76317	-0.531823		-0.304919	-0.407139	0.806291
P62829	60S ribosomal protein L23 OS=Homo sapiens OX=9606 GN=RPL23 PE=1 SV=1	[R].LNRLPAAGVGDMVMATVK.[K]	2xOxidation [M12	382925	462750	262592	208553	241149	129258		18.5467	18.8199	18.0025	17.6701	17.8796	16.9799		1.34	0.065228	0.282142	0.773615	1.40039	-0.0125095		1.34	0.065228	0.282142	0.773615	1.40039	-0.0125095		0.158043	-0.407139	0.806291
P02461	Collagen alpha-1(III) chain OS=Homo sapiens OX=9606 GN=COL3A1 PE=1 SV=4	[K].INTDEIMTSLK.[S]	1xOxidation [M7]	73736.6	113214			34676.2			16.1701	16.7887			15.0817			-1.03661	-1.96595			-1.39752			-1.03661	-1.96595	-4.81054	-4.45972	-1.39752	-4.59529		-0.879811	-0.879811	0.739135
TGME49_221620-t26_1-p1	transcript=TGME49_221620-t26_1 | gene=TGME49_221620 | organism=Toxoplasma_gondii_ME49 | gene_product=beta-tubulin, putative | transcript_product=beta-tubulin, putative | location=TGME49_chrII:489143-491480(-) | protein_length=449 | sequence_SO=chromosome | SO=protein_coding | is_pseudo=false	[R].INVFYNEATGGR.[F]			180955	51471.9	53584.9		55846.7			17.4653	15.6515	15.7095		15.7692			-1.28938	-2.06882	-1.1869		-1.22322		-5.06211	-1.28938	-2.06882	-1.1869	-4.84737	-1.22322		0.387606	-1.19921	2.06204
Q13885	Tubulin beta-2A chain OS=Homo sapiens OX=9606 GN=TUBB2A PE=1 SV=1	[R].INVYYNEAAGNK.[Y]		29926.9	139791	72438.8	27820.6	24751.8	41090.9		14.8692	17.0929	16.1445	14.7639	14.5952	15.3265		-2.33755	-1.66174	-1.57585	-2.13257	-1.88393	-1.66587		-2.33755	-1.66174	-1.57585	-2.13257	-1.88393	-1.66587		-0.0357457	-0.352122	1.0173
P68371	Tubulin beta-4B chain OS=Homo sapiens OX=9606 GN=TUBB4B PE=1 SV=1	[R].INVYYNEATGGK.[Y]		373766	1.51063e+06	646067	346030	201513	306236		18.5118	20.5267	19.3013	18.4005	17.6205	18.2243		1.30507	1.77207	1.581	1.5041	1.14134	1.23188		1.30507	1.77207	1.581	1.5041	1.14134	1.23188		-0.260275	0.454499	0.465018
P68371	Tubulin beta-4B chain OS=Homo sapiens OX=9606 GN=TUBB4B PE=1 SV=1	[R].INVYYNEATGGKYVPR.[A]					34901.7	9283.66						15.091	13.1805						-1.80543	-3.29869			-4.91223	-5.34095	-4.79432	-1.80543	-3.29869	-4.42082		1.84085	0.454499	0.465018
P62829	60S ribosomal protein L23 OS=Homo sapiens OX=9606 GN=RPL23 PE=1 SV=1	[R].LPAAGVGDMVMATVK.[K]	2xOxidation [M9	175404	132701	148622	95324.9	149255	64352.3		17.4203	17.0178	17.1813	16.5406	17.1874	15.9737		0.213618	-1.73683	-0.539028	-0.355871	0.708246	-1.0187		0.213618	-1.73683	-0.539028	-0.355871	0.708246	-1.0187		0.465306	-0.407139	0.806291
P46776	60S ribosomal protein L27a OS=Homo sapiens OX=9606 GN=RPL27A PE=1 SV=2	[R].INFDKYHPGYFGK.[V]		56214.1	5.70664e+06	2.00967e+06	228958	27575.1	1.42106e+06		15.7786	22.4442	20.9385	17.8047	14.7511	20.4385		-1.42806	3.68956	3.21821	0.908287	-1.7281	3.44614		-1.42806	3.68956	3.21821	0.908287	-1.7281	3.44614		-0.951128	-0.721581	1.30584
Q9Y490	Talin-1 OS=Homo sapiens OX=9606 GN=TLN1 PE=1 SV=3	[R].LNEAAAGLNQAATELVQASR.[G]			59630.6							15.8638							-2.89088						-4.86285	-2.89088	-4.75809	-4.6887	-4.79237	-4.51301		-0.494083	-0.494083	0.937981
P60660	Myosin light polypeptide 6 OS=Homo sapiens OX=9606 GN=MYL6 PE=1 SV=2 Myosin light chain 6B OS=Homo sapiens OX=9606 GN=MYL6B PE=1 SV=1	[K].ILYSQCGDVMR.[A]	1xCarbamidomethyl [C6]	588511	5.22546e+06	1.73686e+06	402938	354116	1.16891e+06		19.1667	22.3171	20.7281	18.6202	18.4339	20.1567		1.96001	3.56248	3.00773	1.72376	1.95469	3.16433		1.96001	3.56248	3.00773	1.72376	1.95469	3.16433		-0.56248	-0.835341	2.76722
P06576	ATP synthase subunit beta, mitochondrial OS=Homo sapiens OX=9606 GN=ATP5F1B PE=1 SV=3	[R].IMDPNIVGSEHYDVAR.[G]	1xOxidation [M2]	21843.1	71261.5		18566.8		24300.9		14.4149	16.1208		14.1804		14.5687		-2.79181	-2.63381		-2.716		-2.42368		-2.79181	-2.63381	-4.91113	-2.716	-4.75125	-2.42368		0.148608	0.148608	0.163341
TGME49_239740-t26_1-p1	transcript=TGME49_239740-t26_1 | gene=TGME49_239740 | organism=Toxoplasma_gondii_ME49 | gene_product=dense granule protein GRA14 | transcript_product=dense granule protein GRA14 | location=TGME49_chrVI:883160-884386(-) | protein_length=408 | sequence_SO=chromosome | SO=protein_coding | is_pseudo=false	[K].IMEDHVASVVAGEAQEENVINSQPQGTETSHR.[A]	1xOxidation [M2]				3.91502e+06		3.90162e+06					21.9006		21.8956					5.00415		4.90324		-4.92097	-5.16925	-4.79904	5.00415	-4.67564	4.90324		6.70701	5.93448	38.4972
P61247	40S ribosomal protein S3a OS=Homo sapiens OX=9606 GN=RPS3A PE=1 SV=2	[K].LMELHGEGSSSGK.[A]		275440	2.51839e+06	1.20713e+06	247017	36077.7	392166		18.0714	21.2641	20.2031	17.9143	15.1388	18.5811		0.864678	2.50943	2.48282	1.01782	-1.34035	1.5887		0.864678	2.50943	2.48282	1.01782	-1.34035	1.5887		-1.53025	-0.976845	5.34325
P61247	40S ribosomal protein S3a OS=Homo sapiens OX=9606 GN=RPS3A PE=1 SV=2	[K].LMELHGEGSSSGK.[A]	1xOxidation [M2]	1.1219e+06	2380721	954571	418647	591895	414173		20.0975	21.183	19.8645	18.6754	19.175	18.6599		2.89081	2.42832	2.14417	1.77894	2.69581	1.66747		2.89081	2.42832	2.14417	1.77894	2.69581	1.66747		-0.440362	-0.976845	5.34325
P35579	Myosin-9 OS=Homo sapiens OX=9606 GN=MYH9 PE=1 SV=4	[R].IMGIPEEEQMGLLR.[V]	2xOxidation [M2	91406.4	6.1875e+06	2.30719e+06	136501	56342.8	256801		16.48	22.5609	21.1377	17.0585	15.7819	17.9703		-0.726696	3.80628	3.41738	0.162114	-0.69723	0.977891		-0.726696	3.80628	3.41738	0.162114	-0.69723	0.977891		-2.01806	-1.7311	75.0609
P07437	Tubulin beta chain OS=Homo sapiens OX=9606 GN=TUBB PE=1 SV=2 Tubulin beta-4B chain OS=Homo sapiens OX=9606 GN=TUBB4B PE=1 SV=1	[R].IMNTFSVVPSPK.[V]			449772	183188	14312.6	7021.95	43161.3			18.7788	17.483	13.805	12.7777	15.3975			0.0241883	-0.237352	-3.09143	-3.70152	-1.59495		-4.84649	0.0241883	-0.237352	-3.09143	-3.70152	-1.59495		-1.10941	-0.397563	0.718845
P07437	Tubulin beta chain OS=Homo sapiens OX=9606 GN=TUBB PE=1 SV=2 Tubulin beta-4B chain OS=Homo sapiens OX=9606 GN=TUBB4B PE=1 SV=1	[R].IMNTFSVVPSPK.[V]	1xOxidation [M2]	259355	1.2199e+06	480195	222268	173658	203009		17.9846	20.2183	18.8733	17.7619	17.4059	17.6312		0.777864	1.46369	1.15294	0.865502	0.926716	0.638784		0.777864	1.46369	1.15294	0.865502	0.926716	0.638784		-0.321163	-0.397563	0.718845
TGME49_277080-t26_1-p1	transcript=TGME49_277080-t26_1 | gene=TGME49_277080 | organism=Toxoplasma_gondii_ME49 | gene_product=microneme protein MIC5 | transcript_product=microneme protein MIC5 | location=TGME49_chrXII:6723530-6725504(-) | protein_length=181 | sequence_SO=chromosome | SO=protein_coding | is_pseudo=false	[R].LMVTEKQESK.[N]	1xOxidation [M2]					63934.8							15.9643							-0.514858			-4.88561	-5.39624	-4.74165	-4.48959	-0.514858	-4.55524		1.82127	1.41552	1.02814
Q9NZN3	EH domain-containing protein 3 OS=Homo sapiens OX=9606 GN=EHD3 PE=1 SV=2 EH domain-containing protein 1 OS=Homo sapiens OX=9606 GN=EHD1 PE=1 SV=2	[K].LNAFGNAFLNR.[F]			70912							16.1137							-2.6409						-4.88459	-2.6409	-4.82451	-4.62033	-4.69371	-4.48845		-0.484163	-0.166982	0.115651
P04264	Keratin, type II cytoskeletal 1 OS=Homo sapiens OX=9606 GN=KRT1 PE=1 SV=6	[K].LNDLEDALQQAK.[E]		49441.3	5228690	1.13413e+06	50489.7	142806	211747		15.5934	22.318	20.1132	15.6237	17.1237	17.692		-1.61327	3.56337	2.39283	-1.27273	0.644524	0.699577		-1.61327	3.56337	2.39283	-1.27273	0.644524	0.699577		-1.42385	-0.0837483	0.431184
P04264	Keratin, type II cytoskeletal 1 OS=Homo sapiens OX=9606 GN=KRT1 PE=1 SV=6	[K].LNDLEDALQQAKEDLAR.[L]			798339	45260.1			22101.2			19.6066	15.466			14.4318			0.851997	-2.25437			-2.56057		-5.01299	0.851997	-2.25437	-4.43331	-4.85865	-2.56057		-1.81239	-0.0837483	0.431184
P35908	Keratin, type II cytoskeletal 2 epidermal OS=Homo sapiens OX=9606 GN=KRT2 PE=1 SV=2	[K].LNDLEEALQQAK.[E]			873455	42336			79828.4			19.7364	15.3696			16.2846			0.981728	-2.35072			-0.707787		-5.05231	0.981728	-2.35072	-4.4246	-4.71985	-0.707787		-1.14364	0.181252	0.903762
P35908	Keratin, type II cytoskeletal 2 epidermal OS=Homo sapiens OX=9606 GN=KRT2 PE=1 SV=2	[K].LNDLEEALQQAKEDLAR.[L]			42083.8							15.361							-3.39367						-4.81822	-3.39367	-4.85554	-4.58195	-4.78606	-4.42576		-0.242114	0.181252	0.903762
P15924	Desmoplakin OS=Homo sapiens OX=9606 GN=DSP PE=1 SV=3	[R].LNDSILQATEQR.[R]			371721			35043.5	79581.6			18.5039			15.0969	16.2801			-0.250785			-1.38231	-0.712255		-5.00078	-0.250785	-4.79468	-4.56935	-1.38231	-0.712255		1.12744	0.231076	0.904463
P26447	Protein S100-A4 OS=Homo sapiens OX=9606 GN=S100A4 PE=1 SV=1	[K].LMSNLDSNR.[D]	1xOxidation [M2]	279849	433937	237999	250315	146316	146757		18.0943	18.7271	17.8606	17.9334	17.1587	17.1631		0.887586	-0.027518	0.140277	1.03695	0.679555	0.170668		0.887586	-0.027518	0.140277	1.03695	0.679555	0.170668		0.295609	0.0142197	0.0231893
TGME49_310780-t26_1-p1	transcript=TGME49_310780-t26_1 | gene=TGME49_310780 | organism=Toxoplasma_gondii_ME49 | gene_product=dense granule protein GRA4 | transcript_product=dense granule protein GRA4 | location=TGME49_chrXI:1589170-1590207(-) | protein_length=345 | sequence_SO=chromosome | SO=protein_coding | is_pseudo=false	[R].LPAFSDSVSVSTEDSGLTVVR.[D]					1.49564e+06	379036	883342					20.5123	18.532	19.7526					3.6159	2.0528	2.76021		-4.81741	-5.1875	-4.72185	3.6159	2.0528	2.76021		7.71855	5.11494	9.55313
P09382	Galectin-1 OS=Homo sapiens OX=9606 GN=LGALS1 PE=1 SV=2	[K].LPDGYEFKFPNR.[L]			361662	62121.6	39164.8		28404.5			18.4643	15.9228	15.2573		14.7938			-0.290364	-1.79751	-1.63917		-2.19857		-4.88324	-0.290364	-1.79751	-1.63917	-4.70916	-2.19857		-0.52526	-0.932788	2.61615
P67936	Tropomyosin alpha-4 chain OS=Homo sapiens OX=9606 GN=TPM4 PE=1 SV=3 Tropomyosin alpha-1 chain OS=Homo sapiens OX=9606 GN=TPM1 PE=1 SV=2 Tropomyosin beta chain OS=Homo sapiens OX=9606 GN=TPM2 PE=1 SV=1 Tropomyosin alpha-3 chain OS=Homo sapiens OX=9606 GN=TPM3 PE=1 SV=2	[R].IQLVEEELDRAQER.[L]		608274	69262544	1.68552e+07	3.4412e+06	323702	7.32422e+06		19.2144	26.0456	24.0067	21.7145	18.3043	22.8042		2.00766	7.29093	6.28637	4.81804	1.82513	5.81184		2.00766	7.29093	6.28637	4.81804	1.82513	5.81184		-1.04331	-1.11715	10.5206
P35580	Myosin-10 OS=Homo sapiens OX=9606 GN=MYH10 PE=1 SV=3	[K].LQNELDNVSTLLEEAEK.[K]			206628	55802.6						17.6567	15.768						-1.09797	-1.95228					-5.01426	-1.09797	-1.95228	-4.59192	-4.68289	-4.49257		-1.90096	-1.95045	59.9637
P35580	Myosin-10 OS=Homo sapiens OX=9606 GN=MYH10 PE=1 SV=3	[K].LQNELDNVSTLLEEAEKK.[G]			1.86073e+06	455167			58824.9			20.8274	18.796			15.8441			2.07279	1.07572			-1.14826		-4.93378	2.07279	1.07572	-4.69756	-4.71732	-1.14826		-2.92596	-1.95045	59.9637
Q8NEZ2	Vacuolar protein sorting-associated protein 37A OS=Homo sapiens OX=9606 GN=VPS37A PE=1 SV=1	[K].LQQAIAMHSQFHAPL.[-]	1xOxidation [M7]				61568.7	13057.5	30758.3					15.9099	13.6726	14.9087					-0.986527	-2.80658	-2.08371		-5.05244	-5.3029	-4.93962	-0.986527	-2.80658	-2.08371		3.13938	3.73092	7.5573
Q9Y6C2	EMILIN-1 OS=Homo sapiens OX=9606 GN=EMILIN1 PE=1 SV=3	[R].LQQEATEHATESEER.[F]		125073	106467	46364					16.9324	16.7	15.5007					-0.274287	-2.0546	-2.2196					-0.274287	-2.0546	-2.2196	-4.57476	-4.65027	-4.63398		-3.1035	-1.37014	6.27959
P35579	Myosin-9 OS=Homo sapiens OX=9606 GN=MYH9 PE=1 SV=4	[R].LQQELDDLLVDLDHQR.[Q]			824451	263416			34376.5			19.6531	18.007			15.0691			0.898428	0.28666			-1.92327		-4.96008	0.898428	0.28666	-4.66869	-4.75082	-1.92327		-2.5226	-1.7311	75.0609
P35580	Myosin-10 OS=Homo sapiens OX=9606 GN=MYH10 PE=1 SV=3	[R].LQQELDDLTVDLDHQR.[Q]			3.76314e+06	1.24192e+06			206591			21.8435	20.2441			17.6564			3.08886	2.52382			0.664016		-4.86754	3.08886	2.52382	-4.5644	-4.76134	0.664016		-3.13562	-1.95045	59.9637
P67936	Tropomyosin alpha-4 chain OS=Homo sapiens OX=9606 GN=TPM4 PE=1 SV=3 Tropomyosin alpha-1 chain OS=Homo sapiens OX=9606 GN=TPM1 PE=1 SV=2 Tropomyosin beta chain OS=Homo sapiens OX=9606 GN=TPM2 PE=1 SV=1 Tropomyosin alpha-3 chain OS=Homo sapiens OX=9606 GN=TPM3 PE=1 SV=2	[R].IQLVEEELDR.[A]		92566.3	3.51195e+06	1.28448e+06	135141	98964.4	715223		16.4982	21.7438	20.2928	17.0441	16.5946	19.448		-0.708503	2.98919	2.57244	0.147668	0.115449	2.45563		-0.708503	2.98919	2.57244	0.147668	0.115449	2.45563		-0.71146	-1.11715	10.5206
P35579	Myosin-9 OS=Homo sapiens OX=9606 GN=MYH9 PE=1 SV=4	[K].LQRELEDATETADAMNR.[E]			114054							16.7994							-1.95529						-4.9087	-1.95529	-4.89143	-4.4532	-4.77197	-4.67678		-0.71551	-1.7311	75.0609
Q969G5	Caveolae-associated protein 3 OS=Homo sapiens OX=9606 GN=CAVIN3 PE=1 SV=3	[R].IQSGLGALSR.[S]		312029	576133	174236	59530	61192	81530.2		18.2513	19.136	17.4107	15.8613	15.9011	16.315		1.04462	0.381398	-0.30964	-1.03511	-0.578117	-0.677355		1.04462	0.381398	-0.30964	-1.03511	-0.578117	-0.677355		-1.13565	-1.17185	2.32598
P15924	Desmoplakin OS=Homo sapiens OX=9606 GN=DSP PE=1 SV=3	[R].LQSLTENLTK.[E]			158181				29110.7			17.2712				14.8293			-1.48343				-2.16314		-4.98761	-1.48343	-4.73927	-4.42386	-4.66993	-2.16314		-0.0155414	0.231076	0.904463
P13646	Keratin, type I cytoskeletal 13 OS=Homo sapiens OX=9606 GN=KRT13 PE=1 SV=4	[R].LQSSSASYGGGFGGGSCQLGGGR.[G]	1xCarbamidomethyl [C17]		166082	139993	53540.6		132742			17.3415	17.095	15.7083		17.0183			-1.41311	-0.625322	-1.18809		0.0258655		-4.96578	-1.41311	-0.625322	-1.18809	-4.76175	0.0258655		0.360077	0.64463	0.47275
P02545	Prelamin-A/C OS=Homo sapiens OX=9606 GN=LMNA PE=1 SV=1	[R].LQTMKEELDFQK.[N]	1xOxidation [M4]	35100.2	40379.1	15998.9		5338.35	9007.88		15.0992	15.3013	13.9657		12.3822	13.137		-2.10751	-3.45333	-3.75464		-4.09699	-3.85543		-2.10751	-3.45333	-3.75464	-4.54325	-4.09699	-3.85543		-1.06007	-0.90132	4.27226
P11498	Pyruvate carboxylase, mitochondrial OS=Homo sapiens OX=9606 GN=PC PE=1 SV=2	[R].LQVEHTVTEEITDVDLVHAQIHVAEGR.[S]		244292	122353	144582	137507	131789	80855.5		17.8982	16.9007	17.1415	17.0692	17.0079	16.3031		0.691546	-1.85395	-0.578789	0.172714	0.528702	-0.689343		0.691546	-1.85395	-0.578789	0.172714	0.528702	-0.689343		0.584422	0.0971525	0.0663744
P35579	Myosin-9 OS=Homo sapiens OX=9606 GN=MYH9 PE=1 SV=4	[K].LQVELDNVTGLLSQSDSK.[S]		44820	9.2248e+06	3.42112e+06	238353	31201.4	797410		15.4519	23.1371	21.706	17.8627	14.9293	19.605		-1.75485	4.38244	3.98572	0.966306	-1.54985	2.61256		-1.75485	4.38244	3.98572	0.966306	-1.54985	2.61256		-1.5281	-1.7311	75.0609
P17931	Galectin-3 OS=Homo sapiens OX=9606 GN=LGALS3 PE=1 SV=5	[K].IQVLVEPDHFK.[V]			134877	41247.3			15418.8			17.0413	15.332			13.9124			-1.71336	-2.38831			-3.08		-4.82947	-1.71336	-2.38831	-4.54327	-4.88802	-3.08		-1.19338	-1.06662	1.17836
P35579	Myosin-9 OS=Homo sapiens OX=9606 GN=MYH9 PE=1 SV=4	[K].LQRELEDATETADAMNR.[E]	1xOxidation [M15]		118669	73110.9			12814			16.8566	16.1578			13.6454			-1.89806	-1.56252			-3.34697		-5.03443	-1.89806	-1.56252	-4.62468	-4.8668	-3.34697		-1.44781	-1.7311	75.0609
Q14956	Transmembrane glycoprotein NMB OS=Homo sapiens OX=9606 GN=GPNMB PE=1 SV=2	[R].IPDENCQINR.[Y]	1xCarbamidomethyl [C6]	148728	403976	200753	91098.5	72800.7	135033		17.1823	18.6239	17.6151	16.4751	16.1517	17.043		-0.0243822	-0.130736	-0.10526	-0.421297	-0.327508	0.0505504		-0.0243822	-0.130736	-0.10526	-0.421297	-0.327508	0.0505504		-0.145959	-0.394247	0.398377
P35579	Myosin-9 OS=Homo sapiens OX=9606 GN=MYH9 PE=1 SV=4	[K].LQKDLEGLSQRHEEK.[V]			78967.7	33866.4						16.269	15.0476						-2.48567	-2.67275					-4.81827	-2.48567	-2.67275	-4.57084	-4.82887	-4.42863		-1.28388	-1.7311	75.0609
Q07065	Cytoskeleton-associated protein 4 OS=Homo sapiens OX=9606 GN=CKAP4 PE=1 SV=2	[R].LQHVEDGVLSMQVASAR.[Q]			64139.2							15.9689							-2.78573						-4.90366	-2.78573	-4.89398	-4.67329	-4.81308	-4.40007		-0.43436	0.114884	0.322937
O43281	Embryonal Fyn-associated substrate OS=Homo sapiens OX=9606 GN=EFS PE=1 SV=1	[R].LPGYGGPKVEGDPEGR.[E]			38513	26379.3						15.2331	14.6871						-3.52159	-3.0332					-4.92591	-3.52159	-3.0332	-4.42001	-4.62658	-4.42985		-0.665248	-1.12462	2.78147
Q09666	Neuroblast differentiation-associated protein AHNAK OS=Homo sapiens OX=9606 GN=AHNAK PE=1 SV=2	[K].LPTGQISGPEIK.[G]							88696.5							16.4366							-0.555813		-5.03521	-5.31891	-4.85592	-4.4376	-4.65273	-0.555813		1.85463	0.593635	3.00819
TGME49_254720-t26_1-p1	transcript=TGME49_254720-t26_1 | gene=TGME49_254720 | organism=Toxoplasma_gondii_ME49 | gene_product=dense granule protein GRA8 | transcript_product=dense granule protein GRA8 | location=TGME49_chrIII:1904580-1905389(+) | protein_length=269 | sequence_SO=chromosome | SO=protein_coding | is_pseudo=false	[K].IPYGGAAPPR.[A]					1.22079e+06	507159	636845					20.2194	18.9521	19.2806					3.32295	2.47291	2.28818		-4.99403	-5.28446	-4.94294	3.32295	2.47291	2.28818		7.76849	5.58595	15.2749
Q00839	Heterogeneous nuclear ribonucleoprotein U OS=Homo sapiens OX=9606 GN=HNRNPU PE=1 SV=6	[R].LQAALDDEEAGGRPAMEPGNGSLDLGGDSAGR.[S]	1xOxidation [M16]																						-5.0606	-5.14094	-4.94621	-4.62002	-4.75383	-4.54024		0.411222	-0.337796	0.479685
P67936	Tropomyosin alpha-4 chain OS=Homo sapiens OX=9606 GN=TPM4 PE=1 SV=3	[K].IQALQQQADEAEDR.[A]		205776	3548060	1.10581e+06	134394	197347	560035		17.6507	21.7586	20.0767	17.0361	17.5904	19.0952		0.444013	3.00395	2.35636	0.139678	1.1112	2.10276		0.444013	3.00395	2.35636	0.139678	1.1112	2.10276		-0.816895	-1.11715	10.5206
Q07065	Cytoskeleton-associated protein 4 OS=Homo sapiens OX=9606 GN=CKAP4 PE=1 SV=2	[R].LQHVEDGVLSMQVASAR.[Q]	1xOxidation [M11]		172760							17.3984							-1.35624						-5.04436	-1.35624	-4.85599	-4.41827	-4.76359	-4.4847		-0.803326	0.114884	0.322937
P67936	Tropomyosin alpha-4 chain OS=Homo sapiens OX=9606 GN=TPM4 PE=1 SV=3	[K].IQALQQQADEAEDRAQGLQR.[E]		125462	7.30057e+06	1.98162e+06	453828	69540.9	788135		16.9369	22.7996	20.9182	18.7918	16.0856	19.5881		-0.269816	4.04493	3.19793	1.89535	-0.393599	2.59568		-0.269816	4.04493	3.19793	1.89535	-0.393599	2.59568		-0.958538	-1.11715	10.5206
P08670	Vimentin OS=Homo sapiens OX=9606 GN=VIM PE=1 SV=4	[R].LQDEIQNMKEEMAR.[H]	1xOxidation [M]	75129.7	1.86191e+06	844287	134652		220864		16.1971	20.8284	19.6874	17.0389		17.7528		-1.00961	2.07371	1.96705	0.142445		0.760399		-1.00961	2.07371	1.96705	0.142445	-4.74572	0.760399		-2.29134	-1.45396	18.1104
P08670	Vimentin OS=Homo sapiens OX=9606 GN=VIM PE=1 SV=4	[R].LQDEIQNMKEEMAR.[H]	2xOxidation [M8	768635	1.45346e+06	380839	124238	408161	209338		19.5519	20.4711	18.5388	16.9227	18.6388	17.6755		2.34524	1.71642	0.818501	0.0263106	2.15961	0.683075		2.34524	1.71642	0.818501	0.0263106	2.15961	0.683075		-0.670387	-1.45396	18.1104
P62979	Ubiquitin-40S ribosomal protein S27a OS=Homo sapiens OX=9606 GN=RPS27A PE=1 SV=2	[K].IQDKEGIPPDQQR.[L]		148195	194516	68440.1	57003.5	46820	86522.7		17.1771	17.5695	16.0626	15.7988	15.5148	16.4008		-0.0295695	-1.18512	-1.65777	-1.09767	-0.964334	-0.591611		-0.0295695	-1.18512	-1.65777	-1.09767	-0.964334	-0.591611		0.0729444	-0.073528	0.140305
Q9Y6C2	EMILIN-1 OS=Homo sapiens OX=9606 GN=EMILIN1 PE=1 SV=3	[R].LQDRVDAQDETAAEFTLR.[L]				58249.7			13395.4				15.83			13.7094				-1.89036			-3.28295		-5.00682	-5.29012	-1.89036	-4.65766	-4.88578	-3.28295		-0.213032	-1.37014	6.27959
P02545	Prelamin-A/C OS=Homo sapiens OX=9606 GN=LMNA PE=1 SV=1	[R].LQEKEDLQELNDR.[L]		81074.8	109840	39763.7	9835.87	14981.1	44296.3		16.307	16.745	15.2792	13.2638	13.8709	15.4349		-0.899737	-2.00961	-2.44116	-3.6326	-2.60832	-1.5575		-0.899737	-2.00961	-2.44116	-3.6326	-2.60832	-1.5575		-0.815973	-0.90132	4.27226
TGME49_291630-t26_1-p1	transcript=TGME49_291630-t26_1 | gene=TGME49_291630 | organism=Toxoplasma_gondii_ME49 | gene_product=hypothetical protein | transcript_product=hypothetical protein | location=TGME49_chrIX:4305019-4305726(-) | protein_length=235 | sequence_SO=chromosome | SO=protein_coding | is_pseudo=false	[R].IQELYQESFR.[L]		68745.9	51232.4		104935	24136.8	70597.3		16.069	15.6448		16.6791	14.5589	16.1073		-1.13772	-3.10988		-0.217295	-1.92023	-0.885076		-1.13772	-3.10988	-4.77626	-0.217295	-1.92023	-0.885076		2.00042	0.917982	1.00297
P35908	Keratin, type II cytoskeletal 2 epidermal OS=Homo sapiens OX=9606 GN=KRT2 PE=1 SV=2	[R].LQGEIAHVK.[K]		84812.6	1.98388e+06	70399.8	48671.1	122562	223729		16.372	20.9199	16.1033	15.5708	16.9032	17.7714		-0.834712	2.16525	-1.61704	-1.32566	0.423985	0.778994		-0.834712	2.16525	-1.61704	-1.32566	0.423985	0.778994		0.0546074	0.181252	0.903762
P08670	Vimentin OS=Homo sapiens OX=9606 GN=VIM PE=1 SV=4	[R].LQDEIQNMKEEMAR.[H]			434800	205562						18.73	17.6492						-0.0246544	-0.0711065					-4.82498	-0.0246544	-0.0711065	-4.49219	-4.76365	-4.51388		-2.94966	-1.45396	18.1104
TGME49_315780-t26_1-p1	transcript=TGME49_315780-t26_1 | gene=TGME49_315780 | organism=Toxoplasma_gondii_ME49 | gene_product=myosin regulatory light chain, putative | transcript_product=myosin regulatory light chain, putative | location=TGME49_chrXI:4980235-4982989(+) | protein_length=206 | sequence_SO=chromosome | SO=protein_coding | is_pseudo=false	[K].LLTGPAGVATVNATR.[-]		27388.5	52358.6				11686.8		14.7413	15.6761				13.5126		-2.46542	-3.07851				-3.47981		-2.46542	-3.07851	-4.69572	-4.59462	-4.64199	-3.47981		-0.825591	-0.825591	1.48989
P06753	Tropomyosin alpha-3 chain OS=Homo sapiens OX=9606 GN=TPM3 PE=1 SV=2	[K].ILTDKLKEAETR.[A]		65174.5	1735557	303320	89460.5	46669	118453		15.992	20.727	18.2105	16.449	15.5102	16.854		-1.21468	1.97232	0.490162	-0.447473	-0.968996	-0.138443		-1.21468	1.97232	0.490162	-0.447473	-0.968996	-0.138443		-0.934238	-1.26178	3.52114
P02533	Keratin, type I cytoskeletal 14 OS=Homo sapiens OX=9606 GN=KRT14 PE=1 SV=4	[K].ILTATVDNANVLLQIDNAR.[L]			1.17163e+06	177914	16675.9		85098.2			20.1601	17.4408	14.0255		16.3768			1.40544	-0.279499	-2.87096		-0.615562		-5.0362	1.40544	-0.279499	-2.87096	-4.77715	-0.615562		-1.45114	0.0182555	0.0639849
Q09666	Neuroblast differentiation-associated protein AHNAK OS=Homo sapiens OX=9606 GN=AHNAK PE=1 SV=2	[R].LKSEDGVEGDLGETQSR.[T]			47984.5				35042.6			15.5503				15.0968			-3.20436				-1.89558		-4.86776	-3.20436	-4.81972	-4.65633	-4.84371	-1.89558		0.49874	0.593635	3.00819
P35579	Myosin-9 OS=Homo sapiens OX=9606 GN=MYH9 PE=1 SV=4	[K].LKSMEAEMIQLQEELAAAER.[A]	2xOxidation [M4		512452	148410						18.9671	17.1792						0.212412	-0.541094					-4.91874	0.212412	-0.541094	-4.67182	-4.756	-4.6405		-2.9403	-1.7311	75.0609
P13646	Keratin, type I cytoskeletal 13 OS=Homo sapiens OX=9606 GN=KRT13 PE=1 SV=4	[R].LKYENELALR.[Q]						10600.7							13.3719							-3.10731			-5.07413	-5.23386	-4.67298	-4.62534	-3.10731	-4.46078		0.929183	0.64463	0.47275
P13645	Keratin, type I cytoskeletal 10 OS=Homo sapiens OX=9606 GN=KRT10 PE=1 SV=6	[R].LKYENEVALR.[Q]		1.29524e+06	2.72724e+07	2.11374e+06	1.72196e+06	1.55197e+06	3.9906e+06		20.3048	24.7009	21.0114	20.7156	20.5657	21.9282		3.09808	5.94629	3.29105	3.81918	4.0865	4.93577		3.09808	5.94629	3.29105	3.81918	4.0865	4.93577		0.168677	-0.141331	0.518507
P08779	Keratin, type I cytoskeletal 16 OS=Homo sapiens OX=9606 GN=KRT16 PE=1 SV=4	[K].IIAATIENAQPILQIDNAR.[L]			2.15444e+06	137783			191203			21.0389	17.072			17.5447			2.28424	-0.648278			0.552343		-4.97712	2.28424	-0.648278	-4.41858	-4.81936	0.552343		-1.78148	0.289347	0.93167
P35579	Myosin-9 OS=Homo sapiens OX=9606 GN=MYH9 PE=1 SV=4	[K].LKQVEDEKNSFR.[E]		16838.3	630892	267275			24514.7		14.0395	19.267	18.028			14.5814		-3.16724	0.512387	0.307647			-2.41104		-3.16724	0.512387	0.307647	-4.55885	-4.82774	-2.41104		-3.15014	-1.7311	75.0609
Q8WUM4	Programmed cell death 6-interacting protein OS=Homo sapiens OX=9606 GN=PDCD6IP PE=1 SV=1	[R].LLDEEEATDNDLR.[A]					36991.1	27719.5	43390.3					15.1749	14.7586	15.4051					-1.72154	-1.72056	-1.58732		-5.08443	-5.15288	-4.8989	-1.72154	-1.72056	-1.58732		3.36893	3.00135	4.21966
P60866	40S ribosomal protein S20 OS=Homo sapiens OX=9606 GN=RPS20 PE=1 SV=1	[R].LIDLHSPSEIVK.[Q]		519065	1.94186e+06	1.16217e+06	347560	332951	409422		18.9856	20.889	20.1484	18.4069	18.345	18.6432		1.77885	2.13436	2.42807	1.51047	1.86578	1.65083		1.77885	2.13436	2.42807	1.51047	1.86578	1.65083		-0.43807	-0.779869	0.839956
Q8IY81	pre-rRNA 2'-O-ribose RNA methyltransferase FTSJ3 OS=Homo sapiens OX=9606 GN=FTSJ3 PE=1 SV=2	[R].ILDPEGLALGAVIASSK.[K]			128127	25296.9						16.9672	14.6267						-1.78744	-3.09365					-5.03445	-1.78744	-3.09365	-4.52352	-4.885	-4.52593		-1.33964	-1.11121	2.1847
P18583	Protein SON OS=Homo sapiens OX=9606 GN=SON PE=1 SV=4	[K].ILDSFAAAPVPTTTLVLK.[S]		15729	1.17893e+06	506601	304071		414651		13.9411	20.169	18.9505	18.2141		18.6615		-3.26556	1.4144	1.23017	1.31761		1.66914		-3.26556	1.4144	1.23017	1.31761	-4.64728	1.66914		-0.346514	0.230246	0.639001
P05387	60S acidic ribosomal protein P2 OS=Homo sapiens OX=9606 GN=RPLP2 PE=1 SV=1	[K].ILDSVGIEADDDR.[L]			120574	65437.6			34060.5			16.8796	15.9978			15.0558			-1.87509	-1.72249			-1.93659		-5.01195	-1.87509	-1.72249	-4.67066	-4.71023	-1.93659		-0.90265	-0.520351	0.985711
P05387	60S acidic ribosomal protein P2 OS=Homo sapiens OX=9606 GN=RPLP2 PE=1 SV=1	[K].ILDSVGIEADDDRLNK.[V]		46042.3	941560	519156	132548	25436.6	181043		15.4907	19.8447	18.9858	17.0162	14.6346	17.466		-1.71603	1.09005	1.26549	0.119718	-1.84455	0.473573		-1.71603	1.09005	1.26549	0.119718	-1.84455	0.473573		-0.630256	-0.520351	0.985711
Q9H4M9	EH domain-containing protein 1 OS=Homo sapiens OX=9606 GN=EHD1 PE=1 SV=2	[K].LLDTVDDMLANDIAR.[L]	1xOxidation [M8]		158712	59569						17.2761	15.8623						-1.47859	-1.85805					-4.87536	-1.47859	-1.85805	-4.42362	-4.72558	-4.40118		-1.77946	-1.0843	1.83681
P62241	40S ribosomal protein S8 OS=Homo sapiens OX=9606 GN=RPS8 PE=1 SV=2	[R].IIDVVYNASNNELVR.[T]		120408	2.32045e+06	540966		35882.6	318604		16.8776	21.146	19.0452		15.131	18.2814		-0.329134	2.39133	1.32486		-1.34817	1.289		-0.329134	2.39133	1.32486	-4.41242	-1.34817	1.289		-2.61955	-1.26318	2.87779
P08708	40S ribosomal protein S17 OS=Homo sapiens OX=9606 GN=RPS17 PE=1 SV=2	[K].LLDFGSLSNLQVTQPTVGMNFK.[T]	1xOxidation [M19]		2.22735e+06	822810	118050		86334.3			21.0869	19.6502	16.849		16.3976			2.33225	1.92988	-0.0473923		-0.594757		-4.79615	2.33225	1.92988	-0.0473923	-4.72821	-0.594757		-1.61211	-1.23491	4.32648
P15924	Desmoplakin OS=Homo sapiens OX=9606 GN=DSP PE=1 SV=3	[R].LLEAQIATGGIIDPK.[E]			710883	57500.8	52737.8	23283.4	241913			19.4393	15.8113	15.6866	14.507	17.8841			0.684608	-1.90903	-1.20989	-1.97216	0.891729		-4.92643	0.684608	-1.90903	-1.20989	-1.97216	0.891729		1.28685	0.231076	0.904463
Q14847	LIM and SH3 domain protein 1 OS=Homo sapiens OX=9606 GN=LASP1 PE=1 SV=2	[R].LKQQSELQSQVR.[Y]			58192.6							15.8285							-2.9261						-4.92848	-2.9261	-4.80761	-4.62269	-4.7277	-4.6497		-0.445968	-0.454597	0.328293
TGME49_254470-t26_1-p1	transcript=TGME49_254470-t26_1 | gene=TGME49_254470 | organism=Toxoplasma_gondii_ME49 | gene_product=hypothetical protein | transcript_product=hypothetical protein | location=TGME49_chrIII:1759224-1763403(+) | protein_length=732 | sequence_SO=chromosome | SO=protein_coding | is_pseudo=false	[R].LKNSELVGDMVYSDPR.[S]	1xOxidation [M10]				447714	95588.1	144819					18.7722	16.5445	17.1439					1.87578	0.0653708	0.151488		-4.8404	-5.25934	-4.95991	1.87578	0.0653708	0.151488		5.71743	4.61419	17.6154
TGME49_225160-t26_1-p1	transcript=TGME49_225160-t26_1 | gene=TGME49_225160 | organism=Toxoplasma_gondii_ME49 | gene_product=hypothetical protein | transcript_product=hypothetical protein | location=TGME49_chrX:2445343-2446548(+) | protein_length=401 | sequence_SO=chromosome | SO=protein_coding | is_pseudo=false	[R].LGTSQELQPEYVAVAER.[K]					104138		49173.6					16.6681		15.5856					-0.228298		-1.40681		-4.84396	-5.37185	-4.80305	-0.228298	-4.8759	-1.40681		2.83595	2.89801	4.09827
P19474	E3 ubiquitin-protein ligase TRIM21 OS=Homo sapiens OX=9606 GN=TRIM21 PE=1 SV=1	[R].IHAEFVQQK.[N]		542494	1.61865e+06	948990	178299	265163	299295		19.0492	20.6264	19.856	17.4439	18.0165	18.1912		1.84254	1.87172	2.13571	0.547503	1.53735	1.19881		1.84254	1.87172	2.13571	0.547503	1.53735	1.19881		-0.855439	-1.30475	4.32229
Q13885	Tubulin beta-2A chain OS=Homo sapiens OX=9606 GN=TUBB2A PE=1 SV=1 Tubulin beta-6 chain OS=Homo sapiens OX=9606 GN=TUBB6 PE=1 SV=1 Tubulin beta chain OS=Homo sapiens OX=9606 GN=TUBB PE=1 SV=2 Tubulin beta-4B chain OS=Homo sapiens OX=9606 GN=TUBB4B PE=1 SV=1 Tubulin beta-2B chain OS=Homo sapiens OX=9606 GN=TUBB2B PE=1 SV=1	[R].LHFFMPGFAPLTSR.[G]	1xOxidation [M5]		373841	58792.2			43484.2			18.5121	15.8433			15.4082			-0.24258	-1.87698			-1.5842		-5.00503	-0.24258	-1.87698	-4.47324	-4.87939	-1.5842		-1.27074	-0.352122	1.0173
P02545	Prelamin-A/C OS=Homo sapiens OX=9606 GN=LMNA PE=1 SV=1	[R].LKDLEALLNSK.[E]		8477368	1.09657e+07	9.7165e+06	8.27204e+06	6678615	8.11403e+06		23.0152	23.3865	23.212	22.9798	22.6711	22.952		5.80848	4.63185	5.49168	6.08337	6.19194	5.95958		5.80848	4.63185	5.49168	6.08337	6.19194	5.95958		0.767628	-0.90132	4.27226
P35579	Myosin-9 OS=Homo sapiens OX=9606 GN=MYH9 PE=1 SV=4	[K].LKDVLLQVDDER.[R]		13790.2	1.35406e+06	589115	29664.1	17157.8	170768		13.7514	20.3689	19.1682	14.8564	14.0666	17.3817		-3.45534	1.61421	1.44787	-2.04001	-2.41259	0.389276		-3.45534	1.61421	1.44787	-2.04001	-2.41259	0.389276		-1.22335	-1.7311	75.0609
P35579	Myosin-9 OS=Homo sapiens OX=9606 GN=MYH9 PE=1 SV=4	[K].LKDVLLQVDDERR.[N]		74328.2	3.25528e+06	1.28521e+06	115890	24989.6	297123		16.1816	21.6343	20.2936	16.8224	14.609	18.1807		-1.02508	2.8797	2.57326	-0.0740455	-1.87013	1.1883		-1.02508	2.8797	2.57326	-0.0740455	-1.87013	1.1883		-1.72792	-1.7311	75.0609
O00488	Zinc finger protein 593 OS=Homo sapiens OX=9606 GN=ZNF593 PE=1 SV=2	[R].LKQLSVEPYSQEEAER.[A]			65721.5	37409.1	30869					16.0041	15.1911	14.9139					-2.75057	-2.52922	-1.98257				-4.9176	-2.75057	-2.52922	-1.98257	-4.67051	-4.63404		-0.363244	-0.6042	1.05772
P35580	Myosin-10 OS=Homo sapiens OX=9606 GN=MYH10 PE=1 SV=3	[K].LKEIFMQVEDER.[R]	1xOxidation [M6]		203788	124584	47200.2		28232.2			17.6367	16.9268	15.5265		14.7851			-1.11793	-0.793567	-1.36993		-2.20735		-4.96755	-1.11793	-0.793567	-1.36993	-4.84247	-2.20735		-0.513568	-1.95045	59.9637
P35527	Keratin, type I cytoskeletal 9 OS=Homo sapiens OX=9606 GN=KRT9 PE=1 SV=3	[R].IKFEMEQNLR.[Q]	1xOxidation [M5]	2.33727e+06	3.03503e+07	2.52047e+06	2.65783e+06	3.50706e+06	6.08632e+06		21.1564	24.8552	21.2653	21.3418	21.7418	22.5371		3.94969	6.10056	3.54494	4.44538	5.26266	5.54474		3.94969	6.10056	3.54494	4.44538	5.26266	5.54474		0.552528	-0.363396	2.17627
Q09666	Neuroblast differentiation-associated protein AHNAK OS=Homo sapiens OX=9606 GN=AHNAK PE=1 SV=2	[K].IKGDVPSVGLEGPDVDLQGPEAK.[I]							127858							16.9642							-0.028219		-4.96387	-5.22524	-4.89394	-4.43489	-4.83273	-0.028219		1.92907	0.593635	3.00819
P09429	High mobility group protein B1 OS=Homo sapiens OX=9606 GN=HMGB1 PE=1 SV=3	[K].IKGEHPGLSIGDVAK.[K]		11548.6	16939.2	11242			60848.3		13.4954	14.0481	13.4566			15.8929		-3.71127	-4.70657	-4.26371			-1.09947		-3.71127	-4.70657	-4.26371	-4.50508	-4.75007	-1.09947		0.77564	0.77564	0.781458
P07951	Tropomyosin beta chain OS=Homo sapiens OX=9606 GN=TPM2 PE=1 SV=1	[K].LKGTEDEVEKYSESVK.[E]			421312	143932			63477.3			18.6845	17.135			15.954			-0.0701167	-0.585291			-1.03845		-5.06339	-0.0701167	-0.585291	-4.57633	-4.72469	-1.03845		-1.54022	-0.804096	2.00372
P35579	Myosin-9 OS=Homo sapiens OX=9606 GN=MYH9 PE=1 SV=4	[K].LKKLEEEQIILEDQNCK.[L]	1xCarbamidomethyl [C16]		143080							17.1265							-1.62818						-4.8708	-1.62818	-4.74532	-4.41074	-4.73605	-4.44634		-0.782938	-1.7311	75.0609
P35579	Myosin-9 OS=Homo sapiens OX=9606 GN=MYH9 PE=1 SV=4	[K].LKNKHEAMITDLEER.[L]			804673	262450			77245			19.618	18.0017			16.2372			0.863398	0.281365			-0.755248		-4.92147	0.863398	0.281365	-4.60874	-4.75883	-0.755248		-2.11537	-1.7311	75.0609
P35579	Myosin-9 OS=Homo sapiens OX=9606 GN=MYH9 PE=1 SV=4	[K].LKNKHEAMITDLEER.[L]	1xOxidation [M8]	175258	3.39464e+06	1.13114e+06	123108	168929	247222		17.4191	21.6948	20.1093	16.9096	17.3661	17.9154		0.212419	2.94018	2.38903	0.0131347	0.886887	0.923045		0.212419	2.94018	2.38903	0.0131347	0.886887	0.923045		-1.23952	-1.7311	75.0609
P35527	Keratin, type I cytoskeletal 9 OS=Homo sapiens OX=9606 GN=KRT9 PE=1 SV=3	[R].IKFEMEQNLR.[Q]			13276970	768503	67049.7		1.70092e+06			23.6624	19.5517	16.0329		20.6979			4.90778	1.83137	-0.863493		3.70548		-5.00504	4.90778	1.83137	-0.863493	-4.68052	3.70548		-1.19088	-0.363396	2.17627
P08779	Keratin, type I cytoskeletal 16 OS=Homo sapiens OX=9606 GN=KRT16 PE=1 SV=4	[R].LLEGEDAHLSSQQASGQSYSSR.[E]			461902	66721.3	44399.9	130892	78647.8			18.8172	16.0259	15.4383	16.998	16.2631			0.0625815	-1.69446	-1.45817	0.518846	-0.729283		-5.01144	0.0625815	-1.69446	-1.45817	0.518846	-0.729283		1.65824	0.289347	0.93167
P02533	Keratin, type I cytoskeletal 14 OS=Homo sapiens OX=9606 GN=KRT14 PE=1 SV=4	[R].LLEGEDAHLSSSQFSSGSQSSR.[D]		51494	1.73835e+06	332953	141149	142709	265666		15.6521	20.7293	18.345	17.1069	17.1227	18.0193		-1.55459	1.97464	0.624639	0.210421	0.643539	1.02685		-1.55459	1.97464	0.624639	0.210421	0.643539	1.02685		0.278706	0.0182555	0.0639849
Q04695	Keratin, type I cytoskeletal 17 OS=Homo sapiens OX=9606 GN=KRT17 PE=1 SV=2	[R].LLEGEDAHLTQYK.[K]			127252							16.9573							-1.79732						-5.06536	-1.79732	-4.89981	-4.5016	-4.78011	-4.62658		-0.715265	-0.144984	0.288677
TGME49_311720-t26_1-p1	transcript=TGME49_311720-t26_1 | gene=TGME49_311720 | organism=Toxoplasma_gondii_ME49 | gene_product=chaperonin protein BiP | transcript_product=chaperonin protein BiP | location=TGME49_chrXI:2225360-2228735(-) | protein_length=668 | sequence_SO=chromosome | SO=protein_coding | is_pseudo=false Heat shock cognate 71 kDa protein OS=Homo sapiens OX=9606 GN=HSPA8 PE=1 SV=1	[R].IINEPTAAAIAYGLDKK.[NV]			213794	98017.1	37922		65525.1			17.7059	16.5807	15.2107		15.9998			-1.04878	-1.13958	-1.68569		-0.992642		-4.79895	-1.04878	-1.13958	-1.68569	-4.72803	-0.992642		-0.139686	1.37289	1.53352
P22735	Protein-glutamine gamma-glutamyltransferase K OS=Homo sapiens OX=9606 GN=TGM1 PE=1 SV=4	[K].ILNVGDIGGNETVTLR.[Q]			132015				71356.9			17.0103				16.1228			-1.7443				-0.869636		-4.85863	-1.7443	-4.82833	-4.6384	-4.6932	-0.869636		0.410008	0.410008	0.295721
P61247	40S ribosomal protein S3a OS=Homo sapiens OX=9606 GN=RPS3A PE=1 SV=2	[K].LIPDSIGKDIEK.[A]		612728	3.06657e+06	1.26934e+06	263439	320979	472759		19.2249	21.5482	20.2756	18.0071	18.2921	18.8507		2.01818	2.79355	2.55533	1.11067	1.81295	1.85834		2.01818	2.79355	2.55533	1.11067	1.81295	1.85834		-0.861698	-0.976845	5.34325
Q9NYL9	Tropomodulin-3 OS=Homo sapiens OX=9606 GN=TMOD3 PE=1 SV=1	[K].ILPVFDEPPNPTNVEESLK.[R]			507601	121957						18.9533	16.896						0.198691	-0.824311					-4.94923	0.198691	-0.824311	-4.61152	-4.65211	-4.47577		-2.72152	-1.8006	9.86752
Q9NYL9	Tropomodulin-3 OS=Homo sapiens OX=9606 GN=TMOD3 PE=1 SV=1	[K].ILPVFDEPPNPTNVEESLKR.[T]			2.93895e+06	617781	35328.6		78157.6			21.4869	19.2367	15.1085		16.2541			2.73222	1.51641	-1.78789		-0.738303		-5.02906	2.73222	1.51641	-1.78789	-4.79729	-0.738303		-2.18102	-1.8006	9.86752
Q96FQ6	Protein S100-A16 OS=Homo sapiens OX=9606 GN=S100A16 PE=1 SV=1	[K].LIQNLDANHDGR.[I]		305684	982785	586006	250255	207998	220480		18.2217	19.9065	19.1606	17.933	17.6662	17.7503		1.01498	1.15187	1.44024	1.0366	1.18704	0.757885		1.01498	1.15187	1.44024	1.0366	1.18704	0.757885		-0.208519	-0.136639	0.2548
P08779	Keratin, type I cytoskeletal 16 OS=Homo sapiens OX=9606 GN=KRT16 PE=1 SV=4	[R].ILNEMRDQYEQMAEK.[N]	2xOxidation [M5		197034			103545	53414.6			17.5881			16.6599	15.7049			-1.16656			0.180722	-1.28745		-4.99331	-1.16656	-4.82772	-4.53699	0.180722	-1.28745		1.78129	0.289347	0.93167
O00159	Unconventional myosin-Ic OS=Homo sapiens OX=9606 GN=MYO1C PE=1 SV=4	[R].LLQSNPVLEAFGNAK.[T]			607606	288175			52004.2			19.2128	18.1366			15.6663			0.458131	0.416267			-1.32606		-4.99982	0.458131	0.416267	-4.54333	-4.66559	-1.32606		-2.13652	-1.70343	8.7537
P04264	Keratin, type II cytoskeletal 1 OS=Homo sapiens OX=9606 GN=KRT1 PE=1 SV=6	[R].LLRDYQELMNTK.[L]	1xOxidation [M9]	157493	3.83379e+06	397847	386026	389072	449623		17.2649	21.8703	18.6019	18.5583	18.5697	18.7784		0.0582299	3.1157	0.881534	1.6619	2.09051	1.78595		0.0582299	3.1157	0.881534	1.6619	2.09051	1.78595		0.494301	-0.0837483	0.431184
Q5XKE5	Keratin, type II cytoskeletal 79 OS=Homo sapiens OX=9606 GN=KRT79 PE=1 SV=2 Keratin, type II cytoskeletal 2 epidermal OS=Homo sapiens OX=9606 GN=KRT2 PE=1 SV=2 Keratin, type II cytoskeletal 2 oral OS=Homo sapiens OX=9606 GN=KRT76 PE=1 SV=2 Keratin, type II cytoskeletal 3 OS=Homo sapiens OX=9606 GN=KRT3 PE=1 SV=3	[R].LLRDYQELMNVK.[L]	1xOxidation [M9]	17688.9	751752		76785.5	10477.9	100540		14.1106	19.5199		16.2285	13.3551	16.6174		-3.09615	0.765252		-0.667889	-3.12411	-0.374999		-3.09615	0.765252	-4.84491	-0.667889	-3.12411	-0.374999		1.00293	-0.384744	0.814255
Q02413	Desmoglein-1 OS=Homo sapiens OX=9606 GN=DSG1 PE=1 SV=2	[K].IIRQEPSDSPMFIINR.[N]	1xOxidation [M11]	28295.3	575969	194058	153730	43455	533540		14.7883	19.1356	17.5661	17.23	15.4072	19.0252		-2.41843	0.380987	-0.154193	0.333606	-1.07194	2.03284		-2.41843	0.380987	-0.154193	0.333606	-1.07194	2.03284		1.16204	0.349231	0.963474
P67936	Tropomyosin alpha-4 chain OS=Homo sapiens OX=9606 GN=TPM4 PE=1 SV=3	[K].LLSDKLKEAETR.[A]		275930	4.41197e+06	1.19186e+06	323006	212515	583239		18.0739	22.073	20.1848	18.3012	17.6972	19.1537		0.867242	3.31835	2.46446	1.40477	1.21803	2.16132		0.867242	3.31835	2.46446	1.40477	1.21803	2.16132		-0.621974	-1.11715	10.5206
Q9Y6C2	EMILIN-1 OS=Homo sapiens OX=9606 GN=EMILIN1 PE=1 SV=3	[R].IISEINRLQQEATEHATESEER.[F]			53639.1							15.711							-3.04365						-5.07525	-3.04365	-4.80016	-4.49587	-4.68126	-4.52815		-0.262076	-1.37014	6.27959
P14625	Endoplasmin OS=Homo sapiens OX=9606 GN=HSP90B1 PE=1 SV=1	[R].LISLTDENALSGNEELTVK.[I]			73651	35460.4			19467.8			16.1684	15.1139			14.2488			-2.58623	-2.6064			-2.7436		-5.03435	-2.58623	-2.6064	-4.5643	-4.71354	-2.7436		-0.598152	-0.13101	0.243541
Q04695	Keratin, type I cytoskeletal 17 OS=Homo sapiens OX=9606 GN=KRT17 PE=1 SV=2	[K].ILTATVDNANILLQIDNAR.[L]			137275							17.0667							-1.68793						-4.79418	-1.68793	-4.78064	-4.43929	-4.74957	-4.44104		-0.789051	-0.144984	0.288677
P04264	Keratin, type II cytoskeletal 1 OS=Homo sapiens OX=9606 GN=KRT1 PE=1 SV=6	[R].LLRDYQELMNTK.[L]			353324				28937.7			18.4306				14.8207			-0.324014				-2.17174		-5.00457	-0.324014	-4.70842	-4.61761	-4.89982	-2.17174		-0.55072	-0.0837483	0.431184
P08779	Keratin, type I cytoskeletal 16 OS=Homo sapiens OX=9606 GN=KRT16 PE=1 SV=4	[R].ILNEMRDQYEQMAEK.[N]	1xOxidation [M12]		110412				20240.4			16.7525				14.3049			-2.0021				-2.68745		-4.81982	-2.0021	-4.71166	-4.4487	-4.85188	-2.68745		-0.151485	0.289347	0.93167
P02533	Keratin, type I cytoskeletal 14 OS=Homo sapiens OX=9606 GN=KRT14 PE=1 SV=4 Keratin, type I cytoskeletal 17 OS=Homo sapiens OX=9606 GN=KRT17 PE=1 SV=2	[R].ILNEMRDQYEK.[M]	1xOxidation [M5]	115360	1.68631e+06	134454	156954	309710	340288		16.8158	20.6854	17.0368	17.26	18.2406	18.3764		-0.39092	1.9308	-0.683564	0.363546	1.76139	1.38399		-0.39092	1.9308	-0.683564	0.363546	1.76139	1.38399		0.884204	0.0182555	0.0639849
P02533	Keratin, type I cytoskeletal 14 OS=Homo sapiens OX=9606 GN=KRT14 PE=1 SV=4 Keratin, type I cytoskeletal 17 OS=Homo sapiens OX=9606 GN=KRT17 PE=1 SV=2	[R].ILNEMRDQYEK.[M]			460984	18462.7			67121.8			18.8144	14.1723			16.0345			0.0597109	-3.548			-0.957908		-4.9548	0.0597109	-3.548	-4.42593	-4.84923	-0.957908		-0.596661	0.0182555	0.0639849
Q86VS8	Protein Hook homolog 3 OS=Homo sapiens OX=9606 GN=HOOK3 PE=1 SV=2	[R].LLEVQSQVEELQK.[S]					104189	30052.9	54901.3					16.6688	14.8752	15.7446					-0.22759	-1.60396	-1.24785		-4.84526	-5.35174	-4.74908	-0.22759	-1.60396	-1.24785		3.95556	3.11702	3.2016
P62979	Ubiquitin-40S ribosomal protein S27a OS=Homo sapiens OX=9606 GN=RPS27A PE=1 SV=2	[R].LIFAGKQLEDGR.[T]		68140.6	130920	22444.2	115055	11116	110472		16.0562	16.9983	14.4541	16.812	13.4403	16.7533		-1.15048	-1.75631	-3.26627	-0.0844749	-3.03882	-0.239084		-1.15048	-1.75631	-3.26627	-0.0844749	-3.03882	-0.239084		0.936891	-0.073528	0.140305
P25705	ATP synthase subunit alpha, mitochondrial OS=Homo sapiens OX=9606 GN=ATP5F1A PE=1 SV=1	[R].ILGADTSVDLEETGR.[V]		28592.5	122407	60326	32749.3	18517.8	34634.4		14.8033	16.9013	15.8805	14.9992	14.1766	15.0799		-2.40335	-1.85332	-1.83983	-1.89726	-2.30255	-1.91248		-2.40335	-1.85332	-1.83983	-1.89726	-2.30255	-1.91248		-0.00526372	0.0271708	0.0299802
P63220	40S ribosomal protein S21 OS=Homo sapiens OX=9606 GN=RPS21 PE=1 SV=1	[R].IIGAKDHASIQMNVAEVDKVTGR.[F]	1xOxidation [M12]	245927	778936	450118	371893	188835	273435		17.9079	19.5711	18.7799	18.5045	17.5268	18.0608		0.701168	0.8165	1.05962	1.60809	1.04759	1.06844		0.701168	0.8165	1.05962	1.60809	1.04759	1.06844		0.382276	0.589821	1.02806
Q6NZI2	Caveolae-associated protein 1 OS=Homo sapiens OX=9606 GN=CAVIN1 PE=1 SV=1	[K].IIGAVDQIQLTQAQLEER.[Q]			989958	414451	28550		102097			19.917	18.6608	14.8012		16.6396			1.16236	0.940522	-2.09523		-0.352827		-5.02361	1.16236	0.940522	-2.09523	-4.87626	-0.352827		-1.46787	-1.10579	4.72458
P35579	Myosin-9 OS=Homo sapiens OX=9606 GN=MYH9 PE=1 SV=4	[R].IIGLDQVAGMSETALPGAFK.[T]	1xOxidation [M10]		1.95821e+06	804881			89121.2			20.9011	19.6184			16.4435			2.14646	1.89809			-0.54892		-4.82091	2.14646	1.89809	-4.50938	-4.62862	-0.54892		-2.97018	-1.7311	75.0609
Q9BU76	Multiple myeloma tumor-associated protein 2 OS=Homo sapiens OX=9606 GN=MMTAG2 PE=1 SV=1	[R].LLGLGSASGSVGR.[V]		257743	406101	394017	165387	117723	198437		17.9756	18.6315	18.5879	17.3355	16.845	17.5983		0.768873	-0.123166	0.867578	0.439046	0.365866	0.605922		0.768873	-0.123166	0.867578	0.439046	0.365866	0.605922		-0.0341507	-0.303794	0.479278
O15145	Actin-related protein 2/3 complex subunit 3 OS=Homo sapiens OX=9606 GN=ARPC3 PE=1 SV=3	[K].LIGNMALLPIR.[S]	1xOxidation [M5]	19552.9	533006	193267	37387.7	14053.2	49595.6		14.2551	19.0238	17.5602	15.1903	13.7786	15.5979		-2.95161	0.269146	-0.160083	-1.70616	-2.70056	-1.39448		-2.95161	0.269146	-0.160083	-1.70616	-2.70056	-1.39448		-0.986217	-1.05011	0.775014
Q13561	Dynactin subunit 2 OS=Homo sapiens OX=9606 GN=DCTN2 PE=1 SV=4	[K].LLGPDAAINLTDPDGALAK.[R]			122428							16.9016							-1.85307						-4.96872	-1.85307	-4.80564	-4.42463	-4.80801	-4.50894		-0.704718	-0.449546	0.324471
TGME49_245460-t26_1-p1	transcript=TGME49_245460-t26_1 | gene=TGME49_245460 | organism=Toxoplasma_gondii_ME49 | gene_product=ribosomal protein RPS8 | transcript_product=ribosomal protein RPS8 | location=TGME49_chrXII:2284189-2287999(-) | protein_length=205 | sequence_SO=chromosome | SO=protein_coding | is_pseudo=false	[R].LLGVVYNASNNELVR.[T]			115883				66465.9			16.8223				16.0203			-1.93234				-0.972076		-4.85856	-1.93234	-4.74933	-4.66197	-4.87145	-0.972076		0.344912	0.344912	0.252572
Q96FQ6	Protein S100-A16 OS=Homo sapiens OX=9606 GN=S100A16 PE=1 SV=1	[K].LIHEQEQQSSS.[-]		1.2344e+06	2.65588e+06	1411108	1.11302e+06	825089	748835		20.2354	21.3408	20.4284	20.0861	19.6542	19.5143		3.02868	2.58612	2.70808	3.18962	3.17502	2.52189		3.02868	2.58612	2.70808	3.18962	3.17502	2.52189		0.187884	-0.136639	0.2548
P35580	Myosin-10 OS=Homo sapiens OX=9606 GN=MYH10 PE=1 SV=3	[K].LLKDAEALSQRLEEK.[A]			2.19146e+06	343382	84057.7		101881			21.0635	18.3895	16.3591		16.6365			2.30882	0.669134	-0.537344		-0.355874		-4.98656	2.30882	0.669134	-0.537344	-4.65473	-0.355874		-1.17978	-1.95045	59.9637
P08670	Vimentin OS=Homo sapiens OX=9606 GN=VIM PE=1 SV=4	[K].ILLAELEQLK.[G]			907942	328769	23821		86692.4			19.7922	18.3267	14.5399		16.4036			1.0376	0.606393	-2.35649		-0.588783		-4.89734	1.0376	0.606393	-2.35649	-4.85711	-0.588783		-1.51634	-1.45396	18.1104
P08670	Vimentin OS=Homo sapiens OX=9606 GN=VIM PE=1 SV=4	[K].ILLAELEQLKGQGK.[S]		90855	9.50351e+06	2.15907e+06	515681		1.00806e+06		16.4713	23.18	21.042	18.9761		19.9432		-0.735424	4.42538	3.32166	2.07968		2.95075		-0.735424	4.42538	3.32166	2.07968	-4.73891	2.95075		-2.24003	-1.45396	18.1104
P47755	F-actin-capping protein subunit alpha-2 OS=Homo sapiens OX=9606 GN=CAPZA2 PE=1 SV=3	[R].LLLNNDNLLR.[E]		31953.4	440442	170902	50800.8		86469.5		14.9637	18.7486	17.3828	15.6326		16.3999		-2.24302	-0.00605372	-0.33751	-1.26387		-0.592498		-2.24302	-0.00605372	-0.33751	-1.26387	-4.69505	-0.592498		-1.32161	-1.32161	1.22783
P62979	Ubiquitin-40S ribosomal protein S27a OS=Homo sapiens OX=9606 GN=RPS27A PE=1 SV=2	[K].YYKVDENGK.[I]		6.96748e+06	9.81035e+06	8.30179e+06	1.15414e+06	4.28669e+06	3.85219e+06		22.7322	23.2259	22.985	20.1384	22.0314	21.8772		5.5255	4.47123	5.26467	3.24195	5.55226	4.88484		5.5255	4.47123	5.26467	3.24195	5.55226	4.88484		-0.527449	-0.073528	0.140305
P62263	40S ribosomal protein S14 OS=Homo sapiens OX=9606 GN=RPS14 PE=1 SV=3	[K].IGRIEDVTPIPSDSTRR.[K]		220528	574839	273696	422804	38208.4	117229		17.7506	19.1328	18.0622	18.6896	15.2216	16.839		0.543903	0.378152	0.341893	1.7932	-1.25757	-0.153429		0.543903	0.378152	0.341893	1.7932	-1.25757	-0.153429		-0.293918	-0.540914	1.31712
P35579	Myosin-9 OS=Homo sapiens OX=9606 GN=MYH9 PE=1 SV=4	[K].QTLENERGELANEVK.[V]		286723	9.12384e+06	3.34948e+06	234408	236285	794628		18.1293	23.1212	21.6755	17.8387	17.8502	19.5999		0.922594	4.36656	3.95518	0.942225	1.371	2.60752		0.922594	4.36656	3.95518	0.942225	1.371	2.60752		-1.4412	-1.7311	75.0609
P06396	Gelsolin OS=Homo sapiens OX=9606 GN=GSN PE=1 SV=1	[K].QTQVSVLPEGGETPLFK.[Q]		58304.9	3.07126e+06	968994	61512.9		170163		15.8313	21.5504	19.8861	15.9086		17.3766		-1.37537	2.79576	2.16581	-0.987834		0.384159		-1.37537	2.79576	2.16581	-0.987834	-4.63355	0.384159		-2.94114	-2.34499	12.1468
TGME49_220240-t26_1-p1	transcript=TGME49_220240-t26_1 | gene=TGME49_220240 | organism=Toxoplasma_gondii_ME49 | gene_product=hypothetical protein | transcript_product=hypothetical protein | location=TGME49_chrV:238210-239790(-) | protein_length=526 | sequence_SO=chromosome | SO=protein_coding | is_pseudo=false	[R].VDASSLLGTR.[S]					55295.9	28480.4	30497.5					15.7549	14.7977	14.8964					-1.14155	-1.68149	-2.096		-4.89942	-5.25328	-4.90813	-1.14155	-1.68149	-2.096		3.3806	2.34328	1.56722
P35580	Myosin-10 OS=Homo sapiens OX=9606 GN=MYH10 PE=1 SV=3	[K].VDDDLGTIESLEEAK.[K]			366223	244534						18.4824	17.8997						-0.272284	0.179356					-5.07805	-0.272284	0.179356	-4.40782	-4.70767	-4.45584		-2.80012	-1.95045	59.9637
Q09666	Neuroblast differentiation-associated protein AHNAK OS=Homo sapiens OX=9606 GN=AHNAK PE=1 SV=2	[K].VDIDTPDINIEGSEGK.[F]																							-5.00491	-5.15387	-4.91358	-4.40849	-4.67404	-4.46446		0.508454	0.593635	3.00819
P35908	Keratin, type II cytoskeletal 2 epidermal OS=Homo sapiens OX=9606 GN=KRT2 PE=1 SV=2	[K].VDLLNQEIEFLK.[V]			2.08797e+06	70198.6			116516			20.9937	16.0992			16.8302			2.23902	-1.62117			-0.162235		-5.0667	2.23902	-1.62117	-4.54216	-4.90793	-0.162235		-1.72116	0.181252	0.903762
P01834	Immunoglobulin kappa constant OS=Homo sapiens OX=9606 GN=IGKC PE=1 SV=2	[K].VDNALQSGNSQESVTEQDSK.[D]			25075.1							14.614							-4.14068						-4.96365	-4.14068	-4.68255	-4.51961	-4.62456	-4.68726		-0.0148507	-0.0148507	0.0633298
P13647	Keratin, type II cytoskeletal 5 OS=Homo sapiens OX=9606 GN=KRT5 PE=1 SV=3	[K].VDALMDEINFMK.[M]	2xOxidation [M5	33485.5	994079	124230	27091.2	40204.9	102895		15.0313	19.923	16.9226	14.7255	15.2951	16.6508		-2.17545	1.16836	-0.797671	-2.1709	-1.18409	-0.341592		-2.17545	1.16836	-0.797671	-2.1709	-1.18409	-0.341592		-0.630604	0.091607	0.259862
P06748	Nucleophosmin OS=Homo sapiens OX=9606 GN=NPM1 PE=1 SV=2	[K].VDNDENEHQLSLR.[T]			111030	46151.4			24270.1			16.7606	15.4941			14.5669			-1.99406	-2.22623			-2.42551		-4.907	-1.99406	-2.22623	-4.46539	-4.67237	-2.42551		-0.811993	-0.360569	0.444062
Q7Z794	Keratin, type II cytoskeletal 1b OS=Homo sapiens OX=9606 GN=KRT77 PE=2 SV=3	[R].VDTLTGEVNFLK.[Y]			341981	34959.6			54334.3			18.3836	15.0934			15.7296			-0.371088	-2.62692			-1.26283		-4.9131	-0.371088	-2.62692	-4.45626	-4.85812	-1.26283		-0.888695	-0.625626	1.34926
P02751	Fibronectin OS=Homo sapiens OX=9606 GN=FN1 PE=1 SV=4	[R].VDVIPVNLPGEHGQR.[L]		172132	406365	195144		15511	36845.4		17.3932	18.6324	17.5742		13.921	15.1692		0.18645	-0.122227	-0.146141		-2.55817	-1.8232		0.18645	-0.122227	-0.146141	-4.49181	-2.55817	-1.8232		-2.93042	-1.69425	11.343
P35579	Myosin-9 OS=Homo sapiens OX=9606 GN=MYH9 PE=1 SV=4	[K].VEAQLQELQVK.[F]			543588	251663		24092.3	69208.7			19.0522	17.9411		14.5563	16.0787			0.297509	0.220812		-1.92289	-0.913737		-4.89298	0.297509	0.220812	-4.57653	-1.92289	-0.913737		-1.01283	-1.7311	75.0609
P35580	Myosin-10 OS=Homo sapiens OX=9606 GN=MYH10 PE=1 SV=3	[K].VEGELEEMER.[K]			148276	52546.9						17.1779	15.6813						-1.57672	-2.039					-4.94518	-1.57672	-2.039	-4.41625	-4.69071	-4.45331		-1.66645	-1.95045	59.9637
Q9Y383	Putative RNA-binding protein Luc7-like 2 OS=Homo sapiens OX=9606 GN=LUC7L2 PE=1 SV=2	[K].VEQLGAEGNVEESQK.[V]		25422.4	65536.4	86348.9	11107.9	18932.2	108238		14.6338	16	16.3979	13.4393	14.2086	16.7238		-2.57289	-2.75464	-1.32243	-3.45714	-2.27062	-0.268558		-2.57289	-2.75464	-1.32243	-3.45714	-2.27062	-0.268558		0.21788	0.418591	0.610412
Q9Y383	Putative RNA-binding protein Luc7-like 2 OS=Homo sapiens OX=9606 GN=LUC7L2 PE=1 SV=2	[K].VEQLGAEGNVEESQKVMDEVEK.[A]	1xOxidation [M17]			80324.3			94765.1				16.2935			16.5321				-1.42677			-0.460334		-5.05147	-5.41035	-1.42677	-4.48753	-4.78405	-0.460334		0.718889	0.418591	0.610412
P04264	Keratin, type II cytoskeletal 1 OS=Homo sapiens OX=9606 GN=KRT1 PE=1 SV=6	[R].VDQLKSDQSR.[L]			206980				51572.7			17.6591				15.6543			-1.09551				-1.33808		-5.06003	-1.09551	-4.6992	-4.54981	-4.68248	-1.33808		0.0947894	-0.0837483	0.431184
Q9BU76	Multiple myeloma tumor-associated protein 2 OS=Homo sapiens OX=9606 GN=MMTAG2 PE=1 SV=1	[R].VESGGPGTSAASAR.[R]		229652	232798	214980	116763	120296			17.8091	17.8287	17.7138	16.8332	16.8762			0.602384	-0.925928	-0.00648089	-0.0632078	0.397055			0.602384	-0.925928	-0.00648089	-0.0632078	0.397055	-4.6559		-1.33067	-0.303794	0.479278
P08708	40S ribosomal protein S17 OS=Homo sapiens OX=9606 GN=RPS17 PE=1 SV=2	[R].VCEEIAIIPSKK.[L]	1xCarbamidomethyl [C2]	523570	3.78937e+06	1.16514e+06	342026	246635	279964		18.998	21.8535	20.1521	18.3837	17.912	18.0949		1.79132	3.09888	2.43175	1.48731	1.43285	1.10248		1.79132	3.09888	2.43175	1.48731	1.43285	1.10248		-1.09977	-1.23491	4.32648
Q8IZP2	Putative protein FAM10A4 OS=Homo sapiens OX=9606 GN=ST13P4 PE=5 SV=1	[K].VAAIEALNDGELQK.[A]			43405.5		19435		24097.7			15.4056		14.2464		14.5566			-3.34906		-2.65006		-2.4358		-4.79975	-3.34906	-4.79658	-2.65006	-4.83484	-2.4358		1.00823	1.00823	1.56172
P48047	ATP synthase subunit O, mitochondrial OS=Homo sapiens OX=9606 GN=ATP5PO PE=1 SV=1	[K].VAASVLNPYVK.[R]		90772.7	226803	150702	64006.9	31408.7			16.47	17.7911	17.2013	15.9659	14.9389			-0.736732	-0.963567	-0.518982	-0.930497	-1.5403			-0.736732	-0.963567	-0.518982	-0.930497	-1.5403	-4.57175		-1.60776	-0.9647	1.34484
P35579	Myosin-9 OS=Homo sapiens OX=9606 GN=MYH9 PE=1 SV=4	[K].VAAYDKLEK.[T]		552075	1.2919e+07	5.34293e+06	407115	492230	1.05591e+06		19.0745	23.623	22.3492	18.6351	18.909	20.0101		1.8678	4.86835	4.62888	1.73864	2.4298	3.01766		1.8678	4.86835	4.62888	1.73864	2.4298	3.01766		-1.39298	-1.7311	75.0609
TGME49_229670-t26_1-p1	transcript=TGME49_229670-t26_1 | gene=TGME49_229670 | organism=Toxoplasma_gondii_ME49 | gene_product=ribosomal protein RPS23 | transcript_product=ribosomal protein RPS23 | location=TGME49_chrVIII:371876-374724(+) | protein_length=143 | sequence_SO=chromosome | SO=protein_coding | is_pseudo=false	[K].VAGASLLALFK.[E]			76970.9	49332.8	22970.5		42672.9			16.232	15.5903	14.4875		15.381			-2.52262	-2.13006	-2.40894		-1.61137		-4.86833	-2.52262	-2.13006	-2.40894	-4.70989	-1.61137		0.263604	0.576602	0.420975
TGME49_207840-t26_1-p1	transcript=TGME49_207840-t26_1 | gene=TGME49_207840 | organism=Toxoplasma_gondii_ME49 | gene_product=ribosomal protein RPS17 | transcript_product=ribosomal protein RPS17 | location=TGME49_chrIb:327322-329024(-) | protein_length=132 | sequence_SO=chromosome | SO=protein_coding | is_pseudo=false	[R].VAGFVTHLMK.[R]	1xOxidation [M9]	39735.9	70439.1	28022	64255.2	70800.7	44569.7		15.2782	16.1041	14.7743	15.9715	16.1115	15.4438		-1.92855	-2.65056	-2.94605	-0.924911	-0.367697	-1.54863		-1.92855	-2.65056	-2.94605	-0.924911	-0.367697	-1.54863		1.56131	0.543804	0.7024
P21333	Filamin-A OS=Homo sapiens OX=9606 GN=FLNA PE=1 SV=4	[R].VANPSGNLTETYVQDR.[G]		74121.5	494791	241428	65224.7	43744.1	149631		16.1776	18.9165	17.8812	15.9931	15.4168	17.191		-1.0291	0.161815	0.160913	-0.903305	-1.06237	0.198644		-1.0291	0.161815	0.160913	-0.903305	-1.06237	0.198644		-0.353554	-0.801463	6.54648
P08708	40S ribosomal protein S17 OS=Homo sapiens OX=9606 GN=RPS17 PE=1 SV=2	[R].VCEEIAIIPSK.[K]	1xCarbamidomethyl [C2]	214990	1.30218e+06	459004	165739	81094.8	115306		17.7139	20.3125	18.8081	17.3386	16.3073	16.8151		0.50721	1.55786	1.08783	0.442114	-0.171851	-0.177298		0.50721	1.55786	1.08783	0.442114	-0.171851	-0.177298		-1.01998	-1.23491	4.32648
P62266	40S ribosomal protein S23 OS=Homo sapiens OX=9606 GN=RPS23 PE=1 SV=3	[K].VANVSLLALYK.[G]		459122	3760012	2611505	422571	219662	1.35817e+06		18.8085	21.8423	21.3165	18.6888	17.7449	20.3732		1.60182	3.08766	3.59613	1.7924	1.26575	3.38083		1.60182	3.08766	3.59613	1.7924	1.26575	3.38083		-0.615542	-0.332036	0.529608
P60709	Actin, cytoplasmic 1 OS=Homo sapiens OX=9606 GN=ACTB PE=1 SV=1	[R].VAPEEHPVLLTEAPLNPK.[A]		2.28224e+06	5.4061e+07	2.06183e+07	2.19137e+06	748126	4.41879e+06		21.122	25.6881	24.2974	21.0634	19.5129	22.0752		3.91532	6.93344	6.5771	4.16697	3.03375	5.08282		3.91532	6.93344	6.5771	4.16697	3.03375	5.08282		-1.71411	-1.70874	12.7917
P62318	Small nuclear ribonucleoprotein Sm D3 OS=Homo sapiens OX=9606 GN=SNRPD3 PE=1 SV=1	[R].VAQLEQVYIR.[G]			54720.9				176708			15.7398				17.431			-3.01484				0.43861		-4.98026	-3.01484	-4.72638	-4.55997	-4.75684	0.43861		1.2811	1.2811	0.892707
P21333	Filamin-A OS=Homo sapiens OX=9606 GN=FLNA PE=1 SV=4	[K].VAQPTITDNKDGTVTVR.[Y]		322373	844545	515863	275707	152327	148496		18.2984	19.6878	18.9766	18.0728	17.2168	17.1801		1.09167	0.93317	1.25631	1.17634	0.737639	0.187667		1.09167	0.93317	1.25631	1.17634	0.737639	0.187667		-0.393165	-0.801463	6.54648
TGME49_309930-t26_1-p1	transcript=TGME49_309930-t26_1 | gene=TGME49_309930 | organism=Toxoplasma_gondii_ME49 | gene_product=melibiase subfamily protein | transcript_product=melibiase subfamily protein | location=TGME49_chrXI:909349-915530(-) | protein_length=982 | sequence_SO=chromosome | SO=protein_coding | is_pseudo=false	[R].VAQTAGRDDSVPVGEK.[L]						34509.1							15.0747							-1.40449			-4.87752	-5.35192	-4.78159	-4.46309	-1.40449	-4.52102		1.54081	3.07128	4.30033
Q07065	Cytoskeleton-associated protein 4 OS=Homo sapiens OX=9606 GN=CKAP4 PE=1 SV=2	[K].VASLEESEGNKQDLK.[A]		60282.2	263239	79878.3	68158.4	52482.2	81185.2		15.8794	18.006	16.2855	16.0566	15.6795	16.3089		-1.32726	-0.748632	-1.43481	-0.839832	-0.799633	-0.683472		-1.32726	-0.748632	-1.43481	-0.839832	-0.799633	-0.683472		0.395919	0.114884	0.322937
P02545	Prelamin-A/C OS=Homo sapiens OX=9606 GN=LMNA PE=1 SV=1	[R].VAVEEVDEEGKFVR.[L]		150308	373462	152094	29599.1	17101.5	63548.4		17.1976	18.5106	17.2146	14.8533	14.0618	15.9556		-0.00913941	-0.244043	-0.505721	-2.04317	-2.41733	-1.03683		-0.00913941	-0.244043	-0.505721	-2.04317	-2.41733	-1.03683		-1.57948	-0.90132	4.27226
P68133	Actin, alpha skeletal muscle OS=Homo sapiens OX=9606 GN=ACTA1 PE=1 SV=1	[R].VAPEEHPTLLTEAPLNPK.[A]			541138	347947	46326		257490			19.0456	18.4085	15.4995		17.9742			0.290991	0.688188	-1.3969		0.981752		-5.02463	0.290991	0.688188	-1.3969	-4.78094	0.981752		-0.383548	-1.07786	0.795
TGME49_239740-t26_1-p1	transcript=TGME49_239740-t26_1 | gene=TGME49_239740 | organism=Toxoplasma_gondii_ME49 | gene_product=dense granule protein GRA14 | transcript_product=dense granule protein GRA14 | location=TGME49_chrVI:883160-884386(-) | protein_length=408 | sequence_SO=chromosome | SO=protein_coding | is_pseudo=false	[K].VAALAVLTMALLK.[Y]	1xOxidation [M9]				235494		224358					17.8453		17.7754					0.948894		0.783039		-5.04523	-5.13406	-4.67219	0.948894	-4.85562	0.783039		3.90927	5.93448	38.4972
P08670	Vimentin OS=Homo sapiens OX=9606 GN=VIM PE=1 SV=4	[K].VESLQEEIAFLKK.[L]			37993.7							15.2135							-3.54117						-4.84114	-3.54117	-4.68851	-4.51934	-4.89315	-4.62649		-0.32272	-1.45396	18.1104
P08670	Vimentin OS=Homo sapiens OX=9606 GN=VIM PE=1 SV=4	[R].VEVERDNLAEDIMR.[L]			523714	121838			25214.7			18.9984	16.8946			14.622			0.243775	-0.825716			-2.37043		-4.99483	0.243775	-0.825716	-4.53542	-4.82895	-2.37043		-2.05267	-1.45396	18.1104
Q09666	Neuroblast differentiation-associated protein AHNAK OS=Homo sapiens OX=9606 GN=AHNAK PE=1 SV=2	[K].VGVEVPDVNIEGPEGK.[L]			36581.6							15.1588							-3.59581						-4.99696	-3.59581	-4.73776	-4.53121	-4.90408	-4.42337		-0.176045	0.593635	3.00819
Q9NQ29	Putative RNA-binding protein Luc7-like 1 OS=Homo sapiens OX=9606 GN=LUC7L PE=1 SV=1 Putative RNA-binding protein Luc7-like 2 OS=Homo sapiens OX=9606 GN=LUC7L2 PE=1 SV=2	[KR].VHELNEEIGK.[L]		67942.6	252129	216014	34758.9	38622.2	381727		16.052	17.9438	17.7208	15.0851	15.2371	18.5422		-1.15467	-0.810843	0.00044637	-1.81134	-1.24203	1.54978		-1.15467	-0.810843	0.00044637	-1.81134	-1.24203	1.54978		0.153826	0.795586	0.587041
P21333	Filamin-A OS=Homo sapiens OX=9606 GN=FLNA PE=1 SV=4	[R].VHGPGIQSGTTNKPNK.[F]			247836							17.919							-0.835617						-4.95339	-0.835617	-4.91208	-4.53498	-4.74589	-4.67791		-1.08589	-0.801463	6.54648
P27635	60S ribosomal protein L10 OS=Homo sapiens OX=9606 GN=RPL10 PE=1 SV=4	[R].VHIGQVIMSIR.[T]	1xOxidation [M8]	150452	1.40141e+06	546898	223292	53794.3	180365		17.1989	20.4185	19.0609	17.7686	15.7152	17.4606		-0.00775924	1.66381	1.34059	0.872134	-0.764006	0.468155		-0.00775924	1.66381	1.34059	0.872134	-0.764006	0.468155		-0.806785	-0.588603	1.02556
P04080	Cystatin-B OS=Homo sapiens OX=9606 GN=CSTB PE=1 SV=2	[K].VHVGDEDFVHLR.[V]		54173.8	306878	249467	152712	45948.5	324515		15.7253	18.2273	17.9285	17.2205	15.4877	18.3079		-1.4814	-0.52734	0.208167	0.324019	-0.991443	1.31552		-1.4814	-0.52734	0.208167	0.324019	-0.991443	1.31552		0.816222	1.00384	1.10439
P06396	Gelsolin OS=Homo sapiens OX=9606 GN=GSN PE=1 SV=1	[R].VHVSEEGTEPEAMLQVLGPKPALPAGTEDTAKEDAANR.[K]	1xOxidation [M13]		559195	324025			42574.9			19.093	18.3057			15.3777			0.338347	0.585423			-1.61469		-4.95425	0.338347	0.585423	-4.57918	-4.81452	-1.61469		-2.32597	-2.34499	12.1468
P62263	40S ribosomal protein S14 OS=Homo sapiens OX=9606 GN=RPS14 PE=1 SV=3	[K].VKADRDESSPYAAMLAAQDVAQR.[C]	1xOxidation [M14]	62570.7	476385	396774	21361.1	7258.67	161298		15.9332	18.8618	18.598	14.3827	12.8255	17.2994		-1.2735	0.107122	0.877638	-2.51374	-3.65368	0.306963		-1.2735	0.107122	0.877638	-2.51374	-3.65368	0.306963		-1.85724	-0.540914	1.31712
P27816	Microtubule-associated protein 4 OS=Homo sapiens OX=9606 GN=MAP4 PE=1 SV=3	[K].VGSLDNVGHLPAGGAVK.[T]			37927.9	21833.4		17012.6				15.211	14.4142		14.0543				-3.54368	-3.30607		-2.42486			-5.03671	-3.54368	-3.30607	-4.62072	-2.42486	-4.50406		0.112274	-0.138102	0.0951257
Q9Y3C1	Nucleolar protein 16 OS=Homo sapiens OX=9606 GN=NOP16 PE=1 SV=2	[K].VKAMEVDIEERPK.[E]	1xOxidation [M4]	49376.5	70206.6		12399				15.5915	16.0993		13.5979				-1.61517	-2.65533		-3.29849				-1.61517	-2.65533	-4.92705	-3.29849	-4.71299	-4.42549		-1.07981	-1.49091	4.31549
P35579	Myosin-9 OS=Homo sapiens OX=9606 GN=MYH9 PE=1 SV=4	[K].VKLQEMEGTVK.[S]	1xOxidation [M6]	229836	1.72088e+06	589259		164611	213742		17.8102	20.7147	19.1685		17.3287	17.7055		0.60354	1.96007	1.44822		0.849531	0.71311		0.60354	1.96007	1.44822	-4.44296	0.849531	0.71311		-2.29738	-1.7311	75.0609
Q9NZR1	Tropomodulin-2 OS=Homo sapiens OX=9606 GN=TMOD2 PE=1 SV=1	[K].VKPVFEEPPNPTNVEISLQQMK.[A]	1xOxidation [M21]		426661	157425						18.7027	17.2643						-0.0519152	-0.456015					-5.0002	-0.0519152	-0.456015	-4.54744	-4.86115	-4.51452		-2.80499	-2.33979	2.53797
P35579	Myosin-9 OS=Homo sapiens OX=9606 GN=MYH9 PE=1 SV=4	[K].VKVNKDDIQK.[M]			2.46594e+06	726389						21.2337	19.4704						2.47906	1.75006					-5.05222	2.47906	1.75006	-4.4776	-4.85314	-4.5932		-4.36695	-1.7311	75.0609
TGME49_251540-t26_1-p1	transcript=TGME49_251540-t26_1 | gene=TGME49_251540 | organism=Toxoplasma_gondii_ME49 | gene_product=dense granule protein GRA9 | transcript_product=dense granule protein GRA9 | location=TGME49_chrXII:5450509-5452072(+) | protein_length=318 | sequence_SO=chromosome | SO=protein_coding | is_pseudo=false	[R].VLAGDFEGFSR.[T]					1.07179e+06	155392	684096					20.0316	17.2456	19.3838					3.13515	0.766384	2.39144		-4.87364	-5.35715	-4.8051	3.13515	0.766384	2.39144		7.10962	5.26774	9.74639
Q02413	Desmoglein-1 OS=Homo sapiens OX=9606 GN=DSG1 PE=1 SV=2	[R].VIAPSSSLPTSLTIHHPR.[E]			529572	93217.7	89181.8	28733.9	136425			19.0145	16.5083	16.4445	14.8105	17.0578			0.259823	-1.212	-0.451974	-1.66871	0.0653493		-5.02384	0.259823	-1.212	-0.451974	-1.66871	0.0653493		1.3069	0.349231	0.963474
Q02878	60S ribosomal protein L6 OS=Homo sapiens OX=9606 GN=RPL6 PE=1 SV=3	[K].VLATVTKPVGGDK.[N]			97955.5	54541.3		36188.4	35682.3			16.5798	15.7351		15.1432	15.1229			-2.17481	-1.98526		-1.33593	-1.86948		-4.93144	-2.17481	-1.98526	-4.62802	-1.33593	-1.86948		0.419359	0.419359	0.360659
P02452	Collagen alpha-1(I) chain OS=Homo sapiens OX=9606 GN=COL1A1 PE=1 SV=5	[K].VLCDDVICDETK.[N]	2xCarbamidomethyl [C3	69163.3	55469.4						16.0777	15.7594						-1.12898	-2.99524						-1.12898	-2.99524	-4.71932	-4.65049	-4.87003	-4.61404		-1.76367	-1.1456	6.43533
P68104	Elongation factor 1-alpha 1 OS=Homo sapiens OX=9606 GN=EEF1A1 PE=1 SV=1	[R].VETGVLKPGMVVTFAPVNVTTEVK.[S]	1xOxidation [M10]		683588	426546	102709		299938			19.3828	18.7023	16.6482		18.1943			0.628123	0.982023	-0.248238		1.2019		-4.93806	0.628123	0.982023	-0.248238	-4.61894	1.2019		-0.112451	0.343021	0.48797
P56945	Breast cancer anti-estrogen resistance protein 1 OS=Homo sapiens OX=9606 GN=BCAR1 PE=1 SV=2	[R].VGQGYVYEAAQPEQDEYDIPR.[H]			387884	141978	32434.2					18.5653	17.1153	14.9852					-0.189381	-0.605018	-1.91121				-4.97363	-0.189381	-0.605018	-1.91121	-4.85422	-4.6616		-1.88633	-1.30325	6.48799
Q71U36	Tubulin alpha-1A chain OS=Homo sapiens OX=9606 GN=TUBA1A PE=1 SV=1	[K].VGINYQPPTVVPGGDLAK.[V]		31053.3	334958	146428	34673		75571.3		14.9225	18.3536	17.1598	15.0815		16.2056		-2.28424	-0.401024	-0.560488	-1.81491		-0.786852		-2.28424	-0.401024	-0.560488	-1.81491	-4.87744	-0.786852		-1.41115	-0.302859	0.477627
P08670	Vimentin OS=Homo sapiens OX=9606 GN=VIM PE=1 SV=4	[R].VEVERDNLAEDIMR.[L]	1xOxidation [M13]	517465	3.55184e+06	1.09429e+06	340913	170867	360458		18.9811	21.7601	20.0616	18.379	17.3825	18.4595		1.7744	3.00549	2.34125	1.48261	0.903345	1.46707		1.7744	3.00549	2.34125	1.48261	0.903345	1.46707		-1.08937	-1.45396	18.1104
P0DP25	Calmodulin-3 OS=Homo sapiens OX=9606 GN=CALM3 PE=1 SV=1	[R].VFDKDGNGYISAAELR.[H]		177262	4.66648e+06	4.61594e+06	1.2567e+06	169147	2.84579e+06		17.4355	22.1539	22.1382	20.2612	17.3679	21.4404		0.22882	3.39926	4.41787	3.36478	0.888742	4.44799		0.22882	3.39926	4.41787	3.36478	0.888742	4.44799		0.218521	-0.169172	0.299648
P08590	Myosin light chain 3 OS=Homo sapiens OX=9606 GN=MYL3 PE=1 SV=3 Myosin light polypeptide 6 OS=Homo sapiens OX=9606 GN=MYL6 PE=1 SV=2	[R].VFDKEGNGTVMGAELR.[H]			5.97814e+07	2.57963e+07	995736		9.14107e+06			25.8332	24.6207	19.9254		23.1239			7.07855	6.90034	3.02897		6.13153		-5.05107	7.07855	6.90034	3.02897	-4.73037	6.13153		-1.49923	-0.914536	1.50742
P08590	Myosin light chain 3 OS=Homo sapiens OX=9606 GN=MYL3 PE=1 SV=3 Myosin light polypeptide 6 OS=Homo sapiens OX=9606 GN=MYL6 PE=1 SV=2	[R].VFDKEGNGTVMGAELR.[H]	1xOxidation [M11]	9.4775e+06	6.58197e+07	2.95842e+07	8.25315e+06	7.83225e+06	1.43518e+07		23.1761	25.972	24.8183	22.9765	22.901	23.7747		5.96937	7.21737	7.098	6.08008	6.42182	6.78233		5.96937	7.21737	7.098	6.08008	6.42182	6.78233		-0.333506	-0.914536	1.50742
P22061	Protein-L-isoaspartate(D-aspartate) O-methyltransferase OS=Homo sapiens OX=9606 GN=PCMT1 PE=1 SV=4	[K].VFEVMLATDR.[S]	1xOxidation [M5]	23201.9			38237.9				14.502			15.2227				-2.70475			-1.67372				-2.70475	-5.23561	-4.79196	-1.67372	-4.80466	-4.69673		0.519067	-0.592724	1.15139
P61247	40S ribosomal protein S3a OS=Homo sapiens OX=9606 GN=RPS3A PE=1 SV=2	[R].VFEVSLADLQNDEVAFR.[K]			139380	66879.5						17.0887	16.0293						-1.66598	-1.69104					-4.93479	-1.66598	-1.69104	-4.48134	-4.81689	-4.64736		-1.88459	-0.976845	5.34325
Q9NR99	Matrix-remodeling-associated protein 5 OS=Homo sapiens OX=9606 GN=MXRA5 PE=1 SV=3	[K].VFGNNNIPEAR.[N]		120247	51894.6	18396.3		10839.7			16.8756	15.6633	14.1671		13.404			-0.331067	-3.09135	-3.5532		-3.07513			-0.331067	-3.09135	-3.5532	-4.67626	-3.07513	-4.41283		-1.72953	-1.35037	2.35877
P61160	Actin-related protein 2 OS=Homo sapiens OX=9606 GN=ACTR2 PE=1 SV=1	[K].VGNIEIKDLMVGDEASELR.[S]	1xOxidation [M10]		94162.9							16.5229							-2.23177						-4.79204	-2.23177	-4.84657	-4.60957	-4.8201	-4.5132		-0.690831	-1.12844	0.831126
P07910	Heterogeneous nuclear ribonucleoproteins C1/C2 OS=Homo sapiens OX=9606 GN=HNRNPC PE=1 SV=4	[R].VFIGNLNTLVVK.[K]			51688.9	29552.7			53122.1			15.6576	14.851			15.697			-3.09708	-2.86932			-1.29538		-5.0689	-3.09708	-2.86932	-4.50403	-4.81048	-1.29538		0.141805	-0.56118	0.85365
P69905	Hemoglobin subunit alpha OS=Homo sapiens OX=9606 GN=HBA1 PE=1 SV=2	[K].VGAHAGEYGAEALER.[M]		130972	235523	114824	154749	21755.5	93687.3		16.9989	17.8455	16.8091	17.2396	14.4091	16.5156		-0.207806	-0.90914	-0.911253	0.343139	-2.07008	-0.476836		-0.207806	-0.90914	-0.911253	0.343139	-2.07008	-0.476836		-0.0585271	0.496165	0.633538
P02751	Fibronectin OS=Homo sapiens OX=9606 GN=FN1 PE=1 SV=4	[R].VGDTYERPK.[D]		321601		204913	19334.2	43724.5	69240		18.2949		17.6447	14.2389	15.4162	16.0793		1.08821		-0.0756686	-2.65757	-1.06302	-0.913083		1.08821	-5.28439	-0.0756686	-2.65757	-1.06302	-0.913083		-0.120608	-1.69425	11.343
Q6E0U4	Dermokine OS=Homo sapiens OX=9606 GN=DMKN PE=1 SV=3	[R].VGEAAHALGNTGHEIGR.[Q]			25183.8			17437.4	31571.6			14.6202			14.0899	14.9463			-4.13444			-2.38928	-2.04606		-4.82989	-4.13444	-4.85616	-4.44394	-2.38928	-2.04606		1.64707	1.64707	2.74257
Q8IXM2	Chromatin complexes subunit BAP18 OS=Homo sapiens OX=9606 GN=BAP18 PE=1 SV=1	[K].VGEIFSAAGAAFTK.[L]			55081.8	42489.7	29799.9		45463.4			15.7493	15.3748	14.863		15.4724			-3.00536	-2.3455	-2.03341		-1.51998		-4.99904	-3.00536	-2.3455	-2.03341	-4.7806	-1.51998		0.671966	0.671966	0.664223
P07305	Histone H1.0 OS=Homo sapiens OX=9606 GN=H1F0 PE=1 SV=3	[K].VGENADSQIK.[L]		3.05976e+07	7.14221e+07	3.30788e+07	1.16895e+07	1.26728e+07	1.3571e+07		24.8669	26.0899	24.9794	23.4787	23.5952	23.694		7.66021	7.33522	7.25908	6.58228	7.11606	6.70162		7.66021	7.33522	7.25908	6.58228	7.11606	6.70162		-0.618187	-0.798558	2.45748
Q9NSB2	Keratin, type II cuticular Hb4 OS=Homo sapiens OX=9606 GN=KRT84 PE=2 SV=2	[R].VGGVGVPAAPSITAVTVNK.[S]			116222							16.8265							-1.92812						-4.85889	-1.92812	-4.73577	-4.52618	-4.82655	-4.4769		-0.768949	-0.446114	0.455673
P04080	Cystatin-B OS=Homo sapiens OX=9606 GN=CSTB PE=1 SV=2	[R].VFQSLPHENKPLTLSNYQTNK.[A]			309722	201929	159811	10446.6	332647			18.2406	17.6235	17.286	13.3507	18.3436			-0.514033	-0.0968324	0.389574	-3.12843	1.35123		-4.82941	-0.514033	-0.0968324	0.389574	-3.12843	1.35123		1.35088	1.00384	1.10439
Q02413	Desmoglein-1 OS=Homo sapiens OX=9606 GN=DSG1 PE=1 SV=2	[K].TYVVTGNMGSNDKVGDFVATDLDTGRPSTTVR.[Y]	1xOxidation [M8]		899328				449457			19.7785				18.7778			1.02384				1.78542		-4.98652	1.02384	-4.91297	-4.50212	-4.64036	1.78542		0.506194	0.349231	0.963474
P50402	Emerin OS=Homo sapiens OX=9606 GN=EMD PE=1 SV=1	[R].TYGEPESAGPSR.[A]		87511.6	97417.4		38224.4	18584	24408.2		16.4172	16.5719		15.2222	14.1818	14.5751		-0.789516	-2.18275		-1.67423	-2.2974	-2.41732		-0.789516	-2.18275	-4.88829	-1.67423	-2.2974	-2.41732		0.490537	0.109723	0.0751546
P69905	Hemoglobin subunit alpha OS=Homo sapiens OX=9606 GN=HBA1 PE=1 SV=2	[K].TYFPHFDLSHGSAQVK.[G]			100009	42907.6	71304.5		97523.6			16.6098	15.3889	16.1217		16.5735			-2.14487	-2.33138	-0.77473		-0.418939		-4.85269	-2.14487	-2.33138	-0.77473	-4.70459	-0.418939		1.14356	0.496165	0.633538
P04083	Annexin A1 OS=Homo sapiens OX=9606 GN=ANXA1 PE=1 SV=2	[K].TPAQFDADELR.[A]			103366	63180.2		11603.4	22849.5			16.6574	15.9472		13.5023	14.4799			-2.09725	-1.77314		-2.97691	-2.51252		-4.80093	-2.09725	-1.77314	-4.48144	-2.97691	-2.51252		-0.433188	-0.254184	0.350472
P07355	Annexin A2 OS=Homo sapiens OX=9606 GN=ANXA2 PE=1 SV=2	[K].TPAQYDASELK.[A]		35486.1	162927	53835.4	26070.9	27400.3	68963		15.115	17.3139	15.7163	14.6702	14.7419	16.0735		-2.09173	-1.44078	-2.00405	-2.22628	-1.73727	-0.918868		-2.09173	-1.44078	-2.00405	-2.22628	-1.73727	-0.918868		0.218049	-0.226677	0.443687
P46821	Microtubule-associated protein 1B OS=Homo sapiens OX=9606 GN=MAP1B PE=1 SV=2	[K].TPEDGDYSYEIIEK.[T]		2565122	1.20469e+06	1384154	4.97077e+06	2.71595e+06	2.42547e+06		21.2906	20.2002	20.4006	22.245	21.373	21.2098		4.08389	1.44559	2.68025	5.3486	4.89385	4.21743		4.08389	1.44559	2.68025	5.3486	4.89385	4.21743		2.08338	0.725278	2.16965
P46821	Microtubule-associated protein 1B OS=Homo sapiens OX=9606 GN=MAP1B PE=1 SV=2	[R].TPEEGGYSYDISEK.[T]		35353.6	138793	54762.1	53045.1	38974.1	79482.2		15.1096	17.0826	15.7409	15.6949	15.2502	16.2783		-2.09713	-1.67207	-1.97943	-1.2015	-1.22894	-0.714058		-2.09713	-1.67207	-1.97943	-1.2015	-1.22894	-0.714058		0.868042	0.725278	2.16965
P62263	40S ribosomal protein S14 OS=Homo sapiens OX=9606 GN=RPS14 PE=1 SV=3	[K].TPGPGAQSALR.[A]		977868	1.90313e+06	1.31613e+06	612758	520909	552082		19.8993	20.8599	20.3279	19.225	18.9907	19.0745		2.69258	2.1053	2.60755	2.32852	2.5115	2.08212		2.69258	2.1053	2.60755	2.32852	2.5115	2.08212		-0.161096	-0.540914	1.31712
TGME49_275470-t26_1-p1	transcript=TGME49_275470-t26_1 | gene=TGME49_275470 | organism=Toxoplasma_gondii_ME49 | gene_product=dense granule protein GRA15 | transcript_product=dense granule protein GRA15 | location=TGME49_chrX:7287059-7288711(+) | protein_length=550 | sequence_SO=chromosome | SO=protein_coding | is_pseudo=false	[R].TPIHVTASTSPFATR.[K]					484034	170886	226238					18.8847	17.3827	17.7875					1.98831	0.903504	0.795081		-4.94355	-5.27593	-4.69847	1.98831	0.903504	0.795081		6.20162	4.44009	12.9114
P06396	Gelsolin OS=Homo sapiens OX=9606 GN=GSN PE=1 SV=1	[K].TPSAAYLWVGTGASEAEK.[T]			1.02579e+06	450685			69101.9			19.9683	18.7818			16.0764			1.21367	1.06144			-0.915964		-4.96716	1.21367	1.06144	-4.68774	-4.73337	-0.915964		-2.54834	-2.34499	12.1468
P07355	Annexin A2 OS=Homo sapiens OX=9606 GN=ANXA2 PE=1 SV=2	[R].TNQELQEINR.[V]		45430.5	236563	79020.8	30187	53232	113484		15.4714	17.8519	16.2699	14.8816	15.7	16.7921		-1.73533	-0.902779	-1.45038	-2.0148	-0.779166	-0.200278		-1.73533	-0.902779	-1.45038	-2.0148	-0.779166	-0.200278		0.364748	-0.226677	0.443687
Q8WUM4	Programmed cell death 6-interacting protein OS=Homo sapiens OX=9606 GN=PDCD6IP PE=1 SV=1	[R].TPSNELYKPLR.[A]			11423.5	9822.73		16935.8	25300.6			13.4797	13.2619		14.0478	14.6269			-5.27493	-4.45841		-2.43138	-2.36552		-4.8119	-5.27493	-4.45841	-4.45814	-2.43138	-2.36552		1.7634	3.00135	4.21966
Q7Z7C8	Transcription initiation factor TFIID subunit 8 OS=Homo sapiens OX=9606 GN=TAF8 PE=1 SV=1	[K].TPTYREPVSDYQVLR.[E]			63109.7	22012						15.9456	14.426						-2.80907	-3.29432					-5.056	-2.80907	-3.29432	-4.62747	-4.74195	-4.44364		-0.88456	-0.88456	1.62621
P35580	Myosin-10 OS=Homo sapiens OX=9606 GN=MYH10 PE=1 SV=3 Myosin-9 OS=Homo sapiens OX=9606 GN=MYH9 PE=1 SV=4	[RK].TQLEELEDELQATEDAK.[L]				323082							18.3015							0.581219					-5.01616	-5.17657	0.581219	-4.5962	-4.81988	-4.5156		-1.44006	-1.95045	59.9637
TGME49_275470-t26_1-p1	transcript=TGME49_275470-t26_1 | gene=TGME49_275470 | organism=Toxoplasma_gondii_ME49 | gene_product=dense granule protein GRA15 | transcript_product=dense granule protein GRA15 | location=TGME49_chrX:7287059-7288711(+) | protein_length=550 | sequence_SO=chromosome | SO=protein_coding | is_pseudo=false	[R].TQPISSPHTLLSR.[S]					392316	185124	221141					18.5817	17.4981	17.7546					1.68522	1.01896	0.762206		-4.84166	-5.33529	-4.72647	1.68522	1.01896	0.762206		6.12327	4.44009	12.9114
P01040	Cystatin-A OS=Homo sapiens OX=9606 GN=CSTA PE=1 SV=1	[K].TQVVAGTNYYIK.[V]		128729	575658	260041	189994	501411	751169		16.974	19.1349	17.9884	17.5356	18.9356	19.5188		-0.232722	0.380207	0.268058	0.639156	2.45646	2.52638		-0.232722	0.380207	0.268058	0.639156	2.45646	2.52638		1.73548	2.21071	3.22083
P02533	Keratin, type I cytoskeletal 14 OS=Homo sapiens OX=9606 GN=KRT14 PE=1 SV=4 Keratin, type I cytoskeletal 13 OS=Homo sapiens OX=9606 GN=KRT13 PE=1 SV=4 Keratin, type I cytoskeletal 17 OS=Homo sapiens OX=9606 GN=KRT17 PE=1 SV=2 Keratin, type I cytoskeletal 16 OS=Homo sapiens OX=9606 GN=KRT16 PE=1 SV=4	[K].TRLEQEIATYR.[RS]			2154729	300104	90225.8	55592.4	248191			21.0391	18.1951	16.4613	15.7626	17.9211			2.28443	0.474783	-0.435184	-0.716573	0.928689		-4.93748	2.28443	0.474783	-0.435184	-0.716573	0.928689		0.651732	0.0182555	0.0639849
O43399	Tumor protein D54 OS=Homo sapiens OX=9606 GN=TPD52L2 PE=1 SV=2	[K].TSAALSTVGSAISR.[K]						7437.35							12.8606							-3.6186			-4.92943	-5.1358	-4.79111	-4.43989	-3.6186	-4.52966		0.756065	-0.310422	0.220165
O95425	Supervillin OS=Homo sapiens OX=9606 GN=SVIL PE=1 SV=2	[K].TPTGEGLLDSPSK.[T]			56959.8	33987.1						15.7977	15.0527						-2.95699	-2.66762					-4.85652	-2.95699	-2.66762	-4.68411	-4.7767	-4.589		-1.18956	-1.03429	2.2621
TGME49_270250-t26_1-p1	transcript=TGME49_270250-t26_1 | gene=TGME49_270250 | organism=Toxoplasma_gondii_ME49 | gene_product=dense granule protein GRA1 | transcript_product=dense granule protein GRA1 | location=TGME49_chrVIII:5310153-5310860(-) | protein_length=190 | sequence_SO=chromosome | SO=protein_coding | is_pseudo=false	[K].TSDGSYSEVGNVNMEEVIDTMK.[S]	2xOxidation [M14				1.93791e+06	779311	1.62558e+06					20.8861	19.5718	20.6325					3.98963	3.09267	3.64012		-4.78971	-5.16765	-4.90951	3.98963	3.09267	3.64012		8.52976	5.87075	10.4661
P46778	60S ribosomal protein L21 OS=Homo sapiens OX=9606 GN=RPL21 PE=1 SV=2	[R].TNGKEPELLEPIPYEFMA.[-]	1xOxidation [M17]		253860	120152			35768.1			17.9537	16.8745			15.1264			-0.800971	-0.845815			-1.86602		-5.08639	-0.800971	-0.845815	-4.59055	-4.75828	-1.86602		-1.49389	-1.16581	1.66176
P08670	Vimentin OS=Homo sapiens OX=9606 GN=VIM PE=1 SV=4	[R].TNEKVELQELNDR.[F]		1.07294e+06	5.76066e+06	2.00569e+06	505287	420508	617631		20.0331	22.4578	20.9357	18.9467	18.6818	19.2364		2.82644	3.70316	3.21535	2.05031	2.2026	2.24398		2.82644	3.70316	3.21535	2.05031	2.2026	2.24398		-1.08268	-1.45396	18.1104
P35527	Keratin, type I cytoskeletal 9 OS=Homo sapiens OX=9606 GN=KRT9 PE=1 SV=3	[K].TLNDMRQEYEQLIAK.[N]	1xOxidation [M5]	354625	3.96731e+07	1.48379e+06	3.50595e+06	289555	8.5789e+06		18.4359	25.2417	20.5009	21.7414	18.1435	23.0324		1.22923	6.48701	2.78054	4.84494	1.6643	6.03996		1.22923	6.48701	2.78054	4.84494	1.6643	6.03996		0.684139	-0.363396	2.17627
P12814	Alpha-actinin-1 OS=Homo sapiens OX=9606 GN=ACTN1 PE=1 SV=2 Alpha-actinin-4 OS=Homo sapiens OX=9606 GN=ACTN4 PE=1 SV=2	[R].TINEVENQILTR.[D]			270142	132827			34264.1			18.0434	17.0192			15.0644			-0.711289	-0.701134			-1.92799		-5.08013	-0.711289	-0.701134	-4.67722	-4.69231	-1.92799		-1.60165	-0.895474	0.661712
P07477	Trypsin-1 OS=Homo sapiens OX=9606 GN=PRSS1 PE=1 SV=1	[K].TLNNDIMLIK.[L]			2.53469e+07	2.56278e+07	4.97023e+06		16891848			24.5953	24.6112	22.2449		24.0098			5.84066	6.89089	5.34844		7.01742		-4.80273	5.84066	6.89089	5.34844	-4.88152	7.01742		-0.14816	0.730683	0.782181
P07477	Trypsin-1 OS=Homo sapiens OX=9606 GN=PRSS1 PE=1 SV=1	[K].TLNNDIMLIK.[L]	1xOxidation [M7]	7.98123e+07	7.42259e+07	6.10166e+07	1.02041e+08	7.5087e+07	6.44768e+07		26.2501	26.1454	25.8627	26.6046	26.1621	25.9423		9.04341	7.39077	8.14238	9.70814	9.68289	8.94988		9.04341	7.39077	8.14238	9.70814	9.68289	8.94988		1.25478	0.730683	0.782181
P28289	Tropomodulin-1 OS=Homo sapiens OX=9606 GN=TMOD1 PE=1 SV=1	[K].TLNVESNFISGAGILR.[L]			144318	43097.7						17.1389	15.3953						-1.61575	-2.325					-5.01199	-1.61575	-2.325	-4.69887	-4.68266	-4.66394		-1.69758	-1.6954	1.89085
P62979	Ubiquitin-40S ribosomal protein S27a OS=Homo sapiens OX=9606 GN=RPS27A PE=1 SV=2	[K].TITLEVEPSDTIENVK.[A]		1579649	3735543	1.17352e+06	574376	451972	1.74287e+06		20.5912	21.8329	20.1624	19.1316	18.7859	20.733		3.38447	3.07824	2.44209	2.2352	2.3067	3.74063		3.38447	3.07824	2.44209	2.2352	2.3067	3.74063		-0.207425	-0.073528	0.140305
P62979	Ubiquitin-40S ribosomal protein S27a OS=Homo sapiens OX=9606 GN=RPS27A PE=1 SV=2	[K].TITLEVEPSDTIENVKAK.[I]		204237	197518	75979.2	126293	102148	235454		17.6399	17.5916	16.2133	16.9464	16.6403	17.8451		0.433183	-1.16302	-1.507	0.0499832	0.161126	0.852685		0.433183	-1.16302	-1.507	0.0499832	0.161126	0.852685		1.10021	-0.073528	0.140305
P01040	Cystatin-A OS=Homo sapiens OX=9606 GN=CSTA PE=1 SV=1	[K].TNETYGKLEAVQYK.[T]			221447	63960.6	35411.9	143365	223666			17.7566	15.9649	15.1119	17.1293	17.771			-0.998044	-1.75543	-1.78449	0.650158	0.778587		-4.80926	-0.998044	-1.75543	-1.78449	0.650158	0.778587		2.40233	2.21071	3.22083
P29508	Serpin B3 OS=Homo sapiens OX=9606 GN=SERPINB3 PE=1 SV=2	[R].TMGMVDIFNGDADLSGMTGSR.[G]	3xOxidation [M2		82942.5				94434			16.3398				16.527			-2.41482				-0.465383		-5.02169	-2.41482	-4.95559	-4.42394	-4.81984	-0.465383		0.89431	0.983388	1.37421
P15924	Desmoplakin OS=Homo sapiens OX=9606 GN=DSP PE=1 SV=3	[R].TMIQSPSGVILQEAADVHAR.[Y]	1xOxidation [M2]		329902				47032.3			18.3317				15.5214			-0.422965				-1.47104		-4.93452	-0.422965	-4.7347	-4.6898	-4.67673	-1.47104		-0.248463	0.231076	0.904463
Q04695	Keratin, type I cytoskeletal 17 OS=Homo sapiens OX=9606 GN=KRT17 PE=1 SV=2	[R].TMQALEIELQSQLSMK.[A]	2xOxidation [M2		115885							16.8223							-1.93232						-4.94064	-1.93232	-4.8874	-4.64452	-4.80867	-4.40215		-0.698331	-0.144984	0.288677
Q8WUM4	Programmed cell death 6-interacting protein OS=Homo sapiens OX=9606 GN=PDCD6IP PE=1 SV=1	[K].TMQGSEVVNVLK.[S]	1xOxidation [M2]				78340.8	49863.8	32319.1					16.2575	15.6057	14.9801					-0.638961	-0.873468	-2.0123		-4.79809	-5.27583	-4.90683	-0.638961	-0.873468	-2.0123		3.81868	3.00135	4.21966
P02533	Keratin, type I cytoskeletal 14 OS=Homo sapiens OX=9606 GN=KRT14 PE=1 SV=4	[R].TMQNLEIELQSQLSMK.[A]	2xOxidation [M2		627967	50842.7	27859.7	12317.2	40501			19.2603	15.6338	14.7659	13.5884	15.3057			0.505684	-2.08657	-2.13054	-2.89078	-1.68673		-5.00893	0.505684	-2.08657	-2.13054	-2.89078	-1.68673		-0.039413	0.0182555	0.0639849
P04264	Keratin, type II cytoskeletal 1 OS=Homo sapiens OX=9606 GN=KRT1 PE=1 SV=6	[R].TNAENEFVTIK.[K]		4.32406e+06	5.69719e+07	8291764	4244258	4.19681e+06	1.01903e+07		22.044	25.7637	22.9832	22.0171	22.0009	23.2807		4.83725	7.0091	5.26293	5.12064	5.52169	6.2883		4.83725	7.0091	5.26293	5.12064	5.52169	6.2883		-0.0595502	-0.0837483	0.431184
P04264	Keratin, type II cytoskeletal 1 OS=Homo sapiens OX=9606 GN=KRT1 PE=1 SV=6	[R].TNAENEFVTIKK.[D]		1.90564e+06	3.05112e+07	2.22468e+06	2.02682e+06	3.6446e+06	4.36998e+06		20.8618	24.8628	21.0852	20.9508	21.7973	22.0592		3.65514	6.10819	3.36484	4.05435	5.31816	5.06679		3.65514	6.10819	3.36484	4.05435	5.31816	5.06679		0.43704	-0.0837483	0.431184
P00441	Superoxide dismutase [Cu-Zn] OS=Homo sapiens OX=9606 GN=SOD1 PE=1 SV=2	[R].TLVVHEKADDLGKGGNEESTK.[T]																							-5.07862	-5.37245	-4.86578	-4.67337	-4.85037	-4.54124		0.417293	0.417293	3.54376
C9J7I0	UBAP1-MVB12-associated (UMA)-domain containing protein 1 OS=Homo sapiens OX=9606 GN=UMAD1 PE=2 SV=2	[K].TSDIEANQPLETNK.[E]					91016.4	89542.3	137375					16.4738	16.4503	17.0678					-0.422597	-0.0288907	0.0753566		-4.80954	-5.33057	-4.86497	-0.422597	-0.0288907	0.0753566		4.87632	4.68678	13.4573
C9J7I0	UBAP1-MVB12-associated (UMA)-domain containing protein 1 OS=Homo sapiens OX=9606 GN=UMAD1 PE=2 SV=2	[K].TSDIEANQPLETNKENSSSVTVSDPEMENK.[A]					281968		418921					18.1052		18.6763					1.20873		1.68392		-4.96427	-5.29169	-4.78413	1.20873	-4.89678	1.68392		4.34532	4.68678	13.4573
C9J7I0	UBAP1-MVB12-associated (UMA)-domain containing protein 1 OS=Homo sapiens OX=9606 GN=UMAD1 PE=2 SV=2	[K].TSDIEANQPLETNKENSSSVTVSDPEMENK.[A]	1xOxidation [M27]				1.07521e+06	918629	835566					20.0362	19.8091	19.6724					3.13976	3.32995	2.67999		-4.9978	-5.1554	-4.95125	3.13976	3.32995	2.67999		8.08472	4.68678	13.4573
TGME49_208830-t26_1-p1	transcript=TGME49_208830-t26_1 | gene=TGME49_208830 | organism=Toxoplasma_gondii_ME49 | gene_product=hypothetical protein | transcript_product=hypothetical protein | location=TGME49_chrIb:888562-890079(-) | protein_length=505 | sequence_SO=chromosome | SO=protein_coding | is_pseudo=false	[R].TTSPGSLGGFGATGGR.[V]					96482.4	28933.1	31097					16.558	14.8204	14.9245					-0.338458	-1.65874	-2.06791		-5.07034	-5.30665	-4.71122	-0.338458	-1.65874	-2.06791		3.67437	3.67437	6.29443
Q05682	Caldesmon OS=Homo sapiens OX=9606 GN=CALD1 PE=1 SV=3	[K].TTTTNTQVEGDDEAAFLER.[L]			135614	42248			43682.6			17.0492	15.3666			15.4148			-1.70549	-2.35372			-1.57763		-4.987	-1.70549	-2.35372	-4.68919	-4.62124	-1.57763		-0.613947	-0.394802	0.713066
TGME49_300100-t26_1-p1	transcript=TGME49_300100-t26_1 | gene=TGME49_300100 | organism=Toxoplasma_gondii_ME49 | gene_product=rhoptry neck protein RON2 | transcript_product=rhoptry neck protein RON2 | location=TGME49_chrXII:214746-225245(-) | protein_length=1479 | sequence_SO=chromosome | SO=protein_coding | is_pseudo=false	[K].TVDEELPEDLK.[V]		37408.4	27591.4	50850.9	27005.4	11378.6			15.1911	14.7519	15.634	14.721	13.474			-2.01563	-4.00272	-2.08634	-2.17547	-3.00514			-2.01563	-4.00272	-2.08634	-2.17547	-3.00514	-4.68636		-0.587431	0.423899	0.305096
Q5JTB6	Placenta-specific protein 9 OS=Homo sapiens OX=9606 GN=PLAC9 PE=1 SV=1	[K].TVDHLGTEVK.[G]		150613					14518.9		17.2005					13.8256		-0.00621241					-3.16676		-0.00621241	-5.41337	-4.94044	-4.66517	-4.75087	-3.16676		-0.740928	-0.740928	0.482523
TGME49_229480-t26_1-p1	transcript=TGME49_229480-t26_1 | gene=TGME49_229480 | organism=Toxoplasma_gondii_ME49 | gene_product=calcium binding protein precursor, putative | transcript_product=calcium binding protein precursor, putative | location=TGME49_chrVIII:292754-295302(-) | protein_length=335 | sequence_SO=chromosome | SO=protein_coding | is_pseudo=false	[K].TVDKDNDGLLDLSEIR.[I]					1.7208e+06	97182.1	1.41527e+06					20.7146	16.5684	20.4326					3.81821	0.0892298	3.44024		-5.08052	-5.41449	-4.73859	3.81821	0.0892298	3.44024		7.52709	4.48727	20.0107
P08670	Vimentin OS=Homo sapiens OX=9606 GN=VIM PE=1 SV=4	[K].TVETRDGQVINETSQHHDDLE.[-]		60942.5	470922	146367	20106.9		59909.1		15.8952	18.8451	17.1592	14.2954		15.8705		-1.31154	0.0904822	-0.56109	-2.60104		-1.12191		-1.31154	0.0904822	-0.56109	-2.60104	-4.62241	-1.12191		-2.18774	-1.45396	18.1104
P11142	Heat shock cognate 71 kDa protein OS=Homo sapiens OX=9606 GN=HSPA8 PE=1 SV=1 Heat shock 70 kDa protein 1B OS=Homo sapiens OX=9606 GN=HSPA1B PE=1 SV=1	[R].TTPSYVAFTDTER.[L]		141960	1.33596e+06	567956	167810	86964.5	228682		17.1151	20.3494	19.1154	17.3565	16.4081	17.803		-0.0915781	1.5948	1.3951	0.460031	-0.0710332	0.810581		-0.0915781	1.5948	1.3951	0.460031	-0.0710332	0.810581		-0.566248	-0.279499	0.522606
P35579	Myosin-9 OS=Homo sapiens OX=9606 GN=MYH9 PE=1 SV=4	[R].TVGQLYKEQLAK.[L]		76910.9	1.38866e+06	447291	53505.8	47800.1	126930		16.2309	20.4053	18.7709	15.7074	15.5447	16.9537		-0.975802	1.65062	1.05053	-1.18903	-0.934446	-0.038725		-0.975802	1.65062	1.05053	-1.18903	-0.934446	-0.038725		-1.29585	-1.7311	75.0609
P62805	Histone H4 OS=Homo sapiens OX=9606 GN=HIST1H4A PE=1 SV=2	[K].TVTAMDVVYALK.[R]			328119	74328			46019			18.3239	16.1816			15.4899			-0.430785	-1.5387			-1.50246		-5.02892	-0.430785	-1.5387	-4.47847	-4.8705	-1.50246		-1.28434	-1.9663	8.7918
P62805	Histone H4 OS=Homo sapiens OX=9606 GN=HIST1H4A PE=1 SV=2	[K].TVTAMDVVYALK.[R]	1xOxidation [M5]	4343078	3.51895e+06	995867	127161	158778	563658		22.0503	21.7467	19.9256	16.9563	17.2766	19.1045		4.84358	2.99207	2.20527	0.0598662	0.797477	2.11206		4.84358	2.99207	2.20527	0.0598662	0.797477	2.11206		-2.35717	-1.9663	8.7918
P62805	Histone H4 OS=Homo sapiens OX=9606 GN=HIST1H4A PE=1 SV=2	[K].TVTAMDVVYALKR.[Q]	1xOxidation [M5]	3.79425e+06	3.82664e+06	680867	100744	59672.3	597399		21.8554	21.8676	19.377	16.6203	15.8648	19.1883		4.64868	3.113	1.65669	-0.276101	-0.614399	2.19593		4.64868	3.113	1.65669	-0.276101	-0.614399	2.19593		-2.70431	-1.9663	8.7918
TGME49_258870-t26_1-p1	transcript=TGME49_258870-t26_1 | gene=TGME49_258870 | organism=Toxoplasma_gondii_ME49 | gene_product=hypothetical protein | transcript_product=hypothetical protein | location=TGME49_chrVIIb:3113941-3118623(-) | protein_length=916 | sequence_SO=chromosome | SO=protein_coding | is_pseudo=false	[R].TVVAEVVEDDSKDSR.[A]					134040	40659.5	60101.3					17.0323	15.3113	15.8751					0.135869	-1.16787	-1.11729		-4.86626	-5.31058	-4.8651	0.135869	-1.16787	-1.11729		4.29755	2.83067	4.01774
P11021	Endoplasmic reticulum chaperone BiP OS=Homo sapiens OX=9606 GN=HSPA5 PE=1 SV=2	[R].TWNDPSVQQDIK.[F]			196493	66321.2	27921.5		36876.3			17.5841	16.0172	14.7691		15.1704			-1.17052	-1.70314	-2.12735		-1.82199		-5.05375	-1.17052	-1.70314	-2.12735	-4.8208	-1.82199		-0.280911	-0.218298	0.708121
O75340	Programmed cell death protein 6 OS=Homo sapiens OX=9606 GN=PDCD6 PE=1 SV=1	[R].TYDRDNSGMIDKNELK.[Q]					374882		451493					18.5161		18.7843					1.61964		1.79194		-4.89546	-5.36766	-4.75857	1.61964	-4.70451	1.79194		4.57625	5.79024	17.3889
O75340	Programmed cell death protein 6 OS=Homo sapiens OX=9606 GN=PDCD6 PE=1 SV=1	[R].TYDRDNSGMIDKNELK.[Q]	1xOxidation [M9]				1.89994e+06	1.04778e+06	952501					20.8575	19.9989	19.8614					3.96108	3.51973	2.86896		-5.00774	-5.26659	-4.86874	3.96108	3.51973	2.86896		8.49761	5.79024	17.3889
Q9BXX0	EMILIN-2 OS=Homo sapiens OX=9606 GN=EMILIN2 PE=1 SV=3	[R].TVLDLQSSLAGVSENLK.[H]			143405	118649	20737.5		30005			17.1297	16.8563	14.34		14.8729			-1.6249	-0.863981	-2.55648		-2.11949		-5.07295	-1.6249	-0.863981	-2.55648	-4.78703	-2.11949		-0.633724	-0.633724	0.505139
P38646	Stress-70 protein, mitochondrial OS=Homo sapiens OX=9606 GN=HSPA9 PE=1 SV=2	[R].TTPSVVAFTADGER.[L]			96785.1				29567.2			16.5625				14.8517			-2.19215				-2.14069		-5.00044	-2.19215	-4.78121	-4.63337	-4.65243	-2.14069		0.182433	-0.0042376	0.00386071
TGME49_230705-t26_1-p1	transcript=TGME49_230705-t26_1 | gene=TGME49_230705 | organism=Toxoplasma_gondii_ME49 | gene_product=hypothetical protein | transcript_product=hypothetical protein | location=TGME49_chrVIII:990431-991782(-) | protein_length=266 | sequence_SO=chromosome | SO=protein_coding | is_pseudo=false	[K].TTPDEGFVNSFPESR.[E]					85225.9		36882.2					16.379		15.1706					-0.517432		-1.82177		-5.02132	-5.28816	-4.75622	-0.517432	-4.69215	-1.82177		2.67812	3.40572	8.14165
P46821	Microtubule-associated protein 1B OS=Homo sapiens OX=9606 GN=MAP1B PE=1 SV=2	[R].TSDVGGYYYEK.[I]			28480.4	13023.6	9511.76	10974.5	21924.9			14.7977	13.6688	13.2155	13.4219	14.4203			-3.95697	-4.05148	-3.68094	-3.0573	-2.57212		-4.99247	-3.95697	-4.05148	-3.68094	-3.0573	-2.57212		1.23019	0.725278	2.16965
P46821	Microtubule-associated protein 1B OS=Homo sapiens OX=9606 GN=MAP1B PE=1 SV=2	[R].TSDVGGYYYEKIER.[T]							33250.4							15.0211							-1.97132		-5.02488	-5.26581	-4.78353	-4.61013	-4.69468	-1.97132		1.26603	0.725278	2.16965
P37108	Signal recognition particle 14 kDa protein OS=Homo sapiens OX=9606 GN=SRP14 PE=1 SV=2	[R].TSGSVYITLK.[K]		151798	675833	449580	207859	88603.5	150973		17.2118	19.3663	18.7782	17.6652	16.4351	17.2039		0.00509182	0.611662	1.0579	0.76881	-0.0440963	0.211526		0.00509182	0.611662	1.0579	0.76881	-0.0440963	0.211526		-0.246137	-0.327231	0.52098
TGME49_204020-t26_1-p1	transcript=TGME49_204020-t26_1 | gene=TGME49_204020 | organism=Toxoplasma_gondii_ME49 | gene_product=ribosomal protein RPL8 | transcript_product=ribosomal protein RPL8 | location=TGME49_chrVIIa:2046086-2048555(+) | protein_length=260 | sequence_SO=chromosome | SO=protein_coding | is_pseudo=false	[R].TSGTYATIVGHSDDGSK.[T]			34876.8	25506.9		19457.6	29863.8			15.09	14.6386		14.248	14.8661			-3.66467	-3.08172		-2.23113	-2.12629		-4.88618	-3.66467	-3.08172	-4.4276	-2.23113	-2.12629		0.949184	0.37666	0.269561
P35908	Keratin, type II cytoskeletal 2 epidermal OS=Homo sapiens OX=9606 GN=KRT2 PE=1 SV=2	[R].TSQNSELNNMQDLVEDYK.[K]			66137							16.0132							-2.74148						-4.78791	-2.74148	-4.67064	-4.56303	-4.78177	-4.56935		-0.571375	0.181252	0.903762
P35908	Keratin, type II cytoskeletal 2 epidermal OS=Homo sapiens OX=9606 GN=KRT2 PE=1 SV=2	[R].TSQNSELNNMQDLVEDYK.[K]	1xOxidation [M10]		1.06504e+06		20370.3	10040.4	106422			20.0225		14.3142	13.2935	16.6994			1.26783		-2.58226	-3.18565	-0.29297		-5.03799	1.26783	-4.95869	-2.58226	-3.18565	-0.29297		0.889323	0.181252	0.903762
P35908	Keratin, type II cytoskeletal 2 epidermal OS=Homo sapiens OX=9606 GN=KRT2 PE=1 SV=2	[R].TSQNSELNNMQDLVEDYKK.[K]	1xOxidation [M10]	90759.4	9.45292e+06	86992.5	327365	157241	1.04126e+06		16.4698	23.1723	16.4086	18.3205	17.2626	19.9899		-0.736944	4.41768	-1.31172	1.42411	0.783444	2.9975		-0.736944	4.41768	-1.31172	1.42411	0.783444	2.9975		0.945342	0.181252	0.903762
P61247	40S ribosomal protein S3a OS=Homo sapiens OX=9606 GN=RPS3A PE=1 SV=2	[K].TSYAQHQQVR.[Q]		314549	1.42006e+06	456045			128586		18.2629	20.4375	18.7988			16.9724		1.05622	1.68287	1.0785			-0.020032		1.05622	1.68287	1.0785	-4.68261	-4.7389	-0.020032		-4.41971	-0.976845	5.34325
P13647	Keratin, type II cytoskeletal 5 OS=Homo sapiens OX=9606 GN=KRT5 PE=1 SV=3	[R].TTAENEFVMLK.[K]	1xOxidation [M9]	30706.4	676330	98475.5	37754.6	46124.6	122678		14.9063	19.3674	16.5875	15.2044	15.4932	16.9045		-2.30045	0.612724	-1.13284	-1.69207	-0.985924	-0.0878822		-2.30045	0.612724	-1.13284	-1.69207	-0.985924	-0.0878822		0.0182318	0.091607	0.259862
P13647	Keratin, type II cytoskeletal 5 OS=Homo sapiens OX=9606 GN=KRT5 PE=1 SV=3	[R].TTAENEFVMLKK.[D]			646481		62879.6		121363			19.3022		15.9403		16.889			0.547603		-0.956132		-0.103436		-5.02106	0.547603	-4.85489	-0.956132	-4.64765	-0.103436		1.20704	0.091607	0.259862
P13647	Keratin, type II cytoskeletal 5 OS=Homo sapiens OX=9606 GN=KRT5 PE=1 SV=3	[R].TTAENEFVMLKK.[D]	1xOxidation [M9]	53075.2	1.16893e+06	90151.9	54146	159639	221251		15.6958	20.1568	16.4601	15.7246	17.2845	17.7553		-1.51095	1.40212	-1.26025	-1.17187	0.805278	0.76292		-1.51095	1.40212	-1.26025	-1.17187	0.805278	0.76292		0.588472	0.091607	0.259862
P62847	40S ribosomal protein S24 OS=Homo sapiens OX=9606 GN=RPS24 PE=1 SV=1	[K].TTGFGMIYDSLDYAK.[K]	1xOxidation [M6]	50592.7	5923918	2.0207e+06	274515	23797.2	537966		15.6266	22.4981	20.9464	18.0665	14.5385	19.0372		-1.58006	3.74347	3.2261	1.17009	-1.94067	2.04475		-1.58006	3.74347	3.2261	1.17009	-1.94067	2.04475		-1.37178	-1.50999	4.38185
P62847	40S ribosomal protein S24 OS=Homo sapiens OX=9606 GN=RPS24 PE=1 SV=1	[K].TTGFGMIYDSLDYAKK.[N]	1xOxidation [M6]		211981				45779.4			17.6936				15.4824			-1.06107				-1.50999		-4.92977	-1.06107	-4.80373	-4.54698	-4.78893	-1.50999		-0.017111	-1.50999	4.38185
P60709	Actin, cytoplasmic 1 OS=Homo sapiens OX=9606 GN=ACTB PE=1 SV=1	[R].TTGIVMDSGDGVTHTVPIYEGYALPHAILR.[L]	1xOxidation [M6]		761342	129167						19.5382	16.9789						0.783541	-0.741439					-5.02488	0.783541	-0.741439	-4.62939	-4.72084	-4.53555		-2.96767	-1.70874	12.7917
P46821	Microtubule-associated protein 1B OS=Homo sapiens OX=9606 GN=MAP1B PE=1 SV=2	[K].TTKTPEDGDYSYEIIEK.[T]			66128.1				35392			16.013				15.1111			-2.74167				-1.88126		-5.04363	-2.74167	-4.9226	-4.42043	-4.89257	-1.88126		0.504544	0.725278	2.16965
P35580	Myosin-10 OS=Homo sapiens OX=9606 GN=MYH10 PE=1 SV=3	[K].TTLQVDTLNAELAAER.[S]			1.49264e+06	563508	31195.8		132094			20.5094	19.1041	14.9291		17.0112			1.75479	1.38376	-1.96737		0.0187979		-4.8872	1.75479	1.38376	-1.96737	-4.81972	0.0187979		-1.67321	-1.95045	59.9637
Q14257	Reticulocalbin-2 OS=Homo sapiens OX=9606 GN=RCN2 PE=1 SV=1	[R].VIDFDENTALDDAEEESFR.[K]			66842.7							16.0285							-2.72616						-5.08024	-2.72616	-4.87909	-4.50316	-4.81741	-4.52566		-0.386912	-0.491472	0.626815
P37802	Transgelin-2 OS=Homo sapiens OX=9606 GN=TAGLN2 PE=1 SV=3	[R].TLMNLGGLAVAR.[D]	1xOxidation [M3]	215603	347298	134244	205257	158386	221597		17.718	18.4058	17.0345	17.6471	17.2731	17.7576		0.511317	-0.34883	-0.685825	0.750638	0.79391	0.765178		0.511317	-0.34883	-0.685825	0.750638	0.79391	0.765178		0.944355	-0.404367	0.504125
P60660	Myosin light polypeptide 6 OS=Homo sapiens OX=9606 GN=MYL6 PE=1 SV=2	[K].VLDFEHFLPMLQTVAK.[N]	1xOxidation [M10]		1.43451e+07	4.93576e+06	437199	41858.7	1.89075e+06			23.7741	22.2348	18.7379	15.3532	20.8505			5.01941	4.51452	1.84149	-1.12593	3.85813		-4.97303	5.01941	4.51452	1.84149	-1.12593	3.85813		0.0042631	-0.835341	2.76722
P06702	Protein S100-A9 OS=Homo sapiens OX=9606 GN=S100A9 PE=1 SV=1	[K].VIEHIMEDLDTNADK.[Q]	1xOxidation [M6]		158556			166749	366561			17.2746			17.3473	18.4837			-1.48001			0.868144	1.49129		-4.89673	-1.48001	-4.89244	-4.45119	0.868144	1.49129		3.05914	2.11927	5.16912
P04264	Keratin, type II cytoskeletal 1 OS=Homo sapiens OX=9606 GN=KRT1 PE=1 SV=6	[K].WELLQQVDTSTR.[T]		288939	4.79573e+07	3.08823e+06	1051795	362095	2.7914e+06		18.1404	25.5152	21.5584	20.0044	18.466	21.4126		0.9337	6.7606	3.83803	3.10799	1.98684	4.42016		0.9337	6.7606	3.83803	3.10799	1.98684	4.42016		-0.672451	-0.0837483	0.431184
Q8WWI1	LIM domain only protein 7 OS=Homo sapiens OX=9606 GN=LMO7 PE=1 SV=3	[K].WIDATSGIYNSEK.[S]			130464	55606.1						16.9933	15.763						-1.76135	-1.95737					-4.94976	-1.76135	-1.95737	-4.51105	-4.71412	-4.69617		-1.75095	-1.67673	4.00167
P09234	U1 small nuclear ribonucleoprotein C OS=Homo sapiens OX=9606 GN=SNRPC PE=1 SV=1	[K].WMEEQAQSLIDK.[T]	1xOxidation [M2]						41431.2							15.3384							-1.65397		-4.911	-5.12455	-4.89797	-4.41998	-4.8152	-1.65397		1.34812	1.34812	1.70013
P61247	40S ribosomal protein S3a OS=Homo sapiens OX=9606 GN=RPS3A PE=1 SV=2	[K].WQTMIEAHVDVK.[T]	1xOxidation [M4]		504306	283868			26913.9			18.9439	18.1149			14.7161			0.189296	0.39454			-2.27634		-4.79213	0.189296	0.39454	-4.45519	-4.67069	-2.27634		-2.39797	-0.976845	5.34325
P04259	Keratin, type II cytoskeletal 6B OS=Homo sapiens OX=9606 GN=KRT6B PE=1 SV=5 Keratin, type II cytoskeletal 6A OS=Homo sapiens OX=9606 GN=KRT6A PE=1 SV=3 Keratin, type II cytoskeletal 5 OS=Homo sapiens OX=9606 GN=KRT5 PE=1 SV=3	[K].WTLLQEQGTK.[T]		153269	5.39351e+06	437813	219729	438041	552728		17.2257	22.3628	18.74	17.7454	18.7407	19.0762		0.0190028	3.60815	1.01963	0.848931	2.26153	2.08381		0.0190028	3.60815	1.01963	0.848931	2.26153	2.08381		0.182496	0.27429	0.873474
P35580	Myosin-10 OS=Homo sapiens OX=9606 GN=MYH10 PE=1 SV=3 Myosin-9 OS=Homo sapiens OX=9606 GN=MYH9 PE=1 SV=4	[RK].YAEERDRAEAEAR.[E]			1.60556e+06	457892						20.6146	18.8046						1.86	1.08433					-5.04676	1.86	1.08433	-4.57691	-4.78761	-4.45783		-3.90664	-1.95045	59.9637
P23528	Cofilin-1 OS=Homo sapiens OX=9606 GN=CFL1 PE=1 SV=3	[R].YALYDATYETK.[E]		118588	381668	326709	77155.6	42018.6	197459		16.8556	18.542	18.3176	16.2355	15.3587	17.5912		-0.35111	-0.212688	0.597327	-0.660953	-1.12043	0.598794		-0.35111	-0.212688	0.597327	-0.660953	-1.12043	0.598794		-0.405373	-0.119042	0.0816903
TGME49_239740-t26_1-p1	transcript=TGME49_239740-t26_1 | gene=TGME49_239740 | organism=Toxoplasma_gondii_ME49 | gene_product=dense granule protein GRA14 | transcript_product=dense granule protein GRA14 | location=TGME49_chrVI:883160-884386(-) | protein_length=408 | sequence_SO=chromosome | SO=protein_coding | is_pseudo=false	[R].WAGTYGTSHGGYR.[V]					2.55322e+06	536797	1.73421e+06					21.2839	19.034	20.7258					4.38745	2.55484	3.73345		-4.92496	-5.34669	-4.69908	4.38745	2.55484	3.73345		8.54882	5.93448	38.4972
P48047	ATP synthase subunit O, mitochondrial OS=Homo sapiens OX=9606 GN=ATP5PO PE=1 SV=1	[R].YATALYSAASK.[Q]		44721.2	116947	48744.7	26435.3	14875.6	13882.8		15.4487	16.8355	15.573	14.6902	13.8607	13.761		-1.75803	-1.91915	-2.14736	-2.20626	-2.61851	-3.2314		-1.75803	-1.91915	-2.14736	-2.20626	-2.61851	-3.2314		-0.743872	-0.9647	1.34484
Q9UK41	Vacuolar protein sorting-associated protein 28 homolog OS=Homo sapiens OX=9606 GN=VPS28 PE=1 SV=1	[K].YDNMAELFAVVK.[T]	1xOxidation [M4]	3.10273e+06			183812		106521		21.5651			17.4879		16.7008		4.3584			0.591439		-0.291626		4.3584	-5.34995	-4.75412	0.591439	-4.64025	-0.291626		0.468412	3.35944	5.79407
P04264	Keratin, type II cytoskeletal 1 OS=Homo sapiens OX=9606 GN=KRT1 PE=1 SV=6 Keratin, type II cytoskeletal 6B OS=Homo sapiens OX=9606 GN=KRT6B PE=1 SV=5	[K].YEELQITAGR.[H]		805060	2.86479e+07	2.93717e+06	856197	1.61285e+06	2.97972e+06		19.6187	24.7719	21.486	19.7076	20.6212	21.5067		2.41203	6.01728	3.76568	2.81115	4.142	4.51434		2.41203	6.01728	3.76568	2.81115	4.142	4.51434		-0.242498	-0.0837483	0.431184
P13647	Keratin, type II cytoskeletal 5 OS=Homo sapiens OX=9606 GN=KRT5 PE=1 SV=3	[K].YEELQQTAGR.[H]		37160.4	1.1541e+06	149523	38582.3	84280.9	147634		15.1815	20.1383	17.19	15.2357	16.3629	17.1717		-2.02522	1.3837	-0.530312	-1.66078	-0.116254	0.179263		-2.02522	1.3837	-0.530312	-1.66078	-0.116254	0.179263		-0.141979	0.091607	0.259862
P02538	Keratin, type II cytoskeletal 6A OS=Homo sapiens OX=9606 GN=KRT6A PE=1 SV=3 Keratin, type II cytoskeletal 75 OS=Homo sapiens OX=9606 GN=KRT75 PE=1 SV=2	[K].YEELQVTAGR.[H]		20985.5	575326	51284.1	72766.7	198396	105127		14.3571	19.134	15.6462	16.151	17.598	16.6818		-2.8496	0.379375	-2.0741	-0.745446	1.11885	-0.310625		-2.8496	0.379375	-2.0741	-0.745446	1.11885	-0.310625		1.5357	1.01881	1.97096
P35908	Keratin, type II cytoskeletal 2 epidermal OS=Homo sapiens OX=9606 GN=KRT2 PE=1 SV=2	[K].YEELQVTVGR.[H]		30233.3	1.59717e+06	78043.5	32100.2	43774.4	163716		14.8838	20.6071	16.252	14.9703	15.4178	17.3208		-2.32285	1.85244	-1.46833	-1.92614	-1.06137	0.328434		-2.32285	1.85244	-1.46833	-1.92614	-1.06137	0.328434		-0.240112	0.181252	0.903762
O00488	Zinc finger protein 593 OS=Homo sapiens OX=9606 GN=ZNF593 PE=1 SV=2	[R].YFIDSTNLK.[T]		147058	479901	279861	174814	76435.4	104132		17.166	18.8724	18.0944	17.4155	16.222	16.6681		-0.0406764	0.117732	0.37403	0.519024	-0.25722	-0.324352		-0.0406764	0.117732	0.37403	0.519024	-0.25722	-0.324352		-0.171211	-0.6042	1.05772
P15924	Desmoplakin OS=Homo sapiens OX=9606 GN=DSP PE=1 SV=3	[K].YGDGIQLTR.[S]			76357.8			14593.1	22801.3			16.2205			13.833	14.4768			-2.53416			-2.64617	-2.51557		-4.86194	-2.53416	-4.77714	-4.43507	-2.64617	-2.51557		0.858807	0.231076	0.904463
P62913	60S ribosomal protein L11 OS=Homo sapiens OX=9606 GN=RPL11 PE=1 SV=2	[K].YDGIILPGK.[-]		3.38002e+06	3.87096e+06	3.20291e+06	4.30316e+06	3.5574e+06	3.18529e+06		21.6886	21.8843	21.611	22.037	21.7624	21.603		4.4819	3.12962	3.89063	5.14053	5.28322	4.61059		4.4819	3.12962	3.89063	5.14053	5.28322	4.61059		1.1774	0.272122	0.267328
P16070	CD44 antigen OS=Homo sapiens OX=9606 GN=CD44 PE=1 SV=3	[R].YGFIEGHVVIPR.[I]			52747.2	18308.7			19408.1			15.6868	14.1602			14.2444			-3.06784	-3.56008			-2.74803		-5.04098	-3.06784	-3.56008	-4.52061	-4.86832	-2.74803		-0.156022	-0.732672	1.32979
Q29963	HLA class I histocompatibility antigen, Cw-6 alpha chain OS=Homo sapiens OX=9606 GN=HLA-C PE=1 SV=2	[K].WAAVVVPSGEEQR.[Y]			110148	36203.9	29623.1	16423.4	16892.2			16.7491	15.1439	14.8544	14.0035	14.0441			-2.00556	-2.57646	-2.042	-2.47571	-2.94833		-5.00493	-2.00556	-2.57646	-2.042	-2.47571	-2.94833		0.706973	-0.211383	0.147576
P46778	60S ribosomal protein L21 OS=Homo sapiens OX=9606 GN=RPL21 PE=1 SV=2	[R].VYNVTQHAVGIVVNK.[Q]		215302	1.53441e+06	689681	32082.4	200464	367208		17.716	20.5493	19.3956	14.9695	17.613	18.4862		0.509302	1.79461	1.67525	-1.92694	1.13381	1.49384		0.509302	1.79461	1.67525	-1.92694	1.13381	1.49384		-1.09282	-1.16581	1.66176
P10909	Clusterin OS=Homo sapiens OX=9606 GN=CLU PE=1 SV=1	[R].VTTVASHTSDSDVPSGVTEVVVK.[L]		135100	184948	81516.1	146293	64565.5	95337		17.0437	17.4968	16.3148	17.1585	15.9785	16.5407		-0.163039	-1.25788	-1.40552	0.262061	-0.500697	-0.451653		-0.163039	-1.25788	-1.40552	0.262061	-0.500697	-0.451653		0.712052	1.21566	2.42838
P02042	Hemoglobin subunit delta OS=Homo sapiens OX=9606 GN=HBD PE=1 SV=2	[K].VVAGVANALAHKYH.[-]							18719.9							14.1923							-2.80012		-4.84297	-5.29296	-4.95283	-4.46136	-4.6976	-2.80012		1.04323	1.04323	2.19274
P04406	Glyceraldehyde-3-phosphate dehydrogenase OS=Homo sapiens OX=9606 GN=GAPDH PE=1 SV=3	[R].VVDLMAHMASKE.[-]	1xOxidation [M]		92320	30278	9622.1		48417.5			16.4944	14.886	13.2321		15.5632			-2.26029	-2.83434	-3.6643		-1.42916		-5.04892	-2.26029	-2.83434	-3.6643	-4.80529	-1.42916		0.0816023	0.407759	0.592568
P04406	Glyceraldehyde-3-phosphate dehydrogenase OS=Homo sapiens OX=9606 GN=GAPDH PE=1 SV=3	[R].VVDLMAHMASKE.[-]	2xOxidation [M5	54479.3	153842		46044.5	83591.4	84660.6		15.7334	17.2311		15.4907	16.3511	16.3694		-1.47328	-1.52356		-1.40569	-0.128105	-0.622999		-1.47328	-1.52356	-4.67683	-1.40569	-0.128105	-0.622999		1.83896	0.407759	0.592568
E9PRG8	Uncharacterized protein C11orf98 OS=Homo sapiens OX=9606 GN=C11orf98 PE=4 SV=2	[R].VVGAVIDQGLITR.[H]		362294	2.52043e+06	669973	570425	124752	294838		18.4668	21.2652	19.3537	19.1217	16.9287	18.1696		1.2601	2.51059	1.63342	2.22524	0.449533	1.17716		1.2601	2.51059	1.63342	2.22524	0.449533	1.17716		-0.517394	-0.638286	1.38269
TGME49_231160-t26_1-p1	transcript=TGME49_231160-t26_1 | gene=TGME49_231160 | organism=Toxoplasma_gondii_ME49 | gene_product=hypothetical protein | transcript_product=hypothetical protein | location=TGME49_chrVIII:1276871-1278429(+) | protein_length=178 | sequence_SO=chromosome | SO=protein_coding | is_pseudo=false	[R].VVGTGELSDPTAVQVAAVK.[Q]					47913.8		34177.9					15.5482		15.0608					-1.34828		-1.93162		-4.94046	-5.39217	-4.70302	-1.34828	-4.72796	-1.93162		2.34259	2.34259	2.74336
Q9Y2J2	Band 4.1-like protein 3 OS=Homo sapiens OX=9606 GN=EPB41L3 PE=1 SV=2	[R].VVHASGDASYSAGDSGDAAAQPAFTGIK.[G]							28200.2							14.7834							-2.20898		-4.79986	-5.28924	-4.8709	-4.66797	-4.6714	-2.20898		1.13721	0.772589	0.569721
P84103	Serine/arginine-rich splicing factor 3 OS=Homo sapiens OX=9606 GN=SRSF3 PE=1 SV=1	[K].VYVGNLGNNGNKTELER.[A]							396567							18.5972							1.6048		-5.08561	-5.21601	-4.69347	-4.64692	-4.62581	1.6048		2.44239	2.44239	1.4692
P14649	Myosin light chain 6B OS=Homo sapiens OX=9606 GN=MYL6B PE=1 SV=1	[K].VVIEFNKDQLEEFK.[E]			157674	52806.9						17.2666	15.6884						-1.48806	-2.03188					-4.83216	-1.48806	-2.03188	-4.46641	-4.7843	-4.43581		-1.77814	-1.48568	3.06117
P09874	Poly [ADP-ribose] polymerase 1 OS=Homo sapiens OX=9606 GN=PARP1 PE=1 SV=4	[R].VVSEDFLQDVSASTK.[S]		80477.4	136281						16.2963	17.0562						-0.910406	-1.69842						-0.910406	-1.69842	-4.8279	-4.66437	-4.63797	-4.4446		-2.1034	-2.07961	3.7408
TGME49_270320-t26_1-p1	transcript=TGME49_270320-t26_1 | gene=TGME49_270320 | organism=Toxoplasma_gondii_ME49 | gene_product=protein phosphatase 2C domain-containing protein | transcript_product=protein phosphatase 2C domain-containing protein | location=TGME49_chrVIII:5277164-5282525(+) | protein_length=538 | sequence_SO=chromosome | SO=protein_coding | is_pseudo=false	[K].VVSGQGVVLSETR.[R]					29500.1	40564	35867.8					14.8484	15.3079	15.1304					-2.04801	-1.17126	-1.862		-4.9748	-5.32058	-4.7747	-2.04801	-1.17126	-1.862		3.3296	3.3296	9.73189
P35580	Myosin-10 OS=Homo sapiens OX=9606 GN=MYH10 PE=1 SV=3	[K].VVSSVLQFGNISFK.[K]			231523	72419.1						17.8208	16.1441						-0.933847	-1.57624					-4.91963	-0.933847	-1.57624	-4.48645	-4.74283	-4.68286		-2.16081	-1.95045	59.9637
P02533	Keratin, type I cytoskeletal 14 OS=Homo sapiens OX=9606 GN=KRT14 PE=1 SV=4	[K].VVSTHEQVLR.[T]			321878	30752.1		45088.5	244005			18.2962	14.9084		15.4605	17.8966			-0.458489	-2.81192		-1.0187	0.904151		-4.97248	-0.458489	-2.81192	-4.59171	-1.0187	0.904151		1.17888	0.0182555	0.0639849
Q7Z3B1	Neuronal growth regulator 1 OS=Homo sapiens OX=9606 GN=NEGR1 PE=1 SV=3	[K].VVVNFAPTIQEIK.[S]			80114.4							16.2898							-2.46487						-4.83015	-2.46487	-4.8567	-4.56214	-4.71861	-4.50221		-0.543747	-0.543747	0.826147
TGME49_206340-t26_1-p1	transcript=TGME49_206340-t26_1 | gene=TGME49_206340 | organism=Toxoplasma_gondii_ME49 | gene_product=hypothetical protein | transcript_product=hypothetical protein | location=TGME49_chrVIIa:1054024-1055163(-) | protein_length=187 | sequence_SO=chromosome | SO=protein_coding | is_pseudo=false	[R].VVVPEADTDVSVGSVDR.[V]					88601.5	60074	92905.6					16.435	15.8745	16.5035					-0.461393	-0.60472	-0.488924		-5.07667	-5.35497	-4.95969	-0.461393	-0.60472	-0.488924		4.6121	4.6121	12.6902
P84098	60S ribosomal protein L19 OS=Homo sapiens OX=9606 GN=RPL19 PE=1 SV=1	[K].VWLDPNETNEIANANSR.[Q]		19986.6	610203	224312	45784.4		67393.7		14.2867	19.2189	17.7751	15.4826		16.0403		-2.91995	0.464284	0.0548242	-1.41387		-0.952075		-2.91995	0.464284	0.0548242	-1.41387	-4.7649	-0.952075		-1.57667	-1.08612	2.12645
P06396	Gelsolin OS=Homo sapiens OX=9606 GN=GSN PE=1 SV=1	[R].VVQGKEPAHLMSLFGGKPMIIYK.[G]	2xOxidation [M11		944430	187544						19.8491	17.5169						1.09444	-0.203451					-4.93306	1.09444	-0.203451	-4.70028	-4.85793	-4.44962		-3.32192	-2.34499	12.1468
Q8WWI1	LIM domain only protein 7 OS=Homo sapiens OX=9606 GN=LMO7 PE=1 SV=3	[R].VTTEIQLPSQSPVEEQSPASLSSLR.[S]			214769	73597.1						17.7124	16.1674						-1.04222	-1.55296					-5.01617	-1.04222	-1.55296	-4.67917	-4.66867	-4.55844		-2.09831	-1.67673	4.00167
P21333	Filamin-A OS=Homo sapiens OX=9606 GN=FLNA PE=1 SV=4	[K].YGGQPVPNFPSK.[L]		89979.5	340426	142263	41736.7	51736.3	75570.3		16.4573	18.377	17.1182	15.349	15.6589	16.2055		-0.749394	-0.377662	-0.60212	-1.54741	-0.820284	-0.78687		-0.749394	-0.377662	-0.60212	-1.54741	-0.820284	-0.78687		-0.475128	-0.801463	6.54648
P35908	Keratin, type II cytoskeletal 2 epidermal OS=Homo sapiens OX=9606 GN=KRT2 PE=1 SV=2	[R].YGSGGGSKGGSISGGGYGSGGGK.[H]					42388.3	105315						15.3714	16.6844						-1.52506	0.205185			-4.90983	-5.29018	-4.75339	-1.52506	0.205185	-4.42685		3.06889	0.181252	0.903762
P07305	Histone H1.0 OS=Homo sapiens OX=9606 GN=H1F0 PE=1 SV=3	[K].YSDMIVAAIQAEK.[N]	1xOxidation [M4]	1.97945e+07	130433943	31851851	1.45638e+07	6.64216e+06	1.38832e+07		24.2386	26.9587	24.9249	23.7959	22.6632	23.7268		7.03189	8.2041	7.20455	6.89945	6.18405	6.73443		7.03189	8.2041	7.20455	6.89945	6.18405	6.73443		-0.874203	-0.798558	2.45748
P07305	Histone H1.0 OS=Homo sapiens OX=9606 GN=H1F0 PE=1 SV=3	[K].YSDMIVAAIQAEKNR.[A]	1xOxidation [M4]	587627	1.31099e+06	214526	1.43362e+06	52537	32960		19.1645	20.3222	17.7108	20.4512	15.681	15.0084		1.95784	1.56758	-0.00953018	3.55479	-0.798126	-1.98397		1.95784	1.56758	-0.00953018	3.55479	-0.798126	-1.98397		-0.9144	-0.798558	2.45748
P67936	Tropomyosin alpha-4 chain OS=Homo sapiens OX=9606 GN=TPM4 PE=1 SV=3	[K].YSEKEDKYEEEIK.[L]		435746	9.42484e+06	3.31174e+06	255717	351161	1.00556e+06		18.7331	23.168	21.6592	17.9642	18.4218	19.9396		1.52642	4.41339	3.93883	1.06775	1.9426	2.94717		1.52642	4.41339	3.93883	1.06775	1.9426	2.94717		-1.30704	-1.11715	10.5206
P18621	60S ribosomal protein L17 OS=Homo sapiens OX=9606 GN=RPL17 PE=1 SV=3	[R].YSLDPENPTK.[S]		4.79513e+06	1.48267e+07	5.58596e+06	2.0794e+06	2.12783e+06	2.10233e+06		22.1931	23.8217	22.4134	20.9877	21.021	21.0036		4.98644	5.06705	4.69305	4.0913	4.54178	4.01115		4.98644	5.06705	4.69305	4.0913	4.54178	4.01115		-0.700769	-0.745061	2.51651
P25311	Zinc-alpha-2-glycoprotein OS=Homo sapiens OX=9606 GN=AZGP1 PE=1 SV=2	[R].YSLTYIYTGLSK.[H]			107170				59361.3			16.7095				15.8572			-2.04511				-1.13517		-4.95743	-2.04511	-4.80884	-4.46381	-4.61088	-1.13517		0.533841	0.773282	0.832206
P06753	Tropomyosin alpha-3 chain OS=Homo sapiens OX=9606 GN=TPM3 PE=1 SV=2	[K].YSQKEDKYEEEIK.[I]		141149	4.94811e+06	1.12088e+06	92126.1	120033	332124		17.1069	22.2384	20.0962	16.4913	16.8731	18.3414		-0.0998437	3.4838	2.37588	-0.405113	0.393899	1.34896		-0.0998437	3.4838	2.37588	-0.405113	0.393899	1.34896		-1.47403	-1.26178	3.52114
P07305	Histone H1.0 OS=Homo sapiens OX=9606 GN=H1F0 PE=1 SV=3	[K].YSDMIVAAIQAEK.[N]			7.6885e+06	2.46767e+06	16197.6	5796.53	1.06783e+06			22.8743	21.2347	13.9835	12.501	20.0263			4.11963	3.51439	-2.91294	-3.9782	3.03385		-4.86232	4.11963	3.51439	-2.91294	-3.9782	3.03385		-2.20966	-0.798558	2.45748
P09493	Tropomyosin alpha-1 chain OS=Homo sapiens OX=9606 GN=TPM1 PE=1 SV=2	[K].YSQKEDRYEEEIK.[V]		25284.2	1.09783e+06	362811	20615.9	41222.9	133953		14.6259	20.0662	18.4689	14.3315	15.3312	17.0314		-2.58076	1.31158	0.748538	-2.56497	-1.14801	0.0389606		-2.58076	1.31158	0.748538	-2.56497	-1.14801	0.0389606		-1.05113	-0.922806	4.58781
P62269	40S ribosomal protein S18 OS=Homo sapiens OX=9606 GN=RPS18 PE=1 SV=3	[K].YSQVLANGLDNK.[L]		923377	4.03063e+06	1.60527e+06	545785	798660	693447		19.8166	21.9426	20.6144	19.058	19.6072	19.4034		2.60986	3.18793	2.89406	2.16154	3.12805	2.41102		2.60986	3.18793	2.89406	2.16154	3.12805	2.41102		-0.330413	-0.612376	1.94788
P21333	Filamin-A OS=Homo sapiens OX=9606 GN=FLNA PE=1 SV=4	[K].YTPVQQGPVGVNVTYGGDPIPK.[S]			565546	250219			129029			19.1093	17.9328			16.9773			0.35464	0.21251			-0.0150685		-4.82045	0.35464	0.21251	-4.49145	-4.70972	-0.0150685		-1.65431	-0.801463	6.54648
P05387	60S acidic ribosomal protein P2 OS=Homo sapiens OX=9606 GN=RPLP2 PE=1 SV=1	[R].YVASYLLAALGGNSSPSAK.[D]			214116	90617.3			27366.7			17.708	16.4675			14.7401			-1.04661	-1.25282			-2.25227		-4.93107	-1.04661	-1.25282	-4.58174	-4.88426	-2.25227		-1.49592	-0.520351	0.985711
Q03135	Caveolin-1 OS=Homo sapiens OX=9606 GN=CAV1 PE=1 SV=4	[K].YVDSEGHLYTVPIR.[E]		106618	867049	459980	46817.7		158650		16.7021	19.7258	18.8112	15.5148		17.2755		-0.504616	0.971108	1.09089	-1.38167		0.283089		-0.504616	0.971108	1.09089	-1.38167	-4.82597	0.283089		-2.49398	-1.30192	1.87583
TGME49_239740-t26_1-p1	transcript=TGME49_239740-t26_1 | gene=TGME49_239740 | organism=Toxoplasma_gondii_ME49 | gene_product=dense granule protein GRA14 | transcript_product=dense granule protein GRA14 | location=TGME49_chrVI:883160-884386(-) | protein_length=408 | sequence_SO=chromosome | SO=protein_coding | is_pseudo=false	[K].YVLAAQLSR.[S]					2.22149e+06	1.47137e+06	1.97126e+06					21.0831	20.4887	20.9107					4.18666	4.00955	3.91829		-4.87083	-5.31772	-4.9038	4.18666	4.00955	3.91829		9.06895	5.93448	38.4972
Q02413	Desmoglein-1 OS=Homo sapiens OX=9606 GN=DSG1 PE=1 SV=2	[R].YVMGNNPADLLAVDSR.[T]	1xOxidation [M3]	198678	880787	260016	160908	141770	689164		17.6001	19.7484	17.9882	17.2959	17.1132	19.3945		0.39337	0.993788	0.26792	0.399442	0.634016	2.40209		0.39337	0.993788	0.26792	0.399442	0.634016	2.40209		0.593489	0.349231	0.963474
TGME49_310780-t26_1-p1	transcript=TGME49_310780-t26_1 | gene=TGME49_310780 | organism=Toxoplasma_gondii_ME49 | gene_product=dense granule protein GRA4 | transcript_product=dense granule protein GRA4 | location=TGME49_chrXI:1589170-1590207(-) | protein_length=345 | sequence_SO=chromosome | SO=protein_coding | is_pseudo=false	[R].YYHSMYGNK.[T]	1xOxidation [M5]				363446	38842.6	112694					18.4714	15.2454	16.782					1.57495	-1.23382	-0.210357		-5.00222	-5.21243	-4.76922	1.57495	-1.23382	-0.210357		5.03821	5.11494	9.55313
Q92522	Histone H1x OS=Homo sapiens OX=9606 GN=H1FX PE=1 SV=1	[K].YSQLVVETIR.[R]		265195	1.02401e+06	321518	114256	74571.8	165459		18.0167	19.9658	18.2945	16.8019	16.1863	17.3361		0.809993	1.21115	0.574218	-0.0945275	-0.29283	0.343709		0.809993	1.21115	0.574218	-0.0945275	-0.29283	0.343709		-0.879671	-1.28741	2.94362
Q86YZ3	Hornerin OS=Homo sapiens OX=9606 GN=HRNR PE=1 SV=2	[RS].YGQQGSGSGQSPSR.[G]		54389.4		137759		23624.8			15.731		17.0718		14.528			-1.47566		-0.648533		-1.95116			-1.47566	-5.2371	-0.648533	-4.51097	-1.95116	-4.50617		-1.20233	0.626863	2.59816
P84243	Histone H3.3 OS=Homo sapiens OX=9606 GN=H3F3A PE=1 SV=2	[R].YRPGTVALR.[E]		4.32515e+06	1.17269e+06	390686	45276.6	221092	329320		22.0443	20.1614	18.5756	15.4665	17.7543	18.3291		4.83762	1.40674	0.855328	-1.42996	1.27512	1.33673		4.83762	1.40674	0.855328	-1.42996	1.27512	1.33673		-1.9726	-2.03964	2.24805
Q02413	Desmoglein-1 OS=Homo sapiens OX=9606 GN=DSG1 PE=1 SV=2	[K].YQGTILSIDDNLQR.[T]			175860	50912.1			108274			17.4241	15.6357			16.7243			-1.33058	-2.0846			-0.268072		-4.78907	-1.33058	-2.0846	-4.56179	-4.7955	-0.268072		-0.473708	0.349231	0.963474
P35579	Myosin-9 OS=Homo sapiens OX=9606 GN=MYH9 PE=1 SV=4	[K].YKASITALEAK.[I]		28871.7	323036	141322	16668.4	20923.9	41840.5		14.8174	18.3013	17.1086	14.0248	14.3529	15.3526		-2.38934	-0.45331	-0.61169	-2.8716	-2.12631	-1.63979		-2.38934	-0.45331	-0.61169	-2.8716	-2.12631	-1.63979		-1.06112	-1.7311	75.0609
Q9NYL9	Tropomodulin-3 OS=Homo sapiens OX=9606 GN=TMOD3 PE=1 SV=1	[K].YKDLDEDELLGNLSETELK.[Q]			635598	194977						19.2778	17.5729						0.52311	-0.147377					-4.90593	0.52311	-0.147377	-4.43884	-4.81418	-4.52718		-3.08334	-1.8006	9.86752
P61254	60S ribosomal protein L26 OS=Homo sapiens OX=9606 GN=RPL26 PE=1 SV=1	[K].YKEETIEK.[M]		259561	1044891	455881	131375	255016	237520		17.9857	19.9949	18.7983	17.0033	17.9602	17.8577		0.779013	1.24028	1.07798	0.1069	1.48106	0.865288		0.779013	1.24028	1.07798	0.1069	1.48106	0.865288		-0.214674	-0.687735	2.38245
P61254	60S ribosomal protein L26 OS=Homo sapiens OX=9606 GN=RPL26 PE=1 SV=1	[K].YKEETIEKMQE.[-]	1xOxidation [M9]	118540	53655.3	98261.1	49280.6	60934.7	46695.5		16.855	15.7114	16.5843	15.5887	15.895	15.511		-0.35169	-3.04321	-1.13599	-1.30771	-0.584196	-1.48141		-0.35169	-3.04321	-1.13599	-1.30771	-0.584196	-1.48141		0.38586	-0.687735	2.38245
P63104	14-3-3 protein zeta/delta OS=Homo sapiens OX=9606 GN=YWHAZ PE=1 SV=1	[R].YLAEVAAGDDKK.[G]			73521.9	48466.2		19458.7	26340			16.1659	15.5647		14.2481	14.685			-2.58876	-2.15563		-2.23104	-2.30744		-4.8994	-2.58876	-2.15563	-4.58292	-2.23104	-2.30744		0.174128	-0.2884	0.402571
O95425	Supervillin OS=Homo sapiens OX=9606 GN=SVIL PE=1 SV=2	[R].YQTQPVTLGEVEQVQSGK.[L]			93627.6	36860.2						16.5146	15.1698						-2.24	-2.55055					-4.96364	-2.24	-2.55055	-4.51867	-4.80941	-4.6579		-1.4106	-1.03429	2.2621
P18621	60S ribosomal protein L17 OS=Homo sapiens OX=9606 GN=RPL17 PE=1 SV=3	[K].YLKDVTLQK.[Q]		1.02352e+06	2.11767e+06	563134	346385	288489	279490		19.9651	21.014	19.1031	18.402	18.1382	18.0924		2.75841	2.2594	1.3828	1.50558	1.65898	1.10003		2.75841	2.2594	1.3828	1.50558	1.65898	1.10003		-0.712004	-0.745061	2.51651
O75340	Programmed cell death protein 6 OS=Homo sapiens OX=9606 GN=PDCD6 PE=1 SV=1	[K].YITDWQNVFR.[T]					164928		138208					17.3315		17.0765					0.435039		0.0840753		-5.07679	-5.37449	-4.67654	0.435039	-4.66188	0.0840753		3.66168	5.79024	17.3889
P07437	Tubulin beta chain OS=Homo sapiens OX=9606 GN=TUBB PE=1 SV=2 Tubulin beta-4B chain OS=Homo sapiens OX=9606 GN=TUBB4B PE=1 SV=1	[R].YLTVAAVFR.[G]		49805.5	1.29482e+06	423806	111659	21804.3	185424		15.604	20.3043	18.693	16.7687	14.4123	17.5005		-1.60269	1.54967	0.972723	-0.12769	-2.06685	0.508066		-1.60269	1.54967	0.972723	-0.12769	-2.06685	0.508066		-0.868727	-0.397563	0.718845
P63173	60S ribosomal protein L38 OS=Homo sapiens OX=9606 GN=RPL38 PE=1 SV=2	[R].YLYTLVITDKEK.[A]				190142	27210.8		132684				17.5367	14.7319		17.0176				-0.183601	-2.16455		0.0252326		-5.07394	-5.27189	-0.183601	-2.16455	-4.80242	0.0252326		1.1959	-0.0739875	0.0503044
Q9Y3C1	Nucleolar protein 16 OS=Homo sapiens OX=9606 GN=NOP16 PE=1 SV=2	[R].YMVENHGEDYK.[A]	1xOxidation [M2]	240112	435889	177829	71485.6	74215.5	52240.5		17.8734	18.7336	17.4401	16.1254	16.1794	15.6729		0.666648	-0.0210447	-0.280189	-0.771072	-0.29974	-1.31952		0.666648	-0.0210447	-0.280189	-0.771072	-0.29974	-1.31952		-0.918582	-1.49091	4.31549
P21333	Filamin-A OS=Homo sapiens OX=9606 GN=FLNA PE=1 SV=4	[K].YNEQHVPGSPFTAR.[V]		39900.8	295672	142591	16059.8	15872.7	42681.7		15.2841	18.1736	17.1215	13.9712	13.9543	15.3813		-1.92257	-0.581007	-0.5988	-2.92527	-2.52492	-1.61107		-1.92257	-0.581007	-0.5988	-2.92527	-2.52492	-1.61107		-1.31963	-0.801463	6.54648
P68133	Actin, alpha skeletal muscle OS=Homo sapiens OX=9606 GN=ACTA1 PE=1 SV=1	[K].YPIEHGIITNWDDMEK.[I]	1xOxidation [M14]		7.69888e+06	3.61314e+06	101726		1.00691e+06			22.8762	21.7848	16.6343		19.9415			4.12157	4.0645	-0.262111		2.94909		-4.99015	4.12157	4.0645	-0.262111	-4.80759	2.94909		-1.77218	-1.07786	0.795
P02533	Keratin, type I cytoskeletal 14 OS=Homo sapiens OX=9606 GN=KRT14 PE=1 SV=4 Keratin, type I cytoskeletal 10 OS=Homo sapiens OX=9606 GN=KRT10 PE=1 SV=6 Keratin, type I cytoskeletal 16 OS=Homo sapiens OX=9606 GN=KRT16 PE=1 SV=4	[K].VTMQNLNDR.[L]	1xOxidation [M3]	1.08472e+06	13569520	1.24829e+06	1.1326e+06	1.68254e+06	2.50057e+06		20.0489	23.6939	20.2515	20.1112	20.6822	21.2538		2.84219	4.93922	2.5312	3.21477	4.20304	4.26142		2.84219	4.93922	2.5312	3.21477	4.20304	4.26142		0.45554	0.0182555	0.0639849
P02533	Keratin, type I cytoskeletal 14 OS=Homo sapiens OX=9606 GN=KRT14 PE=1 SV=4 Keratin, type I cytoskeletal 10 OS=Homo sapiens OX=9606 GN=KRT10 PE=1 SV=6 Keratin, type I cytoskeletal 16 OS=Homo sapiens OX=9606 GN=KRT16 PE=1 SV=4	[K].VTMQNLNDR.[L]		254227	12594493	841695	409522	110993	1.15391e+06		17.9558	23.5863	19.6829	18.6436	16.7601	20.1381		0.749057	4.83164	1.96262	1.74714	0.280941	3.1457		0.749057	4.83164	1.96262	1.74714	0.280941	3.1457		-0.789844	0.0182555	0.0639849
Q13428	Treacle protein OS=Homo sapiens OX=9606 GN=TCOF1 PE=1 SV=3	[K].VLTELLEQER.[K]		87129.9	408302	243524	114347	27277.4	143497		16.4109	18.6393	17.8937	16.8031	14.7354	17.1307		-0.795823	-0.115367	0.17338	-0.0933817	-1.74375	0.138262		-0.795823	-0.115367	0.17338	-0.0933817	-1.74375	0.138262		-0.320355	0.290875	0.456564
Q13428	Treacle protein OS=Homo sapiens OX=9606 GN=TCOF1 PE=1 SV=3	[K].VLTELLEQERK.[K]			86801.4		27259.4					16.4054		14.7345					-2.34921		-2.16197				-4.80789	-2.34921	-4.66648	-2.16197	-4.82303	-4.68151		0.0523581	0.290875	0.456564
Q8NHP8	Putative phospholipase B-like 2 OS=Homo sapiens OX=9606 GN=PLBD2 PE=1 SV=2	[R].VLTILEQIPGMVVVADK.[T]	1xOxidation [M11]		77403.7	46935.4						16.2401	15.5184						-2.51453	-2.20193					-4.98499	-2.51453	-2.20193	-4.42947	-4.88288	-4.48253		-1.36448	-1.36448	1.94578
Q08188	Protein-glutamine gamma-glutamyltransferase E OS=Homo sapiens OX=9606 GN=TGM3 PE=1 SV=4	[R].VITNFNSAHDTDR.[N]			710387	24899.1			13638.2			19.4382	14.6038			13.7354			0.6836	-3.11651			-3.25704		-4.99852	0.6836	-3.11651	-4.43247	-4.6241	-3.25704		-1.62739	-0.29331	0.410136
TGME49_215220-t26_1-p1	transcript=TGME49_215220-t26_1 | gene=TGME49_215220 | organism=Toxoplasma_gondii_ME49 | gene_product=hypothetical protein | transcript_product=hypothetical protein | location=TGME49_chrX:6825368-6827843(+) | protein_length=629 | sequence_SO=chromosome | SO=protein_coding | is_pseudo=false	[R].VLTSDEGDAGLDAAPR.[Q]			46243.8		179305	116136	131522			15.497		17.4521	16.8255	17.0049			-3.25767		0.555617	0.346283	0.0125467		-4.86758	-3.25767	-4.69514	0.555617	0.346283	0.0125467		4.57828	4.7584	12.117
TGME49_215220-t26_1-p1	transcript=TGME49_215220-t26_1 | gene=TGME49_215220 | organism=Toxoplasma_gondii_ME49 | gene_product=hypothetical protein | transcript_product=hypothetical protein | location=TGME49_chrX:6825368-6827843(+) | protein_length=629 | sequence_SO=chromosome | SO=protein_coding | is_pseudo=false	[R].VITSDKEKENVSVAIQGDDAR.[V]							38240.4							15.2228							-1.76959		-4.97099	-5.30041	-4.7825	-4.59154	-4.75647	-1.76959		1.3121	4.7584	12.117
P42766	60S ribosomal protein L35 OS=Homo sapiens OX=9606 GN=RPL35 PE=1 SV=2	[R].VLTVINQTQK.[E]		7.76953e+06	3.69351e+07	1.51914e+07	3.21923e+06	5.94412e+06	6.54364e+06		22.8894	25.1385	23.8568	21.6183	22.503	22.6417		5.68269	6.38384	6.13643	4.72185	6.02386	5.64926		5.68269	6.38384	6.13643	4.72185	6.02386	5.64926		-0.602667	-0.538575	1.2191
P35579	Myosin-9 OS=Homo sapiens OX=9606 GN=MYH9 PE=1 SV=4	[R].VISGVLQLGNIVFKK.[E]			2.81719e+06	849704	15342.9		136664			21.4258	19.6966	13.9053		17.0603			2.67118	1.97628	-2.99116		0.067874		-5.04421	2.67118	1.97628	-2.99116	-4.61095	0.067874		-2.37916	-1.7311	75.0609
P42766	60S ribosomal protein L35 OS=Homo sapiens OX=9606 GN=RPL35 PE=1 SV=2	[R].VLTVINQTQKENLR.[K]		13582463	62171800	20112660	8205441	7275171	8.52918e+06		23.6952	25.8898	24.2616	22.9681	22.7945	23.024		6.48854	7.13511	6.54128	6.07171	6.31538	6.03157		6.48854	7.13511	6.54128	6.07171	6.31538	6.03157		-0.582089	-0.538575	1.2191
P35908	Keratin, type II cytoskeletal 2 epidermal OS=Homo sapiens OX=9606 GN=KRT2 PE=1 SV=2	[K].VLYDAEISQIHQSVTDTNVILSMDNSR.[N]	1xOxidation [M23]		1.26942e+06	95927.6						20.2757	16.5497						1.5211	-1.17066					-4.89925	1.5211	-1.17066	-4.56158	-4.64239	-4.47352		-3.04289	0.181252	0.903762
Q6NZI2	Caveolae-associated protein 1 OS=Homo sapiens OX=9606 GN=CAVIN1 PE=1 SV=1	[K].VMIYQDEVKLPAK.[L]			451327	128431			101791			18.7838	16.9706			16.6352			0.0291686	-0.749692			-0.357158		-5.08008	0.0291686	-0.749692	-4.51813	-4.6734	-0.357158		-1.24936	-1.10579	4.72458
Q6NZI2	Caveolae-associated protein 1 OS=Homo sapiens OX=9606 GN=CAVIN1 PE=1 SV=1	[K].VMIYQDEVKLPAK.[L]	1xOxidation [M2]	1.55204e+06	2.05062e+06	773573	352503	363046	522617		20.5657	20.9676	19.5612	18.4273	18.4698	18.9954		3.35903	2.21299	1.84086	1.53084	1.99062	2.00299		3.35903	2.21299	1.84086	1.53084	1.99062	2.00299		-0.629473	-1.10579	4.72458
P35579	Myosin-9 OS=Homo sapiens OX=9606 GN=MYH9 PE=1 SV=4	[K].VMQEQGTHPK.[F]			905462							19.7883							1.03365						-4.85369	1.03365	-4.68244	-4.63503	-4.72424	-4.67136		-1.84271	-1.7311	75.0609
P08962	CD63 antigen OS=Homo sapiens OX=9606 GN=CD63 PE=1 SV=2	[K].VMSEFNNNFR.[Q]	1xOxidation [M2]		36945.8	24538.2	24543.6	22675.2	19179.3			15.1731	14.5827	14.5831	14.4688	14.2273			-3.58152	-3.13758	-2.31338	-2.01035	-2.76514		-4.91063	-3.58152	-3.13758	-2.31338	-2.01035	-2.76514		1.51362	1.51362	3.49018
P62701	40S ribosomal protein S4, X isoform OS=Homo sapiens OX=9606 GN=RPS4X PE=1 SV=2	[K].VNDTIQIDLETGK.[I]			243515	150858			45832.3			17.8936	17.2028			15.4841			-0.860996	-0.517493			-1.50833		-4.90102	-0.860996	-0.517493	-4.42557	-4.68359	-1.50833		-1.44599	-0.560202	0.967538
P42766	60S ribosomal protein L35 OS=Homo sapiens OX=9606 GN=RPL35 PE=1 SV=2	[R].VLTVINQTQKENLRK.[F]		776915	2916492	746501	602292	318148	363728		19.5674	21.4758	19.5098	19.2001	18.2793	18.4725		2.36069	2.72116	1.78946	2.30367	1.80016	1.4801		2.36069	2.72116	1.78946	2.30367	1.80016	1.4801		-0.429129	-0.538575	1.2191
P21333	Filamin-A OS=Homo sapiens OX=9606 GN=FLNA PE=1 SV=4	[K].VNQPASFAVSLNGAK.[G]		31592.5	265591	112966		24893.6	66969.5		14.9473	18.0188	16.7855		14.6035	16.0312		-2.25941	-0.7358	-0.934792		-1.87569	-0.961186		-2.25941	-0.7358	-0.934792	-4.57818	-1.87569	-0.961186		-1.16168	-0.801463	6.54648
P35579	Myosin-9 OS=Homo sapiens OX=9606 GN=MYH9 PE=1 SV=4	[R].VISGVLQLGNIVFK.[K]			1.55845e+06	496170			45986.1			20.5717	18.9205			15.4889			1.81704	1.20015			-1.50349		-5.03505	1.81704	1.20015	-4.47151	-4.78552	-1.50349		-2.91422	-1.7311	75.0609
P35579	Myosin-9 OS=Homo sapiens OX=9606 GN=MYH9 PE=1 SV=4	[K].VIQYLAYVASSHK.[S]			5.85105e+06	2.00478e+06	119069		531363			22.4803	20.935	16.8614		19.0193			3.72562	3.21469	-0.0349928		2.02694		-5.07924	3.72562	3.21469	-0.0349928	-4.73629	2.02694		-1.53514	-1.7311	75.0609
P62913	60S ribosomal protein L11 OS=Homo sapiens OX=9606 GN=RPL11 PE=1 SV=2	[K].VLEQLTGQTPVFSK.[A]		271564	1.09649e+06	619576	191321	141699	331491		18.0509	20.0645	19.2409	17.5456	17.1125	18.3386		0.844228	1.30981	1.5206	0.649203	0.633301	1.34621		0.844228	1.30981	1.5206	0.649203	0.633301	1.34621		-0.348643	0.272122	0.267328
P60660	Myosin light polypeptide 6 OS=Homo sapiens OX=9606 GN=MYL6 PE=1 SV=2	[K].VLGNPKSDEMNVK.[V]		69055.7	598228	530280	185601		180272		16.0755	19.1903	19.0164	17.5018		17.4598		-1.13123	0.435689	1.29607	0.605412		0.467415		-1.13123	0.435689	1.29607	0.605412	-4.83741	0.467415		-1.45504	-0.835341	2.76722
P60660	Myosin light polypeptide 6 OS=Homo sapiens OX=9606 GN=MYL6 PE=1 SV=2	[K].VLGNPKSDEMNVK.[V]	1xOxidation [M10]	427556	755209	440243	412219	141537	253351		18.7058	19.5265	18.7479	18.6531	17.1108	17.9508		1.49905	0.771871	1.02762	1.75662	0.631642	0.958376		1.49905	0.771871	1.02762	1.75662	0.631642	0.958376		0.0160308	-0.835341	2.76722
P08708	40S ribosomal protein S17 OS=Homo sapiens OX=9606 GN=RPS17 PE=1 SV=2	[R].VIIEKYYTR.[L]		52636	36838.3		30366.7				15.6838	15.1689		14.8902				-1.52294	-3.58572		-2.00623				-1.52294	-3.58572	-4.94892	-2.00623	-4.77291	-4.47691		-0.399489	-1.23491	4.32648
P08238	Heat shock protein HSP 90-beta OS=Homo sapiens OX=9606 GN=HSP90AB1 PE=1 SV=4	[K].VILHLKEDQTEYLEER.[R]			76100.7				58666.5			16.2156				15.8402			-2.53902				-1.15215		-4.86792	-2.53902	-4.78738	-4.51109	-4.65055	-1.15215		0.626843	-0.226267	0.219716
P35579	Myosin-9 OS=Homo sapiens OX=9606 GN=MYH9 PE=1 SV=4	[K].VLLQGKGDSEHK.[R]		21876	840011	254921					14.4171	19.68	17.9597					-2.78964	0.925404	0.239369					-2.78964	0.925404	0.239369	-4.64561	-4.76724	-4.62569		-4.13789	-1.7311	75.0609
P09493	Tropomyosin alpha-1 chain OS=Homo sapiens OX=9606 GN=TPM1 PE=1 SV=2	[K].VLSDKLKEAETR.[A]			325279	69599.3	16680.9	12542.4	28818.6			18.3113	16.0868	14.0259	13.6145	14.8147			-0.443328	-1.63354	-2.87053	-2.86465	-2.17769		-5.02504	-0.443328	-1.63354	-2.87053	-2.86465	-2.17769		-0.27032	-0.922806	4.58781
P35579	Myosin-9 OS=Homo sapiens OX=9606 GN=MYH9 PE=1 SV=4	[K].VLLQGKGDSEHKR.[K]			315595							18.2677							-0.486931						-4.85913	-0.486931	-4.67591	-4.45772	-4.69196	-4.49167		-1.20646	-1.7311	75.0609
TGME49_215220-t26_1-p1	transcript=TGME49_215220-t26_1 | gene=TGME49_215220 | organism=Toxoplasma_gondii_ME49 | gene_product=hypothetical protein | transcript_product=hypothetical protein | location=TGME49_chrX:6825368-6827843(+) | protein_length=629 | sequence_SO=chromosome | SO=protein_coding | is_pseudo=false	[R].VLPSGEGKENASVAFQGDDAR.[V]		11285.8			175316	80114.7	156897		13.4622			17.4196	16.2898	17.2595		-3.74448			0.523161	-0.189394	0.267057		-3.74448	-5.20844	-4.75759	0.523161	-0.189394	0.267057		4.77045	4.7584	12.117
P21589	5'-nucleotidase OS=Homo sapiens OX=9606 GN=NT5E PE=1 SV=1	[K].VLPVGDEVVGIVGYTSK.[E]			70653.9							16.1085							-2.64616						-4.84044	-2.64616	-4.78804	-4.67364	-4.73937	-4.58047		-0.572944	-0.321763	0.228581
O00159	Unconventional myosin-Ic OS=Homo sapiens OX=9606 GN=MYO1C PE=1 SV=4	[R].VLQALGSEPIQYAVPVVK.[Y]			714830	376066			77759.1			19.4472	18.5206			16.2467			0.692595	0.800306			-0.745678		-4.99669	0.692595	0.800306	-4.60569	-4.65866	-0.745678		-2.16875	-1.70343	8.7537
P61604	10 kDa heat shock protein, mitochondrial OS=Homo sapiens OX=9606 GN=HSPE1 PE=1 SV=2	[K].VLQATVVAVGSGSK.[G]						17901.4	33766.3						14.1278	15.0433						-2.35139	-1.94911		-5.07127	-5.26302	-4.70149	-4.61789	-2.35139	-1.94911		2.03913	2.03913	2.95936
P08779	Keratin, type I cytoskeletal 16 OS=Homo sapiens OX=9606 GN=KRT16 PE=1 SV=4	[R].VLQGLEIELQSQLSMK.[A]	1xOxidation [M15]		57517.7							15.8117							-2.94293						-4.8506	-2.94293	-4.68338	-4.56992	-4.7024	-4.53098		-0.442128	0.289347	0.93167
Q02413	Desmoglein-1 OS=Homo sapiens OX=9606 GN=DSG1 PE=1 SV=2	[R].VIQPTSGMIGSLSMHPELANAHNVIVTER.[V]	2xOxidation [M8		143119							17.1269							-1.62779						-4.79855	-1.62779	-4.74584	-4.69633	-4.66945	-4.58264		-0.925416	0.349231	0.963474
P35580	Myosin-10 OS=Homo sapiens OX=9606 GN=MYH10 PE=1 SV=3	[K].VIQYLAHVASSHK.[G]		27776.5	1.41121e+06	426597	24100.4	14512.2	87530.4		14.7616	20.4285	18.7025	14.5568	13.825	16.4175		-2.44513	1.67385	0.982194	-2.33967	-2.65419	-0.574905		-2.44513	1.67385	0.982194	-2.33967	-2.65419	-0.574905		-1.92656	-1.95045	59.9637
P04406	Glyceraldehyde-3-phosphate dehydrogenase OS=Homo sapiens OX=9606 GN=GAPDH PE=1 SV=3	[R].VIISAPSADAPMFVMGVNHEKYDNSLK.[I]	2xOxidation [M12		114747				23025			16.8081				14.4909			-1.94654				-2.50149		-5.03208	-1.94654	-4.69503	-4.561	-4.6115	-2.50149		-0.000112015	0.407759	0.592568
O00159	Unconventional myosin-Ic OS=Homo sapiens OX=9606 GN=MYO1C PE=1 SV=4	[R].VNSININQGSITFAGGPGR.[D]			346753	174511			54003			18.4035	17.413			15.7208			-0.351096	-0.307361			-1.27165		-4.89967	-0.351096	-0.307361	-4.56923	-4.86039	-1.27165		-1.71438	-1.70343	8.7537
P62750	60S ribosomal protein L23a OS=Homo sapiens OX=9606 GN=RPL23A PE=1 SV=1	[K].VNTLIRPDGEK.[K]		1.67849e+06	4.17695e+06	2.43468e+06	653522	1.16446e+06	1.44756e+06		20.6787	21.994	21.2153	19.3179	20.1512	20.4652		3.47203	3.23937	3.49498	2.42144	3.67205	3.47279		3.47203	3.23937	3.49498	2.42144	3.67205	3.47279		-0.213366	-0.330071	0.980072
P62750	60S ribosomal protein L23a OS=Homo sapiens OX=9606 GN=RPL23A PE=1 SV=1	[K].VNTLIRPDGEKK.[A]		3.72332e+06	9.06673e+06	5.09569e+06	1.44736e+06	2.87805e+06	3.08926e+06		21.8282	23.1122	22.2808	20.465	21.4567	21.5588		4.62145	4.35751	4.56052	3.56855	4.97749	4.56643		4.62145	4.35751	4.56052	3.56855	4.97749	4.56643		-0.14234	-0.330071	0.980072
TGME49_215460-t26_1-p1	transcript=TGME49_215460-t26_1 | gene=TGME49_215460 | organism=Toxoplasma_gondii_ME49 | gene_product=ribosomal protein RPS24 | transcript_product=ribosomal protein RPS24 | location=TGME49_chrX:6972021-6973684(-) | protein_length=267 | sequence_SO=chromosome | SO=protein_coding | is_pseudo=false	[R].VSDSQSIVVFGLK.[T]			95204.9	28304.6			35561.3			16.5387	14.7887			15.118			-2.2159	-2.93157			-1.87438		-5.03331	-2.2159	-2.93157	-4.53911	-4.73562	-1.87438		-0.322778	0.455756	0.32917
TGME49_247440-t26_1-p1	transcript=TGME49_247440-t26_1 | gene=TGME49_247440 | organism=Toxoplasma_gondii_ME49 | gene_product=hypothetical protein | transcript_product=hypothetical protein | location=TGME49_chrXII:3338791-3339927(-) | protein_length=378 | sequence_SO=chromosome | SO=protein_coding | is_pseudo=false	[K].VSELVEDETPSHVSAPTEPGR.[T]					35258.9	17691.4	34696.2					15.1057	14.1108	15.0825					-1.79074	-2.36841	-1.90991		-4.80141	-5.1695	-4.6794	-1.79074	-2.36841	-1.90991		2.86042	3.6982	2.14342
P62937	Peptidyl-prolyl cis-trans isomerase A OS=Homo sapiens OX=9606 GN=PPIA PE=1 SV=2	[R].VSFELFADKVPK.[T]			1.29674e+06	692354	191280	13103.3	251627			20.3065	19.4012	17.5453	13.6776	17.9409			1.55182	1.68083	0.648893	-2.80153	0.948528		-4.99061	1.55182	1.68083	0.648893	-2.80153	0.948528		0.184619	-0.774637	1.04897
P21333	Filamin-A OS=Homo sapiens OX=9606 GN=FLNA PE=1 SV=4	[R].VSGQGLHEGHTFEPAEFIIDTR.[D]			102362							16.6433							-2.11133						-4.84181	-2.11133	-4.8059	-4.5017	-4.68041	-4.57748		-0.666848	-0.801463	6.54648
P35579	Myosin-9 OS=Homo sapiens OX=9606 GN=MYH9 PE=1 SV=4	[K].VSHLLGINVTDFTR.[G]			1.31702e+07	4.76373e+06	263451		1.03164e+06			23.6508	22.1837	18.0072		19.9765			4.89613	4.46334	1.11074		2.9841		-4.88223	4.89613	4.46334	1.11074	-4.83878	2.9841		-1.74039	-1.7311	75.0609
P04792	Heat shock protein beta-1 OS=Homo sapiens OX=9606 GN=HSPB1 PE=1 SV=2	[R].VSLDVNHFAPDELTVK.[T]		138199	3.02769e+06	1.03625e+06	686803	48026.6	1.13599e+06		17.0764	21.5298	19.9829	19.3895	15.5515	20.1155		-0.130317	2.77514	2.26262	2.4931	-0.927627	3.12312		-0.130317	2.77514	2.26262	2.4931	-0.927627	3.12312		-0.0729507	-0.174985	0.374866
P07585	Decorin OS=Homo sapiens OX=9606 GN=DCN PE=1 SV=1	[K].VSPGAFTPLVK.[L]		75694.5	241714						16.2079	17.8829						-0.998803	-0.871704						-0.998803	-0.871704	-4.87441	-4.44043	-4.71042	-4.61279		-2.33957	-0.947073	1.31717
P35579	Myosin-9 OS=Homo sapiens OX=9606 GN=MYH9 PE=1 SV=4	[R].VRTELADKVTK.[L]			4.83639e+06	1.88203e+06			570057			22.2055	20.8439			19.1207			3.45085	3.12354			2.12834		-5.00946	3.45085	3.12354	-4.5683	-4.78049	2.12834		-2.92846	-1.7311	75.0609
TGME49_257680-t26_1-p1	transcript=TGME49_257680-t26_1 | gene=TGME49_257680 | organism=Toxoplasma_gondii_ME49 | gene_product=myosin light chain MLC1 | transcript_product=myosin light chain MLC1 | location=TGME49_chrVIIb:3911290-3913592(+) | protein_length=213 | sequence_SO=chromosome | SO=protein_coding | is_pseudo=false	[K].VSTGDAMILAR.[Q]	1xOxidation [M7]	27890.8	32876.2	17674.1	19686.1	8437.8	6770.23		14.7675	15.0048	14.1094	14.2649	13.0427	12.725		-2.4392	-3.74989	-3.61097	-2.63154	-3.43652	-4.26741		-2.4392	-3.74989	-3.61097	-2.63154	-3.43652	-4.26741		-0.178472	-1.14873	0.845503
P14923	Junction plakoglobin OS=Homo sapiens OX=9606 GN=JUP PE=1 SV=3	[R].VSVELTNSLFK.[H]			336192			42460.2	56157.2			18.3589			15.3738	15.7772			-0.395719			-1.10535	-1.21522		-4.97853	-0.395719	-4.80893	-4.48766	-1.10535	-1.21522		1.12498	0.51872	0.666005
Q09666	Neuroblast differentiation-associated protein AHNAK OS=Homo sapiens OX=9606 GN=AHNAK PE=1 SV=2	[K].VSVGAPDLSLEASEGSIK.[L]							54268.2							15.7278							-1.26458		-4.89223	-5.15152	-4.91086	-4.59218	-4.82272	-1.26458		1.42504	0.593635	3.00819
Q09666	Neuroblast differentiation-associated protein AHNAK OS=Homo sapiens OX=9606 GN=AHNAK PE=1 SV=2	[K].VSVGAPDLSLEASEGSIKLPK.[M]							70493.7							16.1052							-0.887194		-4.92725	-5.35443	-4.89743	-4.67088	-4.90702	-0.887194		1.57134	0.593635	3.00819
Q08554	Desmocollin-1 OS=Homo sapiens OX=9606 GN=DSC1 PE=1 SV=2	[K].VTATDLDEPDTLHTR.[L]		22427.1	438907	49500.8		52704.5	307897		14.453	18.7436	15.5952		15.6856	18.2321		-2.75374	-0.0110899	-2.12516		-0.793534	1.23969		-2.75374	-0.0110899	-2.12516	-4.48377	-0.793534	1.23969		0.284125	1.22257	2.44456
Q6ZVX7	F-box only protein 50 OS=Homo sapiens OX=9606 GN=NCCRP1 PE=1 SV=1	[R].VTDSSVSVQLRE.[-]		47349.6	143344	45880.8	51656.4	43068.3	101347		15.5311	17.1291	15.4856	15.6567	15.3943	16.6289		-1.67564	-1.62552	-2.23472	-1.23978	-1.08483	-0.363453		-1.67564	-1.62552	-2.23472	-1.23978	-1.08483	-0.363453		0.949273	0.949273	4.26959
Q16777	Histone H2A type 2-C OS=Homo sapiens OX=9606 GN=HIST2H2AC PE=1 SV=4 Histone H2A type 3 OS=Homo sapiens OX=9606 GN=HIST3H2A PE=1 SV=3	[KR].VTIAQGGVLPNIQAVLLPK.[K]		279616	17144000	2.70492e+06	696564	20229.9	1.18752e+06		18.0931	24.0312	21.3672	19.4099	14.3042	20.1795		0.886382	5.27656	3.64683	2.51346	-2.17497	3.18711		0.886382	5.27656	3.64683	2.51346	-2.17497	3.18711		-2.09472	-1.42316	2.91486
TGME49_215220-t26_1-p1	transcript=TGME49_215220-t26_1 | gene=TGME49_215220 | organism=Toxoplasma_gondii_ME49 | gene_product=hypothetical protein | transcript_product=hypothetical protein | location=TGME49_chrX:6825368-6827843(+) | protein_length=629 | sequence_SO=chromosome | SO=protein_coding | is_pseudo=false	[K].VSVAFQGDDAR.[V]					288956	215091	291247					18.1405	17.7146	18.1519					1.24406	1.23541	1.15948		-5.01724	-5.20695	-4.68852	1.24406	1.23541	1.15948		6.18389	4.7584	12.117
P09382	Galectin-1 OS=Homo sapiens OX=9606 GN=LGALS1 PE=1 SV=2	[R].VRGEVAPDAK.[S]		3.10769e+06	6.73879e+06	2.7958e+06	1.48947e+06	1.16063e+06	1.44454e+06		21.5674	22.6841	21.4148	20.5064	20.1465	20.4622		4.36071	3.92941	3.69451	3.60994	3.6673	3.46978		4.36071	3.92941	3.69451	3.60994	3.6673	3.46978		-0.412538	-0.932788	2.61615
P62851	40S ribosomal protein S25 OS=Homo sapiens OX=9606 GN=RPS25 PE=1 SV=1	[K].VRDKLNNLVLFDK.[A]		28198.4	180639	58714.8	82038.2		32544.1		14.7833	17.4627	15.8414	16.324		14.9901		-2.42337	-1.2919	-1.87889	-0.572427		-2.00229		-2.42337	-1.2919	-1.87889	-0.572427	-4.82943	-2.00229		-0.60333	-0.576319	1.22098
Q9Y6C2	EMILIN-1 OS=Homo sapiens OX=9606 GN=EMILIN1 PE=1 SV=3	[K].VQQLEEQVQSLTK.[E]		85394.6	108007	48922.5	18619.6	12314.2			16.3819	16.7208	15.5782	14.1845	13.588			-0.824846	-2.03388	-2.14211	-2.7119	-2.89113			-0.824846	-2.03388	-2.14211	-2.7119	-2.89113	-4.46416		-1.68879	-1.37014	6.27959
Q09666	Neuroblast differentiation-associated protein AHNAK OS=Homo sapiens OX=9606 GN=AHNAK PE=1 SV=2	[K].VNVEAPDVNLEGLGGK.[L]			49348.9							15.5907							-3.16391						-5.01611	-3.16391	-4.9207	-4.68837	-4.81989	-4.63123		-0.34626	0.593635	3.00819
TGME49_270240-t26_1-p1	transcript=TGME49_270240-t26_1 | gene=TGME49_270240 | organism=Toxoplasma_gondii_ME49 | gene_product=MAG1 | transcript_product=MAG1 | location=TGME49_chrVIII:5312269-5313737(+) | protein_length=452 | sequence_SO=chromosome | SO=protein_coding | is_pseudo=false	[R].VPELPEVESFDEVGTGAR.[R]					298168		151388					18.1858		17.2079					1.28933		0.215492		-4.829	-5.38486	-4.82972	1.28933	-4.77846	0.215492		3.92332	4.92705	34.9346
P06396	Gelsolin OS=Homo sapiens OX=9606 GN=GSN PE=1 SV=1	[R].VPFDAATLHTSTAMAAQHGMDDDGTGQK.[Q]	1xOxidation [M]		649403	227903			13751			19.3088	17.7981			13.7473			0.554109	0.0777366			-3.24515		-4.90747	0.554109	0.0777366	-4.58756	-4.76772	-3.24515		-2.77494	-2.34499	12.1468
P06396	Gelsolin OS=Homo sapiens OX=9606 GN=GSN PE=1 SV=1	[R].VPFDAATLHTSTAMAAQHGMDDDGTGQK.[Q]	2xOxidation [M14		970676	479960						19.8886	18.8726						1.13399	1.15223					-4.87591	1.13399	1.15223	-4.60241	-4.82981	-4.59832		-3.81361	-2.34499	12.1468
P02751	Fibronectin OS=Homo sapiens OX=9606 GN=FN1 PE=1 SV=4	[R].VPGTSTSATLTGLTR.[G]		1.00758e+06	1.00865e+06	366339	108494	120712	150363		19.9425	19.944	18.4828	16.7273	16.8812	17.1981		2.73576	1.18935	0.762499	-0.169181	0.402042	0.205684		2.73576	1.18935	0.762499	-0.169181	0.402042	0.205684		-1.41635	-1.69425	11.343
P02768	Serum albumin OS=Homo sapiens OX=9606 GN=ALB PE=1 SV=2	[K].VPQVSTPTLVEVSR.[N]		840759	760708	670884	723386	784761	774160		19.6813	19.537	19.3557	19.4644	19.5819	19.5623		2.47463	0.782337	1.63538	2.56797	3.10272	2.56987		2.47463	0.782337	1.63538	2.56797	3.10272	2.56987		1.11607	0.712437	0.953818
O43281	Embryonal Fyn-associated substrate OS=Homo sapiens OX=9606 GN=EFS PE=1 SV=1	[R].VPSSGPYDCPASFSHPLTR.[V]	1xCarbamidomethyl [C9]		66466	48307.3						16.0203	15.56						-2.73432	-2.16037					-5.07648	-2.73432	-2.16037	-4.58951	-4.75469	-4.45359		-1.27554	-1.12462	2.78147
P35527	Keratin, type I cytoskeletal 9 OS=Homo sapiens OX=9606 GN=KRT9 PE=1 SV=3	[K].VQALEEANNDLENK.[I]			4.71325e+06	1.27039e+06		133550	394495			22.1683	20.2768		17.027	18.5896			3.41365	2.55652		0.54785	1.59725		-5.04473	3.41365	2.55652	-4.51927	0.54785	1.59725		-1.09987	-0.363396	2.17627
Q09666	Neuroblast differentiation-associated protein AHNAK OS=Homo sapiens OX=9606 GN=AHNAK PE=1 SV=2	[K].VQANLGAPDINIEGLDAK.[V]							93488.3							16.5125							-0.479904		-4.80775	-5.22097	-4.88337	-4.6539	-4.71033	-0.479904		1.68932	0.593635	3.00819
P20290	Transcription factor BTF3 OS=Homo sapiens OX=9606 GN=BTF3 PE=1 SV=1	[K].VQASLAANTFTITGHAETK.[Q]			98325.8	62056	57690.5		76833.6			16.5853	15.9213	15.816		16.2294			-2.16936	-1.79904	-1.08039		-0.762952		-4.96543	-2.16936	-1.79904	-1.08039	-4.79781	-0.762952		0.764226	0.764226	0.585959
Q08554	Desmocollin-1 OS=Homo sapiens OX=9606 GN=DSC1 PE=1 SV=2	[K].VQDQDLPNTPHSK.[A]			141374				132609			17.1092				17.0168			-1.64549				0.0244169		-4.89186	-1.64549	-4.94	-4.68335	-4.7046	0.0244169		0.704609	1.22257	2.44456
Q07065	Cytoskeleton-associated protein 4 OS=Homo sapiens OX=9606 GN=CKAP4 PE=1 SV=2	[K].VQEQVHTLLSQDQAQAAR.[L]		40364.8	266946	111622	48356.1	45930.6	82400		15.3008	18.0262	16.7683	15.5614	15.4872	16.3304		-1.90589	-0.728454	-0.952058	-1.33502	-0.992003	-0.662045		-1.90589	-0.728454	-0.952058	-1.33502	-0.992003	-0.662045		0.199111	0.114884	0.322937
TGME49_270240-t26_1-p1	transcript=TGME49_270240-t26_1 | gene=TGME49_270240 | organism=Toxoplasma_gondii_ME49 | gene_product=MAG1 | transcript_product=MAG1 | location=TGME49_chrVIII:5312269-5313737(+) | protein_length=452 | sequence_SO=chromosome | SO=protein_coding | is_pseudo=false	[R].VQGSGDFDISFEVGR.[A]					54549							15.7353							-1.16117				-4.97717	-5.22903	-4.87642	-1.16117	-4.72043	-4.42218		1.59295	4.92705	34.9346
Q8N1N4	Keratin, type II cytoskeletal 78 OS=Homo sapiens OX=9606 GN=KRT78 PE=1 SV=2	[K].VQISQLHQEIQR.[L]			251761			9507.96	22004.8			17.9417			13.2149	14.4255			-0.81295			-3.26425	-2.56687		-4.91193	-0.81295	-4.81128	-4.59137	-3.26425	-2.56687		0.03789	-0.330554	0.526944
TGME49_239740-t26_1-p1	transcript=TGME49_239740-t26_1 | gene=TGME49_239740 | organism=Toxoplasma_gondii_ME49 | gene_product=dense granule protein GRA14 | transcript_product=dense granule protein GRA14 | location=TGME49_chrVI:883160-884386(-) | protein_length=408 | sequence_SO=chromosome | SO=protein_coding | is_pseudo=false	[R].VQPTAPPAPASMLYPSLHR.[L]							196945							17.5874							0.595028		-4.90804	-5.28525	-4.79846	-4.45844	-4.65642	0.595028		2.15731	5.93448	38.4972
TGME49_239740-t26_1-p1	transcript=TGME49_239740-t26_1 | gene=TGME49_239740 | organism=Toxoplasma_gondii_ME49 | gene_product=dense granule protein GRA14 | transcript_product=dense granule protein GRA14 | location=TGME49_chrVI:883160-884386(-) | protein_length=408 | sequence_SO=chromosome | SO=protein_coding | is_pseudo=false	[R].VQPTAPPAPASMLYPSLHR.[L]	1xOxidation [M12]				6.45007e+06	675471	3.39807e+06					22.6209	19.3655	21.6963					5.72445	2.88636	4.70388		-4.7891	-5.13151	-4.78297	5.72445	2.88636	4.70388		9.33942	5.93448	38.4972
P06702	Protein S100-A9 OS=Homo sapiens OX=9606 GN=S100A9 PE=1 SV=1	[K].VIEHIMEDLDTNADK.[Q]							102602							16.6467							-0.34571		-5.06797	-5.38369	-4.7318	-4.61968	-4.72988	-0.34571		1.8294	2.11927	5.16912
Q9BSD7	Cancer-related nucleoside-triphosphatase OS=Homo sapiens OX=9606 GN=NTPCR PE=1 SV=1	[R].QTLSTPGTIILGTIPVPK.[G]			41418.2	19011.4						15.338	14.2146						-3.41667	-3.50575					-4.91909	-3.41667	-3.50575	-4.69202	-4.87104	-4.61773		-0.779761	-1.07605	1.52017
Q9BRT6	Protein LLP homolog OS=Homo sapiens OX=9606 GN=LLPH PE=1 SV=1	[K].TLLDQHGQYPIWMNQR.[Q]	1xOxidation [M13]		1.54099e+06	514774	174454		287637			20.5554	18.9736	17.4125		18.1339			1.80078	1.25326	0.516047		1.14149		-4.93746	1.80078	1.25326	0.516047	-4.6402	1.14149		-0.366412	-0.790296	1.45553
Q5D862	Filaggrin-2 OS=Homo sapiens OX=9606 GN=FLG2 PE=1 SV=1	[R].SGSGQSSGFGQHGSGSGQSSGFGQHESGSGK.[S]						17057.5							14.0581							-2.42105			-4.9421	-5.38302	-4.88524	-4.52566	-2.42105	-4.5617		1.23398	0.775277	1.04995
O14974	Protein phosphatase 1 regulatory subunit 12A OS=Homo sapiens OX=9606 GN=PPP1R12A PE=1 SV=1	[R].SGSYSYLEER.[K]			32145.2				20210.4			14.9723				14.3028			-3.78233				-2.68959		-4.97032	-3.78233	-4.69837	-4.53035	-4.69433	-2.68959		0.51225	0.51225	0.903413
P14625	Endoplasmin OS=Homo sapiens OX=9606 GN=HSP90B1 PE=1 SV=1	[K].SGTSEFLNK.[M]			78182.3	40646.5	9568.18	17286.9	34248.4			16.2546	15.3108	13.224	14.0774	15.0637			-2.50009	-2.40948	-3.67241	-2.40178	-1.92865		-4.83326	-2.50009	-2.40948	-3.67241	-2.40178	-1.92865		0.579995	-0.13101	0.243541
P16402	Histone H1.3 OS=Homo sapiens OX=9606 GN=HIST1H1D PE=1 SV=2 Histone H1.4 OS=Homo sapiens OX=9606 GN=HIST1H1E PE=1 SV=2 Histone H1.2 OS=Homo sapiens OX=9606 GN=HIST1H1C PE=1 SV=2	[R].SGVSLAALK.[K]		1.2629e+07	3.52454e+07	1.42044e+07	6.41338e+06	5.40818e+06	5.38056e+06		23.5902	25.0709	23.7598	22.6127	22.3667	22.3593		6.38353	6.31628	6.03951	5.71622	5.88754	5.36692		6.38353	6.31628	6.03951	5.71622	5.88754	5.36692		-0.58955	-0.70318	1.82759
P16402	Histone H1.3 OS=Homo sapiens OX=9606 GN=HIST1H1D PE=1 SV=2 Histone H1.4 OS=Homo sapiens OX=9606 GN=HIST1H1E PE=1 SV=2 Histone H1.2 OS=Homo sapiens OX=9606 GN=HIST1H1C PE=1 SV=2	[R].SGVSLAALKK.[A]		1.23389e+07	3.16872e+07	1.02675e+07	7.97228e+06	4.13473e+06	4.85667e+06		23.5567	24.9174	23.2916	22.9266	21.9794	22.2115		6.35001	6.16275	5.57126	6.03013	5.50019	5.21914		6.35001	6.16275	5.57126	6.03013	5.50019	5.21914		-0.444857	-0.70318	1.82759
Q9UJV9	Probable ATP-dependent RNA helicase DDX41 OS=Homo sapiens OX=9606 GN=DDX41 PE=1 SV=2	[R].SGNTGIATTFINK.[A]			117464	64271.7	17308.5	14490.2				16.8419	15.9719	14.0792	13.8228				-1.91279	-1.74842	-2.81724	-2.65639			-5.06758	-1.91279	-1.74842	-2.81724	-2.65639	-4.68821		-0.477681	-0.405806	0.29146
P18583	Protein SON OS=Homo sapiens OX=9606 GN=SON PE=1 SV=4	[K].SHDDGNIDLESDSFLK.[F]		75332.1	514318	346590	175852	52552.1	226262		16.201	18.9723	18.4029	17.424	15.6815	17.7876		-1.00573	0.217655	0.682549	0.527567	-0.797712	0.79523		-1.00573	0.217655	0.682549	0.527567	-0.797712	0.79523		0.210202	0.230246	0.639001
P07305	Histone H1.0 OS=Homo sapiens OX=9606 GN=H1F0 PE=1 SV=3	[K].SHYKVGENADSQIK.[L]		3.68532e+06	2.44373e+06	1.21724e+06	1.30839e+06	460888	494416		21.8134	21.2207	20.2152	20.3194	18.8141	18.9154		4.60666	2.46601	2.49486	3.42292	2.33488	1.92296		4.60666	2.46601	2.49486	3.42292	2.33488	1.92296		-0.628917	-0.798558	2.45748
P04264	Keratin, type II cytoskeletal 1 OS=Homo sapiens OX=9606 GN=KRT1 PE=1 SV=6	[K].SKAEAESLYQSK.[Y]		567503	2.11663e+07	1.59043e+06	616917	1.1335e+06	2.04756e+06		19.1143	24.3353	20.601	19.2347	20.1123	20.9655		1.90756	5.58062	2.88066	2.33828	3.63318	3.97307		1.90756	5.58062	2.88066	2.33828	3.63318	3.97307		-0.141441	-0.0837483	0.431184
P04264	Keratin, type II cytoskeletal 1 OS=Homo sapiens OX=9606 GN=KRT1 PE=1 SV=6	[K].SKAEAESLYQSKYEELQITAGR.[H]		488928	3.29878e+07	1.29458e+06	1.44339e+06	77249.8	4.86464e+06		18.8993	24.9754	20.3041	20.461	16.2372	22.2139		1.69256	6.22078	2.58373	3.56459	-0.241929	5.2215		1.69256	6.22078	2.58373	3.56459	-0.241929	5.2215		-0.650971	-0.0837483	0.431184
Q7Z794	Keratin, type II cytoskeletal 1b OS=Homo sapiens OX=9606 GN=KRT77 PE=2 SV=3	[R].SKDEAEALYQTK.[Y]		15255.6	121502	21092.6		7293.51	29405.7		13.8971	16.8906	14.3644		12.8324	14.8438		-3.30965	-1.86402	-3.35587		-3.64678	-2.14859		-3.30965	-1.86402	-3.35587	-4.63753	-3.64678	-2.14859		-0.634453	-0.625626	1.34926
TGME49_202620-t26_1-p1	transcript=TGME49_202620-t26_1 | gene=TGME49_202620 | organism=Toxoplasma_gondii_ME49 | gene_product=hypothetical protein | transcript_product=hypothetical protein | location=TGME49_chrVIIa:3165122-3166114(-) | protein_length=330 | sequence_SO=chromosome | SO=protein_coding | is_pseudo=false	[R].SKDLEQGSTGPDYNVYYPR.[K]					149526		116042					17.19		16.8243					0.293597		-0.168113		-4.93453	-5.38217	-4.95364	0.293597	-4.79509	-0.168113		3.53358	3.53358	2.63815
P35908	Keratin, type II cytoskeletal 2 epidermal OS=Homo sapiens OX=9606 GN=KRT2 PE=1 SV=2	[R].SKEEAEALYHSK.[Y]		28142.9	1.96109e+06		15571		105811		14.7805	20.9032		13.9266		16.6911		-2.42622	2.14858		-2.96986		-0.301277		-2.42622	2.14858	-4.92139	-2.96986	-4.81365	-0.301277		-0.961919	0.181252	0.903762
P35908	Keratin, type II cytoskeletal 2 epidermal OS=Homo sapiens OX=9606 GN=KRT2 PE=1 SV=2	[R].SKEEAEALYHSKYEELQVTVGR.[H]			7.14071e+06	82521.7	70123		790373			22.7676	16.3325	16.0976		19.5922			4.01299	-1.38784	-0.798836		2.59977		-4.82938	4.01299	-1.38784	-0.798836	-4.71852	2.59977		-0.237784	0.181252	0.903762
TGME49_257500-t26_1-p1	transcript=TGME49_257500-t26_1 | gene=TGME49_257500 | organism=Toxoplasma_gondii_ME49 | gene_product=hypothetical protein | transcript_product=hypothetical protein | location=TGME49_chrVIIb:4011217-4015277(+) | protein_length=1235 | sequence_SO=chromosome | SO=protein_coding | is_pseudo=false	[R].SHFLQKLQERPR.[A]			61111.9							15.8992							-2.85548						-4.80573	-2.85548	-4.78115	-4.46877	-4.87127	-4.45295		-0.450212	-0.450212	0.83484
P13645	Keratin, type I cytoskeletal 10 OS=Homo sapiens OX=9606 GN=KRT10 PE=1 SV=6	[K].SKELTTEIDNNIEQISSYK.[S]			4.1669e+06	269206	57146.2		479648			21.9905	18.0384	15.8024		18.8716			3.2359	0.31803	-1.09407		1.87921		-4.88794	3.2359	0.31803	-1.09407	-4.78339	1.87921		-0.888077	-0.141331	0.518507
TGME49_237015-t26_1-p1	transcript=TGME49_237015-t26_1 | gene=TGME49_237015 | organism=Toxoplasma_gondii_ME49 | gene_product=hypothetical protein | transcript_product=hypothetical protein | location=TGME49_chrX:5673948-5674742(-) | protein_length=264 | sequence_SO=chromosome | SO=protein_coding | is_pseudo=false	[R].SGLDESTSTTSR.[Q]					75345.4		46144.4					16.2012		15.4939					-0.695205		-1.49854		-4.96194	-5.12604	-4.67079	-0.695205	-4.77992	-1.49854		2.59504	2.59504	2.53904
P35527	Keratin, type I cytoskeletal 9 OS=Homo sapiens OX=9606 GN=KRT9 PE=1 SV=3	[R].SGGGGGGGLGSGGSIR.[S]		6.93442e+06	3.28074e+07	7.80712e+06	7.27387e+06	9.90418e+06	1.62289e+07		22.7253	24.9675	22.8964	22.7943	23.2396	23.9521		5.51864	6.21287	5.17604	5.89785	6.76043	6.95966		5.51864	6.21287	5.17604	5.89785	6.76043	6.95966		0.903466	-0.363396	2.17627
P04264	Keratin, type II cytoskeletal 1 OS=Homo sapiens OX=9606 GN=KRT1 PE=1 SV=6	[K].SDQSRLDSELKNMQDMVEDYR.[N]	2xOxidation [M13		1.01902e+06	39536.9			228446			19.9588	15.2709			17.8015			1.20411	-2.44941			0.809092		-4.83542	1.20411	-2.44941	-4.45743	-4.74167	0.809092		-0.769762	-0.0837483	0.431184
Q6NZI2	Caveolae-associated protein 1 OS=Homo sapiens OX=9606 GN=CAVIN1 PE=1 SV=1	[K].SDQVNGVLVLSLLDK.[I]			268408	102658			32198.8			18.0341	16.6475			14.9747			-0.72058	-1.07283			-2.01768		-4.87502	-0.72058	-1.07283	-4.56652	-4.62479	-2.01768		-1.51352	-1.10579	4.72458
P13647	Keratin, type II cytoskeletal 5 OS=Homo sapiens OX=9606 GN=KRT5 PE=1 SV=3	[R].SFSTASAITPSVSR.[T]		294696	1.52508e+06	425912	509768	428149	1.09315e+06		18.1689	20.5405	18.7002	18.9595	18.7078	20.0601		0.962168	1.78581	0.979876	2.06305	2.22858	3.06766		0.962168	1.78581	0.979876	2.06305	2.22858	3.06766		1.21048	0.091607	0.259862
Q6NZI2	Caveolae-associated protein 1 OS=Homo sapiens OX=9606 GN=CAVIN1 PE=1 SV=1	[K].SFTPDHVVYAR.[S]		438079	901472	281495	80571.8	94109.9	187704		18.7408	19.7819	18.1027	16.298	16.5221	17.5181		1.53413	1.02728	0.382428	-0.598449	0.0428865	0.525696		1.53413	1.02728	0.382428	-0.598449	0.0428865	0.525696		-0.991234	-1.10579	4.72458
P02545	Prelamin-A/C OS=Homo sapiens OX=9606 GN=LMNA PE=1 SV=1	[R].SGAQASSTPLSPTR.[I]		144001	164757	63630.7	20342.6	30727.3	60994.9		17.1357	17.33	15.9574	14.3122	14.9072	15.8964		-0.0709846	-1.42466	-1.76289	-2.58422	-1.57194	-1.096		-0.0709846	-1.42466	-1.76289	-2.58422	-1.57194	-1.096		-0.664541	-0.90132	4.27226
TGME49_257680-t26_1-p1	transcript=TGME49_257680-t26_1 | gene=TGME49_257680 | organism=Toxoplasma_gondii_ME49 | gene_product=myosin light chain MLC1 | transcript_product=myosin light chain MLC1 | location=TGME49_chrVIIb:3911290-3913592(+) | protein_length=213 | sequence_SO=chromosome | SO=protein_coding | is_pseudo=false	[K].SGDNLDYASFQK.[F]		61762.2	107157	98805.7	42943.6				15.9144	16.7094	16.5923	15.3902				-1.29227	-2.04528	-1.12801	-1.50628				-1.29227	-2.04528	-1.12801	-1.50628	-4.72991	-4.58634		-2.11899	-1.14873	0.845503
TGME49_229670-t26_1-p1	transcript=TGME49_229670-t26_1 | gene=TGME49_229670 | organism=Toxoplasma_gondii_ME49 | gene_product=ribosomal protein RPS23 | transcript_product=ribosomal protein RPS23 | location=TGME49_chrVIII:371876-374724(+) | protein_length=143 | sequence_SO=chromosome | SO=protein_coding | is_pseudo=false	[R].SGHAVGDIPGVR.[F]		33175	46024.2	21804.2	17086.6	37991.6	32799.9		15.0178	15.4901	14.4123	14.0606	15.2134	15.0014		-2.1889	-3.26454	-3.308	-2.83586	-1.26578	-1.991		-2.1889	-3.26454	-3.308	-2.83586	-1.26578	-1.991		0.889599	0.576602	0.420975
Q04837	Single-stranded DNA-binding protein, mitochondrial OS=Homo sapiens OX=9606 GN=SSBP1 PE=1 SV=1	[R].SGDSEVYQLGDVSQK.[T]		85252.9	65866.7						16.3795	16.0073						-0.827241	-2.74738						-0.827241	-2.74738	-4.92275	-4.5769	-4.83866	-4.52766		-1.81528	-1.81528	1.92019
Q9BVP2	Guanine nucleotide-binding protein-like 3 OS=Homo sapiens OX=9606 GN=GNL3 PE=1 SV=2	[K].SGFNLEELEKNNAQSIR.[A]			658621	335429	93488.3		76042.7			19.3291	18.3556	16.5125		16.2145			0.574443	0.635325	-0.383938		-0.777881		-4.79917	0.574443	0.635325	-0.383938	-4.7236	-0.777881		-0.76534	-1.18236	2.65887
P04259	Keratin, type II cytoskeletal 6B OS=Homo sapiens OX=9606 GN=KRT6B PE=1 SV=5	[R].SGFSSISVSR.[S]		136150	2.09978e+06	260889	219179	500498	1.08096e+06		17.0548	21.0018	17.9931	17.7418	18.933	20.0439		-0.151864	2.24716	0.272754	0.845315	2.45383	3.05147		-0.151864	2.24716	0.272754	0.845315	2.45383	3.05147		1.32752	0.27429	0.873474
P02538	Keratin, type II cytoskeletal 6A OS=Homo sapiens OX=9606 GN=KRT6A PE=1 SV=3	[R].SGFSSVSVSR.[S]		140790	1.28849e+06	213362	173321	270523	771923		17.1032	20.2972	17.7029	17.4031	18.0454	19.5581		-0.103517	1.5426	-0.0173767	0.506651	1.56622	2.56569		-0.103517	1.5426	-0.0173767	0.506651	1.56622	2.56569		1.07229	1.01881	1.97096
P22061	Protein-L-isoaspartate(D-aspartate) O-methyltransferase OS=Homo sapiens OX=9606 GN=PCMT1 PE=1 SV=4	[K].SGGASHSELIHNLR.[K]		161202	574422	292510	130587	57412.3	58103.2		17.2985	19.1318	18.1581	16.9946	15.8091	15.8263		0.0918043	0.377105	0.437807	0.0982128	-0.670099	-1.16607		0.0918043	0.377105	0.437807	0.0982128	-0.670099	-1.16607		-0.881558	-0.592724	1.15139
P22061	Protein-L-isoaspartate(D-aspartate) O-methyltransferase OS=Homo sapiens OX=9606 GN=PCMT1 PE=1 SV=4	[K].SGGASHSELIHNLRK.[N]		1.51403e+06	1.69232e+06	734499	480275	653055	413100		20.53	20.6906	19.4864	18.8735	19.3168	18.6561		3.32326	1.93593	1.76608	1.97706	2.83767	1.66373		3.32326	1.93593	1.76608	1.97706	2.83767	1.66373		-0.182267	-0.592724	1.15139
P04264	Keratin, type II cytoskeletal 1 OS=Homo sapiens OX=9606 GN=KRT1 PE=1 SV=6	[R].SGGGFSSGSAGIINYQR.[R]		1.17906e+06	1.24417e+07	2.45508e+06	1.99864e+06	1226577	6.15016e+06		20.1692	23.5687	21.2273	20.9306	20.2262	22.5522		2.9625	4.81404	3.50702	4.03415	3.74703	5.55979		2.9625	4.81404	3.50702	4.03415	3.74703	5.55979		0.685805	-0.0837483	0.431184
P13647	Keratin, type II cytoskeletal 5 OS=Homo sapiens OX=9606 GN=KRT5 PE=1 SV=3	[R].SGGGGGGGFGR.[V]		188412	978287	223683	270777	170116	385593		17.5235	19.8999	17.7711	18.0467	17.3762	18.5567		0.316831	1.14525	0.0507727	1.15031	0.896983	1.56432		0.316831	1.14525	0.0507727	1.15031	0.896983	1.56432		0.699585	0.091607	0.259862
Q9BVP2	Guanine nucleotide-binding protein-like 3 OS=Homo sapiens OX=9606 GN=GNL3 PE=1 SV=2	[K].SGFNLEELEK.[N]			100224	68694						16.6129	16.0679						-2.14177	-1.65242					-4.94592	-2.14177	-1.65242	-4.44921	-4.70422	-4.6037		-1.67234	-1.18236	2.65887
TGME49_220240-t26_1-p1	transcript=TGME49_220240-t26_1 | gene=TGME49_220240 | organism=Toxoplasma_gondii_ME49 | gene_product=hypothetical protein | transcript_product=hypothetical protein | location=TGME49_chrV:238210-239790(-) | protein_length=526 | sequence_SO=chromosome | SO=protein_coding | is_pseudo=false	[R].SDLTRPSGSSDEASQVHGR.[Q]					39460							15.2681							-1.62833				-5.02018	-5.28591	-4.7059	-1.62833	-4.89499	-4.57079		1.30596	2.34328	1.56722
P08670	Vimentin OS=Homo sapiens OX=9606 GN=VIM PE=1 SV=4	[K].SKFADLSEAANR.[N]		47878.6	209075	68666.9	25581.8	18378.6	29404.1		15.5471	17.6737	16.0673	14.6428	14.1657	14.8437		-1.65961	-1.08098	-1.65299	-2.25361	-2.31343	-2.14867		-1.65961	-1.08098	-1.65299	-2.25361	-2.31343	-2.14867		-0.774041	-1.45396	18.1104
TGME49_239740-t26_1-p1	transcript=TGME49_239740-t26_1 | gene=TGME49_239740 | organism=Toxoplasma_gondii_ME49 | gene_product=dense granule protein GRA14 | transcript_product=dense granule protein GRA14 | location=TGME49_chrVI:883160-884386(-) | protein_length=408 | sequence_SO=chromosome | SO=protein_coding | is_pseudo=false	[R].SKGDVSTSDDMPR.[E]	1xOxidation [M11]				372818	312104						18.5081	18.2517						1.61168	1.77249			-4.94235	-5.17978	-4.83744	1.61168	1.77249	-4.65514		4.56287	5.93448	38.4972
P01040	Cystatin-A OS=Homo sapiens OX=9606 GN=CSTA PE=1 SV=1	[K].SLPGQNEDLVLTGYQVDK.[N]							45389.4							15.4701							-1.52234		-4.88498	-5.40684	-4.84404	-4.57099	-4.6388	-1.52234		1.46791	2.21071	3.22083
TGME49_239740-t26_1-p1	transcript=TGME49_239740-t26_1 | gene=TGME49_239740 | organism=Toxoplasma_gondii_ME49 | gene_product=dense granule protein GRA14 | transcript_product=dense granule protein GRA14 | location=TGME49_chrVI:883160-884386(-) | protein_length=408 | sequence_SO=chromosome | SO=protein_coding | is_pseudo=false	[R].SLQSTANGVKK.[I]					276377	156189	154663					18.0763	17.2529	17.2388					1.17984	0.773757	0.246369		-5.05063	-5.28966	-4.6779	1.17984	0.773757	0.246369		5.73938	5.93448	38.4972
P35908	Keratin, type II cytoskeletal 2 epidermal OS=Homo sapiens OX=9606 GN=KRT2 PE=1 SV=2	[K].SISISVAGGGGGFGAAGGFGGR.[G]		72198.7	3.63903e+06	531945	561037	101429	1.49848e+06		16.1397	21.7951	19.0209	19.0977	16.6301	20.5151		-1.06702	3.04048	1.3006	2.2013	0.150939	3.52267		-1.06702	3.04048	1.3006	2.2013	0.150939	3.52267		0.866952	0.181252	0.903762
P04264	Keratin, type II cytoskeletal 1 OS=Homo sapiens OX=9606 GN=KRT1 PE=1 SV=6	[R].SLVNLGGSKSISISVAR.[G]			973161	153429	270097		846062			19.8923	17.2272	18.0431		19.6904			1.13767	-0.493109	1.14668		2.698		-4.89819	1.13767	-0.493109	1.14668	-4.89544	2.698		1.06762	-0.0837483	0.431184
P08670	Vimentin OS=Homo sapiens OX=9606 GN=VIM PE=1 SV=4	[R].SLYASSPGGVYATR.[S]		880060	4445348	1.37674e+06	531458	251723	600850		19.7472	22.0839	20.3928	19.0196	17.9415	19.1966		2.54054	3.32922	2.6725	2.12316	1.46231	2.20424		2.54054	3.32922	2.6725	2.12316	1.46231	2.20424		-0.917516	-1.45396	18.1104
P62937	Peptidyl-prolyl cis-trans isomerase A OS=Homo sapiens OX=9606 GN=PPIA PE=1 SV=2	[K].SIYGEKFEDENFILK.[H]			121051	74164.3			14431.2			16.8853	16.1784			13.8169			-1.86939	-1.54188			-3.1755		-5.02455	-1.86939	-1.54188	-4.44234	-4.79397	-3.1755		-1.32533	-0.774637	1.04897
P35579	Myosin-9 OS=Homo sapiens OX=9606 GN=MYH9 PE=1 SV=4	[K].SMEAEMIQLQEELAAAER.[A]	2xOxidation [M2		6.52724e+06	2.19101e+06	166023	14860.6	387238			22.638	21.0632	17.341	13.8592	18.5629			3.8834	3.34284	0.44459	-2.61997	1.57046		-4.96958	3.8834	3.34284	0.44459	-2.61997	1.57046		-0.95386	-1.7311	75.0609
P61160	Actin-related protein 2 OS=Homo sapiens OX=9606 GN=ACTR2 PE=1 SV=1	[R].SMLEVNYPMENGIVR.[N]	2xOxidation [M2		114416	49553.5						16.8039	15.5967						-1.95072	-2.12362					-4.94127	-1.95072	-2.12362	-4.52932	-4.74846	-4.436		-1.56606	-1.12844	0.831126
P35579	Myosin-9 OS=Homo sapiens OX=9606 GN=MYH9 PE=1 SV=4	[R].SMMQDREDQSILCTGESGAGKTENTK.[K]	1xCarbamidomethyl [C13]		126386	19106.9						16.9475	14.2218						-1.80717	-3.49851					-5.04921	-1.80717	-3.49851	-4.68907	-4.63986	-4.6811		-1.21838	-1.7311	75.0609
P35579	Myosin-9 OS=Homo sapiens OX=9606 GN=MYH9 PE=1 SV=4	[R].SMMQDREDQSILCTGESGAGKTENTK.[K]	1xCarbamidomethyl [C13]		232582	99267.1			9457.12			17.8274	16.599			13.2072			-0.927263	-1.12129			-3.78522		-4.81718	-0.927263	-1.12129	-4.45256	-4.87771	-3.78522		-2.08325	-1.7311	75.0609
P61254	60S ribosomal protein L26 OS=Homo sapiens OX=9606 GN=RPL26 PE=1 SV=1 60S ribosomal protein L26-like 1 OS=Homo sapiens OX=9606 GN=RPL26L1 PE=1 SV=1	[R].SMPIRKDDEVQVVR.[G]	1xOxidation [M2]	365364	542299	533033	141655	249551	348971		18.479	19.0487	19.0239	17.112	17.929	18.4127		1.27227	0.294084	1.30355	0.21559	1.4498	1.42034		1.27227	0.294084	1.30355	0.21559	1.4498	1.42034		0.0719449	-0.687735	2.38245
TGME49_270250-t26_1-p1	transcript=TGME49_270250-t26_1 | gene=TGME49_270250 | organism=Toxoplasma_gondii_ME49 | gene_product=dense granule protein GRA1 | transcript_product=dense granule protein GRA1 | location=TGME49_chrVIII:5310153-5310860(-) | protein_length=190 | sequence_SO=chromosome | SO=protein_coding | is_pseudo=false	[K].SMQRDEEIFFR.[A]	1xOxidation [M2]				3.06608e+06	230754	4006974					21.548	17.816	21.9341					4.65153	1.33683	4.94168		-4.86236	-5.26534	-4.91001	4.65153	1.33683	4.94168		8.65591	5.87075	10.4661
Q8WWI1	LIM domain only protein 7 OS=Homo sapiens OX=9606 GN=LMO7 PE=1 SV=3	[K].SMSDVSAEDVQNLR.[Q]			88866.6	29445.2						16.4394	14.8457						-2.31529	-2.87457					-4.83078	-2.31529	-2.87457	-4.64456	-4.86575	-4.5371		-1.34225	-1.67673	4.00167
P22695	Cytochrome b-c1 complex subunit 2, mitochondrial OS=Homo sapiens OX=9606 GN=UQCRC2 PE=1 SV=3	[K].SMAASGNLGHTPFVDEL.[-]	1xOxidation [M2]		114038	57373.1			26126.4			16.7992	15.8081			14.6732			-1.95549	-1.91224			-2.31918		-5.04652	-1.95549	-1.91224	-4.53762	-4.76645	-2.31918		-0.903003	-0.460405	0.33269
TGME49_239740-t26_1-p1	transcript=TGME49_239740-t26_1 | gene=TGME49_239740 | organism=Toxoplasma_gondii_ME49 | gene_product=dense granule protein GRA14 | transcript_product=dense granule protein GRA14 | location=TGME49_chrVI:883160-884386(-) | protein_length=408 | sequence_SO=chromosome | SO=protein_coding | is_pseudo=false	[R].SKGDVSTSDDMPR.[E]					142655	35534.8	147821					17.1222	15.1169	17.1735					0.225733	-1.36223	0.181088		-4.80107	-5.1255	-4.78051	0.225733	-1.36223	0.181088		4.58389	5.93448	38.4972
P04264	Keratin, type II cytoskeletal 1 OS=Homo sapiens OX=9606 GN=KRT1 PE=1 SV=6	[K].SLNNQFASFIDKVR.[F]			19176665	636274	402886	12653.1	1.77545e+06			24.1928	19.2793	18.62	13.6272	20.7597			5.4382	1.55897	1.72358	-2.85197	3.76735		-4.96742	5.4382	1.55897	1.72358	-2.85197	3.76735		0.20307	-0.0837483	0.431184
Q07065	Cytoskeleton-associated protein 4 OS=Homo sapiens OX=9606 GN=CKAP4 PE=1 SV=2	[K].SINDNIAIFTEVQKR.[S]		32148.7	330203	62004.8	48652.7		60065.4		14.9725	18.333	15.9201	15.5702		15.8742		-2.23423	-0.421651	-1.80023	-1.3262		-1.11816		-2.23423	-0.421651	-1.80023	-1.3262	-4.88075	-1.11816		-0.956332	0.114884	0.322937
TGME49_239740-t26_1-p1	transcript=TGME49_239740-t26_1 | gene=TGME49_239740 | organism=Toxoplasma_gondii_ME49 | gene_product=dense granule protein GRA14 | transcript_product=dense granule protein GRA14 | location=TGME49_chrVI:883160-884386(-) | protein_length=408 | sequence_SO=chromosome | SO=protein_coding | is_pseudo=false	[R].SKGDVSTSDDMPREPPPPYVPPMYPFAEPEHR.[W]	2xOxidation [M11				319372		338903					18.2849		18.3705					1.38844		1.37811		-5.03594	-5.16174	-4.86366	1.38844	-4.67151	1.37811		4.38547	5.93448	38.4972
P62277	40S ribosomal protein S13 OS=Homo sapiens OX=9606 GN=RPS13 PE=1 SV=2	[K].SKGLAPDLPEDLYHLIK.[K]			45267.6							15.4662							-3.28845						-4.89541	-3.28845	-4.76784	-4.50854	-4.77729	-4.61748		-0.317205	-0.541708	1.13284
P35579	Myosin-9 OS=Homo sapiens OX=9606 GN=MYH9 PE=1 SV=4	[K].SKKDQGELER.[Q]		7.35947e+06	5.48832e+06	5.07335e+06	6231441	5697451	3.79779e+06		22.8112	22.3879	22.2745	22.5711	22.4419	21.8567		5.60447	3.63329	4.55419	5.6747	5.96271	4.86433		5.60447	3.63329	4.55419	5.6747	5.96271	4.86433		0.903265	-1.7311	75.0609
P09493	Tropomyosin alpha-1 chain OS=Homo sapiens OX=9606 GN=TPM1 PE=1 SV=2	[R].SKQLEDELVSLQK.[K]		19149	2.02842e+06	621640	105073	48566.7	221736		14.225	20.9519	19.2457	16.681	15.5677	17.7585		-2.98172	2.19728	1.5254	-0.215398	-0.911492	0.766082		-2.98172	2.19728	1.5254	-0.215398	-0.911492	0.766082		-0.367255	-0.922806	4.58781
P09493	Tropomyosin alpha-1 chain OS=Homo sapiens OX=9606 GN=TPM1 PE=1 SV=2	[R].SKQLEDELVSLQKK.[L]			552786	269244		17987				19.0764	18.0386		14.1347				0.321717	0.318234		-2.34451			-4.83629	0.321717	0.318234	-4.40692	-2.34451	-4.541		-2.36536	-0.922806	4.58781
TGME49_258870-t26_1-p1	transcript=TGME49_258870-t26_1 | gene=TGME49_258870 | organism=Toxoplasma_gondii_ME49 | gene_product=hypothetical protein | transcript_product=hypothetical protein | location=TGME49_chrVIIb:3113941-3118623(-) | protein_length=916 | sequence_SO=chromosome | SO=protein_coding | is_pseudo=false	[R].SLAEEPLDGQQAAAR.[E]					59394.5	27352.7	20695.8					15.858	14.7394	14.337					-1.0384	-1.73978	-2.65535		-5.04275	-5.26257	-4.75766	-1.0384	-1.73978	-2.65535		3.20982	2.83067	4.01774
Q9H9H4	Vacuolar protein sorting-associated protein 37B OS=Homo sapiens OX=9606 GN=VPS37B PE=1 SV=1	[R].SLAEGNLLYQPQLDTLK.[A]					88096		75119.4					16.4268		16.1969					-0.469648		-0.795505		-4.87939	-5.17199	-4.837	-0.469648	-4.8271	-0.795505		2.93204	2.93204	2.54956
P04264	Keratin, type II cytoskeletal 1 OS=Homo sapiens OX=9606 GN=KRT1 PE=1 SV=6	[K].SLNNQFASFIDK.[V]		48176.7	15253787	1.81406e+06	163753	57453	690904		15.556	23.8627	20.7908	17.3212	15.8101	19.3981		-1.65066	5.10802	3.07047	0.424724	-0.669079	2.40572		-1.65066	5.10802	3.07047	0.424724	-0.669079	2.40572		-1.45549	-0.0837483	0.431184
P29692	Elongation factor 1-delta OS=Homo sapiens OX=9606 GN=EEF1D PE=1 SV=5	[K].SLAGSSGPGASSGTSGDHGELVVR.[I]			24655.6	12916.7			10980.4			14.5896	13.6569			13.4226			-4.16502	-4.06337			-3.56977		-4.97212	-4.16502	-4.06337	-4.54928	-4.65034	-3.56977		0.143711	-0.150497	0.103911
Q99584	Protein S100-A13 OS=Homo sapiens OX=9606 GN=S100A13 PE=1 SV=1	[K].SLDVNQDSELK.[F]		1.51046e+06	3.95734e+06	2.10649e+06	1.36913e+06	1.13334e+06	1142037		20.5266	21.9161	21.0064	20.3848	20.1121	20.1232		3.31985	3.16145	3.28609	3.48839	3.63297	3.13078		3.31985	3.16145	3.28609	3.48839	3.63297	3.13078		0.161581	-0.0791847	0.113531
P31944	Caspase-14 OS=Homo sapiens OX=9606 GN=CASP14 PE=1 SV=2	[R].SLEEEKYDMSGAR.[L]	1xOxidation [M9]		49540.3		25232.6	51246.2	27099.2			15.5963		14.623	15.6452	14.726			-3.15833		-2.27343	-0.834014	-2.26644		-4.91639	-3.15833	-4.69485	-2.27343	-0.834014	-2.26644		2.46523	1.51805	2.68598
Q86V81	THO complex subunit 4 OS=Homo sapiens OX=9606 GN=ALYREF PE=1 SV=3	[R].SLGTADVHFER.[K]		145271	95892.3	35104.4	42913.2	127582	76667.6		17.1484	16.5491	15.0994	15.3891	16.9611	16.2263		-0.058313	-2.20552	-2.62095	-1.5073	0.481893	-0.766073		-0.058313	-2.20552	-2.62095	-1.5073	0.481893	-0.766073		1.0311	1.0311	1.47921
P13645	Keratin, type I cytoskeletal 10 OS=Homo sapiens OX=9606 GN=KRT10 PE=1 SV=6	[R].SLLEGEGSSGGGGR.[G]		846208	1.00999e+07	1.4749e+06	1.28957e+06	1.71179e+06	1.87669e+06		19.6907	23.2678	20.4922	20.2985	20.7071	20.8398		2.48395	4.51319	2.77187	3.40202	4.2279	3.84736		2.48395	4.51319	2.77187	3.40202	4.2279	3.84736		0.569426	-0.141331	0.518507
P31151	Protein S100-A7 OS=Homo sapiens OX=9606 GN=S100A7 PE=1 SV=4	[R].SIIGMIDMFHK.[Y]	2xOxidation [M5	48158.3	256152	82185.7	44041.7	100699	355427		15.5555	17.9666	16.3266	15.4266	16.6197	18.4392		-1.65121	-0.788006	-1.39372	-1.46985	0.140512	1.44679		-1.65121	-0.788006	-1.39372	-1.46985	0.140512	1.44679		1.31679	1.42912	1.03712
Q9BRT6	Protein LLP homolog OS=Homo sapiens OX=9606 GN=LLPH PE=1 SV=1	[K].SILKLDGDVLMK.[D]	1xOxidation [M11]	195109	1.29462e+06	449644	250426	100347	253110		17.5739	20.3041	18.7784	17.934	16.6146	17.9494		0.367218	1.54946	1.0581	1.03759	0.135466	0.957002		0.367218	1.54946	1.0581	1.03759	0.135466	0.957002		-0.281573	-0.790296	1.45553
O75340	Programmed cell death protein 6 OS=Homo sapiens OX=9606 GN=PDCD6 PE=1 SV=1	[R].SIISMFDRENK.[A]	1xOxidation [M5]				7.73076e+06	1.66874e+06	3.71994e+06					22.8822	20.6703	21.8268					5.98574	4.19116	4.83445		-4.83855	-5.25128	-4.89441	5.98574	4.19116	4.83445		9.99853	5.79024	17.3889
P04264	Keratin, type II cytoskeletal 1 OS=Homo sapiens OX=9606 GN=KRT1 PE=1 SV=6	[R].SLDLDSIIAEVK.[A]		510856	1.08486e+08	5.16824e+06	4.07702e+06	327530	1.00195e+07		18.9626	26.6929	22.3012	21.9591	18.3213	23.2563		1.75585	7.93829	4.58092	5.06265	1.8421	6.2639		1.75585	7.93829	4.58092	5.06265	1.8421	6.2639		-0.368808	-0.0837483	0.431184
Q08188	Protein-glutamine gamma-glutamyltransferase E OS=Homo sapiens OX=9606 GN=TGM3 PE=1 SV=4	[R].SDLGPSYGGWQVLDATPQER.[S]			54689.7							15.739							-3.01566						-5.06825	-3.01566	-4.85385	-4.4196	-4.64826	-4.59785		-0.242649	-0.29331	0.410136
TGME49_203310-t26_1-p1	transcript=TGME49_203310-t26_1 | gene=TGME49_203310 | organism=Toxoplasma_gondii_ME49 | gene_product=dense granule protein GRA7 | transcript_product=dense granule protein GRA7 | location=TGME49_chrVIIa:2604424-2605134(+) | protein_length=236 | sequence_SO=chromosome | SO=protein_coding | is_pseudo=false	[R].SDAEVTDDNIYEEHTDRK.[V]			21751.2		310769	91199.9	185452			14.4088		18.2455	16.4767	17.5007			-4.34584		1.34905	-0.00242835	0.508281		-4.92202	-4.34584	-4.90004	1.34905	-0.00242835	0.508281		5.34093	3.58578	18.7485
TGME49_203310-t26_1-p1	transcript=TGME49_203310-t26_1 | gene=TGME49_203310 | organism=Toxoplasma_gondii_ME49 | gene_product=dense granule protein GRA7 | transcript_product=dense granule protein GRA7 | location=TGME49_chrVIIa:2604424-2605134(+) | protein_length=236 | sequence_SO=chromosome | SO=protein_coding | is_pseudo=false	[R].SDAEVTDDNIYEEHTDR.[K]			24258.4		649164	129424	256102			14.5662		19.3082	16.9818	17.9664			-4.18845		2.41179	0.502578	0.97396		-4.92635	-4.18845	-4.70435	2.41179	0.502578	0.97396		5.90249	3.58578	18.7485
P11142	Heat shock cognate 71 kDa protein OS=Homo sapiens OX=9606 GN=HSPA8 PE=1 SV=1	[R].RFDDAVVQSDMK.[H]	1xOxidation [M11]		53083.6	18779.9						15.696	14.1969						-3.05867	-3.52342					-4.82918	-3.05867	-3.52342	-4.58539	-4.80376	-4.5391		-0.838993	-0.279499	0.522606
P62861	40S ribosomal protein S30 OS=Homo sapiens OX=9606 GN=FAU PE=1 SV=1	[R].RFVNVVPTFGK.[K]		164658	771634	295364	597557	75879.1	158523		17.3291	19.5576	18.1721	19.1887	16.2114	17.2743		0.122414	0.802913	0.451811	2.29228	-0.267757	0.281929		0.122414	0.802913	0.451811	2.29228	-0.267757	0.281929		0.309772	-0.0923095	0.104299
Q05682	Caldesmon OS=Homo sapiens OX=9606 GN=CALD1 PE=1 SV=3	[R].RGETESEEFEKLK.[Q]			47896.1	18827.8			14850.6			15.5476	14.2006			13.8582			-3.20703	-3.51975			-3.13417		-4.93188	-3.20703	-3.51975	-4.54956	-4.83405	-3.13417		-0.286372	-0.394802	0.713066
TGME49_239740-t26_1-p1	transcript=TGME49_239740-t26_1 | gene=TGME49_239740 | organism=Toxoplasma_gondii_ME49 | gene_product=dense granule protein GRA14 | transcript_product=dense granule protein GRA14 | location=TGME49_chrVI:883160-884386(-) | protein_length=408 | sequence_SO=chromosome | SO=protein_coding | is_pseudo=false	[R].RGGGGDSGDFGEEGR.[S]					1.17633e+06	683890	640536					20.1659	19.3834	19.2889					3.26943	2.90423	2.29652		-5.06394	-5.18819	-4.90899	3.26943	2.90423	2.29652		7.8771	5.93448	38.4972
Q9Y6C2	EMILIN-1 OS=Homo sapiens OX=9606 GN=EMILIN1 PE=1 SV=3	[R].RGTELGGAAGQGGHPPGYTSLASR.[L]		154143	126351	50975.3	8292.89		17562.5		17.2339	16.9471	15.6375	13.0177		14.1002		0.0272034	-1.80757	-2.08281	-3.87878		-2.89219		0.0272034	-1.80757	-2.08281	-3.87878	-4.73486	-2.89219		-2.54755	-1.37014	6.27959
P35580	Myosin-10 OS=Homo sapiens OX=9606 GN=MYH10 PE=1 SV=3	[R].RHAEQERDELADEITNSASGK.[S]			1221363	364008			64117.5			20.2201	18.4736			15.9684			1.46542	0.753292			-1.02397		-5.07728	1.46542	0.753292	-4.56488	-4.78155	-1.02397		-2.50394	-1.95045	59.9637
P35579	Myosin-9 OS=Homo sapiens OX=9606 GN=MYH9 PE=1 SV=4	[K].RHEMPPHIYAITDTAYR.[S]	1xOxidation [M4]		1.1745e+06	413795	10910.2		92116.9			20.1636	18.6586	13.4134		16.4912			1.40896	0.938237	-3.48304		-0.501225		-5.03481	1.40896	0.938237	-3.48304	-4.66444	-0.501225		-1.98703	-1.7311	75.0609
TGME49_203310-t26_1-p1	transcript=TGME49_203310-t26_1 | gene=TGME49_203310 | organism=Toxoplasma_gondii_ME49 | gene_product=dense granule protein GRA7 | transcript_product=dense granule protein GRA7 | location=TGME49_chrVIIa:2604424-2605134(+) | protein_length=236 | sequence_SO=chromosome | SO=protein_coding | is_pseudo=false	[R].REPLETEPDEQEEVHFR.[K]					1.63352e+06		1.22985e+06					20.6396		20.2301					3.74311		3.23765		-4.82828	-5.19773	-4.84564	3.74311	-4.87265	3.23765		5.65992	3.58578	18.7485
P02768	Serum albumin OS=Homo sapiens OX=9606 GN=ALB PE=1 SV=2	[R].RHPDYSVVLLLR.[L]		40987.8	74671.6	52689.6	49732.5	28085.5	44222.7		15.3229	16.1883	15.6852	15.6019	14.7775	15.4325		-1.8838	-2.56637	-2.03509	-1.29454	-1.70163	-1.5599		-1.8838	-2.56637	-2.03509	-1.29454	-1.70163	-1.5599		0.643062	0.712437	0.953818
O00488	Zinc finger protein 593 OS=Homo sapiens OX=9606 GN=ZNF593 PE=1 SV=2	[R].RLAVPTEVSTEVPEMDTST.[-]	1xOxidation [M15]	62375.5	142768	81426.1	91077.8	30090.6	36279.8		15.9287	17.1233	16.3132	16.4748	14.877	15.1469		-1.27801	-1.63133	-1.40712	-0.421624	-1.60215	-1.84552		-1.27801	-1.63133	-1.40712	-0.421624	-1.60215	-1.84552		0.149054	-0.6042	1.05772
TGME49_250710-t26_1-p1	transcript=TGME49_250710-t26_1 | gene=TGME49_250710 | organism=Toxoplasma_gondii_ME49 | gene_product=microneme protein MIC10 | transcript_product=microneme protein MIC10 | location=TGME49_chrXII:5143982-5144578(+) | protein_length=198 | sequence_SO=chromosome | SO=protein_coding | is_pseudo=false	[K].RIDEQQANYEQR.[Q]			89548.2			22697.3				16.4504			14.4702				-2.30427			-2.00894			-4.88991	-2.30427	-4.9557	-4.52291	-2.00894	-4.65293		0.321701	0.152496	0.145176
Q9Y6C2	EMILIN-1 OS=Homo sapiens OX=9606 GN=EMILIN1 PE=1 SV=3	[R].RLDVVAGSVTVLSGR.[R]		39623.6	263384						15.2741	18.0068						-1.93263	-0.747838						-1.93263	-0.747838	-4.67812	-4.42024	-4.87643	-4.48382		-2.14064	-1.37014	6.27959
P02533	Keratin, type I cytoskeletal 14 OS=Homo sapiens OX=9606 GN=KRT14 PE=1 SV=4	[R].RLLEGEDAHLSSSQFSSGSQSSR.[D]			448356			33490.5				18.7743			15.0315				0.0196414			-1.44771			-5.01669	0.0196414	-4.68193	-4.67555	-1.44771	-4.62883		-0.3577	0.0182555	0.0639849
P42766	60S ribosomal protein L35 OS=Homo sapiens OX=9606 GN=RPL35 PE=1 SV=2	[R].RLNKHEENLK.[T]		4.23795e+06	1.40775e+07	5.47574e+06	2.53499e+06	2.27658e+06	1.9325e+06		22.0149	23.7469	22.3846	21.2735	21.1184	20.882		4.80823	4.99225	4.6643	4.37711	4.63927	3.88964		4.80823	4.99225	4.6643	4.37711	4.63927	3.88964		-0.519589	-0.538575	1.2191
P67936	Tropomyosin alpha-4 chain OS=Homo sapiens OX=9606 GN=TPM4 PE=1 SV=3 Tropomyosin alpha-1 chain OS=Homo sapiens OX=9606 GN=TPM1 PE=1 SV=2 Tropomyosin beta chain OS=Homo sapiens OX=9606 GN=TPM2 PE=1 SV=1 Tropomyosin alpha-3 chain OS=Homo sapiens OX=9606 GN=TPM3 PE=1 SV=2	[R].RIQLVEEELDR.[A]		23513.3	2.63242e+06	699235	50448.7	20482.2	268952		14.5212	21.328	19.4154	15.6225	14.3221	18.037		-2.68552	2.57331	1.6951	-1.27391	-2.15709	1.04459		-2.68552	2.57331	1.6951	-1.27391	-2.15709	1.04459		-1.3231	-1.11715	10.5206
P67936	Tropomyosin alpha-4 chain OS=Homo sapiens OX=9606 GN=TPM4 PE=1 SV=3 Tropomyosin alpha-1 chain OS=Homo sapiens OX=9606 GN=TPM1 PE=1 SV=2 Tropomyosin beta chain OS=Homo sapiens OX=9606 GN=TPM2 PE=1 SV=1 Tropomyosin alpha-3 chain OS=Homo sapiens OX=9606 GN=TPM3 PE=1 SV=2	[R].RIQLVEEELDRAQER.[L]		140177	3.76955e+07	8806041	1.68905e+06	71602.2	5.15715e+06		17.0969	25.1679	23.0701	20.6878	16.1277	22.2981		-0.109816	6.41324	5.34974	3.79134	-0.351455	5.30574		-0.109816	6.41324	5.34974	3.79134	-0.351455	5.30574		-0.969181	-1.11715	10.5206
P67936	Tropomyosin alpha-4 chain OS=Homo sapiens OX=9606 GN=TPM4 PE=1 SV=3	[K].RKIQALQQQADEAEDR.[A]			123697	22637.9						16.9165	14.4665						-1.83819	-3.25387					-4.83812	-1.83819	-3.25387	-4.4551	-4.63265	-4.45166		-1.20308	-1.11715	10.5206
P62805	Histone H4 OS=Homo sapiens OX=9606 GN=HIST1H4A PE=1 SV=2	[K].RISGLIYEETR.[G]		805779	1.18789e+06	255225		16442	170004		19.62	20.18	17.9614		14.0051	17.3752		2.41332	1.42532	0.241087		-2.47408	0.382807		2.41332	1.42532	0.241087	-4.52535	-2.47408	0.382807		-3.56545	-1.9663	8.7918
P67936	Tropomyosin alpha-4 chain OS=Homo sapiens OX=9606 GN=TPM4 PE=1 SV=3	[R].REKAEGDVAALNR.[R]		50012.5	1.13449e+06	382895	110805				15.61	20.1136	18.5466	16.7577				-1.5967	1.35897	0.826269	-0.138777				-1.5967	1.35897	0.826269	-0.138777	-4.71133	-4.67272		-3.37045	-1.11715	10.5206
Q8N1N4	Keratin, type II cytoskeletal 78 OS=Homo sapiens OX=9606 GN=KRT78 PE=1 SV=2	[R].RATLENDFVVLKK.[D]			88004.7							16.4253							-2.32935						-4.94076	-2.32935	-4.75402	-4.43936	-4.61078	-4.63889		-0.554964	-0.330554	0.526944
P08779	Keratin, type I cytoskeletal 16 OS=Homo sapiens OX=9606 GN=KRT16 PE=1 SV=4	[R].QTVEADVNGLR.[R]			502454	49938.4		230121	48661.9			18.9386	15.6079		17.812	15.5705			0.183987	-2.11246		1.33286	-1.4219		-4.98292	0.183987	-2.11246	-4.48109	1.33286	-1.4219		0.780422	0.289347	0.93167
Q8NEZ2	Vacuolar protein sorting-associated protein 37A OS=Homo sapiens OX=9606 GN=VPS37A PE=1 SV=1	[R].QTVLDKYELLTQMK.[S]	1xOxidation [M13]				180683		118617					17.4631		16.8559					0.566663		-0.136456		-4.93876	-5.34458	-4.89351	0.566663	-4.61705	-0.136456		3.66334	3.73092	7.5573
P01023	Alpha-2-macroglobulin OS=Homo sapiens OX=9606 GN=A2M PE=1 SV=3	[R].QTVSWAVTPK.[S]		75986.9	407265	202149	186364	107095	313108		16.2135	18.6356	17.6251	17.5078	16.7085	18.2563		-0.99324	-0.119038	-0.0952629	0.61133	0.229361	1.2639		-0.99324	-0.119038	-0.0952629	0.61133	0.229361	1.2639		1.10404	1.10404	4.0769
P08670	Vimentin OS=Homo sapiens OX=9606 GN=VIM PE=1 SV=4	[R].QVDQLTNDKAR.[V]		188108	1.03127e+06	278228	68764.4		90584.6		17.5212	19.976	18.0859	16.0694		16.467		0.314499	1.22134	0.365588	-0.827062		-0.525423		0.314499	1.22134	0.365588	-0.827062	-4.69685	-0.525423		-2.65026	-1.45396	18.1104
Q16778	Histone H2B type 2-E OS=Homo sapiens OX=9606 GN=HIST2H2BE PE=1 SV=3 Histone H2B type 2-F OS=Homo sapiens OX=9606 GN=HIST2H2BF PE=1 SV=3	[K].QVHPDTGISSK.[A]		2.32961e+07	1.0538e+07	2.86068e+06	900013	1.24718e+06	1.92823e+06		24.4736	23.3291	21.4479	19.7796	20.2502	20.8788		7.26688	4.57445	3.72761	2.88315	3.77107	3.88644		7.26688	4.57445	3.72761	2.88315	3.77107	3.88644		-1.6761	-1.9726	4.78881
P35580	Myosin-10 OS=Homo sapiens OX=9606 GN=MYH10 PE=1 SV=3	[K].QVLALQSQLADTK.[K]		181024	3.309e+06	1.32604e+06	96013.1	101714	230635		17.4658	21.658	20.3387	16.5509	16.6342	17.8153		0.259121	2.90332	2.61837	-0.345492	0.154991	0.822853		0.259121	2.90332	2.61837	-0.345492	0.154991	0.822853		-1.71615	-1.95045	59.9637
P35580	Myosin-10 OS=Homo sapiens OX=9606 GN=MYH10 PE=1 SV=3	[K].QVLALQSQLADTKK.[K]		79411.9	1.81279e+06	558254	25382.9	54822.6	101667		16.2771	20.7898	19.0906	14.6316	15.7425	16.6335		-0.929636	2.03513	1.37024	-2.26487	-0.736688	-0.358914		-0.929636	2.03513	1.37024	-2.26487	-0.736688	-0.358914		-1.9454	-1.95045	59.9637
P08708	40S ribosomal protein S17 OS=Homo sapiens OX=9606 GN=RPS17 PE=1 SV=2	[R].RDNYVPEVSALDQEIIEVDPDTKEMLK.[L]	1xOxidation [M25]		209061	27671.4						17.6736	14.7561						-1.08108	-2.96421					-4.79118	-1.08108	-2.96421	-4.6223	-4.62483	-4.50858		-1.63974	-1.23491	4.32648
P35527	Keratin, type I cytoskeletal 9 OS=Homo sapiens OX=9606 GN=KRT9 PE=1 SV=3	[R].QVLDNLTMEK.[S]			2343682	380027	22824.3		151415			21.1603	18.5357	14.4783		17.2081			2.4057	0.81542	-2.41816		0.215743		-4.86814	2.4057	0.81542	-2.41816	-4.76675	0.215743		-1.77405	-0.363396	2.17627
Q08554	Desmocollin-1 OS=Homo sapiens OX=9606 GN=DSC1 PE=1 SV=2	[R].QVILQVGVINEAQFSK.[A]			97746	38344.5			64601.4			16.5767	15.2267			15.9793			-2.1779	-2.49359			-1.01312		-4.8738	-2.1779	-2.49359	-4.64117	-4.89537	-1.01312		-0.334793	1.22257	2.44456
Q14574	Desmocollin-3 OS=Homo sapiens OX=9606 GN=DSC3 PE=1 SV=3	[R].QVNLEIGVNNEAPFAR.[D]			60988.3				72910			15.8962				16.1538			-2.8584				-0.838573		-4.8289	-2.8584	-4.93791	-4.45938	-4.75045	-0.838573		0.858934	0.849653	0.92223
P08670	Vimentin OS=Homo sapiens OX=9606 GN=VIM PE=1 SV=4	[R].QVQSLTCEVDALK.[G]	1xCarbamidomethyl [C7]		195380	53069.4			29885.5			17.5759	15.6956			14.8672			-1.17872	-2.02473			-2.12525		-4.80047	-1.17872	-2.02473	-4.66054	-4.60991	-2.12525		-1.13059	-1.45396	18.1104
P08670	Vimentin OS=Homo sapiens OX=9606 GN=VIM PE=1 SV=4	[R].QVQSLTCEVDALKGTNESLER.[Q]	1xCarbamidomethyl [C7]		555875	152542			77860.4			19.0844	17.2188			16.2486			0.329756	-0.501473			-0.743799		-5.03416	0.329756	-0.501473	-4.46206	-4.85025	-0.743799		-1.61674	-1.45396	18.1104
P02751	Fibronectin OS=Homo sapiens OX=9606 GN=FN1 PE=1 SV=4	[R].QYNVGPSVSKYPLR.[N]		90143.3	118783	24196			16695.9		16.4599	16.858	14.5625			14.0272		-0.74677	-1.89668	-3.15784			-2.9652		-0.74677	-1.89668	-3.15784	-4.51519	-4.73223	-2.9652		-2.13711	-1.69425	11.343
P07355	Annexin A2 OS=Homo sapiens OX=9606 GN=ANXA2 PE=1 SV=2	[R].RAEDGSVIDYELIDQDAR.[D]			159458				29041.7			17.2828				14.8258			-1.47183				-2.16656		-4.86321	-1.47183	-4.87622	-4.50655	-4.67859	-2.16656		-0.0468146	-0.226677	0.443687
P62269	40S ribosomal protein S18 OS=Homo sapiens OX=9606 GN=RPS18 PE=1 SV=3	[K].RAGELTEDEVER.[V]		178707	942620	360862	101777	126809	163489		17.4472	19.8463	18.4611	16.6351	16.9523	17.3188		0.240534	1.09167	0.740767	-0.261377	0.473125	0.326429		0.240534	1.09167	0.740767	-0.261377	0.473125	0.326429		-0.511599	-0.612376	1.94788
P35527	Keratin, type I cytoskeletal 9 OS=Homo sapiens OX=9606 GN=KRT9 PE=1 SV=3	[R].QVLDNLTMEK.[S]	1xOxidation [M8]	224224	5.24135e+06	638504	182302	473220	600995		17.7746	22.3215	19.2843	17.476	18.8521	19.197		0.567881	3.56686	1.56401	0.579534	2.37298	2.20459		0.567881	3.56686	1.56401	0.579534	2.37298	2.20459		-0.180551	-0.363396	2.17627
P21333	Filamin-A OS=Homo sapiens OX=9606 GN=FLNA PE=1 SV=4	[R].RLTVSSLQESGLK.[V]			122003	61623		15043.2				16.8966	15.9112		13.8768				-1.85808	-1.80914		-2.60235			-4.93553	-1.85808	-1.80914	-4.4141	-2.60235	-4.63748		-1.01706	-0.801463	6.54648
P07305	Histone H1.0 OS=Homo sapiens OX=9606 GN=H1F0 PE=1 SV=3	[K].RLVTTGVLK.[Q]		1.18017e+07	23090154	9.95055e+06	3.59799e+06	4498667	4.57892e+06		23.4925	24.4608	23.2463	21.7788	22.1011	22.1266		6.28579	5.70613	5.52602	4.88232	5.62189	5.13418		6.28579	5.70613	5.52602	4.88232	5.62189	5.13418		-0.626516	-0.798558	2.45748
P63220	40S ribosomal protein S21 OS=Homo sapiens OX=9606 GN=RPS21 PE=1 SV=1	[R].RMGESDDSILR.[L]	1xOxidation [M2]	170333	115405	111067	114170	113101	115616		17.378	16.8163	16.7611	16.8008	16.7873	16.819		0.171298	-1.9383	-0.959247	-0.0956118	0.30808	-0.173425		0.171298	-1.9383	-0.959247	-0.0956118	0.30808	-0.173425		0.921764	0.589821	1.02806
TGME49_275470-t26_1-p1	transcript=TGME49_275470-t26_1 | gene=TGME49_275470 | organism=Toxoplasma_gondii_ME49 | gene_product=dense granule protein GRA15 | transcript_product=dense granule protein GRA15 | location=TGME49_chrX:7287059-7288711(+) | protein_length=550 | sequence_SO=chromosome | SO=protein_coding | is_pseudo=false	[R].SAAAAPTVETVPR.[V]		10663.4	20141.5	12385.7	300334	152687	175287		13.3804	14.2979	13.5964	18.1962	17.2202	17.4194		-3.82632	-4.45676	-4.12393	1.29977	0.741041	0.426961		-3.82632	-4.45676	-4.12393	1.29977	0.741041	0.426961		4.95826	4.44009	12.9114
P21333	Filamin-A OS=Homo sapiens OX=9606 GN=FLNA PE=1 SV=4	[K].SADFVVEAIGDDVGTLGFSVEGPSQAK.[I]		49542.2	31965.9	34272.7	29296.6	27872.9	22770		15.5964	14.9642	15.0648	14.8384	14.7666	14.4748		-1.61033	-3.7904	-2.65555	-2.05799	-1.7126	-2.51755		-1.61033	-3.7904	-2.65555	-2.05799	-1.7126	-2.51755		0.58938	-0.801463	6.54648
P18621	60S ribosomal protein L17 OS=Homo sapiens OX=9606 GN=RPL17 PE=1 SV=3	[K].SAEFLLHMLK.[N]			157116				36664.3			17.2615				15.1621			-1.49318				-1.83031		-5.03747	-1.49318	-4.83192	-4.41232	-4.82782	-1.83031		0.0973712	-0.745061	2.51651
P18621	60S ribosomal protein L17 OS=Homo sapiens OX=9606 GN=RPL17 PE=1 SV=3	[K].SAEFLLHMLK.[N]	1xOxidation [M8]	1.63646e+06	1.02089e+07	5.20638e+06	1.87156e+06	457905	1.05679e+06		20.6421	23.2833	22.3119	20.8358	18.8047	20.0113		3.43545	4.52868	4.59153	3.93937	2.32552	3.01885		3.43545	4.52868	4.59153	3.93937	2.32552	3.01885		-1.09064	-0.745061	2.51651
Q6KB66	Keratin, type II cytoskeletal 80 OS=Homo sapiens OX=9606 GN=KRT80 PE=1 SV=2	[R].SAEYGSSLQSSR.[S]			59867.2							15.8695							-2.88517						-4.83392	-2.88517	-4.78373	-4.65224	-4.8162	-4.56		-0.508542	-0.193406	0.186189
Q66PJ3	ADP-ribosylation factor-like protein 6-interacting protein 4 OS=Homo sapiens OX=9606 GN=ARL6IP4 PE=1 SV=2	[R].SAGEEEDGPVLTDEQK.[S]		42791.4		38733.7	20273.3	24754.7	119954		15.385		15.2413	14.3073	14.5954	16.8721		-1.82167		-2.47902	-2.58914	-1.88376	-0.120282		-1.82167	-5.23827	-2.47902	-2.58914	-1.88376	-0.120282		1.64859	1.64859	1.86705
TGME49_230705-t26_1-p1	transcript=TGME49_230705-t26_1 | gene=TGME49_230705 | organism=Toxoplasma_gondii_ME49 | gene_product=hypothetical protein | transcript_product=hypothetical protein | location=TGME49_chrVIII:990431-991782(-) | protein_length=266 | sequence_SO=chromosome | SO=protein_coding | is_pseudo=false	[R].SAGETKTEDQVAFGESESDGAHAR.[M]					220466	62280	112253					17.7502	15.9265	16.7764					0.853762	-0.552692	-0.216008		-4.85635	-5.36361	-4.89554	0.853762	-0.552692	-0.216008		5.06686	3.40572	8.14165
P62269	40S ribosomal protein S18 OS=Homo sapiens OX=9606 GN=RPS18 PE=1 SV=3	[R].RYAHVVLR.[K]		191376	661175	302605	70770.9	152910	136197		17.5461	19.3347	18.2071	16.1109	17.2223	17.0553		0.33935	0.580027	0.486753	-0.785568	0.743149	0.0629357		0.33935	0.580027	0.486753	-0.785568	0.743149	0.0629357		-0.461871	-0.612376	1.94788
Q05682	Caldesmon OS=Homo sapiens OX=9606 GN=CALD1 PE=1 SV=3	[K].SAKPTKPAASDLPVPAEGVR.[N]			157125	66869.8	12391.5	8441.36	47518.8			17.2616	16.0291	13.5971	13.0433	15.5362			-1.49309	-1.69125	-3.29937	-3.43591	-1.45619		-5.07939	-1.49309	-1.69125	-3.29937	-3.43591	-1.45619		0.0240881	-0.394802	0.713066
Q9HCY8	Protein S100-A14 OS=Homo sapiens OX=9606 GN=S100A14 PE=1 SV=1	[R].SANAEDAQEFSDVER.[A]		21599.6		25113.6	36546.8		33489.4		14.3987		14.6162	15.1575		15.0314		-2.80799		-3.10414	-1.73898		-1.96099		-2.80799	-5.16897	-3.10414	-1.73898	-4.77544	-1.96099		0.868562	0.868562	0.941105
Q9UBV8	Peflin OS=Homo sapiens OX=9606 GN=PEF1 PE=1 SV=1	[R].SANPAMQLDR.[F]					108474		65140.6					16.727		15.9913					-0.169441		-1.00113		-4.99548	-5.30901	-4.67901	-0.169441	-4.62759	-1.00113		3.06178	5.13604	7.9323
Q9UBV8	Peflin OS=Homo sapiens OX=9606 GN=PEF1 PE=1 SV=1	[R].SANPAMQLDR.[F]	1xOxidation [M6]				226100	128819	70258					17.7866	16.975	16.1004					0.890167	0.495813	-0.892026		-4.91319	-5.15773	-4.93202	0.890167	0.495813	-0.892026		5.16563	5.13604	7.9323
TGME49_239740-t26_1-p1	transcript=TGME49_239740-t26_1 | gene=TGME49_239740 | organism=Toxoplasma_gondii_ME49 | gene_product=dense granule protein GRA14 | transcript_product=dense granule protein GRA14 | location=TGME49_chrVI:883160-884386(-) | protein_length=408 | sequence_SO=chromosome | SO=protein_coding | is_pseudo=false	[K].SAPEVQEVLSR.[F]					834593	573362	516745					19.6707	19.1291	18.9791					2.77428	2.64991	1.98669		-5.08366	-5.33195	-4.95491	2.77428	2.64991	1.98669		7.5938	5.93448	38.4972
Q8NEZ2	Vacuolar protein sorting-associated protein 37A OS=Homo sapiens OX=9606 GN=VPS37A PE=1 SV=1	[K].SASSSAAGSPGGLTSLQQQK.[Q]					217808	98326.7	82325.7					17.7327	16.5853	16.3291					0.836261	0.106122	-0.663346		-4.90225	-5.40711	-4.76183	0.836261	0.106122	-0.663346		5.11674	3.73092	7.5573
P80297	Metallothionein-1X OS=Homo sapiens OX=9606 GN=MT1X PE=1 SV=1	[K].SCCSCCPVGCAK.[C]	5xCarbamidomethyl [C2	69844.2	110075	62712			72862.6		16.0919	16.7481	15.9365			16.1529		-1.11485	-2.00652	-1.78387			-0.839512		-1.11485	-2.00652	-1.78387	-4.43192	-4.89164	-0.839512		-1.75261	-1.75261	1.72124
Q9C075	Keratin, type I cytoskeletal 23 OS=Homo sapiens OX=9606 GN=KRT23 PE=1 SV=2	[K].SALENMLSETQSR.[Y]	1xOxidation [M6]		36754.9			4223.09	10105.4			15.1656			12.0441	13.3028			-3.589			-4.43509	-3.68956		-4.91113	-3.589	-4.94831	-4.62166	-4.43509	-3.68956		0.234045	0.234045	0.544893
P13645	Keratin, type I cytoskeletal 10 OS=Homo sapiens OX=9606 GN=KRT10 PE=1 SV=6	[R].RVLDELTLTK.[A]		149672	5.55223e+06	347724	157246	188737	619070		17.1914	22.4046	18.4076	17.2627	17.526	19.2397		-0.0152601	3.64999	0.687262	0.366228	1.04684	2.24734		-0.0152601	3.64999	0.687262	0.366228	1.04684	2.24734		-0.220527	-0.141331	0.518507
P02533	Keratin, type I cytoskeletal 14 OS=Homo sapiens OX=9606 GN=KRT14 PE=1 SV=4 Keratin, type I cytoskeletal 19 OS=Homo sapiens OX=9606 GN=KRT19 PE=1 SV=4 Keratin, type I cytoskeletal 17 OS=Homo sapiens OX=9606 GN=KRT17 PE=1 SV=2 Keratin, type I cytoskeletal 16 OS=Homo sapiens OX=9606 GN=KRT16 PE=1 SV=4	[R].RVLDELTLAR.[AT]		24278.4	1.35721e+06	156033	38190.3	170984	145979		14.5674	20.3722	17.2515	15.2209	17.3835	17.1554		-2.63932	1.61757	-0.468826	-1.67552	0.904333	0.162995		-2.63932	1.61757	-0.468826	-1.67552	0.904333	0.162995		0.294128	0.0182555	0.0639849
TGME49_270240-t26_1-p1	transcript=TGME49_270240-t26_1 | gene=TGME49_270240 | organism=Toxoplasma_gondii_ME49 | gene_product=MAG1 | transcript_product=MAG1 | location=TGME49_chrVIII:5312269-5313737(+) | protein_length=452 | sequence_SO=chromosome | SO=protein_coding | is_pseudo=false	[R].RVEPEHEDNTRVEAR.[V]					1.94057e+06		308314					20.888		18.234					3.99161		1.24164		-4.79927	-5.13918	-4.92735	3.99161	-4.6696	1.24164		5.14315	4.92705	34.9346
P62750	60S ribosomal protein L23a OS=Homo sapiens OX=9606 GN=RPL23A PE=1 SV=1	[R].RNKLDHYAIIK.[F]		514972	1.13284e+06	351092	162235	254056	241400		18.9741	20.1115	18.4215	17.3077	17.9548	17.8811		1.76743	1.35686	0.70117	0.411291	1.47562	0.888665		1.76743	1.35686	0.70117	0.411291	1.47562	0.888665		-0.349964	-0.330071	0.980072
P02751	Fibronectin OS=Homo sapiens OX=9606 GN=FN1 PE=1 SV=4	[R].RPGGEPSPEGTTGQSYNQYSQR.[Y]		786803	682664	241180	67963.6	59844.7	192486		19.5856	19.3808	17.8797	16.0525	15.8689	17.5544		2.37894	0.626171	0.159427	-0.843962	-0.610236	0.561993		2.37894	0.626171	0.159427	-0.843962	-0.610236	0.561993		-1.35225	-1.69425	11.343
P56945	Breast cancer anti-estrogen resistance protein 1 OS=Homo sapiens OX=9606 GN=BCAR1 PE=1 SV=2	[R].RPGPGTLYDVPR.[E]		300911	1.27265e+06	572347	261924	87987	194996		18.199	20.2794	19.1265	17.9988	16.425	17.5731		0.992274	1.52476	1.40621	1.10235	-0.0541699	0.580685		0.992274	1.52476	1.40621	1.10235	-0.0541699	0.580685		-0.764791	-1.30325	6.48799
P10909	Clusterin OS=Homo sapiens OX=9606 GN=CLU PE=1 SV=1	[R].RPHFFFPK.[S]			31831.9		29585		28145.2			14.9582		14.8526		14.7806			-3.79646		-2.04386		-2.2118		-4.82722	-3.79646	-4.94698	-2.04386	-4.7464	-2.2118		1.52287	1.21566	2.42838
O43281	Embryonal Fyn-associated substrate OS=Homo sapiens OX=9606 GN=EFS PE=1 SV=1	[R].RPLPALPVPEAPSPSPVPSPAPGR.[K]		39191.3	928284	427471	239576		105604		15.2582	19.8242	18.7055	17.8701		16.6883		-1.94846	1.06956	0.985145	0.973689		-0.3041		-1.94846	1.06956	0.985145	0.973689	-4.6513	-0.3041		-1.36265	-1.12462	2.78147
P98095	Fibulin-2 OS=Homo sapiens OX=9606 GN=FBLN2 PE=1 SV=2	[R].RPPEPAAAPR.[R]		4.15272e+06	1.74861e+06	462014	278708	415542	533592		21.9856	20.7378	18.8176	18.0884	18.6646	19.0254		4.77892	1.98313	1.09726	1.19196	2.18546	2.03297		4.77892	1.98313	1.09726	1.19196	2.18546	2.03297		-0.816306	-0.660873	1.56843
P35579	Myosin-9 OS=Homo sapiens OX=9606 GN=MYH9 PE=1 SV=4	[K].RQAQQERDELADEIANSSGK.[G]			1.66249e+06	619447			161863			20.6649	19.2406			17.3044			1.91027	1.5203			0.312016		-4.91956	1.91027	1.5203	-4.52807	-4.90449	0.312016		-2.54385	-1.7311	75.0609
P35579	Myosin-9 OS=Homo sapiens OX=9606 GN=MYH9 PE=1 SV=4	[K].RQLEEAEEEAQR.[A]		117724	2.46554e+06	870198		115072	235068		16.845	21.2335	19.731		16.8122	17.8427		-0.361654	2.47883	2.01066		0.333002	0.850317		-0.361654	2.47883	2.01066	-4.67661	0.333002	0.850317		-2.54038	-1.7311	75.0609
P35580	Myosin-10 OS=Homo sapiens OX=9606 GN=MYH10 PE=1 SV=3	[K].RQLEEAEEEATR.[A]		42591.8	513122	161036	18381.2		41046.1		15.3783	18.9689	17.297	14.1659		15.325		-1.82842	0.214296	-0.423301	-2.73049		-1.66745		-1.82842	0.214296	-0.423301	-2.73049	-4.776	-1.66745		-2.37884	-1.95045	59.9637
TGME49_254720-t26_1-p1	transcript=TGME49_254720-t26_1 | gene=TGME49_254720 | organism=Toxoplasma_gondii_ME49 | gene_product=dense granule protein GRA8 | transcript_product=dense granule protein GRA8 | location=TGME49_chrIII:1904580-1905389(+) | protein_length=269 | sequence_SO=chromosome | SO=protein_coding | is_pseudo=false	[R].RQPATATTTTTTR.[N]		3428282	2.07807e+06	492830	2.41094e+06	1.2156e+06	1.12083e+06		21.7091	20.9868	18.9107	21.2012	20.2132	20.0961		4.50235	2.23217	1.19041	4.30473	3.73406	3.10374		4.50235	2.23217	1.19041	4.30473	3.73406	3.10374		1.07253	5.58595	15.2749
P08670	Vimentin OS=Homo sapiens OX=9606 GN=VIM PE=1 SV=4	[R].RQVDQLTNDK.[A]		161653	873769	294612	52969.8	67049.8			17.3025	19.7369	18.1685	15.6929	16.0329			0.0958365	0.982248	0.448135	-1.20355	-0.446228			0.0958365	0.982248	0.448135	-1.20355	-0.446228	-4.47158		-2.54919	-1.45396	18.1104
P08670	Vimentin OS=Homo sapiens OX=9606 GN=VIM PE=1 SV=4	[R].RQVDQLTNDKAR.[V]		44178.5	360139						15.4311	18.4582						-1.77565	-0.296452						-1.77565	-0.296452	-4.91585	-4.57498	-4.72239	-4.54274		-2.28405	-1.45396	18.1104
P08670	Vimentin OS=Homo sapiens OX=9606 GN=VIM PE=1 SV=4	[R].RQVQSLTCEVDALKGTNESLER.[Q]	1xCarbamidomethyl [C8]		79966.3							16.2871							-2.46754						-4.83301	-2.46754	-4.82548	-4.60561	-4.79835	-4.61862		-0.632184	-1.45396	18.1104
P02533	Keratin, type I cytoskeletal 14 OS=Homo sapiens OX=9606 GN=KRT14 PE=1 SV=4	[R].RTMQNLEIELQSQLSMK.[A]	2xOxidation [M3		194399	101501	129526	104028	27238.1			17.5687	16.6311	16.9829	16.6666	14.7333			-1.18598	-1.08919	0.0864423	0.187436	-2.25906		-5.04336	-1.18598	-1.08919	0.0864423	0.187436	-2.25906		1.77778	0.0182555	0.0639849
P08708	40S ribosomal protein S17 OS=Homo sapiens OX=9606 GN=RPS17 PE=1 SV=2	[K].RVCEEIAIIPSKK.[L]	1xCarbamidomethyl [C3]	62402.9	363862	100467	32399	31036.6	29141.5		15.9293	18.473	16.6164	14.9837	14.9217	14.8308		-1.27738	-0.281615	-1.10395	-1.91278	-1.55749	-2.16162		-1.27738	-0.281615	-1.10395	-1.91278	-1.55749	-2.16162		-0.989646	-1.23491	4.32648
P14649	Myosin light chain 6B OS=Homo sapiens OX=9606 GN=MYL6B PE=1 SV=1	[R].RVDFETFLPMLQAVAK.[N]	1xOxidation [M10]		107094	23218.9						16.7085	14.503						-2.04613	-3.21731					-5.07464	-2.04613	-3.21731	-4.4788	-4.64245	-4.45465		-1.07928	-1.48568	3.06117
Q9NWB6	Arginine and glutamate-rich protein 1 OS=Homo sapiens OX=9606 GN=ARGLU1 PE=1 SV=1	[K].RVEEELEKR.[K]			191677	138061						17.5483	17.0749						-1.20633	-0.645378					-4.96102	-1.20633	-0.645378	-4.46306	-4.68921	-4.54822		-2.29592	-1.14433	0.842389
Q8WWI1	LIM domain only protein 7 OS=Homo sapiens OX=9606 GN=LMO7 PE=1 SV=3	[K].SMSDVSAEDVQNLR.[Q]	1xOxidation [M2]	26073.7	301198	91350.8			23071.6		14.6703	18.2004	16.4791			14.4938		-2.53639	-0.554294	-1.24119			-2.49857		-2.53639	-0.554294	-1.24119	-4.69981	-4.63074	-2.49857		-2.49908	-1.67673	4.00167
P32969	60S ribosomal protein L9 OS=Homo sapiens OX=9606 GN=RPL9 PE=1 SV=1	[K].TILSNQTVDIPENVDITLK.[G]			124555	54065.1						16.9264	15.7224						-1.82822	-1.99791					-4.9711	-1.82822	-1.99791	-4.68966	-4.87071	-4.52703		-1.76339	-1.0793	1.19327
Q9NYL9	Tropomodulin-3 OS=Homo sapiens OX=9606 GN=TMOD3 PE=1 SV=1	[R].SNDPVATAFAEMLK.[V]	1xOxidation [M12]	19276.8	2212497	696469	73844	10951.3	134437		14.2346	21.0772	19.4097	16.1722	13.4188	17.0366		-2.97212	2.3226	1.68938	-0.724244	-3.06036	0.0441704		-2.97212	2.3226	1.68938	-0.724244	-3.06036	0.0441704		-1.59343	-1.8006	9.86752
Q8IWK6	Adhesion G protein-coupled receptor A3 OS=Homo sapiens OX=9606 GN=ADGRA3 PE=1 SV=2	[K].SNGQEGPLLGTDSTGNVR.[T]		83895.7	121168	85461.6	84642.3	47402.7	36963.2		16.3563	16.8866	16.383	16.3691	15.5327	15.1738		-0.850393	-1.868	-1.33733	-0.527345	-0.946492	-1.8186		-0.850393	-1.868	-1.33733	-0.527345	-0.946492	-1.8186		0.254429	0.094451	0.122435
P35579	Myosin-9 OS=Homo sapiens OX=9606 GN=MYH9 PE=1 SV=4	[R].TEMEDLMSSKDDVGK.[S]			2.68255e+06	1.19105e+06			196447			21.3552	20.1838			17.5838			2.60053	2.46348			0.591378		-4.9853	2.60053	2.46348	-4.40517	-4.90763	0.591378		-2.93337	-1.7311	75.0609
P35579	Myosin-9 OS=Homo sapiens OX=9606 GN=MYH9 PE=1 SV=4	[R].TEMEDLMSSKDDVGK.[S]	1xOxidation [M]	24459	4.59797e+06	1.91739e+06	104849		409359		14.5781	22.1326	20.8707	16.6779		18.643		-2.62863	3.37792	3.15039	-0.218489		1.65061		-2.62863	3.37792	3.15039	-0.218489	-4.8537	1.65061		-2.44042	-1.7311	75.0609
P35579	Myosin-9 OS=Homo sapiens OX=9606 GN=MYH9 PE=1 SV=4	[R].TEMEDLMSSKDDVGK.[S]	2xOxidation [M3	279257	2.51148e+06	965237	114705	269881	213123		18.0912	21.2601	19.8805	16.8076	18.042	17.7013		0.884534	2.50546	2.1602	-0.0888613	1.56279	0.708923		0.884534	2.50546	2.1602	-0.0888613	1.56279	0.708923		-1.12245	-1.7311	75.0609
P35579	Myosin-9 OS=Homo sapiens OX=9606 GN=MYH9 PE=1 SV=4	[R].TEMEDLMSSKDDVGKSVHELEK.[S]	2xOxidation [M3		408987	176397	19735					18.6417	17.4285	14.2685					-0.11295	-0.291857	-2.62797				-5.01054	-0.11295	-0.291857	-2.62797	-4.63069	-4.49208		-2.1118	-1.7311	75.0609
TGME49_275470-t26_1-p1	transcript=TGME49_275470-t26_1 | gene=TGME49_275470 | organism=Toxoplasma_gondii_ME49 | gene_product=dense granule protein GRA15 | transcript_product=dense granule protein GRA15 | location=TGME49_chrX:7287059-7288711(+) | protein_length=550 | sequence_SO=chromosome | SO=protein_coding | is_pseudo=false	[R].TENPRQPQVPGENSYYSVPTER.[T]					132969		84962.6					17.0207		16.3745					0.12429		-0.617862		-5.02158	-5.19677	-4.80978	0.12429	-4.66917	-0.617862		3.28846	4.44009	12.9114
P35579	Myosin-9 OS=Homo sapiens OX=9606 GN=MYH9 PE=1 SV=4	[K].TELEDTLDSTAAQQELR.[S]			344269	340756			106861			18.3932	18.3784			16.7054			-0.361468	0.65806			-0.287025		-4.80183	-0.361468	0.65806	-4.52742	-4.61048	-0.287025		-1.6399	-1.7311	75.0609
Q9UGY1	Nucleolar protein 12 OS=Homo sapiens OX=9606 GN=NOL12 PE=1 SV=1	[K].TESVQYDHPNHTVTVTTISDLDLSGAR.[L]			794895	146064	95381.9		102438			19.6004	17.1562	16.5414		16.6444			0.84576	-0.564078	-0.355008		-0.348013		-5.06674	0.84576	-0.564078	-0.355008	-4.88948	-0.348013		-0.269148	-0.386779	0.558282
P11021	Endoplasmic reticulum chaperone BiP OS=Homo sapiens OX=9606 GN=HSPA5 PE=1 SV=2	[K].TFAPEEISAMVLTK.[M]	1xOxidation [M10]		146361							17.1592							-1.59547						-4.96811	-1.59547	-4.83126	-4.61369	-4.67344	-4.52411		-0.805467	-0.218298	0.708121
O43852	Calumenin OS=Homo sapiens OX=9606 GN=CALU PE=1 SV=2	[K].TFDQLTPEESK.[E]		22539.6	125730	58703.1		34930.7	52600.4		14.4602	16.94	15.8411		15.0922	15.6828		-2.74653	-1.81468	-1.87917		-1.38697	-1.30962		-2.74653	-1.81468	-1.87917	-4.64732	-1.38697	-1.30962		-0.301175	0.214061	0.357735
O43852	Calumenin OS=Homo sapiens OX=9606 GN=CALU PE=1 SV=2	[K].TFDQLTPEESKER.[L]		129258	647972	266836	181562	166145	229947		16.9799	19.3056	18.0256	17.4701	17.3421	17.8109		-0.226807	0.550927	0.30527	0.573663	0.862911	0.818542		-0.226807	0.550927	0.30527	0.573663	0.862911	0.818542		0.541909	0.214061	0.357735
P15531	Nucleoside diphosphate kinase A OS=Homo sapiens OX=9606 GN=NME1 PE=1 SV=1	[R].TFIAIKPDGVQR.[G]			145317	43581		14850.4				17.1488	15.4114		13.8582				-1.6058	-2.30891		-2.62096			-5.07245	-1.6058	-2.30891	-4.65594	-2.62096	-4.66989		-0.986546	-0.552721	0.402799
Q96P63	Serpin B12 OS=Homo sapiens OX=9606 GN=SERPINB12 PE=1 SV=1	[K].TFVEVDENGTQAAAATGAVVSER.[S]			102718							16.6483							-2.10632						-4.84655	-2.10632	-4.79288	-4.48174	-4.73188	-4.50228		-0.656716	-0.765434	1.03482
P46776	60S ribosomal protein L27a OS=Homo sapiens OX=9606 GN=RPL27A PE=1 SV=2	[K].TGAAPIIDVVR.[S]		5.15109e+06	19078856	7504861	2.26921e+06	3.38331e+06	4.17978e+06		22.2964	24.1855	22.8394	21.1138	21.69	21.995		5.08975	5.43083	5.11907	4.21732	5.21083	5.00259		5.08975	5.43083	5.11907	4.21732	5.21083	5.00259		-0.402965	-0.721581	1.30584
P25705	ATP synthase subunit alpha, mitochondrial OS=Homo sapiens OX=9606 GN=ATP5F1A PE=1 SV=1	[R].TGAIVDVPVGEELLGR.[V]			92414.6	36026.4			33920.2			16.4958	15.1368			15.0499			-2.25881	-2.58355			-1.94254		-5.08181	-2.25881	-2.58355	-4.57183	-4.663	-1.94254		-0.417734	0.0271708	0.0299802
Q6UN15	Pre-mRNA 3'-end-processing factor FIP1 OS=Homo sapiens OX=9606 GN=FIP1L1 PE=1 SV=1	[K].TGAPQYGSYGTAPVNLNIK.[T]			132177	50686.9	20393.9		50408.6			17.0121	15.6293	14.3158		15.6214			-1.74253	-2.091	-2.58059		-1.37102		-4.82027	-1.74253	-2.091	-2.58059	-4.81192	-1.37102		-0.0365797	0.242774	0.170392
P02751	Fibronectin OS=Homo sapiens OX=9606 GN=FN1 PE=1 SV=4	[R].TEIDKPSQMQVTDVQDNSISVK.[W]	1xOxidation [M9]	618822	310577				62114.6		19.2392	18.2446				15.9226		2.03246	-0.510056				-1.06976		2.03246	-0.510056	-4.85407	-4.41724	-4.61063	-1.06976		-2.25532	-1.69425	11.343
P35579	Myosin-9 OS=Homo sapiens OX=9606 GN=MYH9 PE=1 SV=4	[R].TELADKVTK.[L]		125841	2.46214e+06	1.01254e+06	70937.8	121574	261052		16.9412	21.2315	19.9496	16.1143	16.8915	17.994		-0.265463	2.47684	2.22923	-0.782168	0.412308	1.00158		-0.265463	2.47684	2.22923	-0.782168	0.412308	1.00158		-1.26963	-1.7311	75.0609
TGME49_229010-t26_1-p1	transcript=TGME49_229010-t26_1 | gene=TGME49_229010 | organism=Toxoplasma_gondii_ME49 | gene_product=rhoptry neck protein RON4 | transcript_product=rhoptry neck protein RON4 | location=TGME49_chrVIII:20265-26992(+) | protein_length=984 | sequence_SO=chromosome | SO=protein_coding | is_pseudo=false	[K].TASQSSLAPTGDNNSKVESIIAGSDTTPR.[S]					86547.5		67574.7					16.4012		16.0442					-0.495231		-0.948206		-4.82605	-5.1328	-4.92871	-0.495231	-4.69586	-0.948206		2.91609	3.11196	3.19765
Q07065	Cytoskeleton-associated protein 4 OS=Homo sapiens OX=9606 GN=CKAP4 PE=1 SV=2	[R].TAVDSLVAYSVK.[I]			97028.3		35940.5	19158.9	38088.5			16.5661		15.1333	14.2257	15.2171			-2.18853		-1.76311	-2.25344	-1.77533		-5.01694	-2.18853	-4.792	-1.76311	-2.25344	-1.77533		2.06853	0.114884	0.322937
TGME49_229480-t26_1-p1	transcript=TGME49_229480-t26_1 | gene=TGME49_229480 | organism=Toxoplasma_gondii_ME49 | gene_product=calcium binding protein precursor, putative | transcript_product=calcium binding protein precursor, putative | location=TGME49_chrVIII:292754-295302(-) | protein_length=335 | sequence_SO=chromosome | SO=protein_coding | is_pseudo=false	[K].TAVPQVDLDDEDKHDEL.[-]			69048.4		2.79444e+06	636715	1.59608e+06			16.0753		21.4141	19.2803	20.6061			-2.67933		4.51769	2.80112	3.6137		-5.04742	-2.67933	-4.72269	4.51769	2.80112	3.6137		7.79398	4.48727	20.0107
Q07020	60S ribosomal protein L18 OS=Homo sapiens OX=9606 GN=RPL18 PE=1 SV=2	[K].TAVVVGTITDDVR.[V]			123312	68732.5		22305.6	41524.9			16.912	16.0687		14.4451	15.3417			-1.84269	-1.65162		-2.03405	-1.65071		-5.02872	-1.84269	-1.65162	-4.55764	-2.03405	-1.65071		0.09354	0.159706	0.110462
P98095	Fibulin-2 OS=Homo sapiens OX=9606 GN=FBLN2 PE=1 SV=2	[R].TCRPEGHPPQPEAPQEPALK.[S]	1xCarbamidomethyl [C2]	114148	130649						16.8005	16.9953						-0.40616	-1.75931						-0.40616	-1.75931	-4.8875	-4.48189	-4.67981	-4.59719		-2.23531	-0.660873	1.56843
Q14498	RNA-binding protein 39 OS=Homo sapiens OX=9606 GN=RBM39 PE=1 SV=2	[R].TDASSASSFLDSDELER.[T]		26950.9	81702.3	76020.7	29058	16210.6	178254		14.718	16.3181	16.2141	14.8266	13.9846	17.4436		-2.48865	-2.43656	-1.50622	-2.06979	-2.49453	0.451173		-2.48865	-2.43656	-1.50622	-2.06979	-2.49453	0.451173		0.772762	0.827846	0.611262
P02751	Fibronectin OS=Homo sapiens OX=9606 GN=FN1 PE=1 SV=4	[R].TEIDKPSQMQVTDVQDNSISVK.[W]			381281	148347			71854.3			18.5405	17.1786			16.1328			-0.214149	-0.541702			-0.859616		-4.80595	-0.214149	-0.541702	-4.63577	-4.84129	-0.859616		-1.59162	-1.69425	11.343
P07355	Annexin A2 OS=Homo sapiens OX=9606 GN=ANXA2 PE=1 SV=2	[K].TDLEKDIISDTSGDFR.[K]			166271				20701.3			17.3432				14.3374			-1.41147				-2.65497		-4.81006	-1.41147	-4.72805	-4.58727	-4.66131	-2.65497		-0.31799	-0.226677	0.443687
P35579	Myosin-9 OS=Homo sapiens OX=9606 GN=MYH9 PE=1 SV=4	[K].TDLLLEPYNK.[Y]			1.23387e+06	575281		14256.1	66630.3			20.2348	19.1339		13.7993	16.0239			1.48011	1.41359		-2.67988	-0.968511		-5.04099	1.48011	1.41359	-4.43807	-2.67988	-0.968511		-1.97972	-1.7311	75.0609
P61978	Heterogeneous nuclear ribonucleoprotein K OS=Homo sapiens OX=9606 GN=HNRNPK PE=1 SV=1	[R].TDYNASVSVPDSSGPER.[I]		42257.9	97898.3	44688	19749.5	24605.7	37658.1		15.3669	16.579	15.4476	14.2695	14.5867	15.2007		-1.83977	-2.17565	-2.27272	-2.62691	-1.89247	-1.79173		-1.83977	-2.17565	-2.27272	-2.62691	-1.89247	-1.79173		-0.00765517	-0.861942	0.636756
P13647	Keratin, type II cytoskeletal 5 OS=Homo sapiens OX=9606 GN=KRT5 PE=1 SV=3	[R].TEAESWYQTK.[Y]			122943	25149.9			15150.4			16.9076	14.6183			13.8871			-1.84701	-3.10206			-3.10534		-4.87956	-1.84701	-3.10206	-4.46769	-4.65561	-3.10534		-0.800003	0.091607	0.259862
TGME49_230705-t26_1-p1	transcript=TGME49_230705-t26_1 | gene=TGME49_230705 | organism=Toxoplasma_gondii_ME49 | gene_product=hypothetical protein | transcript_product=hypothetical protein | location=TGME49_chrVIII:990431-991782(-) | protein_length=266 | sequence_SO=chromosome | SO=protein_coding | is_pseudo=false	[K].TEDQVAFGESESDGAHAR.[M]					55843.7	26763.9	28030.8					15.7691	14.708	14.7747					-1.12733	-1.77117	-2.21768		-4.89846	-5.37189	-4.82488	-1.12733	-1.77117	-2.21768		3.32635	3.40572	8.14165
P08779	Keratin, type I cytoskeletal 16 OS=Homo sapiens OX=9606 GN=KRT16 PE=1 SV=4	[K].TEELNKEVASNSELVQSSR.[S]			945474			265993				19.8507			18.021				1.09603			1.54185			-5.00321	1.09603	-4.85897	-4.55309	1.54185	-4.47367		0.42708	0.289347	0.93167
P02533	Keratin, type I cytoskeletal 14 OS=Homo sapiens OX=9606 GN=KRT14 PE=1 SV=4 Keratin, type I cytoskeletal 17 OS=Homo sapiens OX=9606 GN=KRT17 PE=1 SV=2	[K].TEELNREVATNSELVQSGK.[S]			137578							17.0699							-1.68476						-5.00004	-1.68476	-4.82897	-4.66676	-4.73379	-4.49941		-0.795396	0.0182555	0.0639849
P22061	Protein-L-isoaspartate(D-aspartate) O-methyltransferase OS=Homo sapiens OX=9606 GN=PCMT1 PE=1 SV=4	[K].TDKVFEVMLATDR.[S]	1xOxidation [M8]	27653.7	394287	195640	142941	12065.9	79591.8		14.7552	18.5889	17.5778	17.1251	13.5587	16.2803		-2.45152	-0.165758	-0.142477	0.228622	-2.92052	-0.71207		-2.45152	-0.165758	-0.142477	0.228622	-2.92052	-0.71207		-0.214739	-0.592724	1.15139
E9PRG8	Uncharacterized protein C11orf98 OS=Homo sapiens OX=9606 GN=C11orf98 PE=4 SV=2	[K].TAMEVEAPSKPAR.[T]	1xOxidation [M3]	183466	483179	114515	117713	74077.8	47851.7		17.4852	18.8822	16.8052	16.8449	16.1768	15.5463		0.278452	0.127552	-0.915139	-0.0515186	-0.30242	-1.44612		0.278452	0.127552	-0.915139	-0.0515186	-0.30242	-1.44612		-0.430308	-0.638286	1.38269
Q15084	Protein disulfide-isomerase A6 OS=Homo sapiens OX=9606 GN=PDIA6 PE=1 SV=1	[R].TGEAIVDAALSALR.[Q]			67918.6	23214.7						16.0515	14.5027						-2.70313	-3.21757					-4.96778	-2.70313	-3.21757	-4.42358	-4.7147	-4.49083		-0.913546	-0.697776	0.513124
Q6P5R6	60S ribosomal protein L22-like 1 OS=Homo sapiens OX=9606 GN=RPL22L1 PE=1 SV=2	[K].TGNLGNVVHIER.[F]			135232	20967.8		21910.9	19755.8			17.0451	14.3559		14.4194	14.27			-1.70957	-3.36444		-2.05981	-2.72241		-5.07372	-1.70957	-3.36444	-4.47483	-2.05981	-2.72241		0.29689	0.29689	0.287892
Q9NYL9	Tropomodulin-3 OS=Homo sapiens OX=9606 GN=TMOD3 PE=1 SV=1	[R].TKENDAHLVEVNLNNIK.[N]		121039	5.99311e+06	1.46745e+06	220044	26759.6	307898		16.8851	22.5149	20.4849	17.7474	14.7078	18.2321		-0.321586	3.76023	2.76456	0.850995	-1.7714	1.23969		-0.321586	3.76023	2.76456	0.850995	-1.7714	1.23969		-1.96131	-1.8006	9.86752
P11021	Endoplasmic reticulum chaperone BiP OS=Homo sapiens OX=9606 GN=HSPA5 PE=1 SV=2	[K].TKPYIQVDIGGGQTK.[T]			134543	32999.6						17.0377	15.0102						-1.71693	-2.71016					-4.80036	-1.71693	-2.71016	-4.49692	-4.64299	-4.43533		-1.44926	-0.218298	0.708121
P02751	Fibronectin OS=Homo sapiens OX=9606 GN=FN1 PE=1 SV=4	[R].TKTETITGFQVDAVPANGQTPIQR.[T]		110241	321251	136458			78036.7		16.7503	18.2933	17.0581			16.2519		-0.456402	-0.461305	-0.66222			-0.740538		-0.456402	-0.461305	-0.66222	-4.64433	-4.89802	-0.740538		-2.90099	-1.69425	11.343
P08779	Keratin, type I cytoskeletal 16 OS=Homo sapiens OX=9606 GN=KRT16 PE=1 SV=4	[R].TKYEHELALR.[Q]		28819.2	1.73694e+06	85684.9	37086.9	802646	182654		14.8147	20.7281	16.3868	15.1786	19.6144	17.4788		-2.39196	1.97347	-1.33357	-1.71782	3.13523	0.486355		-2.39196	1.97347	-1.33357	-1.71782	3.13523	0.486355		1.21861	0.289347	0.93167
P02533	Keratin, type I cytoskeletal 14 OS=Homo sapiens OX=9606 GN=KRT14 PE=1 SV=4	[R].TKYETELNLR.[M]		66959.1	2.03361e+06	300828	116253	163549	215585		16.031	20.9556	18.1986	16.8269	17.3194	17.7179		-1.17571	2.20096	0.47826	-0.069526	0.840188	0.725494		-1.17571	2.20096	0.47826	-0.069526	0.840188	0.725494		-0.00245267	0.0182555	0.0639849
Q06830	Peroxiredoxin-1 OS=Homo sapiens OX=9606 GN=PRDX1 PE=1 SV=1	[R].TIAQDYGVLK.[A]		15602.2	189706	70956.8		50061.4	60548.7		13.9295	17.5334	16.1147		15.6114	15.8858		-3.27724	-1.22124	-1.60567		-0.867761	-1.10659		-3.27724	-1.22124	-1.60567	-4.61703	-0.867761	-1.10659		-0.162412	0.164691	0.114016
TGME49_270240-t26_1-p1	transcript=TGME49_270240-t26_1 | gene=TGME49_270240 | organism=Toxoplasma_gondii_ME49 | gene_product=MAG1 | transcript_product=MAG1 | location=TGME49_chrVIII:5312269-5313737(+) | protein_length=452 | sequence_SO=chromosome | SO=protein_coding | is_pseudo=false	[K].TKELVEPTSKEAEEAR.[Q]					294836	29331.1	25798					18.1696	14.8401	14.655					1.27312	-1.63903	-2.33743		-4.99744	-5.12772	-4.93055	1.27312	-1.63903	-2.33743		4.11746	4.92705	34.9346
P67936	Tropomyosin alpha-4 chain OS=Homo sapiens OX=9606 GN=TPM4 PE=1 SV=3	[K].TIDDLEEKLAQAK.[E]		67178.9	2.06639e+06	400506	82567.6		165838		16.0357	20.9787	18.6115	16.3333		17.3394		-1.17098	2.22404	0.891143	-0.563148		0.347015		-1.17098	2.22404	0.891143	-0.563148	-4.84394	0.347015		-2.33476	-1.11715	10.5206
P35579	Myosin-9 OS=Homo sapiens OX=9606 GN=MYH9 PE=1 SV=4	[K].TLEEEAKTHEAQIQEMR.[Q]			2.00939e+06	442160			162419			20.9383	18.7542			17.3094			2.18368	1.03389			0.31696		-4.92316	2.18368	1.03389	-4.53936	-4.83048	0.31696		-2.4491	-1.7311	75.0609
P35579	Myosin-9 OS=Homo sapiens OX=9606 GN=MYH9 PE=1 SV=4	[K].TLEEEAKTHEAQIQEMR.[Q]	1xOxidation [M16]	175555	8.08086e+06	5.31527e+06	432610	254540	640133		17.4216	22.9461	22.3417	18.7227	17.9575	19.288		0.214861	4.19143	4.62139	1.82627	1.47836	2.29561		0.214861	4.19143	4.62139	1.82627	1.47836	2.29561		-1.14248	-1.7311	75.0609
P02545	Prelamin-A/C OS=Homo sapiens OX=9606 GN=LMNA PE=1 SV=1	[R].TLEGELHDLR.[G]		25041.6	241609	120430			67796.8		14.612	17.8823	16.8778			16.0489		-2.59466	-0.872332	-0.84248			-0.943472		-2.59466	-0.872332	-0.84248	-4.56974	-4.64035	-0.943472		-1.94803	-0.90132	4.27226
P15924	Desmoplakin OS=Homo sapiens OX=9606 GN=DSP PE=1 SV=3	[R].TLELQGLINDLQR.[E]			70487.2							16.1051							-2.64957						-4.94717	-2.64957	-4.82117	-4.53514	-4.7975	-4.42275		-0.445825	0.231076	0.904463
P09874	Poly [ADP-ribose] polymerase 1 OS=Homo sapiens OX=9606 GN=PARP1 PE=1 SV=4	[K].TLGDFAAEYAK.[S]		216626	176208	60701.5					17.7248	17.4269	15.8894					0.518143	-1.32772	-1.83088					0.518143	-1.32772	-1.83088	-4.48691	-4.71746	-4.61547		-3.72646	-2.07961	3.7408
Q71U36	Tubulin alpha-1A chain OS=Homo sapiens OX=9606 GN=TUBA1A PE=1 SV=1	[K].TIGGGDDSFNTFFSETGAGK.[H]			682280	403777	100858		167578			19.38	18.6232	16.622		17.3545			0.625359	0.90288	-0.274473		0.362068		-4.95634	0.625359	0.90288	-0.274473	-4.62936	0.362068		-0.371222	-0.302859	0.477627
P05089	Arginase-1 OS=Homo sapiens OX=9606 GN=ARG1 PE=1 SV=2	[R].TIGIIGAPFSK.[G]			338181	49632.8	65680	36227.4	347203			18.3674	15.599	16.0032	15.1448	18.4054			-0.387208	-2.12132	-0.89327	-1.33438	1.41302		-5.02244	-0.387208	-2.12132	-0.89327	-1.33438	1.41302		2.23878	1.74066	1.23371
TGME49_270240-t26_1-p1	transcript=TGME49_270240-t26_1 | gene=TGME49_270240 | organism=Toxoplasma_gondii_ME49 | gene_product=MAG1 | transcript_product=MAG1 | location=TGME49_chrVIII:5312269-5313737(+) | protein_length=452 | sequence_SO=chromosome | SO=protein_coding | is_pseudo=false	[K].TKELVEPTSK.[E]					501960	188601	124589					18.9372	17.525	16.9268					2.04078	1.0458	-0.0655898		-5.03075	-5.32977	-4.79146	2.04078	1.0458	-0.0655898		6.05766	4.92705	34.9346
P04792	Heat shock protein beta-1 OS=Homo sapiens OX=9606 GN=HSPB1 PE=1 SV=2	[K].TKDGVVEITGKHEER.[Q]			196223	37199.2	18241.6		80607.7			17.5821	15.183	14.1549		16.2986			-1.17251	-2.53734	-2.74149		-0.693773		-4.93417	-1.17251	-2.53734	-2.74149	-4.75815	-0.693773		0.150201	-0.174985	0.374866
P20908	Collagen alpha-1(V) chain OS=Homo sapiens OX=9606 GN=COL5A1 PE=1 SV=3	[K].TGPIGPQGAPGKPGPDGLR.[G]		83470.4	108622	13938.5			8748.85		16.349	16.729	13.7668			13.0949		-0.857725	-2.02569	-3.95353			-3.89752		-0.857725	-2.02569	-3.95353	-4.52798	-4.87008	-3.89752		-2.15288	-2.15288	2.94757
TGME49_310750-t26_1-p1	transcript=TGME49_310750-t26_1 | gene=TGME49_310750 | organism=Toxoplasma_gondii_ME49 | gene_product=emp24/gp25L/p24 family protein | transcript_product=emp24/gp25L/p24 family protein | location=TGME49_chrXI:1569488-1573498(+) | protein_length=601 | sequence_SO=chromosome | SO=protein_coding | is_pseudo=false	[R].TGQPAPAAAAPGYQTQR.[Q]					31090.6	27290.1	22845.4					14.9242	14.7361	14.4796					-1.97225	-1.74308	-2.51279		-5.02429	-5.11857	-4.86764	-1.97225	-1.74308	-2.51279		2.92746	2.98091	1.86343
Q7Z794	Keratin, type II cytoskeletal 1b OS=Homo sapiens OX=9606 GN=KRT77 PE=2 SV=3	[R].TGSENDFVVLK.[K]			92834.6							16.5024							-2.25227						-4.95307	-2.25227	-4.73969	-4.45143	-4.75882	-4.67531		-0.646845	-0.625626	1.34926
Q7Z794	Keratin, type II cytoskeletal 1b OS=Homo sapiens OX=9606 GN=KRT77 PE=2 SV=3	[R].TGSENDFVVLKK.[D]			143210							17.1278							-1.62688						-4.79004	-1.62688	-4.85935	-4.65935	-4.81017	-4.50864		-0.900632	-0.625626	1.34926
O75815	Breast cancer anti-estrogen resistance protein 3 OS=Homo sapiens OX=9606 GN=BCAR3 PE=1 SV=1	[R].TGSEPALSPAVVR.[R]		28049.7	67029.1	43691.1	17523.3	15598.3	18806.3		14.7757	16.0325	15.4151	14.097	13.9291	14.1989		-2.43101	-2.72215	-2.30527	-2.79945	-2.55007	-2.79347		-2.43101	-2.72215	-2.30527	-2.79945	-2.55007	-2.79347		-0.228191	-0.379682	0.271827
P21333	Filamin-A OS=Homo sapiens OX=9606 GN=FLNA PE=1 SV=4	[K].TGVAVNKPAEFTVDAK.[H]			625373	309766						19.2544	18.2408						0.499712	0.520498					-4.98976	0.499712	0.520498	-4.50474	-4.6437	-4.495		-3.22463	-0.801463	6.54648
P21333	Filamin-A OS=Homo sapiens OX=9606 GN=FLNA PE=1 SV=4	[R].TGVELGKPTHFTVNAK.[A]		119494	719759	315632	68236.9	78119.8	218335		16.8666	19.4572	18.2679	16.0583	16.2534	17.7362		-0.340126	0.702509	0.547563	-0.838172	-0.225772	0.743782		-0.340126	0.702509	0.547563	-0.838172	-0.225772	0.743782		-0.410036	-0.801463	6.54648
Q69YQ0	Cytospin-A OS=Homo sapiens OX=9606 GN=SPECC1L PE=1 SV=2	[K].TKDVEILHLR.[N]			62171.3							15.924							-2.83068						-4.8193	-2.83068	-4.78911	-4.68958	-4.88602	-4.49457		-0.543693	-0.925788	0.684163
O43390	Heterogeneous nuclear ribonucleoprotein R OS=Homo sapiens OX=9606 GN=HNRNPR PE=1 SV=1	[R].TGYTLDVTTGQR.[K]		80706.6							16.3004							-0.906304							-0.906304	-5.22506	-4.68955	-4.67018	-4.73504	-4.63219		-1.07217	-1.07217	0.963304
P35579	Myosin-9 OS=Homo sapiens OX=9606 GN=MYH9 PE=1 SV=4	[K].THEAQIQEMR.[Q]	1xOxidation [M9]		1.47921e+06	518260		86388.4	327741			20.4964	18.9833		16.3986	18.3222			1.74175	1.263		-0.080622	1.32979		-4.79429	1.74175	1.263	-4.59764	-0.080622	1.32979		-0.51964	-1.7311	75.0609
P68104	Elongation factor 1-alpha 1 OS=Homo sapiens OX=9606 GN=EEF1A1 PE=1 SV=1	[K].THINLVVIGHVDSGK.[S]		60889.1	438492	320987	306518	88640.6	416872		15.8939	18.7422	18.2922	18.2256	16.4357	18.6692		-1.31281	-0.0124548	0.571834	1.32918	-0.0434919	1.67684		-1.31281	-0.0124548	0.571834	1.32918	-0.0434919	1.67684		1.23865	0.343021	0.48797
P62841	40S ribosomal protein S15 OS=Homo sapiens OX=9606 GN=RPS15 PE=1 SV=2	[K].THLRDMIILPEMVGSMVGVYNGK.[T]	3xOxidation [M6		1.13428e+06	244871	265789		184192			20.1133	17.9017	18.0199		17.4909			1.3587	0.181344	1.12349		0.498449		-4.8725	1.3587	0.181344	1.12349	-4.78557	0.498449		0.0562725	-0.921617	2.57632
Q6WCQ1	Myosin phosphatase Rho-interacting protein OS=Homo sapiens OX=9606 GN=MPRIP PE=1 SV=3	[K].THNVHVEIEQR.[W]			69098.8	29885.7						16.0764	14.8672						-2.67827	-2.85315					-4.89235	-2.67827	-2.85315	-4.63899	-4.89054	-4.66679		-1.25752	-1.27581	2.56929
P04632	Calpain small subunit 1 OS=Homo sapiens OX=9606 GN=CAPNS1 PE=1 SV=1	[R].THYSNIEANESEEVR.[Q]			39608							15.2735							-3.48114						-5.08553	-3.48114	-4.77166	-4.45862	-4.73184	-4.42283		-0.0916509	-0.0916509	0.200101
P14649	Myosin light chain 6B OS=Homo sapiens OX=9606 GN=MYL6B PE=1 SV=1	[K].TKAEPAVPQAPQK.[T]		57357.7	457406	176375	36419.2	20679.2	65423.4		15.8077	18.8031	17.4283	15.1524	14.3359	15.9975		-1.399	0.0484702	-0.292038	-1.74403	-2.14328	-0.994882		-1.399	0.0484702	-0.292038	-1.74403	-2.14328	-0.994882		-1.07987	-1.48568	3.06117
P04792	Heat shock protein beta-1 OS=Homo sapiens OX=9606 GN=HSPB1 PE=1 SV=2	[K].TKDGVVEITGK.[H]		36158.7	172615	89144.2	34541.6	37254.2	74880		15.1421	17.3972	16.4439	15.076	15.1851	16.1923		-2.06465	-1.35745	-1.27647	-1.82039	-1.29406	-0.80011		-2.06465	-1.35745	-1.27647	-1.82039	-1.29406	-0.80011		0.261335	-0.174985	0.374866
P35579	Myosin-9 OS=Homo sapiens OX=9606 GN=MYH9 PE=1 SV=4	[K].THEAQIQEMR.[Q]			1.24255e+06	624651	20581.6		86343.7			20.2449	19.2527	14.3291		16.3978			1.49023	1.53237	-2.56737		-0.594599		-4.85279	1.49023	1.53237	-2.56737	-4.73652	-0.594599		-2.02276	-1.7311	75.0609
E9PRG8	Uncharacterized protein C11orf98 OS=Homo sapiens OX=9606 GN=C11orf98 PE=4 SV=2	[K].TAMEVEAPSKPAR.[T]		58993.4	422448	107669	70639.7		67297.4		15.8483	18.6884	16.7162	16.1082		16.0383		-1.35844	-0.0662304	-1.00407	-0.788245		-0.954139		-1.35844	-0.0662304	-1.00407	-0.788245	-4.75135	-0.954139		-1.355	-0.638286	1.38269
P02545	Prelamin-A/C OS=Homo sapiens OX=9606 GN=LMNA PE=1 SV=1	[R].TALINSTGEEVAMR.[K]	1xOxidation [M13]	114291	137841	56455.9		28161.7	46211.6		16.8024	17.0726	15.7848		14.7814	15.496		-0.404351	-1.682	-1.93548		-1.69772	-1.49643		-0.404351	-1.682	-1.93548	-4.58149	-1.69772	-1.49643		-1.25127	-0.90132	4.27226
Q9BPX5	Actin-related protein 2/3 complex subunit 5-like protein OS=Homo sapiens OX=9606 GN=ARPC5L PE=1 SV=1	[K].SSEIEQAVQSLDR.[N]			418381	179991	19406.7		22354.2			18.6745	17.4576	14.2443		14.4483			-0.0801883	-0.262756	-2.65217		-2.54414		-5.00214	-0.0801883	-0.262756	-2.65217	-4.80429	-2.54414		-1.55184	-1.22917	2.12087
P18583	Protein SON OS=Homo sapiens OX=9606 GN=SON PE=1 SV=4	[K].SSEPVVTMSVEYQMK.[S]	1xOxidation [M]	68516.5	405860	232936	114409	50109.1	217836		16.0642	18.6306	17.8296	16.8038	15.6128	17.7329		-1.14254	-0.124022	0.109254	-0.0925939	-0.866387	0.740479		-1.14254	-0.124022	0.109254	-0.0925939	-0.866387	0.740479		0.312935	0.230246	0.639001
P18583	Protein SON OS=Homo sapiens OX=9606 GN=SON PE=1 SV=4	[K].SSEPVVTMSVEYQMK.[S]	2xOxidation [M8	249550	222713	111563	171608	198209	101235		17.929	17.7648	16.7675	17.3888	17.5967	16.6273		0.722269	-0.98982	-0.952818	0.49232	1.11749	-0.365054		0.722269	-0.98982	-0.952818	0.49232	1.11749	-0.365054		0.821708	0.230246	0.639001
Q00839	Heterogeneous nuclear ribonucleoprotein U OS=Homo sapiens OX=9606 GN=HNRNPU PE=1 SV=6	[K].SSGPTSLFAVTVAPPGAR.[Q]		50994.1	90644.6	38405.7	25899.1		47880.8		15.638	16.4679	15.229	14.6606		15.5472		-1.56866	-2.28671	-2.49129	-2.23582		-1.44524		-1.56866	-2.28671	-2.49129	-2.23582	-4.86405	-1.44524		-0.732818	-0.337796	0.479685
P51991	Heterogeneous nuclear ribonucleoprotein A3 OS=Homo sapiens OX=9606 GN=HNRNPA3 PE=1 SV=2	[R].SSGSPYGGGYGSGGGSGGYGSR.[R]		30251.2	22138.3						14.8847	14.4343						-2.322	-4.32039						-2.322	-4.32039	-4.69749	-4.67719	-4.84637	-4.52622		-0.903303	-0.903303	1.53618
Q9BSD7	Cancer-related nucleoside-triphosphatase OS=Homo sapiens OX=9606 GN=NTPCR PE=1 SV=1	[K].SSGVPVDGFYTEEVR.[Q]			147058	56447.8						17.166	15.7846						-1.58861	-1.93569					-5.07671	-1.58861	-1.93569	-4.5526	-4.72282	-4.64684		-1.77374	-1.07605	1.52017
Q8N1N4	Keratin, type II cytoskeletal 78 OS=Homo sapiens OX=9606 GN=KRT78 PE=1 SV=2	[R].SSKAEAEALYQTK.[Y]			100927							16.623							-2.13169						-4.80005	-2.13169	-4.71582	-4.4517	-4.89975	-4.65193		-0.785272	-0.330554	0.526944
P01591	Immunoglobulin J chain OS=Homo sapiens OX=9606 GN=JCHAIN PE=1 SV=4	[R].SSEDPNEDIVER.[N]		92471.4	44879.4	24555.6		15130	59430		16.4967	15.4538	14.5838		13.8851	15.8589		-0.709982	-3.30088	-3.13656		-2.59405	-1.1335		-0.709982	-3.30088	-3.13656	-4.55327	-2.59405	-1.1335		-0.3778	-0.3778	0.347871
P81605	Dermcidin OS=Homo sapiens OX=9606 GN=DCD PE=1 SV=2	[R].SSLLEKGLDGAK.[K]		47868.4	77422	69627.6	90990.7	83908.1	97902.3		15.5468	16.2405	16.0874	16.4734	16.3565	16.5791		-1.65992	-2.51419	-1.63295	-0.423005	-0.12265	-0.413347		-1.65992	-2.51419	-1.63295	-0.423005	-0.12265	-0.413347		1.61602	1.30769	2.64405
Q9NR99	Matrix-remodeling-associated protein 5 OS=Homo sapiens OX=9606 GN=MXRA5 PE=1 SV=3	[K].SSLSTQDTLLIK.[K]		241201	108113	35947.7		25014.4	40723.1		17.8799	16.7222	15.1336		14.6105	15.3136		0.673174	-2.03246	-2.58671		-1.8687	-1.67884		0.673174	-2.03246	-2.58671	-4.47533	-1.8687	-1.67884		-1.35896	-1.35037	2.35877
P02751	Fibronectin OS=Homo sapiens OX=9606 GN=FN1 PE=1 SV=4	[R].SSPVVIDASTAIDAPSNLR.[F]		609660	874254	334373	52109.4	51241.4	208125		19.2176	19.7377	18.3511	15.6693	15.645	17.6671		2.01094	0.983047	0.630778	-1.22718	-0.83415	0.674689		2.01094	0.983047	0.630778	-1.22718	-0.83415	0.674689		-1.67047	-1.69425	11.343
Q86YZ3	Hornerin OS=Homo sapiens OX=9606 GN=HRNR PE=1 SV=2	[R].SSSRGPYESGSGHSSGLGHQESR.[S]			117815		59158.1					16.8462		15.8523					-1.90849		-1.04415				-4.86885	-1.90849	-4.76677	-1.04415	-4.89608	-4.6906		0.304426	0.626863	2.59816
Q86YZ3	Hornerin OS=Homo sapiens OX=9606 GN=HRNR PE=1 SV=2	[R].SSSRGPYESR.[SL]		199099	584037	383016	429863	433932	447198		17.6031	19.1557	18.547	18.7135	18.7271	18.7706		0.39642	0.401055	0.826725	1.81708	2.24794	1.77815		0.39642	0.401055	0.826725	1.81708	2.24794	1.77815		1.40632	0.626863	2.59816
Q86YZ3	Hornerin OS=Homo sapiens OX=9606 GN=HRNR PE=1 SV=2	[R].SSSSGQHGSGLGESSGFGHHESSSGQSSSYSQHGSGSGHSSGYGQHGSR.[S]			1.34726e+06		122431					20.3616		16.9016					1.60695		0.00517412				-5.07961	1.60695	-4.69871	0.00517412	-4.81452	-4.66		-0.432659	0.626863	2.59816
Q9BXF6	Rab11 family-interacting protein 5 OS=Homo sapiens OX=9606 GN=RAB11FIP5 PE=1 SV=1	[R].SSLSIALSSGLEK.[L]			131456	83774.9	37380.4		26821.1			17.0042	16.3542	15.19		14.7111			-1.75043	-1.36609	-1.70644		-2.28132		-4.86142	-1.75043	-1.36609	-1.70644	-4.7165	-2.28132		-0.24211	-0.24211	0.192721
P46821	Microtubule-associated protein 1B OS=Homo sapiens OX=9606 GN=MAP1B PE=1 SV=2	[R].SSYYVVSGNDPAAEEPSR.[A]			35877.7	31426.6			15635.8			15.1308	14.9397			13.9326			-3.62385	-2.78062			-3.05984		-5.04783	-3.62385	-2.78062	-4.52387	-4.65452	-3.05984		-0.261974	0.725278	2.16965
P13647	Keratin, type II cytoskeletal 5 OS=Homo sapiens OX=9606 GN=KRT5 PE=1 SV=3	[R].SRTEAESWYQTKYEELQQTAGR.[H]			75388							16.202							-2.5526						-4.82144	-2.5526	-4.67817	-4.54123	-4.74653	-4.67558		-0.637043	0.091607	0.259862
TGME49_203310-t26_1-p1	transcript=TGME49_203310-t26_1 | gene=TGME49_203310 | organism=Toxoplasma_gondii_ME49 | gene_product=dense granule protein GRA7 | transcript_product=dense granule protein GRA7 | location=TGME49_chrVIIa:2604424-2605134(+) | protein_length=236 | sequence_SO=chromosome | SO=protein_coding | is_pseudo=false	[R].SRQPALEQEVPESGK.[D]					122903	33343.5	41206.4					16.9072	15.0251	15.3306					0.0107249	-1.45405	-1.66182		-4.80832	-5.19802	-4.77569	0.0107249	-1.45405	-1.66182		3.89229	3.58578	18.7485
P60174	Triosephosphate isomerase OS=Homo sapiens OX=9606 GN=TPI1 PE=1 SV=3	[K].SNVSDAVAQSTR.[I]			70717.9	25134.8			40800.3			16.1098	14.6174			15.3163			-2.64486	-3.10292			-1.67611		-5.07857	-2.64486	-3.10292	-4.54693	-4.87042	-1.67611		-0.0890381	-0.0890381	0.0780316
Q13765	Nascent polypeptide-associated complex subunit alpha OS=Homo sapiens OX=9606 GN=NACA PE=1 SV=1	[K].SPASDTYIVFGEAK.[I]							26894.7							14.715							-2.27737		-4.93383	-5.25109	-4.92913	-4.49699	-4.68442	-2.27737		1.21843	1.32629	0.968425
Q9BVP2	Guanine nucleotide-binding protein-like 3 OS=Homo sapiens OX=9606 GN=GNL3 PE=1 SV=2	[R].SPASIEVVKPMEAASAILSQADAR.[Q]	1xOxidation [M11]		354847	136979			15942.2			18.4368	17.0636			13.9606			-0.317807	-0.656721			-3.03184		-4.83122	-0.317807	-0.656721	-4.67839	-4.67614	-3.03184		-2.19354	-1.18236	2.65887
Q6WCQ1	Myosin phosphatase Rho-interacting protein OS=Homo sapiens OX=9606 GN=MPRIP PE=1 SV=3	[K].SPDSATVSGYDIMK.[S]	1xOxidation [M13]		59478.2	33273						15.8601	15.0221						-2.89457	-2.69826					-4.9914	-2.89457	-2.69826	-4.55033	-4.8435	-4.61213		-1.14057	-1.27581	2.56929
P21333	Filamin-A OS=Homo sapiens OX=9606 GN=FLNA PE=1 SV=4	[K].SPFSVAVSPSLDLSK.[I]			776919	369121	71789.5		167172			19.5674	18.4937	16.1315		17.351			0.812759	0.773412	-0.764951		0.35857		-4.92227	0.812759	0.773412	-0.764951	-4.63917	0.35857		-0.569818	-0.801463	6.54648
Q13835	Plakophilin-1 OS=Homo sapiens OX=9606 GN=PKP1 PE=1 SV=2	[R].SPNQNVQQAAAGALR.[N]			23562.4							14.5242							-4.23045						-4.79387	-4.23045	-4.68909	-4.43211	-4.70132	-4.56561		0.00478473	0.00478473	0.0268282
P13647	Keratin, type II cytoskeletal 5 OS=Homo sapiens OX=9606 GN=KRT5 PE=1 SV=3	[R].SRTEAESWYQTK.[Y]			487052	42355	20086.3	19005.8	58011.4			18.8937	15.3702	14.2939	14.2142	15.824			0.139072	-2.35008	-2.60251	-2.26502	-1.16835		-4.96498	0.139072	-2.35008	-2.60251	-2.26502	-1.16835		0.380034	0.091607	0.259862
P46821	Microtubule-associated protein 1B OS=Homo sapiens OX=9606 GN=MAP1B PE=1 SV=2	[K].SPSDSGYSYETIGK.[T]		39469	86280.1	52823.8	45307	40872.4	71877.6		15.2684	16.3967	15.6889	15.4674	15.3188	16.1333		-1.93827	-2.35791	-2.03142	-1.42899	-1.16033	-0.859147		-1.93827	-2.35791	-2.03142	-1.42899	-1.16033	-0.859147		0.95971	0.725278	2.16965
P16070	CD44 antigen OS=Homo sapiens OX=9606 GN=CD44 PE=1 SV=3	[K].SQEMVHLVNKESSETPDQFMTADETR.[N]	2xOxidation [M4		47755.5							15.5434							-3.21126						-5.08591	-3.21126	-4.76309	-4.69277	-4.75876	-4.69599		-0.36242	-0.732672	1.32979
TGME49_270240-t26_1-p1	transcript=TGME49_270240-t26_1 | gene=TGME49_270240 | organism=Toxoplasma_gondii_ME49 | gene_product=MAG1 | transcript_product=MAG1 | location=TGME49_chrVIII:5312269-5313737(+) | protein_length=452 | sequence_SO=chromosome | SO=protein_coding | is_pseudo=false	[K].SQLALVEAFK.[A]					2.67364e+06	348596	961247					21.3504	18.4112	19.8745					4.45394	1.93203	2.88215		-4.8458	-5.40254	-4.67187	4.45394	1.93203	2.88215		8.06277	4.92705	34.9346
P11021	Endoplasmic reticulum chaperone BiP OS=Homo sapiens OX=9606 GN=HSPA5 PE=1 SV=2	[K].SQIFSTASDNQPTVTIK.[V]		73378.7	342822	93370.1	66506.9	46658.1	139867		16.1631	18.3871	16.5107	16.0212	15.5098	17.0937		-1.04363	-0.367546	-1.20965	-0.87522	-0.969334	0.10129		-1.04363	-0.367546	-1.20965	-0.87522	-0.969334	0.10129		0.292519	-0.218298	0.708121
P04080	Cystatin-B OS=Homo sapiens OX=9606 GN=CSTB PE=1 SV=2	[K].SQVVAGTNYFIK.[V]		132655	192499	161505	121508	89687.5	220337		17.0173	17.5545	17.3012	16.8907	16.4526	17.7493		-0.189386	-1.20015	-0.419099	-0.00575008	-0.0265529	0.756948		-0.189386	-1.20015	-0.419099	-0.00575008	-0.0265529	0.756948		0.844428	1.00384	1.10439
P13645	Keratin, type I cytoskeletal 10 OS=Homo sapiens OX=9606 GN=KRT10 PE=1 SV=6	[R].SQYEQLAEQNR.[K]		291288	6.04785e+06	487999	379066	284500	1.00887e+06		18.1521	22.528	18.8965	18.5321	18.1181	19.9443		0.945385	3.77335	1.1762	1.63565	1.6389	2.95191		0.945385	3.77335	1.1762	1.63565	1.6389	2.95191		0.110512	-0.141331	0.518507
P13645	Keratin, type I cytoskeletal 10 OS=Homo sapiens OX=9606 GN=KRT10 PE=1 SV=6	[R].SQYEQLAEQNRK.[D]		2.14562e+06	3.52044e+07	1.8452e+06	2.67891e+06	2.08846e+06	6.25784e+06		21.033	25.0693	20.8153	21.3532	20.994	22.5772		3.82626	6.31461	3.09502	4.45678	4.51483	5.58483		3.82626	6.31461	3.09502	4.45678	4.51483	5.58483		0.440185	-0.141331	0.518507
Q8N474	Secreted frizzled-related protein 1 OS=Homo sapiens OX=9606 GN=SFRP1 PE=1 SV=1	[K].SQYLLTAIHK.[W]		151496	1.04602e+06	500051		111533	206066		17.2089	19.9965	18.9317		16.7671	17.6527		0.00222157	1.24183	1.21139		0.287933	0.660344		0.00222157	1.24183	1.21139	-4.46826	0.287933	0.660344		-1.99181	-1.35647	2.37073
Q16643	Drebrin OS=Homo sapiens OX=9606 GN=DBN1 PE=1 SV=4	[R].SPSDSSTASTPVAEQIER.[A]			65935.8	37101		9005.5	14592.3			16.0088	15.1792		13.1366	13.8329			-2.74587	-2.54115		-3.34258	-3.15948		-5.07195	-2.74587	-2.54115	-4.61539	-3.34258	-3.15948		-0.252825	-0.241231	0.169266
P11142	Heat shock cognate 71 kDa protein OS=Homo sapiens OX=9606 GN=HSPA8 PE=1 SV=1	[K].STAGDTHLGGEDFDNR.[M]			68221.1	25085.9		10872.4	22773.5			16.0579	14.6146		13.4084	14.4751			-2.69671	-3.10573		-3.0708	-2.51733		-5.0178	-2.69671	-3.10573	-4.7017	-3.0708	-2.51733		0.176806	-0.279499	0.522606
TGME49_230705-t26_1-p1	transcript=TGME49_230705-t26_1 | gene=TGME49_230705 | organism=Toxoplasma_gondii_ME49 | gene_product=hypothetical protein | transcript_product=hypothetical protein | location=TGME49_chrVIII:990431-991782(-) | protein_length=266 | sequence_SO=chromosome | SO=protein_coding | is_pseudo=false	[R].STAVGLEGAADKATK.[L]					54061.9	11919.7	17798.9					15.7223	13.5411	14.1195					-1.17411	-2.93811	-2.87291		-5.03434	-5.32204	-4.68131	-1.17411	-2.93811	-2.87291		2.68418	3.40572	8.14165
P07305	Histone H1.0 OS=Homo sapiens OX=9606 GN=H1F0 PE=1 SV=3	[K].STDHPKYSDMIVAAIQAEK.[N]	1xOxidation [M10]	350790	1.30875e+06	675520	893281		130109		18.4202	20.3198	19.3656	19.7688		16.9894		1.21354	1.56511	1.64532	2.87232		-0.00304234		1.21354	1.56511	1.64532	2.87232	-4.88624	-0.00304234		-2.14698	-0.798558	2.45748
P63104	14-3-3 protein zeta/delta OS=Homo sapiens OX=9606 GN=YWHAZ PE=1 SV=1	[K].SVTEQGAELSNEER.[N]		23540.5	130401	75241.1	21421.2	30869.2	43795.1		14.5229	16.9926	16.1992	14.3868	14.9139	15.4185		-2.68385	-1.76205	-1.52109	-2.50968	-1.56529	-1.57392		-2.68385	-1.76205	-1.52109	-2.50968	-1.56529	-1.57392		0.10603	-0.2884	0.402571
Q08188	Protein-glutamine gamma-glutamyltransferase E OS=Homo sapiens OX=9606 GN=TGM3 PE=1 SV=4	[R].SWNGSVEILK.[N]			102832				31918.3			16.6499				14.9621			-2.10472				-2.03031		-5.03046	-2.10472	-4.87624	-4.65245	-4.7077	-2.03031		0.20699	-0.29331	0.410136
P60709	Actin, cytoplasmic 1 OS=Homo sapiens OX=9606 GN=ACTB PE=1 SV=1 Actin, alpha skeletal muscle OS=Homo sapiens OX=9606 GN=ACTA1 PE=1 SV=1	[K].SYELPDGQVITIGNER.[F]		136442	1.73079e+07	6.53118e+06	450117	51227.1	1.35258e+06		17.0579	24.0449	22.6389	18.7799	15.6446	20.3673		-0.148779	5.29028	4.91859	1.8835	-0.834553	3.37488		-0.148779	5.29028	4.91859	1.8835	-0.834553	3.37488		-1.87875	-1.70874	12.7917
Q8IWK6	Adhesion G protein-coupled receptor A3 OS=Homo sapiens OX=9606 GN=ADGRA3 PE=1 SV=2	[K].SYGLNLAIQNGPIK.[S]		48513.7	271522	123050	129231	54154.4	127981		15.5661	18.0507	16.9089	16.9796	15.7248	16.9656		-1.6406	-0.703938	-0.811431	0.0831532	-0.754382	-0.0268282		-1.6406	-0.703938	-0.811431	0.0831532	-0.754382	-0.0268282		0.819303	0.094451	0.122435
P07355	Annexin A2 OS=Homo sapiens OX=9606 GN=ANXA2 PE=1 SV=2	[K].SYSPYDMLESIR.[K]	1xOxidation [M7]		87178.8							16.4117							-2.34296						-5.06323	-2.34296	-4.95387	-4.49865	-4.90726	-4.56742		-0.537758	-0.226677	0.443687
P02751	Fibronectin OS=Homo sapiens OX=9606 GN=FN1 PE=1 SV=4	[R].SYTITGLQPGTDYK.[I]		760890	846205	335955	68973	63987.7	223170		19.5373	19.6906	18.3579	16.0737	15.9655	17.7678		2.33063	0.936003	0.637587	-0.822693	-0.513667	0.775384		2.33063	0.936003	0.637587	-0.822693	-0.513667	0.775384		-1.4884	-1.69425	11.343
Q9H8G2	Caspase activity and apoptosis inhibitor 1 OS=Homo sapiens OX=9606 GN=CAAP1 PE=1 SV=2	[K].SVNEILGLAESSPNEPK.[A]			32355.7							14.9817							-3.77291						-5.07858	-3.77291	-4.75214	-4.48799	-4.80973	-4.6278		-0.107296	-0.107296	0.298991
Q9Y6N5	Sulfide:quinone oxidoreductase, mitochondrial OS=Homo sapiens OX=9606 GN=SQOR PE=1 SV=1	[K].TAAAVAAQSGILDR.[T]			74848.1							16.1917							-2.56297						-4.88151	-2.56297	-4.72481	-4.53586	-4.7631	-4.67194		-0.600541	-0.600541	0.980845
P35908	Keratin, type II cytoskeletal 2 epidermal OS=Homo sapiens OX=9606 GN=KRT2 PE=1 SV=2	[R].TAAENDFVTLKK.[D]		404030	8.08477e+06	239823	403016	445541	1.05112e+06		18.6241	22.9468	17.8716	18.6205	18.7652	20.0035		1.4174	4.19213	0.151291	1.72404	2.28603	3.0111		1.4174	4.19213	0.151291	1.72404	2.28603	3.0111		0.420113	0.181252	0.903762
P04259	Keratin, type II cytoskeletal 6B OS=Homo sapiens OX=9606 GN=KRT6B PE=1 SV=5 Keratin, type II cytoskeletal 6A OS=Homo sapiens OX=9606 GN=KRT6A PE=1 SV=3 Keratin, type II cytoskeletal 3 OS=Homo sapiens OX=9606 GN=KRT3 PE=1 SV=3	[R].TAAENEFVTLK.[K]		45105.3	951264	107638	42693.1	134906	116715		15.461	19.8595	16.7158	15.3817	17.0416	16.8326		-1.74569	1.10484	-1.00449	-1.51472	0.562419	-0.159773		-1.74569	1.10484	-1.00449	-1.51472	0.562419	-0.159773		0.177757	0.27429	0.873474
P04259	Keratin, type II cytoskeletal 6B OS=Homo sapiens OX=9606 GN=KRT6B PE=1 SV=5 Keratin, type II cytoskeletal 6A OS=Homo sapiens OX=9606 GN=KRT6A PE=1 SV=3 Keratin, type II cytoskeletal 3 OS=Homo sapiens OX=9606 GN=KRT3 PE=1 SV=3	[R].TAAENEFVTLKK.[D]		63498.2	1.34257e+06	163424	54450.4	306126	159237		15.9544	20.3566	17.3183	15.7327	18.2238	17.2808		-1.25227	1.60192	-0.402064	-1.16378	1.74459	0.288413		-1.25227	1.60192	-0.402064	-1.16378	1.74459	0.288413		0.307214	0.27429	0.873474
P10599	Thioredoxin OS=Homo sapiens OX=9606 GN=TXN PE=1 SV=3	[K].TAFQEALDAAGDK.[L]		16247	239181	64617	39247.4	12905.6	60488.6		13.9879	17.8677	15.9796	15.2603	13.6557	15.8844		-3.21881	-0.886899	-1.7407	-1.63613	-2.82346	-1.10803		-3.21881	-0.886899	-1.7407	-1.63613	-2.82346	-1.10803		0.0929308	0.432398	0.440437
Q9Y608	Leucine-rich repeat flightless-interacting protein 2 OS=Homo sapiens OX=9606 GN=LRRFIP2 PE=1 SV=1	[R].TALDKIEEMEMTNSHLAK.[R]	1xOxidation [M11]		158646							17.2755							-1.47919						-5.04783	-1.47919	-4.9224	-4.67307	-4.79929	-4.47207		-0.831667	-1.52753	6.05819
P35908	Keratin, type II cytoskeletal 2 epidermal OS=Homo sapiens OX=9606 GN=KRT2 PE=1 SV=2	[R].TAAENDFVTLK.[K]		332523	7.71783e+06	288012	380363	382498	1.14001e+06		18.3431	22.8798	18.1358	18.537	18.5451	20.1206		1.13639	4.12512	0.415447	1.64058	2.06592	3.12822		1.13639	4.12512	0.415447	1.64058	2.06592	3.12822		0.385921	0.181252	0.903762
Q8WUM4	Programmed cell death 6-interacting protein OS=Homo sapiens OX=9606 GN=PDCD6IP PE=1 SV=1	[R].SVIEQGGIQTVDQLIK.[E]					90679.2		74896.7					16.4685		16.1926					-0.427953		-0.799787		-4.90203	-5.30856	-4.9622	-0.427953	-4.78186	-0.799787		3.0544	3.00135	4.21966
P02545	Prelamin-A/C OS=Homo sapiens OX=9606 GN=LMNA PE=1 SV=1	[R].SVGGSGGGSFGDNLVTR.[S]		340060	271890	136711	72041.8	94577.1	154152		18.3754	18.0527	17.0608	16.1365	16.5292	17.234		1.16873	-0.701982	-0.659547	-0.75989	0.0500305	0.24159		1.16873	-0.701982	-0.659547	-0.75989	0.0500305	0.24159		-0.0918225	-0.90132	4.27226
Q07065	Cytoskeleton-associated protein 4 OS=Homo sapiens OX=9606 GN=CKAP4 PE=1 SV=2	[R].SVGELPSTVESLQK.[V]			279413	124552	62849.1	61217.2	112981			18.092	16.9264	15.9396	15.9016	16.7857			-0.662606	-0.793933	-0.956832	-0.577523	-0.206682		-4.82778	-0.662606	-0.793933	-0.956832	-0.577523	-0.206682		1.51443	0.114884	0.322937
P61626	Lysozyme C OS=Homo sapiens OX=9606 GN=LYZ PE=1 SV=1	[R].STDYGIFQINSR.[Y]			430573	70184.1	37691.3		516155			18.7159	16.0989	15.2019		18.9774			-0.0387461	-1.62147	-1.69449		1.98504		-4.86557	-0.0387461	-1.62147	-1.69449	-4.62442	1.98504		0.730638	1.4941	1.07956
P26373	60S ribosomal protein L13 OS=Homo sapiens OX=9606 GN=RPL13 PE=1 SV=4	[K].STESLQANVQR.[L]		6.91848e+06	3.27236e+07	7.80712e+06	7.26268e+06	9.90418e+06	1.61312e+07		22.722	24.9638	22.8964	22.7921	23.2396	23.9433		5.51532	6.20918	5.17604	5.89563	6.76043	6.95095		5.51532	6.20918	5.17604	5.89563	6.76043	6.95095		0.902158	-0.793343	1.63806
P07737	Profilin-1 OS=Homo sapiens OX=9606 GN=PFN1 PE=1 SV=2	[K].STGGAPTFNVTVTK.[T]			87359	77111.6	20961.1	30700.9	47702.5			16.4147	16.2347	14.3554	14.906	15.5418			-2.33998	-1.48566	-2.54101	-1.57318	-1.45062		-5.01417	-2.33998	-1.48566	-2.54101	-1.57318	-1.45062		1.09167	0.706278	0.519573
P02452	Collagen alpha-1(I) chain OS=Homo sapiens OX=9606 GN=COL1A1 PE=1 SV=5	[K].STGGISVPGPMGPSGPR.[G]			225392				47421.6			17.7821				15.5333			-0.97257				-1.45915		-4.81542	-0.97257	-4.74912	-4.5517	-4.84104	-1.45915		-0.104927	-1.1456	6.43533
TGME49_230705-t26_1-p1	transcript=TGME49_230705-t26_1 | gene=TGME49_230705 | organism=Toxoplasma_gondii_ME49 | gene_product=hypothetical protein | transcript_product=hypothetical protein | location=TGME49_chrVIII:990431-991782(-) | protein_length=266 | sequence_SO=chromosome | SO=protein_coding | is_pseudo=false	[R].STGTIEYVETQIMQK.[L]	1xOxidation [M13]				54591.1							15.7364							-1.16006				-4.95161	-5.34138	-4.78237	-1.16006	-4.64512	-4.52066		1.58318	3.40572	8.14165
Q07065	Cytoskeleton-associated protein 4 OS=Homo sapiens OX=9606 GN=CKAP4 PE=1 SV=2	[R].STLQTMESDIYTEVR.[E]	1xOxidation [M6]				39335.6							15.2635							-1.63289				-4.80711	-5.21979	-4.88808	-1.63289	-4.75774	-4.51534		1.33634	0.114884	0.322937
P35527	Keratin, type I cytoskeletal 9 OS=Homo sapiens OX=9606 GN=KRT9 PE=1 SV=3	[K].STMQELNSR.[L]		3.84597e+06	71762116	5.66836e+06	3.999e+06	4.69889e+06	11920993		21.8749	26.0967	22.4345	21.9312	22.1639	23.507		4.66821	7.34207	4.71418	5.03477	5.68472	6.5146		4.66821	7.34207	4.71418	5.03477	5.68472	6.5146		0.169873	-0.363396	2.17627
P35527	Keratin, type I cytoskeletal 9 OS=Homo sapiens OX=9606 GN=KRT9 PE=1 SV=3	[K].STMQELNSR.[L]	1xOxidation [M3]	2.90785e+06	2.06916e+07	2.19971e+06	2.9389e+06	4.13906e+06	5.09542e+06		21.4715	24.3025	21.0689	21.4868	21.9809	22.2808		4.26482	5.5479	3.34856	4.59041	5.5017	5.28837		4.26482	5.5479	3.34856	4.59041	5.5017	5.28837		0.739733	-0.363396	2.17627
P02751	Fibronectin OS=Homo sapiens OX=9606 GN=FN1 PE=1 SV=4	[R].STTPDITGYR.[I]		976778	494705	212803	73195.8	129727	131815		19.8977	18.9162	17.6992	16.1595	16.9851	17.0082		2.69097	0.161564	-0.0211589	-0.736964	0.505948	0.0157518		2.69097	0.161564	-0.0211589	-0.736964	0.505948	0.0157518		-1.01555	-1.69425	11.343
Q96IZ0	PRKC apoptosis WT1 regulator protein OS=Homo sapiens OX=9606 GN=PAWR PE=1 SV=1	[K].STTSVSEEDVSSR.[Y]			65865.2							16.0072							-2.74742						-4.89058	-2.74742	-4.93275	-4.48683	-4.78439	-4.4489		-0.383127	-0.741239	0.794562
P68104	Elongation factor 1-alpha 1 OS=Homo sapiens OX=9606 GN=EEF1A1 PE=1 SV=1	[K].STTTGHLIYK.[LC]		134347	288043	231903	147780	161687	266326		17.0356	18.1359	17.8232	17.1731	17.3028	18.0228		-0.171094	-0.61872	0.102842	0.276654	0.823669	1.03043		-0.171094	-0.61872	0.102842	0.276654	0.823669	1.03043		0.939242	0.343021	0.48797
P18583	Protein SON OS=Homo sapiens OX=9606 GN=SON PE=1 SV=4	[K].SVESTSPEPSK.[I]		217751	346031	151956	155217	141058	177581		17.7323	18.4005	17.2133	17.2439	17.1059	17.4381		0.525617	-0.354105	-0.507031	0.347492	0.626759	0.445717		0.525617	-0.354105	-0.507031	0.347492	0.626759	0.445717		0.585162	0.230246	0.639001
P18583	Protein SON OS=Homo sapiens OX=9606 GN=SON PE=1 SV=4	[K].SVESTSPEPSKIMLVEPPVAK.[V]	1xOxidation [M13]	66931.4			65699	31382.2			16.0304			16.0036	14.9377			-1.17631			-0.892851	-1.54152			-1.17631	-5.13698	-4.90352	-0.892851	-1.54152	-4.6839		1.36618	0.230246	0.639001
O95425	Supervillin OS=Homo sapiens OX=9606 GN=SVIL PE=1 SV=2	[R].SNEEEETSDSSLEK.[Q]			96311	49171.4						16.5554	15.5855						-2.19923	-2.13479					-4.91776	-2.19923	-2.13479	-4.61246	-4.83611	-4.58684		-1.59454	-1.03429	2.2621
P35579	Myosin-9 OS=Homo sapiens OX=9606 GN=MYH9 PE=1 SV=4	[K].KQELEEICHDLEAR.[V]	1xCarbamidomethyl [C8]		136352	45554.5						17.057	15.4753						-1.69767	-2.24501					-4.79761	-1.69767	-2.24501	-4.53404	-4.68076	-4.44479		-1.63976	-1.7311	75.0609
P62979	Ubiquitin-40S ribosomal protein S27a OS=Homo sapiens OX=9606 GN=RPS27A PE=1 SV=2	[K].YYKVDENGKISR.[L]		640662	347661	239552	34842.1	202583	145481		19.2892	18.4073	17.87	15.0885	17.6282	17.1505		2.0825	-0.347325	0.149661	-1.80789	1.14898	0.158068		2.0825	-0.347325	0.149661	-1.80789	1.14898	0.158068		-0.795227	-0.073528	0.140305
P62979	Ubiquitin-40S ribosomal protein S27a OS=Homo sapiens OX=9606 GN=RPS27A PE=1 SV=2	[K].ESTLHLVLR.[L]		921693	1.86919e+06	589212	268748	348479	708073		19.8139	20.834	19.1684	18.0359	18.4107	19.4335		2.60722	2.07933	1.44811	1.13946	1.93154	2.44114		2.60722	2.07933	1.44811	1.13946	1.93154	2.44114		-0.207509	-0.073528	0.140305
P35580	Myosin-10 OS=Homo sapiens OX=9606 GN=MYH10 PE=1 SV=3 Myosin-9 OS=Homo sapiens OX=9606 GN=MYH9 PE=1 SV=4 Myosin-14 OS=Homo sapiens OX=9606 GN=MYH14 PE=1 SV=2	[K].FDQLLAEEK.[STA]		220684	4.11011e+06	1.5447e+06	126099	164984	298123		17.7516	21.9707	20.5589	16.9442	17.332	18.1855		0.544918	3.2161	2.83858	0.0477589	0.852793	1.19315		0.544918	3.2161	2.83858	0.0477589	0.852793	1.19315		-1.50197	-1.95045	59.9637
Q5XKE5	Keratin, type II cytoskeletal 79 OS=Homo sapiens OX=9606 GN=KRT79 PE=1 SV=2 Keratin, type II cytoskeletal 1b OS=Homo sapiens OX=9606 GN=KRT77 PE=2 SV=3 Keratin, type II cytoskeletal 2 epidermal OS=Homo sapiens OX=9606 GN=KRT2 PE=1 SV=2 Keratin, type II cytoskeletal 6B OS=Homo sapiens OX=9606 GN=KRT6B PE=1 SV=5 Keratin, type II cytoskeletal 6A OS=Homo sapiens OX=9606 GN=KRT6A PE=1 SV=3 Keratin, ty…	[K].FASFIDKVR.[F]		367610	8.91893e+06	514913	475481	446264	1.2397e+06		18.4878	23.0884	18.974	18.859	18.7675	20.2416		1.28111	4.33379	1.25365	1.96259	2.28837	3.24916		1.28111	4.33379	1.25365	1.96259	2.28837	3.24916		0.210522	-0.384744	0.814255
P08670	Vimentin OS=Homo sapiens OX=9606 GN=VIM PE=1 SV=4	[R].FANYIDKVR.[F]		940352	4.88567e+06	1.21162e+06	364587	326931	476672		19.8428	22.2201	20.2085	18.4759	18.3186	18.8626		2.63614	3.46548	2.48818	1.57947	1.83945	1.87024		2.63614	3.46548	2.48818	1.57947	1.83945	1.87024		-1.10022	-1.45396	18.1104
P60903	Protein S100-A10 OS=Homo sapiens OX=9606 GN=S100A10 PE=1 SV=2	[K].FAGDKGYLTKEDLR.[V]		85199.8	340214	198703	254582	41319.5	180087		16.3786	18.3761	17.6003	17.9578	15.3345	17.4583		-0.828139	-0.378561	-0.120065	1.06134	-1.14464	0.465928		-0.828139	-0.378561	-0.120065	1.06134	-1.14464	0.465928		0.569798	0.355083	0.253409
P16401	Histone H1.5 OS=Homo sapiens OX=9606 GN=HIST1H1B PE=1 SV=3	[K].ALAAGGYDVEKNNSR.[I]		5.73453e+06	1.6779e+07	5.87021e+06	4.0963e+06	2208230	2.4602e+06		22.4512	24.0002	22.485	21.9659	21.0745	21.2303		5.24454	5.24551	4.76466	5.06945	4.59529	4.23794		5.24454	5.24551	4.76466	5.06945	4.59529	4.23794		-0.450677	-0.31797	0.899107
TGME49_227620-t26_1-p1	transcript=TGME49_227620-t26_1 | gene=TGME49_227620 | organism=Toxoplasma_gondii_ME49 | gene_product=dense granule protein GRA2 | transcript_product=dense granule protein GRA2 | location=TGME49_chrX:870576-871374(-) | protein_length=185 | sequence_SO=chromosome | SO=protein_coding | is_pseudo=false	[K].FAENVGQHSEK.[A]					198694	103626	78453.7					17.6002	16.661	16.2596					0.703749	0.181848	-0.732849		-5.04193	-5.38566	-4.89258	0.703749	0.181848	-0.732849		5.15764	4.59163	2.43438
P21333	Filamin-A OS=Homo sapiens OX=9606 GN=FLNA PE=1 SV=4	[K].FADQHVPGSPFSVK.[V]		70169.5	466134	311491	90834.9	29272	139158		16.0986	18.8304	18.2488	16.471	14.8372	17.0864		-1.10815	0.075739	0.528508	-0.425477	-1.64194	0.0939623		-1.10815	0.075739	0.528508	-0.425477	-1.64194	0.0939623		-0.489851	-0.801463	6.54648
P08670	Vimentin OS=Homo sapiens OX=9606 GN=VIM PE=1 SV=4	[K].FADLSEAANR.[N]		829471	3.47327e+06	1.15212e+06	314559	297548	323030		19.6618	21.7279	20.1359	18.263	18.1828	18.3013		2.45513	2.97322	2.41554	1.36653	1.70359	1.30891		2.45513	2.97322	2.41554	1.36653	1.70359	1.30891		-1.15495	-1.45396	18.1104
P08865	40S ribosomal protein SA OS=Homo sapiens OX=9606 GN=RPSA PE=1 SV=4	[K].FAAATGATPIAGR.[F]		68242.9	172784	97566.2	29724.2	24642.1	30404.5		16.0584	17.3986	16.5741	14.8593	14.5888	14.892		-1.14831	-1.35604	-1.14623	-2.03709	-1.89033	-2.10041		-1.14831	-1.35604	-1.14623	-2.03709	-1.89033	-2.10041		-0.792416	-1.09905	0.810178
P62899	60S ribosomal protein L31 OS=Homo sapiens OX=9606 GN=RPL31 PE=1 SV=1	[R].EYTINIHKR.[I]		114409	339235	131523	35940.1	57598.5	71231.8		16.8038	18.3719	17.005	15.1333	15.8137	16.1202		-0.402859	-0.382721	-0.71536	-1.76313	-0.665429	-0.872169		-0.402859	-0.382721	-0.71536	-1.76313	-0.665429	-0.872169		-0.599929	-1.2697	1.41523
P35580	Myosin-10 OS=Homo sapiens OX=9606 GN=MYH10 PE=1 SV=3	[K].ALAYDKLEK.[T]		193182	3.21202e+06	1.042e+06	90940.7	99022	200944		17.5596	21.6151	19.9909	16.4726	16.5955	17.6164		0.352899	2.86041	2.27061	-0.423798	0.116289	0.624034		0.352899	2.86041	2.27061	-0.423798	0.116289	0.624034		-1.72246	-1.95045	59.9637
P08670	Vimentin OS=Homo sapiens OX=9606 GN=VIM PE=1 SV=4	[R].EYQDLLNVK.[M]		850679	5016635	1.97099e+06	427225	430478	466020		19.6983	22.2583	20.9105	18.7046	18.7156	18.83		2.49155	3.50364	3.19016	1.8082	2.23641	1.83763		2.49155	3.50364	3.19016	1.8082	2.23641	1.83763		-1.10104	-1.45396	18.1104
Q8IWK6	Adhesion G protein-coupled receptor A3 OS=Homo sapiens OX=9606 GN=ADGRA3 PE=1 SV=2	[R].EYAYDVPTSVEGSVQNGLPK.[S]			107821	66286.8	48995.7		23671.2			16.7183	16.0164	15.5804		14.5308			-2.03637	-1.70389	-1.31607		-2.46155		-5.05132	-2.03637	-1.70389	-1.31607	-4.89127	-2.46155		0.0408943	0.094451	0.122435
Q06033	Inter-alpha-trypsin inhibitor heavy chain H3 OS=Homo sapiens OX=9606 GN=ITIH3 PE=1 SV=2	[K].EVSFDVELPK.[T]		26017.4	71723.5	56802.3	64265.7	25426.4	58105.6		14.6672	16.1302	15.7937	15.9718	14.634	15.8264		-2.53951	-2.62449	-1.92666	-0.924674	-1.84513	-1.16601		-2.53951	-2.62449	-1.92666	-0.924674	-1.84513	-1.16601		1.05161	1.05161	4.5343
[truncated: 1,660 more rows]

## Sheet: Tz-HFF_VolcanoPlot
Average Protein Log2 Fold Change	Negative Log2 p Value	Protein Accesion No. (and Short Name)
-1.72908	74.9159	P35579	Green Fill = p < 0.05, Log2 FC > 1
-1.94173	59.583	P35580	Bold Text = ESCRT/ESCRT Associated Protein
5.94413	38.5376	TGME49_239740-t26_1-p1 (GRA14)
[truncated: 582 more rows]

## Sheet: Bz-HFF_PeptideCalc
Protein Accession Number	Protein Descriptions	Peptide Sequence	Peptide Modifications	Peptide Intensity: Control Replicate 1	Peptide Intensity: Control Replicate 2	Peptide Intensity: Control Replicate 3	Peptide Intensity: GRA14-HA Replicate 1	Peptide Intensity: GRA14-HA Replicate 2	Peptide Intensity: GRA14-HA Replicate 3	Log2 Conversion	Control Replicate 1	Control Replicate 2	Control Replicate 3	GRA14-HA Replicate 1	GRA14-HA Replicate 2	GRA14-HA Replicate 3	Normalization	Control Replicate 1	Control Replicate 2	Control Replicate 3	GRA14-HA Replicate 1	GRA14-HA Replicate 2	GRA14-HA Replicate 3	Imputation	Control Replicate 1	Control Replicate 2	Control Replicate 3	GRA14-HA Replicate 1	GRA14-HA Replicate 2	GRA14-HA Replicate 3	T-Test	Average Peptide Log2 Fold Change	Average Protein Log2 Fold Change	Negative Log2 p Value
[truncated: 2,336 more rows]

[truncated: 5 more sheets: Bz-HFF_VolcanoPlot, Neuron_PeptideCalc, Neuron_VolcanoPlot, HFF_Toxo_PeptideRawData, Neuron_Toxo_PeptideRawData]
